# Supplementary material for: Stunned Silence: Gene Expression Programs in Human Cells Infected with Monkeypox or Vaccinia Virus
Source: PLoS One. 2011 Jan 18;6(1):e15615. doi: 10.1371/journal.pone.0015615 (PMC3022624; doi:10.1371/journal.pone.0015615)
Supplement: Figure S3a — Viral growth curves following infection of human dermal fibroblasts with MPV or VAC-WR. Supernatants collected at the indicated times after MPV (red curve) or VAC-WR (blue curve) or killed MPV (orange curve) infection of human dermal fibroblasts were serially diluted and added in duplicate to confluent monolayer cultures of Vero E6 cells. Cells were then incubated for 1 hour at 37°C with periodic rocking. The medium was then replaced with a 0.5% agarose solution with 2% EBME, HEPES and 10% FBS. Cells were then incubated at 37°C for 4–5 days, followed by removal of the agarose overlay. Plaques were stained with 2 mL of crystal violet solution and counted. The assays revealed replication-competent progeny virus in the culture medium of primary human fibroblasts following infection with MPV or VAC-WR, but not with killed MPV; 12,000 to 16,000 PFU/mL were detected at 24 hours post infection. Figure S3a contains complete data corresponding to Figure 3 (as calculated Data are provided as tab-delimited text in a “.cdt” format. Each row (except row 1) represents a gene and each column (except columns 1–4) represents an experimental sample. Each cell represents a quantitative measurement (on a log scale) of the ratio of the abundance of transcripts from the specified gene in the specified sample, to the same gene's abundance in the “time zero” sample (prior to infection or chemical treatment). The samples are identified by the headers in row 1. The genes are identified by name in Column 3. To open, display and browse these data with the Treeview visualization program (eg., Java Treeview [44]), rename this file as “Figure 3.cdt”, and rename Figure S3b as “Figure 3.gtr” and store them in the same folder. (CDT) [file pone.0015615.s005.cdt]

GID	CLID	NAME	GWEIGHT	0 hr macrophage donor 1 repl. 1||CPVn147 	0 hr macrophage donor 1 repl. 2||CPVn152 	0 hr macrophage donor 1 repl. 3||CPVn162 	0 hr macrophage donor 1 repl. 4||CPVn168 	0 hr macrophage donor 1 repl. 5||CPVn176 	Mock: I+P 12 hr macrophage donor 1||CPVn169 	Mock: I+P 24 hr macrophage donor 1||CPVn170 	MPV: I+P 1 hr macrophage donor 1||CPVn171 	MPV: I+P 2 hr macrophage donor 1||CPVn172 	MPV: I+P 6 hr macrophage donor 1||CPVn173 	MPV: I+P 12 hr macrophage donor 1||CPVn174 	MPV: I+P 24 hr macrophage donor 1||CPVn175 	Mock: poly(I-C) 12 hr macrophage donor 1||CPVn177 	Mock: poly(I-C) 24 hr macrophage donor 1||CPVn178 	MPV: poly(I-C) 1 hr macrophage donor 1||CPVn179 	MPV: poly(I-C) 2 hr macrophage donor 1||CPVn180 	MPV: poly(I-C) 6 hr macrophage donor 1||CPVn181 	MPV: poly(I-C) 12 hr macrophage donor 1||CPVn182 	0 hr fibroblasts repl. 1||CPVn010 	0 hr fibroblasts repl. 2||CPVn017 	0 hr fibroblasts repl. 3||CPVn027 	0 hr fibroblasts repl. 4||CPVn060 	Mock: I+P 12 h fibroblasts||CPVn061 	Mock: I+P 24 h fibroblasts||CPVn062 	MPV: I+P 1 h fibroblasts||CPVn063 	MPV: I+P 2 h fibroblasts||CPVn064 	MPV: I+P 6 h fibroblasts||CPVn065 	MPV: I+P 12 h fibroblasts||CPVn066 	MPV: I+P 24 h fibroblasts||CPVn067 	Mock: poly(I-C) 12 h fibroblasts||CPVn068 	Mock: poly(I-C) 24 h fibroblasts||CPVn069 	MPV: poly(I-C) 1 h fibroblasts||CPVn070 	MPV: poly(I-C) 2 h fibroblasts||CPVn071 	MPV: poly(I-C) 6 h fibroblasts||CPVn072 	MPV: poly(I-C) 12 h fibroblasts||CPVn073 
GENE855X	11101	 ATE1 -  Arginyltransferase 1	1	0.19	0.02	-0.51	0.08	0.21	-0.5	-0.04	-0.19	0	-0.03	-0.92	0.87	-0.32	-0.36	0.04	0.25	0.29	0.16	0.66	0.05	0.41	-1.12	0.14	0.41	0.06	-0.58	-0.21	1.11	1.84	0.7	0.76	0.13	0.16	0.09	1.94
GENE358X	140290	 TCP10L -  T-complex 10 (mouse)-like	1	-0.02	0.26	0.18	-0.34	-0.07	-0.33	0.27	-0.41	-0.56	-0.58	-0.1	0.6	0.01	0.31	-0.45	-0.46	-0.69	1.27	0.32	0.38	-0.26	-0.45	-0.19	0.62	0.31	-0.89	0.09	0.95	2.7	0.76	0.28	0.11	-0.2	-0.34	2.46
GENE211X	8605	" PLA2G4C -  Phospholipase A2, group IVC (cytosolic, calcium-independent)"	1	0.03	-0.04	-0.11	0.33	-0.2	-1.27	-0.35	-0.44	-0.75	-1.3	-1.55	0.13	0.56	-0.32	-0.61	-0.45	-1.14	0.52	0.35	-0.38	0.37	-0.33	-0.47	1.56	0	-0.91	-0.36	1.72	3.29	3.43	2.54	0.17	0.26	-0.15	4.26
GENE151X	121268	 RHEBL1 -  Ras homolog enriched in brain like 1	1	0.98	0.12	-0.87	-0.03	-0.2	-0.46	0.61	0.1	-0.21	-0.54	-0.38	0.93	0.27	0.05	0.33	-0.25	-0.16	0.68	-1.23	-0.08	0.78	0.52	0.21		0.28	-0.37	-0.16	0.19		1.97	2.74	0.37	0.13	0.68	4.02
GENE1588X	63027	" SLC22A23 -  solute carrier family 22, member 23"	1	0.34	0.15	-0.5	0.09	-0.25	0.28	0.67	1.26	0.09	0.55	0.15	0.26	0.35	0.3	0.82	0.42	-0.37	0.76	0.05	-0.5	0.11	0.36	-0.47	-0.36	-0.11	-0.05	-0.53	-0.87	0.33	1.69	2.28	0.28	0.49	-0.16	0.18
GENE241X	9068	 ANGPTL1 -  Angiopoietin-like 1	1	1.14	0.4	-1.45	-0.29	0.18	-0.08	-0.36	-0.05	-0.05	-0.01	-0.89	1.6	0.09	-0.07	1.09	-0.14	-0.4	-0.63	-0.24	-0.66	0.68	0.21	0.22	0.31	0.38	-0.21		-0.5	-0.13	1.98	3.01	0.4	0.38	-0.31	1.09
GENE323X	3078	 CFHR1 -  Complement factor H-related 1	1	-0.31	0.08	-0.06	-0.33	0.62	0.67	1.23	0.69	0.44	0.76	1.17	0.47	0.79	1.22	0.6	-0.37	-0.09	0.3	-0.45	-0.62	0.47	0.6	0.34	-0.35	0.42	0.47	0.14	-0.06	-1.99	2.21	3.17	-1.26	-0.21	0.87	1.77
GENE1092X	81542	 TMX1 -  Thioredoxin-related transmembrane protein 1	1	-0.19	-0.02	-0.45	0.37	0.29	-0.27	0.3	0.07	0.18	0.13	-0.36	-0.17	0.22	0.61	0.57	0.09	0.41	0.88	-0.23	-0.19	-0.1	0.51	0.49	-0.58	0.16	0.34	-0.07	-0.11	-1.33	1.76	2.26	-1.18	0.3	0.08	0.63
GENE720X	10068	 IL18BP -  Interleukin 18 binding protein	1	-0.75	0.34	-1.24	0.97	0.69	-1.06	-2.09	0.24	-0.05	0.28	-0.94	-1.11	1.28	-0.29	0.74	0.9	0.84	0.86	-0.06	-0.94	0.45	0.56	0.93	0.53	0.7	0.39	0.04	0.45	-0.67	2.6	2.75	0.61	0.5	0.93	0.1
GENE917X	84102	" SLC41A2 -  Solute carrier family 41, member 2"	1	-0.01	-0.11	-0.77	0.53	0.37	-0.12	-1.02	-0.07	0.27	-0.05	-0.9	-1.9	0.56	0.18	0.39	-0.02	0.48	0.33	0.05	-0.87	0.16	0.67	1.71	1.15	0.35	0.47	0.52	1	-0.03	1.75	1.43	-0.19	0.44	0.44	0.7
GENE678X	3344	 FOXN2 -  Forkhead box N2	1	0.06	0.12	-0.54	0.29	0.05	-1.47	-0.6	0.51	0.16	-0.13	-1.41	-0.97	0.59	0.6	-0.01	0.98	-0.02	0.4	0.16	-1.14	0.95	0.03	0.54	1.61	0.73	0.33	0.03	1.42	0.63	1.77	1.57	0.92	1.18	0.66	0.89
GENE886X	11342	 RNF13 -  Ring finger protein 13	1	0.28	-0.69	0.22	0.19	0.02	-0.32	-0.73	0.17	0	-0.01	-0.75	0.03	0.13	0.4	0.06	0.33	0.1	1.04	0.29	-1.18	0.49	0.39	0.8	1.12	-0.24	-0.42	-0.66	0.62	-0.23	1.89	2.42	0.55	0.47	-0.21	0.51
GENE1442X	53917	" RAB24 -  RAB24, member RAS oncogene family"	1	-0.27	-0.17	0.22	0.14	0.06	-0.6	-0.06	0.15	-0.29	-0.26	-0.6	-0.43	0.49	0.67	-0.06	-0.48	0.06	0.84	-0.18	-0.16	0.08	0.25	1.18	1.45	0.04	0.03	0.01	0.83	0.08	2.3	1.81	0.2	0.29	-0.28	0.9
GENE538X	3241	 HPCAL1 -  Hippocalcin-like 1	1	-0.35	-0.13	0.27	0.16	0.03	-1.57	0.54	-0.02	-0.16	-0.13	-0.16	0.17	0.24	0.1	0.04	-0.03	-0.73	0.86	0.02	-0.71	0.43	0.27	1.02	1.07	-0.25	0.01	-0.25	1.39	0.28	1.87	1.73	0.38	0.32	-0.43	0.88
GENE510X	4790	 NFKB1 -  nuclear factor of kappa light polypeptide gene enhancer in B-cells 1	1	-0.11	-0.29	0.03	0.37	0.01	-0.27	-0.85	-0.31	0.04	0.48	-0.46	-0.15	0.67	0.03	0.04	0.07	0.61	1.58	-0.47	-0.24	0.19	0.52	2.22	0.84	0.22	1.27	1.18	2.27	1.31	1.93	2.28	0.32	1.45	1.5	2.15
GENE1219X	27106	 ARRDC2 -  Arrestin domain containing 2	1	-0.14	0.03	-0.71	0.49	0.32	-0.21	-0.37	-0.07	-0.17	-0.46	0.13	0.84	0.58	0.15	-0.28	0.44	0.24	2.43	-0.01	-0.86	0.08	0.8	0.47	0.93	0.13	1.59	0.32	0.39	0.64	1.69	2.47	0.14	1.72	1.52	2.22
GENE865X	2820	 GPD2 -  Glycerol-3-phosphate dehydrogenase 2 (mitochondrial)	1	0.57	0.22	-0.9	0.41	-0.3	-0.74	-0.23	0.03	-0.35	-0.36	-1.66	-0.62	0.09	-0.04	-0.04	0.02	-0.56	0.72	0.25	-0.43	0.32	-0.15	0.86	0.02	0.02	0.32	0.21	0.48	1.67	1.54	1.71	0.41	0.41	-0.28	1.03
GENE1199X	4664	 NAB1 -  NGFI-A binding protein 1 (EGR1 binding protein 1)	1	0.03	0.17	-0.02	-0.12	-0.07	0.03	-1.3	-0.07	-0.79	-0.13	-1.36	-1.8	0.15	-0.15	-0.23	-0.45	-0.36	-0.3	0.18	0.02	-0.19	-0.02	-0.58	0	0.09	0.93	0.22	-0.17	0.19	1.74	1.54	0	0.33	0.28	0.47
GENE262X	79132	 DHX58 -  DEXH (Asp-Glu-X-His) box polypeptide 58	1	0.12	-0.17	-0.2	0.22	0.04	-1.19	-0.38	-0.24	-0.37	-0.88	-1.1	-0.94	0.28	-0.03	-0.36	-0.26	-0.09	-0.06	0.59	0.08	-0.16	-0.5	-1.4	0.12	0.63	0.31	-0.32	-0.55	0.66	2.32	2.08	0.02	0.41	0.55	1.35
GENE270X	9473	 C1orf38 -  Chromosome 1 open reading frame 38	1	-0.02	-0.16	-0.09	0.21	0.06	-1.99	-1.4	0.02	-0.21	-0.63	-1.56	-2.68	-0.43	-1	-0.47	0.39	-0.09	-1.27	0.57	-0.14	0.38	-0.8	-1.5	0.23	-0.27	-0.82	-0.74	0.45	2.85	3.84	3.54	0.2	-0.1	-0.47	1.8
GENE1793X	83666	" PARP9 -  Poly (ADP-ribose) polymerase family, member 9"	1	0.29	-0.19	0.16	-0.28	0	-1.21	-0.58	-0.11	-0.4	-0.72	-0.68	-1.5	-0.25	-0.34	-0.32	0.14	-0.47	-1	-0.09	-0.69	0.49	0.29	-1	-0.78	-0.06	-0.63	-0.75	-0.03	0.62	2.03	2.01	0.04	0.16	0.02	0.33
GENE982X	5699	" PSMB10 -  Proteasome (prosome, macropain) subunit, beta type, 10"	1	-0.21	-0.46	0.03	0.4	0.23	-1.59	-1.49	-0.42	-0.05	-0.14	-1.31	-1.87	-0.51	-0.6	-0.71	-0.72	-0.58	-1.82	0.31	0.27	-0.07	-0.37	-1.5	-0.62	0.25	-0.51	-0.39	-0.91	0.18	1.41	1.9	-0.48	-0.3	-0.57	-0.18
GENE1189X	6357	 CCL13 -  Chemokine (C-C motif) ligand 13	1	0.54	-0.37	0.1	-0.12	-0.16	-0.87	-0.86	0.79	0.06	-0.67	-0.03	-0.13	-0.9	-0.88	0.33	0.59	-0.82	-1.63	0.36	-0.26	-0.23	0.13	-0.01	-0.11	0.31	0.4	0.09	0.15	3.43	2.82	2.37	0.09	-0.1	0.22	0.01
GENE401X	3433	 IFIT2 -  Interferon-induced protein with tetratricopeptide repeats 2	1	0.54	0.21	0.67	-0.66	-0.54	-0.16	-0.55	0.44	0.33	-0.39	-0.02	-0.02	0.49	-0.12	-0.54	0.25	-0.51	-0.52	-0.16	-0.57	0.33	0.4	-0.6	-0.2	0.23	0.15	0.26	0.46	3.33	3.42	2.37	0.32	-0.2	1.65	1.59
GENE1451X	767	 CA8 -  carbonic anhydrase VIII	1	0.4	-0.26	0.54	-0.36	-0.3	-0.5	0.01	-0.48	-0.73	-0.59	-0.42	-0.12	-0.43	-0.14	-1.12	-1.27	-0.52	-0.45	0.28	0.35	-0.34	-0.28	-0.75	-0.16	-0.54	-0.69	0.51	0.4	1.71	2.23	2.12	0.12	-0.57	-0.6	1.98
GENE939X	23586	 DDX58 -  DEAD (Asp-Glu-Ala-Asp) box polypeptide 58	1	0.61	0.17	0.06	-0.47	-0.35	-0.65	-0.41	-0.27	-0.51	-0.05	-0.06	-0.08	-0.23	-0.03	-0.21	0.01	-0.6	0.07	0.35	0.24	-0.21	-0.37	-0.54	0.09	0.45	0.18	-0.16	0.01	1.82	2.38	1.37	0.37	0.22	-0.19	0.78
GENE769X	27253	 PCDH17 -  Protocadherin 17	1	0.4	-0.1	0.25	-0.69	0.13	-0.11	-0.31	-0.11	0.1	-0.31	0.18	-0.33	0.14	-0.34	-0.45	-0.5	-0.53	-1.57	-0.15	0.51	0.07	-0.43	-0.13	0.38	0.43	-0.52	0.27	0.25	1.5	2.17	2.24	-0.44	-0.56	0.2	0.6
GENE1055X	5173	 PDYN -  Prodynorphin	1	0.81	-0.34	-0.11	-0.29	-0.05	-0.23	-0.22	-0.38	-0.28	-0.3	-0.01	-0.65	-0.55	-0.44	-0.36	-0.29	-0.38	-0.34	0.54	-0.41	0.29	-0.43	-0.14	0	-0.32	-0.6	0.09	0.04	1.68	1.73	1.83	0.29	0.25	-0.25	0.09
GENE240X	57168	 ASPHD2 -  Aspartate beta-hydroxylase domain containing 2	1	0.08	-0.23	-0.13	0.14	0.14	0.22	0.37	-0.05	-0.22	-0.28	0.34	-0.04	-0.01	-0.41	-0.53	-0.86	-0.44	-0.56	0.37	0.15	0.01	-0.52	-0.72	0.71	0.38	-0.06	-0.34	-0.59	2.75	3.25	3.11	-0.64	-0.48	-0.05	0.82
GENE115X	9122	" SLC16A4 -  Solute carrier family 16, member 4 (monocarboxylic acid transporter 5)"	1	-0.16	-0.03	0.31	0.01	-0.13	-0.02	-0.14	-0.75	-0.51	-0.56	-0.04	-0.25	-0.28	-0.23	-0.75	-0.53	-0.33	-0.23	0.36		-0.04	-0.31		-0.87	0.14	-0.09	-0.2	-0.3	1.59	1.75	1.78	-0.46	-0.59	-0.31	-0.33
GENE1084X	261729	 STEAP2 -  Six transmembrane epithelial antigen of the prostate 2	1	-0.28	-0.07	0.47	-0.12	-0.01	0.53	0.16	-0.35	-0.11	0.12	-0.01	-0.55	-0.03	-0.12	-0.11	-0.17	0.15	-0.14	0.48	-0.25	-0.03	-0.19	0.04	0.44	0.1	0.15	-0.45	0.58	1.58	2.27	2.39	-0.23	-0.39	-0.45	-0.33
GENE1778X	7033	 TFF3 -  Trefoil factor 3 (intestinal)	1	-0.31	0.02	0.36	0	-0.05	-0.04	-0.25	-0.06	-0.29	-0.04	-0.33	-0.39	-0.24	-0.23	-0.57	-0.3	-0.31	-0.29	0.29	0.87	-0.7	-0.45	0.71	0.73	0.5	0.44	1.03	1.64	2.36	2.44	2.13	0.53	0.06	0.88	0.98
GENE730X	5321	" PLA2G4A -  Phospholipase A2, group IVA (cytosolic, calcium-dependent)"	1	-0.28	0.05	0.35	0.06	-0.16	0.4	1.07	-0.22	-0.38	0.18	-0.25	-1.06	0.88	0.83	0.15	-0.69	0.06	-0.56	-0.02	0.48	-0.35	-0.1	2.25	-0.39	-0.43	0.48	0.66	1.32	0.7	2.95	2.74	0.06	-0.35	0.24	1.39
GENE1866X	7424	 VEGFC -  Vascular endothelial growth factor C	1	0.26	0.26	0.22	-0.36	-0.37	1.77	1.68	-0.28	0.01	0.29	1.56	1.23	0.16	0.77	-0.43	-0.21	0.38	0.82	0.16	-0.38	0	0.21	1.22	0.57	0.04	0.71	1.69	1.83	0.82	2.36	2.32	0.61	0.51	0.86	1.14
GENE203X	6364	 CCL20 -  Chemokine (C-C motif) ligand 20	1	0.14	0.28	0.38	-0.57	-0.23	4.98	4.13	0.55	0.5	2.99	2.23	1.49	0.35	0.44	0.81	0.89	1.66	0.38	-0.49	0.16	-0.1	0.27	5.65	2.66	-0.26	1.13	4.57	4.73	2.73	7.25	10.2	1.26	1.22	4.01	3.1
GENE1475X	10475	 TRIM38 -  Tripartite motif-containing 38	1	-0.37	-0.1	0.21	0.36	-0.08	0.28	0.07	-0.38	-0.84	-0.21	0.05	0.38	0.08	-0.18	-0.47	-0.33	0.09	0.61	0.45	-0.44	-0.27	0.25	1.25	0.63	-0.3	0.04	-0.29	0.18	-0.57	1.85	2.57	-0.04	-0.19	-0.79	0.12
GENE907X	3575	 IL7R -  Interleukin 7 receptor	1	-0.18	0.53	-0.1	0.07	-0.33	0.18	-0.36	0.32	-0.31	0.75	1.38	0.45	-0.55	-1.31	-0.04	-0.2	0.11	0.33	-0.01	-0.71	0.33	0.39	2.11	0.46	-0.27	0.17	-0.09	0.74	-0.27	3.05	3.47	0.29	0.01	-0.05	0.87
GENE399X	272	 AMPD3 -  Adenosine monophosphate deaminase 3	1	-0.9		0.04	0.41	0.46	0.27	-0.28	0.2	0.4	0.24	0.26	-0.14	0.56	-0.26	0.14	0.56	0.57	0.93	-0.17	0.1	-0.07	0.13	2.11	1.72	0.04	0.64	0.35	2.46	1.26	1.66	3.57	-0.04	0.11	0.55	1.48
GENE1514X	4688	 NCF2 -  Neutrophil cytosolic factor 2	1	-0.37	-0.21		0.7	-0.12	0.36	0.01		0.02	-0.07	-0.44	-0.04	0.04	-0.11	0.2	0.11	0.12		-0.26	-0.43	-0.14	0.82	1.22	0.81	-0.19		0.95	0.62	1.83	2	2.1	0.46	0.28	-0.34	2.06
GENE496X	7130	" TNFAIP6 -  Tumor necrosis factor, alpha-induced protein 6"	1	-0.33	0.09	0.44	-0.04	-0.17	0.6	0.01	0.08	0.06	0.84	0.63	0.08	1.37	0.44	-0.26	-0.26	0.69	-0.48	0.01	-0.03	-0.34	0.36	2.7	1.11	-0.07	0.63	1.77	1.85	1.39	3.07	3.29	0.35	-0.01	1.45	2.8
GENE1553X	330	 BIRC3 -  Baculoviral IAP repeat-containing 3	1	0.08	0.22	-0.14	-0.14	0.07	1.69	0.68	-0.12	0.12	0.99	0.08	0.73	1.36	0.36	0.08	0.3	0.64	1.64	0.28	-0.07	0.19	-0.4	2.7	2.26	0.4	0.65	1.34	2.78	2.38	4.18	3.92	0.75	1.03	1.23	2.95
GENE847X	3383	 ICAM1 -  Intercellular adhesion molecule 1	1	-0.11	-0.01	0.02	0.08	0.01	0.24	-0.07	0.25	-0.06	0.39	-0.28	-0.11	0.36	0.07	-0.06	-0.05	0.51	0.54	-0.3	-0.19	0.09	0.41	2.87	2.09	0.28	0.96	1.52	2.69	1.8	3.48	4.01	0.76	0.89	1.67	2.56
GENE1868X	3576	 IL8 -  interleukin 8	1	-0.18	-0.12	0.12	0.13	0.05	0.44	0.39	0.08	-0.19	0.16	0.41	-0.02	-0.07	-0.25	0.09	-0.03	0.14	0.3	0.26	-0.4	0.15	-0.1	1.15	1.07	0.1	-0.08	0.84	1.02	1.2	1.86	1.97	0.17	0.23	0.8	0.73
GENE102X	1540	 CYLD -  Cylindromatosis (turban tumor syndrome)	1	0.27	-0.12	-0.16	0.01	-0.01	0.3	-0.13	0.02	0.11	0.02	0.69	0.5	0.21	-0.11	0.09	0.38	0.42	0.8	0.37	-0.14	-0.29	0.06	1.5		-0.04	0.25	1.06	1.71	0.85	2.38	1.92	-0.01	-0.31	0.25	1.39
GENE103X	197259	 MLKL -  Mixed lineage kinase domain-like	1	0.39	-0.73	0.08	0.28	-0.03	1.38	0.34	-0.35	-0.64	-0.59	1.17	0.47	-0.17	0.01	-0.6	-0.47	-0.51	-0.32	0.72	-0.36	0.29	-0.65	0.77		-0.7	-0.65	-0.58	0.21		4.04	3.71	-0.07	-0.56	-0.79	2.27
GENE1850X	3669	 ISG20 -  Interferon stimulated exonuclease gene 20kDa	1	0	0.15	-0.03	-0.11	-0.01	1.63	2.07	0.29	-0.24	-0.03	0.96	1.84	0.25	-0.17	0.01	-0.28	-0.46	-0.12	-0.01	0.08	-0.05	-0.01	2.22	2.95	-0.06	0.03	0.42	2.07	2.51	4.63	4.95	0.15	-0.06	0.14	3.17
GENE1638X	129607	" CMPK2 -  Cytidine monophosphate (UMP-CMP) kinase 2, mitochondrial"	1	0.41	0.07	-0.03	-0.16	-0.3	1.64	0.7	0.25	0.09	-0.01	0.51	0.46	0.6	0.18	0.05	0.22	-0.05	0	0.16	-0.23	-0.12	0.19	2.5	2.99	0.29	0.17	0.45	2.55	1.78	6.27	6.84	0.32	0.42	0.01	5.16
GENE1684X	7453	 WARS -  Tryptophanyl-tRNA synthetase	1	-0.21	0.11	0.02	-0.1	0.19	-0.37	-0.24	0.04	0.06	-0.3	-0.52	0.35	0.2	0.08	-0.67	-0.45	-0.08	-0.12	-0.04	0.15	0.15	-0.25	1.74	2.26	-0.23	-0.58	-0.56	1.24	1.18	3.69	3.75	-0.29	-0.44	-0.53	2.23
GENE1659X	55748	 CNDP2 -  CNDP dipeptidase 2 (metallopeptidase M20 family)	1	-0.1	-0.29	0.21	0.16	0.02	0.02	0.25	0.07	-0.14	-0.5	-0.16	0.16	0.18	0.18	0.11	-0.28	-0.42	-0.22	-0.32	-0.31	0.29	0.35	0.99	1.32	-0.15	-0.19	-0.43	0.84	-0.23	2.24	1.98	0.49	0.25	-0.59	1.9
GENE104X	23555	 TSPAN15 -  Tetraspanin 15	1	-0.06	0.37	-0.79	0.38	0.08	0.34		0.08	0.37	0.55	0.65	1.46	0.28	0.18	0.25	0.47	0.26	1.08	-1.3	-0.18	0.87	0.6	1.17	0.85	0.47	1.43	0.37	1.27	0.59	2.82	3.54	0.88	0.67	0.47	2.13
GENE1230X	55905	 RNF114 -  Ring finger protein 114	1	-0.13	0.11	-0.4	0.4	0.02	0.1	-0.26	0.13	0.09	0.08	0.09	0.23	0.07	0.17	0.15	-0.13	0.3	0.56	-0.29	-0.47	0.35	0.42	0.36	0.41	0.2	0.35	-0.31	0.83	-0.09	2.67	2.73	0.34	-0.01	0.23	1.43
GENE1322X	51667	 NUB1 -  negative regulator of ubiquitin-like proteins 1	1	-0.14	-0.12	0.22	0.08	-0.05	-0.41	-0.08	-0.04	-0.06	-0.05	-0.29	0.92	-0.11	-0.19	0.12	-0.04	-0.03	0.73	-0.01	-0.06	-0.17	0.23	0.14	0.36	0.26	0.23	-0.15	0.28	0.69	1.84	2.25	0.34	0.09	0.14	0.76
GENE790X	9235	 IL32 -  Interleukin 32	1	0.07	0.1	0.51	-0.51	-0.17	-0.1	0.08	-0.14	-0.3	-0.23	0.26	-0.45	-0.25	0.58	-0.02	-0.35	-0.47	-0.17	-0.07	-0.07	-0.41	0.56	0.44	0.34	0.18	0.66	0.75	1.22	1.6	2.97	3.97	1.13	0.55	0.32	0.9
GENE1419X	29798	 C2orf27A -  chromosome 2 open reading frame 27A	1	-0.2	-0.09	0.15	-0.09	0.23	0.09	0.68	0.11	0.17	-0.12	0.61	-0.1	0.07	0.68	-0.11	-0.06	-0.29	0.02	0.09	0.2	0.04	-0.33	-0.21	0.71	0.19	0.02	0.11	0.52	0.51	1.62	2.21	0.42	0.4	0.46	0.8
GENE670X	54464	 XRN1 -  5'-3' exoribonuclease 1	1	0.2	0.07	-0.22	0.22	-0.26	0.42	0.71	-0.28	-0.26	-0.3	0.73	2.63	0.2	-0.36	-0.08	0.04	-0.33	1.52	0.16	-0.01	0.27	-0.43	0.98	0.77	0.51	-0.47	-0.74	1.44	1.17	3.48	3.41	0.44	-0.05	-0.25	2.88
GENE1764X	4938	" OAS1 -  2',5'-oligoadenylate synthetase 1, 40/46kDa"	1	-0.18	-0.07	-0.18	0.3	0.15	0.39	0.5	0.2	0.4	0.34	-0.04	0.5	0.25	0.6	0.39	0.22	0.45	1.16	0.28	-0.47	0	-0.05	0.69	0.49	0.18	0.03	0.41	0.48	1.1	1.88	2.16	-0.59	-0.54	0.35	1.43
GENE1164X	2643	 GCH1 -  GTP cyclohydrolase 1	1	-0.22	-0.14	-0.13	0.16	0.33	1.04	0.68	0.34	0.47	0.91	1.34	0.69	0.7	0.03	-0.3	0.18	0.94	-0.27	-0.09	0.99	-0.08	-0.33	0.63	1.56	-0.18	0.75	1.14	0.13	1.09	3.4	4.04	-0.06	0.19	0.95	3.04
GENE105X	5552	 SRGN -  Serglycin	1	-0.36	-0.03	-0.42	0.38	0.44	0.96	1.12	0.33	0.27	0.51	0.9	0.63	-0.08	-0.58	-0.79	-0.23	-0.18	-1.26		0.36	0.04	-0.41	0.32	0.14	-0.19	-0.32	-0.53	-0.96		1.83	4.48	-0.99	-1	0.33	1.72
GENE344X	6318	" SERPINB4 -  Serpin peptidase inhibitor, clade B (ovalbumin), member 4"	1	0.64	0.42	-0.6	-0.23	-0.25	-0.12	0.44	0.55	-0.11	0.03	0.13	-0.26	0.04	0.14	0.77	-0.25		-0.14		0.01	-0.18	0.18	0.67	0.4	-0.54	-0.16	-0.1	1.26	-0.37	1.96	6.72	0.61	0.62	-0.51	1.43
GENE338X	8942	 KYNU -  Kynureninase (L-kynurenine hydrolase)	1	-0.19	-0.37	0.15	0.3	0.12	0	-0.63	0.02	-0.52	-0.47	-1.37	-0.67	0.73	-0.07	-0.06	-0.47	-0.28	0.55	-0.62	0.91	-0.11	-0.19	1.05	0.2	-0.09	0.45	0.73	1.04	-0.15	2.47	3.94	0.83	0.7	-0.05	1.77
GENE841X	5721	" PSME2 -  Proteasome (prosome, macropain) activator subunit 2 (PA28 beta)"	1	-0.19	-0.23	-0.11	0.29	0.12	-0.94	-0.58	0.12	-0.08	-0.25	-0.87	-0.88	-0.27	-0.55	-0.27	-0.34	-0.28	-1.4	1.05	0.2	-0.12	-0.5	-0.6	0.16	0.34	0.07	-0.28	-0.34	-1.4	2.23	2.3	0.1	-0.11	-0.14	0.57
GENE1503X	6891	" TAP2 -  Transporter 2, ATP-binding cassette, sub-family B (MDR/TAP)"	1	-0.23	-0.05	0.16	0.05	0.07	-0.15	0.18	0.19	0.3	0.39	-0.18	-1.06	0.32	0.05	-0.11	-0.2	0.05	-0.54	-0.02	0.26	0.26	-0.5	-0.58	-0.25	-0.19	-0.6	-0.3	-0.64	-1.02	1.96	1.95	-0.22	-0.36	-0.34	0.17
GENE1433X	10630	 PDPN -  Podoplanin	1	0.12	-0.46	0.52	-0.23	-0.18	0.17	0.44	0.71	-0.26	0.25	-0.26	-0.58	0.19	0.56	0.04	-0.46	0	-0.06	0.19	-0.65	0.11	0.35	-0.77	-1.14	0.42	0	-0.47	-0.97	-2.1	1.5	2.23	0.23	0.09	-0.22	0.19
GENE948X	8519	 IFITM1 -  Interferon induced transmembrane protein 1 (9-27)	1	0.11	0	0.11	-0.2	-0.02	-0.35	-0.82	-0.01	-0.3	-0.31	-0.36	-1.15	-0.38	-0.06	-0.19	-0.31	-0.16	-0.7	0.19	-0.06	0.11	-0.22	-0.69	-1.94	0.21	-0.09	-0.3	-1.06	-2.81	2.86	3.37	0.09	-0.07	-0.01	-0.3
GENE1091X	8542	" APOL1 -  Apolipoprotein L, 1"	1	-0.3	-0.02	0.68	-0.02	-0.35	0.08	-0.34	-0.37	-0.2	-0.39	-0.29	-0.31	0.23	0.44	0.35	-0.63	-0.61	-0.15	1.14	-0.46	-0.68	0.01	-0.81	-1.32	0.2	0.05	-0.39	-0.79	-1.62	3.14	3.2	0.56	0.05	-0.15	0.38
GENE110X	58472	 SQRDL -  Sulfide quinone reductase-like (yeast)	1	-0.17	0.04	-0.14	0.26		0.52	0.59	0.08	0.02	0	-0.47	-0.14	0.07	-0.14	0.03	-0.07	-0.13	0.21	0.23	-0.09	-0.19	0.05	-0.43		0.19	0.08	-0.28	-0.47	-1.93	1.91	2.34	0.12	-0.28	-0.01	1.39
GENE1267X	5683	" PSMA2 -  Proteasome (prosome, macropain) subunit, alpha type, 2"	1	-0.24	-0.07	0.1	0.15	0.05	0.3	0.86	0.06	-0.1	-0.13	-0.33	0.38	-0.07	-0.1	0.11	-0.3	-0.24	-0.43	0.2	-0.09	-0.01	-0.11	-0.31	-0.42	0.15	0.52	-0.12	-0.22	-1.3	1.8	2.1	0.37	-0.22	-0.14	-0.02
GENE914X	3133	" HLA-E -  major histocompatibility complex, class I, E"	1	-0.38	-0.23	0.19	0.28	0.14	0.92	0.14	0.29	0.09	0.27	0.55	-0.64	-0.27	-0.4	0.11	-0.15	0.06	-0.56	0.23	-0.17	-0.08	0.02	0.03	-0.36	0.02	-0.04	-0.15	-0.29	-1.83	2.08	2.14	0.13	-0.17	-0.15	0.31
GENE1362X	6993	" DYNLT1 -  Dynein, light chain, Tctex-type 1"	1	-0.27	-0.2	-0.02	0.33	0.17	1.02	1.35	-0.2	-0.39	-0.06	0.39	-0.28	0.58	0.72	-0.03	-0.39	-0.35	-0.21		-0.22	-0.12	0.35	0.38	0.01	0.13	0.25	-0.1	-0.39	-2.27	2.08	2.57	0.32	-0.17	-0.15	-0.47
GENE1324X	85441	 PRIC285 -  Peroxisomal proliferator-activated receptor A interacting complex 285	1	-0.15	0.09	0.28	-0.14	-0.09	1.37	1.74	0.03	-0.41	0.01	1.03	1.35	0.57	0.81	0.7	-0.4	-0.22	0.75	-0.33	-0.5	-0.01	0.85	0.79	0.22	0.28	0.36	0.26	0.32	0.08	3.81	4.04	-0.33	0.44	0.09	2.24
GENE1683X	25865	 PRKD2 -  Protein kinase D2	1	-0.39	0.05	0.39	0.01	-0.05	0.31	0.59	0.08	-0.42	-0.09	0.07	0.4	0.38	0.07	0.26	-0.69	-0.08	1.13	-0.26	-0.49	0.21	0.53	0.28	0.45	0.01	0.06	0.01	0.14	-0.38	2.25	2.16	0.36	0.23	-0.3	1.88
GENE1589X	84955	 NUDCD1 -  NudC domain containing 1	1	-0.21	-0.2	0.4	0.19	-0.2	0.61	0.55	0.18	-0.62	-0.7	0.12	0.01	0.37	0.61	0.19	-0.7	-0.33	0.7	-0.12	-0.73	0.53	0.31	0.9	0.44	-0.23	-0.22	-0.01	0.42	-0.36	2.79	2.66	0.25	0.17		2.45
GENE1792X	56829	" ZC3HAV1 -  Zinc finger CCCH-type, antiviral 1"	1	-0.3	-0.13	0.5	0.05	-0.13	-0.11	0.53	0.02	-0.39	-0.36	0.4	0.54	0.43	0.2	0.1	-0.29	-0.19	0.46	-0.2	-0.29	0.09	0.4	-0.35	-0.69	-0.05	0	-0.26	-0.39	-1.26	2.58	2.24	0.43	0.09	0.38	2.67
GENE1257X	10561	 IFI44 -  Interferon-induced protein 44	1	-0.77	-0.02	0.9	-0.37	0.26	0.21	-1.01	1.03	0.61	-0.59	-0.39	-1.71	1.61	1.03	-0.98	-0.94	-0.39	0.53	0.07	0.59	-0.31	-0.36	-0.27	-0.23	-0.69	-0.73	-1.2	-0.35	0.3	3.98	3.97	-0.86	-1.41	0.38	3.13
GENE1823X	7412	 VCAM1 -  Vascular cell adhesion molecule 1	1	0.26	0.43	0.19	-0.33	-0.56	0.81	0.62	0.26	0	1.19	0.34	0.56	-0.04	0.5	-0.06	-0.31	-0.01	0.18	0.01	0.1	-0.37	0.31	-0.29	-0.61	-0.41	0.22	1.18	-0.1	1.39	4.34	3.99	0.27	-0.08	1.57	2.31
GENE854X	3627	 CXCL10 -  Chemokine (C-X-C motif) ligand 10	1	-0.03	-0.48	0.59	-0.25	0.17	1.47	0.1	-0.3	-0.65	-0.02	-0.56	-0.29	0.18	-0.4	-0.19	-0.08	-0.38	-0.47	-0.18	0.15	-0.08	0.11	0.13	0.47	-0.22	-0.39	0.11	-0.09	1.23	6.28	5.81	-0.34	0.34	3.36	6.36
GENE1422X	161145	 TMEM229B -  Transmembrane protein 229B	1	-0.11		0.1	0.11	-0.09	-0.8	-0.61	0.25	-0.42	-0.68	-0.76	-0.51	0.04	-0.09	0.11	-0.47	-0.83	-0.62	-0.14	0.32	-0.17	-0.01	-1.16	-0.61	0.12	-0.47	-0.44	-0.47	0.67	1.58	3.02	0.12	-0.31	-0.51	2.06
GENE400X	151636	 DTX3L -  Deltex 3-like (Drosophila)	1	-0.18	-0.12	0.21	0.28	-0.18	-0.31	0.06	-0.04	-0.49	-0.94	-0.65	-1.98	0.54	0.55	0.07	-0.35	0.19	-0.1	0.24	-0.18	-0.13	0.08	-2.36	-0.95	0.08	-0.08	-1.21	-1.47	0.61	2.49	2.96	0.05	-0.51	-0.64	0.01
GENE1372X	80833	" APOL3 -  Apolipoprotein L, 3"	1	-0.01	-0.26	0.23	0.05	0	0.61	0.07	-0.06	-0.5	-0.87	-0.03	-0.23	0.81	0.22	-0.32	-0.33	-0.29	0.18	0.22	-0.04	0.25	-0.44	-1.46	-0.83	0.34	0.3	-0.65	-0.46	0.37	2.44	2.49	0.01	-0.16	-0.08	0.53
GENE1847X	3660	 IRF2 -  interferon regulatory factor 2	1	0.23	-0.16	-0.01	0.08	-0.14	-0.32	-0.4	-0.22	-0.49	-0.19	-0.32	-0.32	0.86	0.49	-0.01	-0.03	0.08	0.48	0.51	-0.04	-0.04	-0.45	-1.79	-1.34	0.14	-0.34	-0.9	-0.97	-0.12	2.48	2.02	-0.05	-0.39	-0.64	1.18
GENE1867X	2633	" GBP1 -  Guanylate binding protein 1, interferon-inducible, 67kDa"	1	-0.42	-0.13	0.39	0.18	-0.11	-0.46	-0.14	-0.14	-0.19	-0.19	-0.61	-0.44	1.23	1.15	0.08	-0.06	0.25	-0.54	0.07	-0.73	0.17	0.31	-2.43	-2.3	0.2	0.27	-0.24	-1.82	-1.07	4.89	5.26	0.14	-0.04	0.92	2.99
GENE1179X	3434	 IFIT1 -  Interferon-induced protein with tetratricopeptide repeats 1	1	0.17	0.06	0.59	-0.38	-0.44	0	0.17	-0.62	-0.17	-0.53	-0.32	-0.78	1.67	0.5	0.28	-0.36	1.12	-0.25	0.18	-0.01	0.06	-0.22	-3.93	-3.67	-0.12	-0.43	-1.54	-3.85	-2.81	5.42	5.87	0.22	-0.37	2.08	2.81
GENE1716X	57552	 NCEH1 -  Neutral cholesterol ester hydrolase 1	1	0.19	-0.28	0.05	0.02	0.03	-0.01	-0.14	0.09	-0.16	-0.48	-0.39	-0.45	0.19	0.64	-0.17	0.31	0.15	0.46	0.12	-0.56	0.6	-0.14	-1.07	-1.06	0.09	0.09	0.35	0.1	0	2.75	2.88	0.69	0.88	0.03	2.44
GENE512X	8989	" TRPA1 -  transient receptor potential cation channel, subfamily A, member 1"	1	-0.21	0.08	-0.09	-0.08	0.28	-0.13	0.03	-0.65	0.78	-0.52	0.84	-0.49	-0.1	0.43	-1.14	0.15		-0.91	0.82	0.23	0.49	-1.54	-1.97	-0.25	0.38	-0.88	0.27	1.38	3.32	6.16	6.85	0.69	0.17	1.17	4.01
GENE1849X	8743	" TNFSF10 -  Tumor necrosis factor (ligand) superfamily, member 10"	1	-0.17	-0.11	0.01	0.16	0.1	-0.2	-0.07	0.04	0.03	-0.04	0.2	-0.2	-0.28	-0.03	0.06	0.05	0.27	-0.14	0.02	0.43	-0.2	-0.25	-0.28	-0.34	0.25	0.09	0.14	0.54	2.49	6.19	6.4	0.67	-0.04	0.12	2.95
GENE1832X	11274	 USP18 -  Ubiquitin specific peptidase 18	1	-0.3	-0.2	0.24	-0.27	0.53	0.39	-0.02	-0.37	0.09	-0.06	0.24	-0.14	0.49	0.29	-0.25	0.08		-0.51	-0.04	0.6	0.26	-0.82	-0.96	-0.44	0.12	-0.03	0.19	0.25	0.43	5.08	4.8	-0.19	-0.04	0.12	2.87
GENE1831X	3620	" IDO1 -  Indoleamine 2,3-dioxygenase 1"	1	-0.11	-0.08	0.29	-0.11	-0.01	0.66	0.72	-0.28	0.15	0.4	0.5	-0.05	0.88	0.97	-0.14	-0.05	0.45	1.44	0.05	-0.1	-0.14	0.19	-0.43	-1.14	-0.32	0	0.12	-0.5	-0.31	4.46	5.17	0.43	-0.29	-0.22	2.96
GENE1813X	5359	 PLSCR1 -  Phospholipid scramblase 1	1	-0.28	0.08	0.12	-0.09	0.17	0.07	-0.28	-0.25	-0.09	-0.5	-0.75	0.42	0.42	0.04	-0.03	-0.41	-0.62	0.59	-0.14	0.07	-0.05	0.12	0.19	0.31	0.04	-0.23	-0.43	-0.14	-0.57	3.74	3.85	-0.12	-0.15	-0.24	1.96
GENE1787X	10964	 IFI44L -  Transcribed locus	1	-0.12	0.29	0.07	-0.26	0.03	0.24	0.05	0.08	0.01	-0.14	0.6	-0.31	0.57	0.39	0.73	0	-0.19	0.18	-0.13	-0.01	-0.22	0.36	0.05	0.12	0.09	-0.05	-0.21	-0.02	0.2	5.62	6.03	0.41	0.12	0.07	2.89
GENE1851X	4599	" MX1 -  Myxovirus (influenza virus) resistance 1, interferon-inducible protein p78 (mouse)"	1	-0.02	-0.14	0.16	-0.02	0.03	-0.35	-0.45	-0.02	-0.02	-0.3	-0.23	-0.45	1.05	0.15	0.08	0.07	-0.01	0.06	0.23	-0.19	-0.3	0.26	-0.45	-0.32	0.24	-0.11	-0.31	-0.07	0.67	3.42	3.52	0.12	-0.4	-0.1	2.61
GENE114X	9420	" CYP7B1 -  cytochrome P450, family 7, subfamily B, polypeptide 1"	1	0.07	0.11	-0.2	0.03	-0.03		-0.54	-0.29	-0.02	-0.16	0.23	-0.22	0.09		0.35	-0.23	0.18	-0.39	0.77	-0.5	-0.32	0.06	0.02	-0.29	0.1	-0.18	-0.01	-0.57	0.09	3.22	3.72	-0.2	0	0.07	3.32
GENE1386X	54739	 XAF1 -  XIAP associated factor 1	1	-0.3		0.34	0.03	-0.06	-0.37	-0.5	-0.13	-0.37	-0.44	-0.05	-0.75	0.72	0.05	-0.19	-0.35	-0.02	0	0.42	-0.5	-0.08	0.17	-0.17	0.41	-0.24	-0.15	-0.63	-0.26	1.14	3.2	3.41	0.15	-0.51	-0.03	1.3
GENE1613X	6890	" TAP1 -  Transporter 1, ATP-binding cassette, sub-family B (MDR/TAP)"	1	-0.2	0.04	-0.1	0.21	0.05	-1.06	-0.76	-0.3	-0.33	-0.66	-0.99	-1.12	0.76	0.04	-0.42	-0.53	-0.55	0.33	-0.1	-0.01	-0.24	0.35	-0.25	0.27	-0.18	-0.19	-0.45	-0.42	0.55	2.56	2.61	-0.4	-0.53	-0.01	1.3
GENE761X	2720	" GLB1 -  Galactosidase, beta 1"	1	-0.35	-0.03	0.21	0.18	0.01	-1.22	-1.02	0.23	-0.28	-0.09	-1.43	-1.66	-0.17	0.06	0.02	-0.56	-0.19	0.1	-0.06	-0.66	0.28	0.45	0.55	-0.87	-0.15	-0.02	-0.35	-0.27	-2.04	3.29	3.71	0.26	0.15	-0.37	1.05
GENE1862X	4939	" OAS2 -  2'-5'-oligoadenylate synthetase 2, 69/71kDa"	1	-0.22	-0.22	0.22	0.07	0.11	-0.56	-0.41	0.04	-0.06	-0.01	-0.45	-0.38	0.97	0.49	-0.09	0.04	-0.31	-0.17	0	-0.31	-0.03	0.34	-0.18	-0.35	0.27	0.27	-0.02	-0.06	0.17	2.79	2.78	0.35	0.55	0.14	0.88
GENE113X	64108	 RTP4 -  Receptor (chemosensory) transporter protein 4	1	-0.36		0.15	0.12	0.08	-1.24	-1.15	0.07	0.32			-1.58	0.39	0.09	0.28	-0.11	-0.18	-1.2	0.22	0.18	-0.51	0.1	-1.2	-0.06	0.25	-0.03	-0.24	-0.37	0.85	5.01	5.26	0.29	-0.39	0.03	0.6
GENE1846X	4005	 LMO2 -  LIM domain only 2 (rhombotin-like 1)	1	-0.28	0.12	0.1	-0.09	0.15	-1.48	-1.66	-0.16	0.24	0.17	-1.05	-1.44	-0.18	0.67	-0.04	0.19	-0.21	-1.02	-0.03	-0.41	0.32	0.12	0.34	0.57	0.03	-0.08	0.04	0.04	0.05	3.77	4.19	0.17	0.04	-0.23	1.85
GENE1752X	3430	 IFI35 -  Interferon-induced protein 35	1	-0.21	-0.1	0	0.23	0.08	-1.24	-0.57	-0.14	-0.36	-0.62	-0.82	-1.39	0.17	0.05	0.04	-0.25	-0.39	-0.97	-0.01	0.06	-0.2	0.15	0.03	-0.17	-0.12	0.35	0.2	0.27	-0.76	3.35	3.61	0.41	0.02	-0.23	1.58
GENE1807X	10437	" IFI30 -  Interferon, gamma-inducible protein 30"	1	-0.15	-0.19	-0.06	0.1	0.28	-0.73	-0.03	0.14	0.13	-0.23	-0.67	-0.46	-0.01	-0.14	0.05	0.03	-0.11	-0.7	0.15	-0.16	-0.08	0.1	-0.42	-0.45	0.08	-0.02	-0.19	-0.69	-1.36	2.08	2.23	0.02	-0.34	-0.12	0.21
GENE1647X	87178	 PNPT1 -  Polyribonucleotide nucleotidyltransferase 1	1	-0.34	0.23	0.21	0.02	-0.1	-0.26	-0.05	-0.28	-0.27	-0.16	-1.02	-0.97	0.16	0.03	-0.18	-0.44	-0.07	-0.54	0.27	-0.33	0.26	-0.19	-0.35	-0.24	0.18	-0.07	-0.08	-1.47	-1.73	2.7	3.4	0.06	-0.18	0.24	1.06
GENE1600X	10384	" BTN3A3 -  Butyrophilin, subfamily 3, member A3"	1	-0.17	-0.12	-0.26	0.34	0.22	-1.4	-0.57	0.04	-0.14	-0.53	-1.12	-1.23	0.56	0.19	-0.06	-0.53	-0.37	0.21	-0.14	-0.01	0.16	-0.01	-0.58	-0.01	-0.41	-0.63	-0.9	-1.22	-1.18	1.94	2.8	-0.42	-0.34	-0.6	1.1
GENE112X	4940	" OAS3 -  2'-5'-oligoadenylate synthetase 3, 100kDa"	1	-0.21	-0.24	0.03	0.43	-0.02	-1.55	-0.71	0.03	0.16	-0.55	-1.08	-2.73	1.88	0.76	-0.1	-0.5	-0.26	-0.7	-0.09	0.1	-0.36	0.35	-1.69		-0.29	-0.52	-1.19	-2.12		4.24	4.59	-0.56	-0.68	-0.12	2.03
GENE1858X	3431	 SP110 -  SP110 nuclear body protein	1	0.14	-0.11	-0.06	-0.03	0.06	-1.55	-1.14	-0.07	-0.25	-0.51	-1.04	-1.84	-0.08	0.12	0.06	-0.17	-0.35	-0.51	0.12	-0.38	0.17	0.09	-1.54	-1.83	-0.1	-0.09	-0.5	-1.12	-1.29	2.91	2.73	0.25	-0.2	-0.47	0.77
GENE1860X	60489	" APOBEC3G -  apolipoprotein B mRNA editing enzyme, catalytic polypeptide-like 3G"	1	-0.1	-0.09	0.19	-0.02	0.01	-1.74	-1.51	-0.33	-0.56	-0.76	-1.35	-1.8	-0.14	-0.11	-0.45	-0.88	-0.77	-0.3	-0.03	-0.1	0.03	0.09	-0.73	-1.02	-0.17	-0.27	-0.38	-0.77	-1.13	2.89	2.86	0.26	-0.1	-0.7	1.09
GENE1630X	55008	 HERC6 -  Hect domain and RLD 6	1	0.15	-0.18	0.27	-0.13	-0.11	-1.65	-0.61	0.08	-0.54		-1.59	-1.27	0	-0.2	-0.15	0.4	-0.22	-0.48	-0.05	-0.88	0.62	0.31	-0.56	-0.69	-0.25	-0.12	-0.44	-0.44	-0.81	5.36	5.56	0.44	0.2	-0.19	3.19
GENE1871X	2634	" GBP2 -  Guanylate binding protein 2, interferon-inducible"	1	0.17	-0.4	0.31	0.15	-0.23	-1.34	-1.28	-0.06	0.08	-0.07	-0.35	-0.53	0.68	0.14	-0.36	0.14	0.12	-0.62	0.04	-0.13	-0.07	0.13	-1.09	-1.25	-0.21	-0.15	-0.29	-1.05	-0.72	4.32	4.42	0.21	0.01	0.76	1.82
GENE1746X	54625	" PARP14 -  poly (ADP-ribose) polymerase family, member 14"	1	-0.12	-0.01	-0.26	0.15	0.23	-0.97	-0.63	0.11	-0.19	-0.54	-0.69	-1.09	0.83	-0.26	-0.26	-0.19	-0.26	-0.12	0.1	0	0.22	-0.33	-1.2	-0.5	-0.12	-0.63	-0.59	-1.03	-0.92	3.4	3.09	-0.01	-0.05	0.19	1.82
GENE1449X	4600	 MX2 -  Myxovirus (influenza virus) resistance 2 (mouse)	1	-0.01	0.09	-0.15	0.12	-0.05	-0.8	-0.83	0.06	-0.19	-0.4	-0.81	-1.1	1.15	-0.1	-0.16	0.13	-0.27	-0.65	0.14	-0.55	0.09	0.33	-1.77	-1.34	0.05	-0.51	-0.94	-0.95	-2.26	4.43	4.59	0.24	-0.64	-0.19	3.23
GENE1839X	5610	 EIF2AK2 -  Eukaryotic translation initiation factor 2-alpha kinase 2	1	0.26	-0.06	0.11	-0.22	-0.09	-0.44	0.23	0.09	-0.06	0.13	-0.28	-0.68	0.35	0.09	-0.08	0.02	-0.06	0.4	0.17	-0.22	0.43	-0.38	-0.71	-0.77	-0.07	0.01	-0.77	-0.22	-0.81	2.59	2.72	0.51	0.1	-0.31	1.72
GENE1323X	9636	 ISG15 -  ISG15 ubiquitin-like modifier	1	-0.1	-0.02	-0.15	0.34	-0.08	0.26	0.67	0.01	-0.13	-0.18	-0.2	-0.1	0.95	0.12	-0.34	-0.4	-0.34	-1.26	0.41	-0.67	0.28	-0.03	-1.39	-1.16	0.39	-0.38	-0.75	-1.52	-1.73	5.42	6.3	0.29	-0.15	1.1	2
GENE1863X	629	 CFB -  Complement factor B	1	0.11	-0.15	0.26	-0.32	0.1	0.43	0.45	0.05	-0.05	0.01	0.18	0.01	-0.2	-0.09	-0.57	-0.36	-0.37	-0.52	0.16	-0.12	0.08	-0.1	-0.25	-0.22	0.12	-0.34	-0.47	-0.22	-0.87	2.94	4	0.04	0.09	0.41	1.16
GENE111X	5920	 RARRES3 -  Retinoic acid receptor responder (tazarotene induced) 3	1	-0.77	-0.33	0.62	-0.19	0.68	-0.42	-0.39	0.02	-0.14	-0.04	-0.23	-0.65	-0.65	0.22	-0.14	-0.86	-0.77	-0.79	-0.61	0.93	-0.5	0.17	-0.29		0.16	0.09	0.06	-0.64	-0.79	4.08	4.16	0.31	-0.38	-0.22	2.58
GENE1491X	219285	 SAMD9L -  Sterile alpha motif domain containing 9-like	1	0.42		-0.08	-0.12	-0.22	-0.29	-0.29	0.19	-0.25	-0.04	-1.02	-0.09	0.15	-0.44	-0.12	0.04	-0.42	-0.19	0.17	-0.48	0.57	-0.26	-1.47	-1.21	0.29	-0.54	-0.09	0.83	-0.97	5.02	4.8	1.16	0.82	1.16	2.56
GENE1670X	4654	 MYOD1 -  Myogenic differentiation 1	1	-0.04	0.04	0.56	-0.56	0.02	0.74	0.77	0.37	-0.1	0.2	0.11	-0.15	-0.21	0.63	0.3	-0.21	0.47	-0.62	-0.72	-0.22	0.44	0.5	0.86	0.29	-0.03	0.39	0.39	1.09	0.38	3.92	4.73	1.13	1.06	0.07	2
GENE1815X	9447	 AIM2 -  Absent in melanoma 2	1	-0.14	-0.13	0.3	-0.12	0.04	0.6	0.16	0.02	-0.12	-0.45	-0.11	-0.13	-0.46	-0.09	-0.05	-0.05	-0.26	-0.43	-0.09	-0.12	-0.02	0.2	0.48	-0.16	-0.25	0.06	0.3	0.25	0.32	2.66	3.19	0.31	-0.03	-0.08	0.58
GENE1312X	2537	" IFI6 -  Interferon, alpha-inducible protein 6"	1	-0.02	-0.25	0.49	-0.21	-0.01	0.45	0.88	-0.25	-0.19	-0.11	0.22	-0.1	-0.06	-0.05	-0.03	-0.27	0.04	-0.51	0.15	-0.41	0.09	0.18	0.26	-0.07	0.15	0.26	0.12	0.29	-0.62	2.54	3.14	0.41	-0.02	0.37	0.55
GENE1530X	23037	 PDZD2 -  PDZ domain containing 2	1	-0.09	0.44	0.24	-0.52	-0.06	0.25	0.16	-0.38	-0.23	0.19	0.45	-0.55	-0.16	-0.02	-0.46	-0.31	0.25	-0.83	0.16	0.53	-0.22	-0.47	-0.09	-0.26	-0.3	0.12	0.13	0.4	0.08	3.49	3.49	-0.01	-0.34	0.14	0.02
GENE1351X	952	 CD38 -  CD38 molecule	1	-0.31	0.15	0.38	0.07	-0.29	0.01	-0.25	-0.11	-0.35	0.35	0.16	-0.18	-0.01	0.17	0.06	-0.59	0.08	0.75	-0.33	0.47	-0.34	0.2	0.14	-0.68	-0.34	0.41	0.56	-0.37	0.25	2.66	3.47	0.33	-0.16	0.29	0.64
GENE1812X	5979	 RET -  Ret proto-oncogene	1	-0.09	0.04	0.26	-0.1	-0.09	0.46	0.74	-0.04	-0.21	0.39	0.46	0.38	0.02	0.19	0.01	-0.25	0.15	0.76	-0.01	0.32	-0.24	0.1	0.16	-0.23	0.15	0.34	0.54	0.25	-0.05	2.52	2.61	0.27	0.39	-0.15	0.19
GENE1429X	8837	 CFLAR -  CASP8 and FADD-like apoptosis regulator	1	-0.18	0.21	-0.11	0.35	-0.22	0.32	0.87	-0.03	-0.11	-0.11	0.18	0.19	0	-0.05	-0.31	-0.28	-0.12	0.78	-0.42	0.08	0.04	0.3	0.02	-0.19	0.24	0.29	0.56	-0.24	0.18	1.9	2.54	0.41	0.44	0.62	0.51
GENE1803X	2766	 GMPR -  Guanosine monophosphate reductase	1	0.4	0.02	-0.17	-0.26	0.03	-0.22	-0.23	0.19	-0.88	-0.4	-0.55	-0.6	-0.35	0.32	-0.49	0.18	-0.34	0.47	0.11	-0.66	0.21	0.34	-0.27	-0.21	0.23	0.03	-1	-0.64	0.1	2.4	3.17	-0.18	0.05	-0.23	1.04
GENE889X	4283	 CXCL9 -  Chemokine (C-X-C motif) ligand 9	1	0.15	-0.35	0.16	-0.01	0.06	0.75	-0.19	0.19	-0.01	0.27	0.07	0.47	0.33	0.44	-0.21	-0.04	-0.37	0.31	0.07	-0.09	-0.46	0.49	-0.47	-0.43	-0.24	-0.47	-0.26	-0.7	0.49	4.85	3.55	-0.33	-0.35	0	0.94
GENE681X	684	 BST2 -  Bone marrow stromal cell antigen 2	1	-0.24	0.31	-0.57	0.37	0.12	-1.88	-0.84	0.07	-0.27	-0.45	-0.95	-0.79	-0.03	0.33	-0.23	-0.58	-0.66	-0.25	-0.74	0.02	0.16	0.56	0.27	0.26	0.38	0.28	-0.07	0.26	-1.38	4.53	5.55	1.13	0.86	0.53	0.69
GENE989X	9830	 TRIM14 -  Tripartite motif-containing 14	1	-0.41	-0.12	0.44	0.11	-0.03	-0.51	-0.85	-0.01	-0.32	-0.14	-0.28	-0.73	0.21	0.47	0.25	0	-0.31	-0.23	-0.2	-0.04	-0.31	0.54	0.26	-0.06	0.14	0.79	-0.66	0.97	-0.75	3.07	2.66	1.04	0.56	0.58	0.37
GENE891X	11119	" BTN3A1 -  Butyrophilin, subfamily 3, member A1"	1	-0.11	-0.4	0.51	-0.01	0	-0.52	-0.48	-0.26	-0.46	-0.54	-0.78	-0.69	0.38	0.36	-0.41	-0.55	-0.9	0.62	0.22	-0.15	-0.49	0.42	-0.43	0.29	-0.12	-0.2	-0.14	-0.35	-0.97	2.3	2.95	0.13	-0.16	-0.58	0.74
GENE1453X	6352	 CCL5 -  Chemokine (C-C motif) ligand 5	1	-0.02	-0.29	0.28	-0.09	0.06	0.03	0.3	0.01	-0.01	0.04	-0.23	-0.84	0.31	0.3	-0.13	0.07	-0.03	0.07	0.18	0.1	-0.24	-0.04	0.16	0.06	-0.03	-0.04	-0.23	-0.55	-0.11	1.78	2.2	0.17	0.15	-0.07	0.13
GENE794X	26292	 MYCBP -  Transcribed locus	1	-0.37	-0.07	0.19	0.1	0.13	-0.04	0.01	-0.02	-0.17	-0.26	-0.27	-0.73	0.3	0.42	0	-0.28	0.05	0.01		-0.15	-0.17	0.33	0.28	-0.81	-0.14	0.52	0.45	-0.58	0.02	1.76	2.14	0.36	0.44	-0.03	0.63
GENE1676X	355	" FAS -  Fas (TNF receptor superfamily, member 6)"	1	-0.14	-0.11	0.25	-0.01	0	0.18	-0.49	0.17	0.38	0.54	-0.09	-0.6	0.55	0.01	0.07	0.11	0.14	1.05	-0.03	-0.13	0.13	0.03	-0.23	-0.31	0.18	0.16	0.28	-0.3	-0.08	1.83	1.9	0.08	0.2	0.52	0.97
GENE824X	6648	" SOD2 -  Superoxide dismutase 2, mitochondrial"	1	-0.04	-0.1	0.19	-0.04	-0.03	0	-1.52	0.27	0.07	0.22	-0.19	-1.2	0.74	-0.1	0.19	0.22	0.57	0.58	0.31	-0.34	0.12	-0.08	0.09	-1.2	-0.15	0.07	0.1	0.38	-1.04	2.24	2.22	0.19	0	0.72	0.99
GENE325X	4814	 NINJ1 -  Ninjurin 1	1	-0.07	0.12	-0.57	0.39	0.14	-0.23	-1.89	0.15	0.02	0.44	-1.07	-0.91	0.39	-0.06	0.01	0.05	0.89	0.42	-0.25	0.6	-0.22	-0.12	0.34	-0.51	-0.09	0.38	0.04	-0.09	-1.85	2.94	3.81	0	0.26	0.89	1.94
GENE1071X	3135	" HLA-G -  Major histocompatibility complex, class I, G"	1	-0.15	0.08	-0.07	0.3	-0.15	-0.84	-1.26	-1.32	-0.4	-0.62	-0.9	-1.59	-0.35	-0.93	-0.64	-0.59	-0.21	-0.45	0.3	0.35	-0.34	-0.31	-0.17	0.16	0.05	-0.18	-0.31	0.16	-0.38	1.79	2.39	-0.43	-0.64	-0.19	0.43
GENE1181X	64116	" SLC39A8 -  Solute carrier family 39 (zinc transporter), member 8"	1	0.07	0.04	0.07	-0.13	-0.05	-0.71	-1.31	-0.27	-0.06	-0.43	-0.57	-1.16	0.34	-0.31	-0.17	0.08	0.15	-0.37	0.05	0.08	-0.27	0.19	-0.11	0.12	-0.05	0.23	0.14	-0.33	0.87	1.93	2.87	0.03	-0.14	-0.09	0.88
GENE876X	51056	 LAP3 -  Leucine aminopeptidase 3	1	0.29	0.26	-0.25	-0.15	-0.16	-1.02	-0.77	-0.3	0.22	-0.16	-0.69	0.13	0.83	-0.1	-0.13	-0.12	-0.01	-0.73	-0.45	-0.57	0.8	0.22	0.5	0.26	0.34	-0.7	-0.44	-1.14	-1.04	2.69	3.14	0.21	-0.02	0.37	1.74
GENE1820X	6773	" STAT2 -  Signal transducer and activator of transcription 2, 113kDa"	1	0.07	-0.17	-0.04	0.25	-0.11	-0.27	-0.42	-0.9	-0.42	-0.79	-0.39	-0.75	0.26	-0.37	-0.38	-0.52	-0.19	0.41	0.25	-0.29	-0.13	0.17	-0.05	-0.12	-0.14	-0.76	-0.95	-0.69	-0.66	2.06	2.04	-0.55	-0.94	-0.63	0.15
GENE1536X	4683	 NBN -  Nibrin	1	-0.05	-0.09	-0.05	0.2	-0.05	-0.57	-0.08	0.03	-0.19	-0.41	-0.7	-0.65	0.75	0.33	0.13	-0.15	0.17	2.38	0.28	-0.22	-0.14	0.07	0.32	0.16	-0.05	-0.1	-0.35	0.2	-0.46	2.34	3.07	-0.12	-0.3	-0.14	0.92
GENE1220X	1520	 CTSS -  Cathepsin S	1	-0.14	0.05	-0.38	0.32	0.14	-0.15	-1.03	0.2	0.05	0.22	-0.44	-0.65	0.24	0.32	0.26	0.46	0.3	-0.04	0.11	0.3	0.05	-0.31	-0.84	-0.18	-0.28	-0.7	-1.14	-0.28	0.2	2.01	2.87	-0.52	-1.32	-0.08	0.69
GENE1852X	27063	 ANKRD1 -  Ankyrin repeat domain 1 (cardiac muscle)	1	-0.09	0.15	-0.56	0.19	0.31	0.17	0.12	-0.03	-0.02	0.55	0.52	0.36	0.14	-0.14	-0.23	0.15	0.01	-0.71	0.05	0.29	0.14	-0.47	-0.88	-0.33	-0.06	0.34	0.52	-0.2	0.14	2.09	2.16	-0.52	0.26	0.61	0.23
GENE273X	6354	 CCL7 -  Chemokine (C-C motif) ligand 7	1	0.06	-0.29	-0.1	0.08	0.24	1.38	1.15	0.31	0.15	1.04	1.11	-0.53	-1.83	-1.86	0.08	0.07	-0.39	-4.08	-0.38	0.62	-0.03	-0.2	-0.75	-1	0.1	0.58	1.32	-0.32	1.92	4.66	5.34	0.26	0.56	2.42	2.31
GENE1688X	6347	 CCL2 -  Chemokine (C-C motif) ligand 2	1	-0.02	-0.32	-0.05	0.09	0.3	-0.77	-0.81	0.84	0.34	0.57	0.5	-1.77	-1.44	-0.75	0.59	-0.28	-0.92	-5.38	0.5	-0.27	-0.15	-0.29	-2.7	-3.07	0.69	2	1.51	-2.4	-1.58	5.55	5.85	0.65	1.74	3.47	1.82
GENE109X	623	 BDKRB1 -  Bradykinin receptor B1	1	1.49	0.08	-0.51	-0.97	-0.08	-0.28	0.32	-0.79	0.18	-0.96		-0.31	-0.99	-0.16	-0.66	0.01	-0.74	-1.09	0.26	-0.05	0.63	-0.83	-0.47	-1.17	0.56	1.98	2.38	0.92	-0.19	4.5	3.91	0.9	1.88	3.02	2.23
GENE1835X	3777	" KCNK3 -  potassium channel, subfamily K, member 3"	1	0.14	0.06	-0.01	-0.3	0.11	0.02	-0.08	-0.41	-0.1	-0.37	0.26	-0.31	-0.65	-0.32	-0.12	0.07	-0.37	-0.35	0.2	0.17	-0.08	-0.31	0.12	-0.31	0.55	1.33	1.23	0.4	1.19	2.45	2.22	0.3	0.64	1.55	0.89
GENE108X	10544	" PROCR -  protein C receptor, endothelial"	1	0.11	0.14	-0.31	0.02	0.04	0.44	0.97	0.37	0.14	0.36	0.32	-0.12	-0.59	0.6	0.15	-0.47	-0.2	-0.16	-1.39	-0.05	0.76	0.67	1.07	0.34	0.74	0.62	0.51	0.7		1.92	2.58	0.89	0.62	0.4	0.74
GENE680X	57169	" ZNFX1 -  Zinc finger, NFX1-type containing 1"	1	-0.26	0.18	-0.06	0.28	-0.16	-0.49	-0.41	-0.11	0.05	0.52	0.18	-0.31	-0.58	-0.81	-0.57	-0.38	-0.29	-0.18	-1.35	-0.01	0.52	0.85	0.62	-0.55	0.94	0.61	0.74	-0.56	-0.58	1.88	2.91	0.7	0.38	1.01	1.11
GENE799X	4792	" NFKBIA -  Nuclear factor of kappa light polypeptide gene enhancer in B-cells inhibitor, alpha"	1	0.1	-0.25	0.26	0.12	-0.14	-0.42	-0.61	0.38	-0.17	0.86	-1	0.02	-0.09	-0.94	-0.02	-0.14	0.22	0.56	-0.11	-0.52	0.56	0.06	-0.3	-1.08	1.07	0.31	1.21	1.22	0.1	3.14	2.86	1.56	1.47	2.4	1.78
GENE1629X	7128	" TNFAIP3 -  tumor necrosis factor, alpha-induced protein 3"	1	-0.24	0.13	-0.12	0.22	0.04	-0.41	-1.51	0.5	0.51	0.32	-1.38	-1.49	0.61	0	0.42	0.34	0.67	0.16	0.19	-0.26	0.1	-0.08	0.9	-0.01	1.03	0.27	1.41	0.97	0.65	4.01	4.01	0.96	0.79	3.64	1.96
GENE107X	3892	 KRT86 -  Keratin 86	1	0.65	-0.06	0.45	-1.02	-0.01	0.44	0.11	-0.4	-0.11	-0.03	-0.65	0.45	-0.37	-0.31	-0.5	-0.11	-0.36	-0.26	1.31	-1.05	0.6	-0.87	1.18	1.8	0.62	1.08	2.86	1.19		2.68	3.21	1.05	1.03	1.57	1.44
GENE975X	3569	 LOC541472 -  Hypothetical LOC541472	1	0.21	0.37	0.41	-0.99	-0.01	0.8	0.19	0.04	0.05	0.4	0.45	-0.04	-0.02	0.12	0.13	0.03	0.24	0.18	0.38	-0.65	0.25	0.02	2.02	1.06	1.82	0.21	2.45	0.93	-0.97	4.64	4.07	2.07	0.82	2.54	1.14
GENE1208X	3569	" IL6 -  interleukin 6 (interferon, beta 2)"	1	0.21	0.37	0.41	-0.99	-0.01	0.8	0.19	0.04	0.05	0.4	0.45	-0.04	-0.02	0.12	0.13	0.03	0.24	0.18	0.38	-0.65	0.25	0.02	2.02	1.06	1.82	0.21	2.45	0.93	-0.97	4.64	4.07	2.07	0.82	2.54	1.14
GENE1368X	3800	 KIF5C -  Kinesin family member 5C	1	0.79	-0.38	0.16	-0.24	-0.32	1.16	0.71	1.71	0.02	0.65	0.67	-0.04	-0.47	0.63	0.19	-0.37	0	-0.28	-0.03	-0.45	0.2	0.29	1.3	0.89	0.2	0.6	1.05	1.51	0.31	3.31	2.85	1.6	1.7	0.42	0.85
GENE440X	10529	 NEBL -  Nebulette	1	0.02	0.09	0.22	-0.14	-0.21	1.34	-0.01	0.6	-0.57	1.52	-0.85	-0.61	-0.47	0.21	-0.03	-0.38	-0.37	-0.15	0.16	-0.89	0.34	0.4	1.43	0.2	-0.12	1.44	1.48	1.68	-0.56	2.21	2.54	0.98	1.52	0.76	0.38
GENE1533X	1440	 CSF3 -  Colony stimulating factor 3 (granulocyte)	1	0.07	-0.03	0.06	0.01	-0.09	0.45	0.15	0.16	-0.33	0.18	-0.27	-0.16	-0.12	-0.2	0.05	0.11	-0.86	-1.19	0.7	-0.7	-0.02	0.02	0.25	0.12	-0.09	-0.43	-0.02	0.21	0.56	2.82	4.47	0.19	0.18	-0.01	-0.77
GENE116X	7097	 TLR2 -  Toll-like receptor 2	1	0.01	-0.22	-0.06	0.18	0.11	1.13	1.2	-0.42	0.07	-0.62	-0.41	-0.17	-0.41	-0.16	0.17	0.59	-0.43	-1.37	0.57	-1.01	0.08	0.35	0.35	0.17	-0.24	-1.21	-0.54	0.37		2.47	3.27	0.15	0.42	-0.58	-0.4
GENE117X	387104	 C6orf174 -  Chromosome 6 open reading frame 174	1	-0.37	0.11	0.82	-0.65	0.09	0.01	0.39	0.32	0.16	0.39	0.64	-0.08	0.11	0.71	-0.29	-0.74	-0.64	-0.39	0.22	-0.32	-0.04	0.14	-0.23	-0.26	0.05	-0.03	-0.26	-0.55		2.59	1.61	0.46	-0.06	-0.22	-0.14
GENE1169X	4356	" MPP3 -  Membrane protein, palmitoylated 3 (MAGUK p55 subfamily member 3)"	1	-0.64	0.02	0.91	-0.34	0.04	0.62	0.19	0.33	0.1	0.18	0.08	-0.01	0.24	1.04	0.69	-0.55	0.12	0.12	-0.03	-0.47	-0.08	0.58	0.49	0.42	0.21	0.57	0.42	-0.02	-0.46	1.82	1.92	0.3	0.55	0.31	0
GENE472X	3959	" LGALS3BP -  Lectin, galactoside-binding, soluble, 3 binding protein"	1	0.05	-0.01	0.06	-0.14	0.03	-2.7	1.23	0.33	0.21	0.57	0.81	0.56	-0.01	-0.41	0.49	0.2	0.15	-0.84	-0.09	-0.08	0.06	0.09	1.52	0.34	0.37	0.01	0.29	0.68	-0.64	3	3.79	0.57	0.41	0.75	0.5
GENE321X	634	 CEACAM1 -  Carcinoembryonic antigen-related cell adhesion molecule 1 (biliary glycoprotein)	1	-0.37	0.47	0.05	-0.57	0.43	-0.31	0.62	-0.12	0.34	-0.09	0.62	-0.16	0.48	-0.26	-1.64	-1.5	-0.22	-0.79	-0.28	1.24	-0.35	-0.61	0.45	1.94	-0.2	-0.73	0.41	0.27	1.27	3.55	2.55	-0.15	-0.78	0.09	1.31
GENE439X	89795	 NAV3 -  neuron navigator 3	1	0.14		0.41	-0.23	-0.32	0.38	0.63	0.46	0	0.05	0.5	-0.09	0.01	-0.04	-1.05	-0.35	-0.62	-0.04	0.15	-0.4	-0.04	0.29	1.11	-0.59	0.08	0.43	0.75	1.59	-0.27	1.99	1.98	-0.02	-0.15	-0.09	0.36
GENE488X	79669	 C3orf52 -  Chromosome 3 open reading frame 52	1	0.52	0.11	0.04	-0.1	-0.58	0.08	0.32	-0.13	0.03	0.07	0.16	0.04	-0.21	-0.7	-0.74	-0.32	-0.36	-0.81	0.32	-0.07	0.14	-0.39	1.05	-0.1	-0.84	-0.15	1.18	1.66	0.3	1.62	0.79	0.64	0.12	0.8	-0.14
GENE308X	3017	" HIST1H2BD -  Histone cluster 1, H2bd"	1	-0.4	-0.17	0.45	-0.03	0.15	0.37	1.66	-0.03	0.08	0.4	0.33	1.24	-0.27	0.13	0.09	-0.37	-0.11	-0.71	-0.38	0.23	0.16	-0.01	0.49	1.77	0.05	0.29	0.12	0.35	1.1	0.95	2.47	0.62	-0.2	0.05	0.11
GENE838X	8334	" HIST1H2AC -  Transcribed locus, strongly similar to NP_001005967.1 histone 2, H2a [Danio rerio]"	1	-0.56	0.05	0.27	0.05	0.18	0.63	1.15	0.05	-0.04	0.03	0.15	-0.65	-0.56	-0.6	-0.68	-0.46	-0.34	-1.56	-0.42	0.53	0.1	-0.2	0.59	2.59	0.19	0	0.03	0.13	0.81	0.56	1.87	0.22	0.09	-0.97	-0.29
GENE1677X	23524	 SRRM2 -  serine/arginine repetitive matrix 2	1	-0.37	-0.45	0.09	0.19	0.54	0.25	0.09	0.4	0.19	0.01	-0.19	-0.34	0.36	0.21	-0.44	-0.1	-0.17	-0.49	-0.1	0.39	-0.07	-0.21	0.79	1.44	-0.33	-0.54	-0.15	-0.17	-0.25	1.63	1.79	-0.6	-0.21	-0.57	0.12
GENE1218X	643977	 FLJ32255 -  Hypothetical protein LOC643977	1	-0.28		-0.08	0.09	0.26	0.78	1.18	0.1	0.04	-0.52	-0.49	-1.16	0.48	0.41	-0.01	0.02	-0.29	-1.46	0.23	-0.12	-0.38	0.26	1.28	0.96	-0.06	0.01	-0.38	-0.32	0.16	1.86	1.68	-0.34	-0.4	-0.6	-1.25
GENE634X	8876	 VNN1 -  Vanin 1	1	-0.25	0.08	-0.05	0.22	0.02	-1.43	-0.57	-0.23	-0.23	-0.4	-0.19	-1.03	1.3	1.06	0.05	0.05	0.42	0.87	-0.57	-0.09	-0.32	0.99	1.7	0.34	-0.47	1.17	1.22	1.05	1.26	1.28	1.6	1.3	0.55	0.96	0.45
GENE1338X	23609	 MKRN2 -  Makorin ring finger protein 2	1	-0.21	-0.09	0.19	0.25	-0.16	-1.77	-1.42	-0.55	-0.61	-0.63	-1.64	-1.75	0.03	0.25	-0.13	-0.25	-0.29	0.81	-0.09	0.37	-0.62	0.35	0.82	-0.27	-0.3	0.53	0.55	0.1	1.15	0.1	0.6	0.54	0.72	-0.09	-0.68
GENE78X	5918	 RARRES1 -  Retinoic acid receptor responder (tazarotene induced) 1	1	-0.2	-0.13		-0.14	0.46		-2.51	-0.7	-0.49	-0.75	-1.22	-1.95	1.23	0.94	-0.34	0.82	0.27	1.75	0.31	0.31	-0.41	-0.2	0.66	-0.09	-0.71	0.43	-0.02	-1.27	2.03	-0.48	1.02	0.2	-0.25	-0.56	-0.03
GENE1319X	53335	 BCL11A -  B-cell CLL/lymphoma 11A (zinc finger protein)	1	0.11	0.14	-0.13	0.02	-0.14	-1.39	-1.49	-0.31	-0.94	-0.66	-1.46	-2.27	0.06	0.25	-0.31	-0.47	-0.83	2.34	0.09	-0.34	0.22	0.04	-0.41	0.32	-0.16	-0.21	-0.68	-0.59	0.39	-0.4	-0.03	-0.04	-0.33	-0.67	-0.92
GENE101X	57817	 HAMP -  Hepcidin antimicrobial peptide	1	0.3	-0.04	0.65	-1.26	0.33	-2.28	-2.82	0.31	-0.36	-0.67	-1.14	-3.09	-0.39	-0.21	0.11	-0.17	-0.43	-0.44	1.3	-1.29	0.77	-0.77	-0.81	-0.34	-0.85	2.3	-0.7	0.13		0.32	0.29	1.28	0.66	-0.69	-0.92
GENE1427X	84910	 TMEM87B -  transmembrane protein 87B	1	0.57	-0.06	-0.21	-0.1	-0.19	-1.89	-0.76	-0.23	-0.39	-0.91	-1.79	-2.17	-0.45	-0.32	-0.44	0.15	-0.57	-0.84	0.79	-0.12	0.19	-0.86	-0.26	0.62	-0.12	-0.82	-0.7	0.38	-0.06	1.23	0.87	0.19	-0.16	-0.38	0.74
GENE1723X	6195	" RPS6KA1 -  Ribosomal protein S6 kinase, 90kDa, polypeptide 1"	1	-0.04	-0.08	-0.24	0.34	0.03	0.05	0	-0.28	-0.68	-0.82	-2.17	-2	0.01	0.22	-0.57	-0.48	-0.29	-1.32	-0.3	-0.14	-0.2	0.64	0.52	-0.01	0.2	0.54	0.35	0.75	0.97	0.61	0.54	0.57	0.69	0.25	0.88
GENE99X	10044	 SH2D3C -  SH2 domain containing 3C	1	-0.4	-0.19	0.16	0.34	0.11	-1.27	-0.92	0.18	-0.81	-0.86	-2.21	-1.93	-0.29	-0.18	-0.21	-0.46		-0.29	-0.06	-0.42	-0.12	0.6	0.41		-0.02	0.11	-0.03	0.64		0.8	0.62	0.64	0.46	-0.53	0.64
GENE993X	2877	 GPX2 -  Glutathione peroxidase 2 (gastrointestinal)	1	-0.15	0.01	0	0.58	-0.42	-1.8	-1.32	-0.71	-0.79	-1.01	-0.74	-1.51	-0.98	-0.5	-0.23	-0.56	-1.7	-1.24	-0.2	-0.07	-0.03	0.3	-0.28	-0.36	0.56	0.63	0.31	0.64	1.63	1.15	0.72	1.48	0.78	0.37	-0.03
GENE100X	3772	" KCNJ15 -  Potassium inwardly-rectifying channel, subfamily J, member 15"	1	0.21		-0.65		0.45	-1.59	-2.07	-0.22	-0.49	-1.43	-1.1	-1.11	-1.24	-0.88	0.01	-0.3	-0.99		0.32		-0.45	0.13		-0.1	0.05	0.04	-0.54	0.01	0.78	1.16	-0.03	-0.08	-0.11	-0.66	0.25
GENE1543X	3109	" HLA-DMB -  major histocompatibility complex, class II, DM beta"	1	-0.23	0.15	-0.7	0.52	0.34	-2.24	-2.48	-0.16	0.01	-0.34	-0.8	-1.93	0.44	0.34	0.32	0.14	0.18	0.55	0.32	0.1	-0.21	-0.05	1.19	1.08	0	0.21	-0.09	-0.31	-0.45	-0.61	-0.72	0.17	0.39	-0.03	0.03
GENE599X	80222	" TARS2 -  Threonyl-tRNA synthetase 2, mitochondrial (putative)"	1	-0.35	0.41	-0.26	0.42	-0.22	-0.72	0	-0.38	-0.3	-0.45	-1.59	-1.94	0.17	0.1	-0.43	-0.24	-0.21	-0.71	-0.76	-0.08	0.43	0.41	0.71	0.5	1.27	0.25	-0.22	-0.04	-1	0.19	0.1	0.5	0.34	0.22	-0.28
GENE1212X	648987	 LOC648987 -  hypothetical LOC648987	1	-0.28	-0.5	0.35	0.39	0.04	-0.64	0.14	-0.13	-0.2	-0.74	-1.59	-2.26	0.3	0.43	-0.09	-0.26	-0.14	-0.41	0.09	-0.61	0.12	0.4	0.44	0.45	-0.08	0.3	-0.65	-0.43	-0.89	0.69	1.19	0.12	0.01	-0.34	-1.1
GENE1735X	55717	 WDR11 -  WD repeat domain 11	1	-0.09	-0.09	0.02	0.11	0.06	-0.4	-0.82	0.07	0.04	-0.43	-1.81	-2.43	-0.05	0.02	0.28	0.2	-0.04	-0.31	0.16	-0.45	0.08	0.21	-0.07	-0.01	0.05	-0.01	-0.33	-0.18	-0.83	0.57	0.59	0.3	0.16	0	-0.6
GENE1757X	54455	 FBXO42 -  F-box protein 42	1	-0.09	0.03	0.11	0.17	-0.21	-1.39	-0.47	-0.11	-0.27	-0.31	-1.88	-1.71	-0.44	-0.51	-0.02	-0.35	-0.11	0.19	-0.17	-0.32	0.13	0.2	0.12	0.27	-0.16	-0.11	-0.54	-0.18	-0.31	0.04	-0.1	0.34	-0.14	-0.99	-0.37
GENE4X	374659	 HDDC3 -  HD domain containing 3	1	-0.44		0.17	0.14	0.12	-2.44	-0.51	-0.06	-0.38	-0.64	-1.73	-1.86	0.1	0.41	-0.19	-0.62	-0.55	0.58	-0.17	0.11	-0.01	0.08	-0.73		-0.13	0.05	-0.31	-0.8		-0.87	-0.89	-0.02	-0.19	-0.76	-0.57
GENE642X	55347	 ABHD10 -  abhydrolase domain containing 10	1	-0.37	-0.17	0.19	0.24	0.12	-1.57	0.13	0	-0.35	-0.59	-2.28	-2.29	0.5	0.81	-0.09	-0.29	-0.08	0.24	-0.27	-0.1	-0.09	0.47	0.76	0.24	-0.02	0.24	-0.29	0.22	-0.9	-0.75	-0.82	0.16	-0.01	-0.05	-0.33
GENE864X	23221	 RHOBTB2 -  Rho-related BTB domain containing 2	1	-0.26		0.07	0.37	-0.17	-1.82	-0.82	-0.82	-0.82	-0.82	-2.04	-2.22	-0.22	0.52	-0.47	-0.62	-0.14	-1.21	0.21	-0.1	-0.4	0.28	-0.51	-0.65	-0.09	0.05	-0.24	-0.66	-1.66	-0.67	-1.17	0.02	0.07	-0.59	-0.96
GENE985X	9488	" PIGB -  phosphatidylinositol glycan anchor biosynthesis, class B"	1	-0.31	0	0.05	-0.02	0.12	-1.49	-0.58	0.19	-0.08	-0.55	-1.64	-1.59	-0.32	-0.15	0.02	0.12	-0.21	-0.57	0.01	-0.17	0.04	0.09	0.19	-0.64	-0.41	-0.55	-0.94	-0.78	-0.87	-0.3	-0.75	0.1	-0.06	-0.61	-0.93
GENE192X	80005	 DOCK5 -  Dedicator of cytokinesis 5	1	0.02	-0.2	0.17	0.03	-0.01	-1.62	0.28	0.06	-0.34	-0.61	-1.15	-1.88	-0.34	-0.06	-0.07	-0.02	-0.55	-0.94	0.25	-0.66	0.45	-0.05	0.24	-0.31	0.29	-0.24	-0.43	-0.04	-1.07	0.12	-1.01	0.58	0.44	-0.13	-0.53
GENE753X	90427	 BMF -  Bcl2 modifying factor	1	-0.26	-0.36	-0.35	0.4	0.56	-3.12	-2.58	0.14	-0.06	-0.43	-1.59	-1.69	0.53	-0.27	-0.24	0.19	0.27	0.82	-0.42	0.33	-0.26	0.36	-0.6	-0.03	0	-0.57	-0.92	-1.52	-0.57	-1.16	-1.13	0.01	-0.63	-0.41	-0.56
GENE1063X	3064	 HTT -  Huntingtin	1	-0.2	-0.04	-0.2	0.3	0.14	-1.68	-1.39	-0.21	-0.31	-0.56	-1.34	-2.17	0.07	0.37	-0.16	-0.12	0.02	-0.9	-0.35	0.12	-0.13	0.36	-0.77	-0.67	0.14	-0.17	-0.41	-1.54	0.29	-0.88	-1.07	-0.21	-0.37	-0.25	-0.57
GENE200X	51524	 TMEM138 -  Transmembrane protein 138	1	-0.37	-0.02	0	0	0.39	-2.52	-1.96	-0.02	-0.59	-0.41	-1.97	-3.05	0.38	-0.04	-0.74	-0.09	-0.16	-0.26	-1.56	1.2	0.38	-0.01	-0.25	-0.43	-0.05	-0.38	-0.51	-2.25	0.26	-1.47	-0.7	0.05	-0.19	-0.95	-1.29
GENE514X	80142	 PTGES2 -  Prostaglandin E synthase 2	1	-0.36	0.07	0.11	0.08	0.08	-2.39	-1.36	-0.79	-0.57	-0.31	-1.28	-2.04	-0.14	-0.65	-1.09	-0.66	-0.25	-0.82	-1.26	1.25	0.04	-0.02	-0.21	0.62	-0.07	-0.03	0.07	-1.75	-0.24	-1.13	-0.47	0.06	0.05	-0.54	-0.13
GENE456X	383	" ARG1 -  Arginase, liver"	1	-0.25	-0.14	0.25	0.18	-0.05	-1.64	-2.26	-0.9	-1.03	-0.72	-1.8	-2.11	-1.07	-0.44	0.23	0.15	-0.26	-0.54	-0.64	0.02	-0.43	1.04	0.68	-0.45	2.8	0.65	0.56	0.49	-0.61	0.57	0.76	0.79	0.57	0.45	-0.03
GENE97X	5217	 PFN2 -  profilin 2	1	-0.03	0.23	-0.1	0.32	-0.41	-1.31	-1.66	-0.88	-0.64	-0.61	-2.15	-1.97	-1.24	-1.39	-1.04	-0.31	-0.35	-0.19	0.01	-0.32	-0.08	0.39	0.87		0.1	-0.01	-0.22	0.11		0.68	0.68	0.4	-0.1	-0.52	-0.7
GENE98X	56997	" CABC1 -  Chaperone, ABC1 activity of bc1 complex homolog (S. pombe)"	1	-0.08	-0.2	0.13	0.13	0.01	-2.34	-1.76	-0.07	-0.31	-0.33	-1.49	-0.96	0.28	-0.17	-0.18	-0.1	0.06	1	-0.12	-0.4	0.22	0.29	-0.1	0.57	0.28	0.14	-0.17	0.43		-0.12	0.48	0.7	0.37	-0.53	0.35
GENE535X	978	 CDA -  Cytidine deaminase	1	-0.47	-0.17	0.24	0.14	0.27	-1.84	-2.05	-0.13	-0.09	0.22	-0.85	-2.2	-0.32	0.59	0.1	0.09	0.18	-1.02	0.29	0.03	0.1	-0.42	-0.51	-0.97	-1.34	0	-0.16	-0.98	0.04	0.04	0.41	-0.4	-0.61	-0.41	0.47
GENE1145X	140885	 SIRPA -  Transcribed locus	1	-0.34	-0.23	-0.23	0.53	0.26	-1.49	-1.23	-0.06	-0.1	-0.31	-1.43	-1.9	0.37	0.15	0.08	-0.04	0.17	-0.07	0.14	0.1	-0.34	0.17	0.87	0.04	-0.16	0.29	0.08	-1.17	-1.56	-0.77	1.6	-0.49	-0.17	0.08	0.16
GENE410X	1475	 CSTA -  Cystatin A (stefin A)	1	-0.19	-0.25	-0.93	0.71	0.68	-1.34	-2	0.11	0.26	0.34	-0.28	-1.8	0.12	-0.06	0.11	0.29	0.4	-0.69	-0.68	0.68	-0.09	0.08	-0.11	0.16	0.08	0.14	0.07	-0.64	-0.4	-0.97	0.18	-0.95	0.16	0.38	-0.18
GENE1668X	7940	 LST1 -  Leukocyte specific transcript 1	1	-0.07	-0.12	-0.39	0.3	0.27	-1.82	-2.41	-0.12	-0.43	0.3	-1.33	-1.89	-0.07	-0.53	-0.05	-0.01	0.7	-0.62	-0.34	0.22	-0.26	0.22	0.52	0.07	-0.36	-0.21	-0.09	-0.76	-0.85	-0.26	0.19	-0.19	-0.18	-0.75	-0.7
GENE491X	54674	 LRRN3 -  Leucine rich repeat neuronal 3	1	0.47	-0.68	-0.56	0.34	0.42	-1.75	-3.1	-0.13	-0.61	-0.04	-2.06	-2.96	0.02	-1.21	0.48	0.71	0.06	-1.4	-0.19	0.44	0.1	-0.37	-0.75	-0.1	0.22	-0.28	-0.96	-2.25	-2.29	-0.5	1.6	-0.16	-0.51	0.23	-0.87
GENE583X	10314	 LANCL1 -  LanC lantibiotic synthetase component C-like 1 (bacterial)	1	-0.31	-0.14	-0.7	0.58	0.59	-1.47	-2.98	-0.66	-0.7	0.06	-1.53	-3.73	0.03	-0.75	0.21	0.67	0.64	-1.21	0.42	0.36	-0.5	-0.28	-0.14	-0.87	-1.16	-0.88	-0.87	-2.27	-1.65	-0.86	0.13	-0.99	-0.67	-0.52	-0.8
GENE188X	366	 AQP9 -  Aquaporin 9	1	0.37	0.19	-2.54	0.87	1.11	-1.46	-3.3	0.43	-0.57	0.21	-1.58	-3.12	0.28	-0.73	0.87	1.08	0.45	-1.14	0.7	-0.12	-0.43	-0.15	-0.59	-0.74	-1.36	-0.84	-0.98	-2.17	-2.29	-1.09	0.07	-1.31	-0.59	-0.41	-1.37
GENE1403X	27299	" ADAMDEC1 -  ADAM-like, decysin 1"	1	0.01	-0.1	-0.4	0.27	0.21	-1.53	-2.76	0.11	0.2	-0.47	-3.21	-2.3	0.25	-0.13	0.18	0.27	-0.78	-0.36	-0.09		0.02	0.07	-0.2	-0.1	-0.32	-0.17	-0.83	-0.48	-0.48	-1.09	-1.04	-0.02	-0.76	-0.49	0.39
GENE1177X	4199	" ME1 -  Malic enzyme 1, NADP(+)-dependent, cytosolic"	1	0.36	0.64	-1.23	0.15	0.07	-1.83	-1.76	0.37	0.08	-0.24	-1.81	-1.94	1.37	0.76	0.35	0.6	-0.11	1	-0.52	-0.15	0.38	0.29	-0.4	-0.66	-0.05	-0.18	-0.47	-0.9	-0.1	-0.47	-0.87	0.02	0.35	0.45	-0.16
GENE345X	2631	 GBAS -  Glioblastoma amplified sequence	1	0.21	0.37	-1.2	0.33	0.28	-1.63	-1.13	0.41	0.45	0.23	-1.72	-1.7	0.11	0.45	0.37	0.39	0.26	0.5	-1.25	-0.52	0.78	1	0.56	-0.14	0.87	0.57	0.06	-0.01	-1.04	0.03	-0.52	0.85	0.44	0.43	0.2
GENE903X	2275	 FHL3 -  Four and a half LIM domains 3	1	-0.31	-0.21	0.24	0.11	0.19	-1.43	-1.78	-0.2	-0.3	-0.31	-1.11	-2.01	-0.77	-0.78	0.03	-0.12	0.17	-0.14	-0.22	-0.36	-0.19	0.76	0.06	-0.59	0.12	1.3	0.86	-0.17	-0.98	1.34	0.93	0.35	1.08	0.82	0.47
GENE638X	10261	" IGSF6 -  Immunoglobulin superfamily, member 6"	1	0.07	0.17	-1.39	0.75	0.38	-2.96	-3.68	0.37	0.51	0.35	-1.84	-1.42	0.05	-0.71	0.58	0.31	-0.1	-0.2	-0.74	-1.07	0.97	0.83	1.18	-0.05	0.27	0.48	0.3	0.54	0.37	0.55	0.53	0.67	0.74	0	1.32
GENE455X	338382	" RAB7B -  RAB7B, member RAS oncogene family"	1	-0.01		-0.63	0.85	-0.19	-0.16	-1.1	-0.95	-0.14	-0.7	-2.06	-3.15	-0.14	-0.56	-0.1	0.46	0.35	-1.15	0.14	-0.17	-0.28	0.31	-0.34	-0.75	0.62	0.28	-0.09	-0.47	1.07	0.16	0.22	0.05	0.22	-0.25	-0.41
GENE303X	1234	 CCR5  -  Chemokine (C-C motif) receptor 5	1	0.43	-0.12	-1.11	0.42	0.38	-0.72	-2.09	-0.81	-0.35	-0.37	-1.8	-2.98	-0.53	-0.98	-0.25	-0.34	0.09	-2.7	-0.32	-0.26	0.24	0.34	0.25	0.14	-0.35	-0.32	-0.25	-0.33	1.21	-0.05	-0.31	-0.17	-0.38	0.11	-0.36
GENE562X	1234	 CCR5 -  chemokine (C-C motif) receptor 5	1	0.43	-0.12	-1.11	0.42	0.38	-0.72	-2.09	-0.81	-0.35	-0.37	-1.8	-2.98	-0.53	-0.98	-0.25	-0.34	0.09	-2.7	-0.32	-0.26	0.24	0.34	0.25	0.14	-0.35	-0.32	-0.25	-0.33	1.21	-0.05	-0.31	-0.17	-0.38	0.11	-0.36
GENE1485X	2313	 FLI1 -  Friend leukemia virus integration 1	1	-0.16	0.04	-0.79	0.64	0.27	-1.87	-1.65	0.19	-0.45	-0.45	-1.69	-1.82	0.58	0.25	0.38	-0.4	0.26	-0.15	-0.46	0.3	0.06	0.1	0.6	0.35	-0.07	0.06	0.74	-0.3	-0.22	0.08	0.11	-0.13	-0.05	-0.1	0.57
GENE1183X	8832	 CD84 -  CD84 molecule	1	0.18	0.16	-0.78	0.51	-0.05	-1.27	-1.59	-0.03	-0.58	-1.1	-1.3	-1.67	-0.55	-0.58	0.25	-0.09	-0.35	-0.52	-0.49		-0.02	0.51	0.57	-0.15	0.06	0.09	-0.15	-0.57	0.88	0.13	0.15	-0.38	0.56	0.1	-0.36
GENE835X	9332	 CD163 -  CD163 molecule	1	0.7	0.1	-1.93	0.59	0.55	-2.76	-2.81	-0.24	-0.1	-0.9	-2	-2.18	-0.6	-1.27	0.51	0.56	-0.8	-1.49	0.31	0.03	-0.09	-0.23	0.19	-0.12	-0.17	-0.08	-0.14	-0.34	0.12	-0.44	-0.08	-0.12	-0.41	-0.12	0.1
GENE416X	51311	 TLR8 -  toll-like receptor 8	1	0.43	-0.16	-1.49	0.98	0.26	-3.55	-3.94	-1.21	-0.44	-0.5	-2.89	-3.95	1.01	-0.43	-0.77	0.88	0.9	-0.08	0.01	-0.24	-0.01	0.25	0.11	0.16	0.17	-0.02	-0.05	-0.09	0.83	-0.38	-1.05	-1.84	-0.16	-0.37	0.18
GENE555X	79365	" BHLHE41 -  Basic helix-loop-helix family, member e41"	1	-0.06	-0.17	0.06	-0.08	0.23	-2.32	-2.62	0.16	0.4	-0.07	-1.88	-2.48	0.36	1.03	0.48	0.65	0.32	-0.47	0.23	0.07	-0.19	-0.1	-1.25	-0.44	0.57	0.77	-0.04	-0.9	2.64	-0.06	0.21	0.37	0.92	0.66	-0.29
GENE1139X	25895	" FAM119B -  Family with sequence similarity 119, member B"	1	-0.2	-0.2	-0.3	0.21	0.5	-1.71	-1.36	0.22	-0.17	-0.39	-1.32	-2.01	0.65	0.21	-0.02	-0.47	0.27	-0.69	0.37	0.49	-0.13	-0.72	-1.03	0.51	0.55	-0.17	-0.38	-0.5	-0.08	0.91	0.3	-0.4	-0.05	0.39	-0.59
GENE885X	10009	 ZBTB33 -  Zinc finger and BTB domain containing 33	1	-0.07	-0.06	-0.21	0.2	0.13	-0.96	-0.81	-0.22	-0.25	-1.13	-2.11	-3.25	0.48	0.3	0	-0.01	0.06	-1.12	0.35	0.17	0.15	-0.56	-0.98	-0.11	-0.04	-0.23	-0.42	-0.09	0.17	0.68	0	-0.49	-0.35	0.16	-0.81
GENE298X	5624	 PROC -  Protein C (inactivator of coagulation factors Va and VIIIa)	1	-0.24	0.18	-0.12	0.26	-0.08	-0.98	-1.58	-1.12	-1.13	-0.73	-2.39	-3.82	-0.16	-0.34	-0.9	-0.13	-0.15	-0.8	0.73	0.53	-0.63	-0.62	-1.51	-0.44	0.27	0.19	0.49	-0.16	1.5	-0.04	-0.82	-0.37	-0.35	0.4	-0.95
GENE1018X	23313	 C22orf9 -  Chromosome 22 open reading frame 9	1	0	-0.28	-0.33	0.47	0.13	-1.19	-1.69	-0.52	-0.39	-0.54	-2.11	-2.79	0.29	0.63	-0.38	-0.16	0.06	-0.14	0.42	0.13	-0.11	-0.38	-1.4	-0.79	0.12	-0.37	-0.38	-1.07	0.41	-0.24	-0.91	-0.06	0.01	0.02	-0.53
GENE929X	100113407	 TMEM170B -  Transmembrane protein 170B	1	0.2	-0.05	-0.02	-0.08	-0.03	-0.63	-1.59	-0.35	-0.39	-0.91	-1.93	-2.71	0.27	0.52	-0.31	-0.05	-0.22	-0.86	0.29	-0.46	0.32	-0.17	-0.58	0.09	-0.2	-0.22	-0.38	0.12	0.58	-0.05	-0.55	0.44	0.28	-0.69	-0.09
GENE315X	2359	 FPR3 -  Formyl peptide receptor 3	1	-0.34	-0.38	-0.05	0.47	0.31	-0.73	-2.98	0.27	0.03	-0.24	-2.41	-3.93	-0.03	0.04	0.25	0.29	0.55	-1.77	0.19	0.01	0.02	-0.23	-0.74	0.13	0.09	-0.37	-0.04	0.07	2.12	-0.43	-0.08	-0.63	-0.82	0.15	-0.06
GENE534X	3290	 HSD11B1 -  Hydroxysteroid (11-beta) dehydrogenase 1	1	0.07	-0.33	-0.12	0.36	0.04	-1.53	-2.35	0.29	-0.02	0.33	-1.51	-1.89	-0.21	-0.58	0.22	-0.1	-0.09	-0.34	0.17	-0.11	0.04	-0.09	-0.87	0.17	-0.07	-0.39	-0.54	-0.16	0.87	-0.1	0.75	-0.92	-0.99	-0.34	0
GENE1568X	10144	" FAM13A -  Family with sequence similarity 13, member A"	1	0.12	0.07	-0.27	0.17	-0.09	-1.61	-1.33	-0.06	-0.35	-0.03	-1.39	-1.59	-0.24	-0.52	-0.12	-0.02	-0.33	0.04	-0.01	0.18	-0.05	-0.12	-0.93	-0.77	-0.09	-0.55	-0.39	-0.62	0.53	0.02	-0.06	-0.11	-0.7	-0.6	-0.23
GENE816X	2289	 FKBP5 -  FK506 binding protein 5	1	-0.01	-0.18	-0.03	0.15	0.06	-2.03	-1.95	-0.02	-0.26	-0.4	-1.24	-1.49	-0.1	-0.54	-0.13	-0.34	-0.1	0.19	0.13	0.28	0.02	-0.42	-1.56	-0.8	0.18	-0.13	-0.13	-0.2	0.87	0.22	0.2	0.18	-0.28	-0.21	0.26
GENE1751X	5993	" RFX5 -  Regulatory factor X, 5 (influences HLA class II expression)"	1	0.03	-0.05	-0.02	0.04	0.01	-2.01	-1.77	-0.23	-0.01	-0.82	-1.28	-2.17	0.14	-0.19	-0.21	-0.01	-0.1	-0.45	0.08	-0.2	0.28	-0.15	-0.65	-1.28	0.11	-0.14	-0.12	-0.47	0.59	1.23	1.11	0.3	0.11	0	0.5
GENE647X	11000	" SLC27A3 -  Solute carrier family 27 (fatty acid transporter), member 3"	1	0.1	-0.08	-0.15	0.12	0.03	-1.85	-2.09	0.02	-0.47	-0.91	-1.49	-2.64	-0.61	-0.66	-0.46	0.19	-0.45	-1.93	0.7	-0.06	0.42	-1.07	-1.87	0.01	0.09	-0.79	-0.62	-0.25	1.81	0.01	-1.01	0.48	0.38	-0.31	0.29
GENE91X	80342	 TRAF3IP3 -  TRAF3 interacting protein 3	1	-0.06	0.02	0.03	0.1	-0.08	-2.24	-1.63	0.17	-0.24	-0.91	-1.43	-2.29	-0.92	-1.29	-0.17	-0.53	-0.74	-1.75	0.52		-0.4	-0.12		0.07	0.26	0.15	0.44	0.7	3.85	0.24	1.24	0.29	0.15	0.15	0.05
GENE1547X	11024	" LILRA1 -  leukocyte immunoglobulin-like receptor, subfamily A (with TM domain), member 1"	1	0.76	-0.39	-0.7	0.1	0.23	-2	-2.1	-0.37	-0.83	-1.54	-2.1	-2.02	-0.41	-0.21	0.29	0.09	-1.15		0.27		-0.12	-0.14	-0.01	-0.26	0.01	-0.98	-0.33	-0.22	1.25	-0.04	0.12	0.02	-0.42	-0.24	-0.41
GENE1353X	5800	" PTPRO -  Protein tyrosine phosphatase, receptor type, O"	1	0.24	-0.3	-0.39	0.26	0.19	-2.04	-1.67	-0.54	-0.66	-0.83	-2.36	-2.04	0.22	0.62	-0.27	0.08	-0.39	-2.34	0.02	0.15	-0.03	-0.15	-0.25	-0.24	-0.3	-0.24	-0.15	0.24	1.85	0.37	0.38	0.63	0.29	-0.59	-0.28
GENE1192X	1840	 DTX1 -  Deltex homolog 1 (Drosophila)	1	0.04	-0.25	-0.01	0.2	0.02	-1.31	-1.26	-0.32	-0.48	-0.46	-2.12	-2.21	-0.25	-0.42	-0.2	-0.07	-0.12	-1.47	0.57	0.08	-0.26	-0.39	-0.65	0.15	0.14	-0.23	-0.06	0.19	2	0.29	0.13	0.21	0.03	-0.17	-0.34
GENE1531X	10800	 CYSLTR1 -  Cysteinyl leukotriene receptor 1	1	0.33	0.02	-0.25	-0.17	0.05	-1.73	-1.77	-0.13	-0.13	-0.23	-1.42	-2.37	-0.99	-0.61	0.11	-0.08	-0.63	-2.02	-0.27	1.07	-0.11	-0.68	-0.73	-0.49	-0.12	-0.42	0.85	-0.29	0.6	0.22	0.43	0.17	-0.17	0.59	0.14
GENE1733X	55640	" FLVCR2 -  Feline leukemia virus subgroup C cellular receptor family, member 2"	1	0.44	-0.37	-0.19	0.14	-0.03	-2.5	-2.51	0.04	0.06	-0.64	-2.34	-3.61	-1.14	-1.52	-0.03	-0.34	-1.06	-2.89	0.14	0.2	-0.02	-0.31	-0.67	0.08	-0.2	-0.42	0.2	0.33	1.22	0.07	-0.05	-0.71	-0.54	-0.36	-0.48
GENE92X	729230	 CCR2 -  Chemokine (C-C motif) receptor 2	1	0.34	-0.3	-0.35	0.13	0.16	-3.44	-3.76	-0.02	-0.31	-1.18		-3.8	-1.91	-2.32	-0.31	0.2	-0.5	-3.76	-0.1	0.72	0.44	-1.05	-1.36	0.02	0.51	-0.63	0.11	-0.08	2.29		-0.18	-0.86	-1.08	-0.03	0.1
GENE1476X	929	 CD14 -  CD14 molecule	1	-0.05	-0.15	-0.26	0.33	0.13	-1.99	-2.2	-0.83	-0.14	-0.34	-1.05	-2.2	-1.02	-0.78	-0.33	-0.24	-0.33	-1.99	-0.01	0.38	-0.14	-0.23	-0.54	-0.8	0.39	0.23	0.66	-0.21	1.34	0.72	0.21	0.01	0.18	0.17	-0.55
GENE93X	51466	 EVL -  Enah/Vasp-like	1	-0.35		-0.45	0.01	0.78	-2.82	-3.03	0.47	0.6	-0.56	-2.14	-3.37	-1.95	-1.65	0.05	0.48	-1.27	-2.93	0.21		-0.16	-0.05	-0.22	-0.92	0.09	-0.65	-0.77	-0.44		0.01	-1.64	-0.12	-0.59	-0.2	-0.44
GENE94X	219972	 MPEG1  -  macrophage expressed 1	1	-0.17	-0.53	-0.79	0.55	0.94	-4.72		0.27	0.54	-0.88	-2.46	-5.21	-0.32	-0.94	-0.42	-0.18	-0.51	-3.61	0.68	0.05	-0.09	-0.63	-1.36	-0.57	-0.06	-0.96	-1.64	-0.85		-0.85	-0.37	-1.73	-0.95	-0.69	-0.9
GENE892X	89849	 ATG16L2 -  ATG16 autophagy related 16-like 2 (S. cerevisiae)	1	0.05	0.17	-0.63	0.26	0.15	-1.65	-0.93	-0.02	-0.31	-0.37	-1.52	-1.93	0.21	-0.1	0.21	0.13	-0.21	0.2	-0.43	0.15	0.04	0.27	-0.02	-0.36	-0.11	0.18	-0.24	-0.23	0.36	0.31	0.1	0.2	0.04	0.07	-0.48
GENE1770X	28232	" SLCO3A1 -  Solute carrier organic anion transporter family, member 3A1"	1	-0.3	0.26	-0.25	0.32	-0.03	-2.75	-2.64	-0.1	-0.09	-0.13	-1.9	-2.71	0.05	-0.49	-0.05	0.14	-0.04	-0.23	0.18	-0.38	0.31	-0.1	0.32	0.63	-0.09	-0.62	-0.79	-0.15	0.08	1.18	0.99	0.04	-0.19	-0.23	1.24
GENE435X	5738	 PTGFRN -  Prostaglandin F2 receptor negative regulator	1	0	-0.17	0.06	0.03	0.07	-1.9	-3.64	-0.35	-0.34	-0.92	-2.89	-4.37	-0.98	-0.66	-0.48	-0.13	-0.13	-1.43	0.24	-0.19	0.05	-0.09	-1.23	-1.66	0.19	-0.19	-0.5	-0.58	0.9	0.29	-0.56	-0.1	-0.31	-0.2	-0.19
GENE776X	6279	 S100A8 -  S100 calcium binding protein A8	1	-0.27	0.01	-0.86	0.93	0.21	-1.49	-4.38	0.45	0.39	0.38	-0.99	-2.22	-0.1	-0.4	0.45	0.3	0.39	-1.84	-0.25	-0.34	0.26	0.32	-0.08	-0.25	0.29	0.02	-0.24	-0.54	0.22	0.19	1.47	0.25	0.49	0.63	0.56
GENE85X	6035	" RNASE1 -  Ribonuclease, RNase A family, 1 (pancreatic)"	1	-0.36	0.3	-0.69	0.45	0.32	-1.7		-0.01	0.18	0.32	-2.2	-3.35	-0.37	-0.75	0.15	0.11	0.22	-1.35	-0.57	-0.31	-0.03	0.92	0.46	-0.25	-0.75	-0.57	-0.23	-0.29	-0.22	0.05	0.03	0.23	0.2	0.03	0.08
GENE1127X	2357	 FPR1 -  Formyl peptide receptor 1	1	-0.53	-0.36	-0.25	0.58	0.56	-2.82	-3.09	0.41	0.27	0.21	-2.11	-3.32	-0.82	-1.62	0.76	0.58	0.2	-1.89	-0.02	-0.12	-0.1	0.24	0.22	-0.63	-0.2	-0.11	-0.08	-0.61	0.31	0.11	0.34	-0.02	0.09	-0.12	-0.55
GENE86X	6283	 S100A12 -  S100 calcium binding protein A12	1	0.28	0.23	-1.07	0.03	0.51	-1.76	-3.22	-0.11	-0.07	-0.57	-2.12	-2.46	-0.91	-2.15	-0.25	0.47	0.1		-0.27		-0.1	0.37	0.82	0.34	0.39	-0.28	0.15	-0.46		0.8		0.28	0.43	-0.05	0.53
GENE1555X	5175	 PECAM1 -  Platelet/endothelial cell adhesion molecule	1	0.04	-0.21	-0.47	0.36	0.28	-2.26	-1.46	0.14	-0.16	-0.91	-0.95	-2.06	-0.56	-0.31	0.04	0	-0.2	-0.54	-0.04	0.2	0.02	-0.18	-0.58	-0.73	0.18	0.14	0.34	0.13	0.01	0.28	0.18	-0.17	0.07	0.22	0.11
GENE792X	10462	" CLEC10A -  C-type lectin domain family 10, member A"	1	0.29	0.4	-1.97	0.82	0.48	-3.07	-4.26	-0.32	0.48	-0.31	-1.54	-3.39	0.71	0.1	0.56	0.35	0.12	-0.45	-1.07	0.59	-0.22	0.71	0.71	0.66	0.39	0.48	0.6	-0.03	0.46	-0.37	0.72	0.89	0.7	0.58	0.58
GENE1539X	1307	" COL16A1 -  Collagen, type XVI, alpha 1"	1	-0.31	-0.26	-0.03	0.35	0.25	-2.81	-2.59	-0.17	-0.58	-0.96	-2	-3.78	0.09	0.2	-0.5	-0.27	-0.3	0.41	-0.02	-0.05	-0.34	0.41	-0.56	-0.47	-0.27	0.59	0.47	-0.49	-0.47	-0.18	0.32	-0.01	0.27	0.43	-0.28
GENE764X	444	 CLVS1 -  Clavesin 1	1	-0.44	-0.14	0.02	0.46	0.12	-2.52	-2.29	-0.61	-0.53	-0.58	-2.09	-3.46	-0.14	0.16	-0.51	-0.1	-0.05	0.31	-0.38	-0.18	0.04	0.53	-0.63	-0.04	-0.03	0.57	0.23	-0.26	1.44	-0.73	0.32	-0.14	0.55	0.61	-0.42
GENE1099X	6252	 RTN1 -  Reticulon 1	1	0.06	0.06	-0.72	0.21	0.41	-3.24	-3.67	0.3	-0.15	-0.99	-3.31	-3.91	-0.04	-1.15	-1.41	-0.12	-1.59	-1.43	-0.74	0.69	-0.13	0.18	0.17	-0.05	0.23	-0.09	-0.35	-0.35	1.34	0.14	0.31	-0.63	0.18	-0.02	0.17
GENE1797X	5788	" PTPRC -  protein tyrosine phosphatase, receptor type, C"	1	-0.01	0.13	-0.4	0.25	0.05	-1.72	-2	-0.1	-0.17	-0.37	-1.75	-1.97	0.21	-0.26	-0.17	0.22	-0.15	-0.21	-0.04	0.39	-0.22	-0.13	0.69	0.06	-0.43	0.15	0.34	0.11	0.75	0.04	0.19	-0.44	-0.43	-0.01	-0.11
GENE556X	10320	 IKZF1 -  IKAROS family zinc finger 1 (Ikaros)	1	-0.13	-0.07	-0.11	0.24	0.06	-2.2	-1.66	-0.29	-0.47	-0.5	-1.8	-2.65	0.25	0.38	-0.27	-0.33	-0.18	0.86	-0.03	0.59	-0.22	-0.28	-0.36	-0.47	-0.03	0.19	0.46	0.04	1.93	0.18	0.79	0.09	-0.22	-0.18	-0.41
GENE595X	157	" CRYBB2P1 -  Crystallin, beta B2 pseudogene 1"	1	-0.12	-0.06	0.09	-0.09	0.18	-2.1	-2.36	0.12	-0.29	-0.25	-0.96	-2.6	0.44	0.21	-0.01	0.07	-0.02	0.05	-0.01	0.45	0.1	-0.54	-0.6	-0.1	-0.46	0.49	0.34	-0.01	2.05	0.59	1.18	0.48	0.08	-0.03	-0.31
GENE483X	157	" ADRBK2 -  adrenergic, beta, receptor kinase 2"	1	-0.09	-0.16	0.15	-0.12	0.22	-2.69	-3.08	0.07	-0.34	-0.23	-1.3	-3.32	0.61	0.27	0.08	0.14	-0.01	0.05	-0.01	0.45	0.1	-0.54	-0.6	-0.1	-0.46	0.49	0.34	-0.01	2.05	0.59	1.18	0.48	0.08	-0.03	-0.31
GENE1228X	23498	" HAAO -  3-hydroxyanthranilate 3,4-dioxygenase"	1	-0.25	-0.19	0.14	0	0.29	-1.59	-1.91	-0.16	-0.16	-0.27	-0.54	-1.67	-0.11	0.22	-0.19	0.21	-0.12	0.07	0.24	0.07	-0.29	-0.03	-0.18	-0.71	0.27	0.26	0.17	0.13	2.09	0.6	0.4	0.61	0.25	0.01	0.22
GENE89X	3957	" LGALS2 -  Lectin, galactoside-binding, soluble, 2"	1	-0.11	-0.31	-0.18	0.39	0.21	-3.13		-0.13	0.31	-0.34	-1.14	-3.55	-0.39	-0.37	-0.42	-0.28	-0.36	-1.13	-0.08			0.08	-0.41	0.75	0.56	0.79	1.35	-0.14		1	0.77	-0.08	0.06	0.75	0.29
GENE1371X	6503	 SLA -  Src-like-adaptor	1	-0.1	0.22	-0.41	0.16	0.13	-3.24	-3.13	-0.75	-0.63	-1.31	-2	-3.11	0.23	0.27	-0.82	-0.17	-0.89	-1.22	-0.02	0.13	-0.05	-0.08	-0.16	-0.43	0.09	0.14	0.31	-0.09	2.33	0.24	0.64	0.09	-0.03	0.05	0.25
GENE1316X	216	" ALDH1A1 -  Aldehyde dehydrogenase 1 family, member A1"	1	-0.28	0.39	-0.15	0.04	-0.01	-2.47	-3.8	-0.51	-0.33	-0.91	-1.78	-3.59	-0.28	0.36	-0.2	-0.32	-0.18	-1.16	0.1	0.26	-0.26	-0.11	-0.22	-0.47	-0.11	0.02	0	0.24	0.77	0.27	0.14	-0.19	0.15	1.3	-0.11
GENE1121X	64218	" SEMA4A -  Sema domain, immunoglobulin domain (Ig), transmembrane domain (TM) and short cytoplasmic domain, (semaphorin) 4A"	1	-0.09	-0.1	-0.29	0.12	0.36	-3.21	-3.6	-0.16	-0.18	-0.32	-1.67	-3.25	0.93	-0.49	-0.27	0.26	0.17	0.3	-0.24	-0.23	-0.25	0.73	0.47	-0.37	0.39	0.81	1.24	0.46	0.69	0.79	0.98	0.89	0.86	0.87	0.06
GENE1790X	4689	" NCF4 -  Neutrophil cytosolic factor 4, 40kDa"	1	0.13	-0.22	0.03	0.14	-0.09	-3.03	-2.47	-0.21	-0.39	-0.78	-1.88	-3.36	0.1	0.26	-0.21	-0.56	-0.33	-0.86	0.08	-0.19	0.17	-0.06	0.7	0.22	-0.34	0.56	1	1.02	1	1.29	1.27	1.15	0.58	0.23	-0.04
GENE935X	57721	 METTL14 -  methyltransferase like 14	1	-0.16	-0.25	-0.4	0.35	0.44	-3.94	-3.45	-0.21	-0.26	-0.7	-2.04	-3.17	0.48	0.49	-0.17	0.25	-0.24	-1.25	-0.32	0.14	-0.23	0.42	0.79	-0.15	-0.45	0.98	1.43	0.29	0.82	0.65	1.28	0.71	-0.34	0.21	0.19
GENE1872X	3903	 LAIR1 -  Leukocyte-associated immunoglobulin-like receptor 1	1	-0.19	0.14	-0.25	0.17	0.07	-2.42	-2.61	-0.49	-0.09	-0.44	-2	-2.1	0.17	0.1	0.03	0.12	0.2	-0.5	-0.45	0.15	0	0.29	0.6	0.3	0.13	0.32	0.34	0.07	0.15	0.26	0.47	0.49	0.31	-0.18	-0.01
GENE1554X	55016	 MARCH1 -  membrane-associated ring finger (C3HC4) 1	1	0.04	-0.03	-0.6	0.56	0.02	-4.78	-4.7	-0.96	-0.69	-0.19	-3.09	-4.54	-0.35	-1.09	-0.34	0.07	-0.25	-1.08	-0.29	-0.04	0.04	0.29	0.29	-0.02	-0.17	0.01	0.1	-0.5	0.52	-0.04	0.25	-0.08	0.06	0.17	-0.21
GENE1706X	4332	 MNDA -  Myeloid cell nuclear differentiation antigen	1	-0.57	-0.22	-0.16	0.61	0.34	-3.8	-4.53	0.26	-0.2	-0.27	-2.48	-3.61	-0.28	-0.61	0.21	0.39	0.26	-2.1	0.04	0.07	-0.13	0.02	0.37	0.05	-0.05	-0.06	0.21	0.2	0.17	0.42	0.49	0.09	-0.2	-0.29	-0.31
GENE1331X	240	 ALOX5 -  Arachidonate 5-lipoxygenase	1	-0.05	-0.32	-0.23	0.16	0.34	-3.14	-4.04	-0.54	-0.11	-0.7	-2.16	-3.02	-0.97	-1.27	-0.2	-0.11	-0.25	-1.67	0.08	0.13	-0.41	0.22	0	-0.41	-0.08	0.03	0.16	-0.31	1.13	0.22	0.34	0	-0.26	-0.03	-0.16
GENE1329X	1536	" CYBB -  Cytochrome b-245, beta polypeptide"	1	-0.15	-0.07	-0.49	0.55	0.06	-2.56	-3.86	-0.62	-0.02	-1.03	-1.69	-3.06	-0.11	-0.64	0.27	0.13	-0.07	-0.65	-0.06	0.42	-0.17	-0.05	0.13	0.04	0.06	0.25	0.44	0.67	1.54	0.29	0.44	0.4	-0.02	0.19	-0.01
GENE1339X	10129	 FRY -  furry homolog (Drosophila)	1	-0.41	0.22	-0.32	0.18	0.31	-3.69	-3.71	0.43	-0.24	-0.53	-1.75	-3.4	-0.03	-1.25	0.19	0.05	-0.61	-1.3	0.41	-0.2	0.09	-0.16	-0.26	0.26	0.44	-0.15	-0.26	0.18	1.43	0.58	-0.19	0.21	0.08	-0.31	-0.41
GENE1248X	128346	 C1orf162 -  Chromosome 1 open reading frame 162	1	-0.01	-0.03	-0.69	0.47	0.28	-2.52	-2.27	-0.13	-0.08	-0.22	-1.41	-2.11	-0.41	-0.07	-0.17	0.29	0.23	-1.43	-0.26	0.06	-0.52	0.73	0.51	0.01	0.6	0.43	0.52	0.39	1.8	0.45	1.21	0.3	0.25	0.13	0.41
GENE1360X	10383	" TUBB2C -  Tubulin, beta 2C"	1	-0.03	-0.37	-0.18	0.51	0.08	-1.74	-2.62	0.04	-0.02	0.11	-0.87	-2.2	-0.53	-0.53	0.07	0.05	0.18	-1.58	-0.29		-0.24	0.52	-0.05	-0.17	-0.36	0.41	0.24	0.5	1.2	0.23	0.88	-0.22	0.4	-0.03	
GENE229X	2203	" FBP1 -  Fructose-1,6-bisphosphatase 1"	1	-0.54	-0.39	0.17	0.35	0.43	-1.82	-3.28	0.11	-0.21	0.14	-0.76	-3.1	-0.47	0.09	0.32	-0.52	0.3	-0.48	-0.68	1.03	-0.26	-0.09	-0.25	-0.04	0.49	0.56	0.96	0.86	1.88	0.41	1.4	1	0.85	0.62	1.23
GENE288X	9450	 LY86 -  lymphocyte antigen 86	1	-0.18	-0.17	-0.1	0.14	0.24	-1.48	-2.79	-0.05	-0.08	-0.18	-0.41	-2.2	0.1	0.06	-0.19	-0.15	-0.16	-0.49	-0.25	0.68	-0.3	-0.14	0.41	0.23	-0.01	0.44	0.64	-0.07	0.66	0.4	1.07	0.51	0.07	0.25	0.52
GENE1634X	6653	" SORL1 -  Sortilin-related receptor, L(DLR class) A repeats-containing"	1	-0.01	-0.12	0	-0.01	0.13	-1.31	-1.97	-0.02	-0.17	-0.25	-0.76	-1.88	-0.24	-0.51	-0.08	0.13	-0.21	-0.35	-0.2	0.55	-0.08	-0.15	0.18	0	0	0.11	0.44	0	0.52	0.42	0.62	0.38	0.22	0.11	0.56
GENE1527X	2644	 GCHFR -  GTP cyclohydrolase I feedback regulator	1	-0.68	0.14	0.1	0.15	0.28	-2.33	-2.25	0.2	0.09	0.4	-0.5	-2.41	-0.12	0.35	0.04	0.03	0.34	-0.6	0.05	0.01	-0.26	0.2	0.26	-0.04	0.57	0.65	0.74	0.95	1.33	1.2	1.18	1.16	0.48	0.42	0.09
GENE561X	100132437	 LOC100132437  -  similar to hCG1989297	1	-0.31	-0.3	0.22	0.26	0.14	-2.7	-3.03	0.21	0.28	0.41	-1.05	-3.25	0.09	0.32	-0.38	0.01	0.59	0.09	-0.13	-0.55	-0.04	0.72	0.6	-0.28	0.32	0.6	0.53	-0.16	1.48	0.53	0.83	0.49	0.43	0.05	-0.1
GENE930X	8437	 RASAL1 -  RAS protein activator like 1 (GAP1 like)	1	-0.38		0.07	0.24	0.08	-1.7	-2.78		-0.48	-0.12	-2.41	-3.57	-0.04	-0.03	-0.27	0.04	0.24	-0.16	-0.08	0.67	-0.81	0.21	0.33	0.08	0.25	0.57	0.49	0.54	2.36	0.28	0.75	0.34	0.21	0.35	0.51
GENE610X	2859	 GPR35 -  G protein-coupled receptor 35	1	-0.37		0.05	0.36	-0.05	-2.24	-2.59	-0.65	-0.15	-0.18	-2.16	-3.12	-0.24	-1.03	-0.29	-0.27	0.3	0.04	-0.3	0.37	-0.25	0.19	-0.3	0.47	0.46	0.22	0.22	1.02	2.07	0.25	0.77	0.93	0.25	0.05	0.18
GENE1651X	2533	 FYB -  FYN binding protein (FYB-120/130)	1	0.02	-0.02	0.13	0.32	-0.4	-2.18	-2.34	-0.34	-0.72	-0.67	-1.69	-2.75	0.15	-0.19	-0.13	-0.22	-0.46	0.73	-0.11	-0.22	-0.05	0.35	0.5	-0.29	-0.26	0.28	0.23	0.21	0.66	0.71	0.64	0.65	0.28	0	-0.16
GENE1639X	6656	 SOX1 -  SRY (sex determining region Y)-box 1	1	-0.08	-0.3	0.11	0.21	0.07	-2.7	-2.2	0.21	-0.69	-0.56	-2.08	-2.57	0.51	0.64	0.04	-0.55	-0.25	0.21	0.19	-0.6	0.1	0.3	0.49	0.69	0.02	0.37	0.41	0.55	0.41	1.1	0.49	0.37	0.35	0.06	0.08
GENE1661X	1439	" CSF2RB -  Colony stimulating factor 2 receptor, beta, low-affinity (granulocyte-macrophage)"	1	0.02	-0.19	-0.24	0.2	0.22	-2.5	-2.67	-0.06	-0.05	-0.48	-2.29	-2.54	0.28	-0.13	0.08	0.28	-0.36	-0.05	-0.25	-0.35	0.19	0.4	0.28	-0.02	0.01	0.23	0.07	0.59	-0.41	1.04	0.91	0.9	0.83	-0.32	-0.34
GENE1006X	55803	 ADAP2 -  ArfGAP with dual PH domains 2	1	0.28	0.18	-0.13	-0.4	0.15	-2.57	-1.73	0.09	-0.29	-0.42	-1.63	-2.27	-0.19	-0.88	-0.07	0.3	-0.35	-1.08	-0.01	0.25	0.06	-0.17	-0.36	-0.39	0.21	0.14	0.01	0.02	0.99	0.3	0.32	0.21	-0.12	-0.27	-0.15
GENE1619X	945	 CD33 -  CD33 molecule	1	-0.03	-0.19	-0.28	0.24	0.27	-1.48	-1.69	-0.15	0.03	-0.57	-1.48	-2.52	-0.25	-0.51	-0.37	-0.29	-0.21	-1.16	-0.11	1.04	-0.32	-0.3	-0.19	0.23	0.2	0.02	0.23	0.11	1.11	0.14	0.41	0.39	-0.17	-0.04	0.52
GENE1314X	4064	 CD180 -  CD180 molecule	1	-0.07	-0.15	-0.64	0.49	0.38	-1.82	-2.27	-0.5	-0.53	-1.24	-2.02	-2.35	0.02	0	-0.19	-0.24	-0.29	-2.07	-0.46	0.08	0.01	0.28	0.08	-0.02	-0.11	0.03	0.13	-0.34	0.73	0.13	0.43	0.01	-0.01	-0.47	0.35
GENE470X	27439	" CECR6 -  Cat eye syndrome chromosome region, candidate 6"	1	-0.12	-0.36	-0.39	0.12	0.73	-2.89	-3.39	0.2	-0.78	-0.87	-2.82	-2.99	-0.01	-1.3	-0.32	-0.15	-0.01	-2.36	0.07	0.18	-0.3	0.05	0.12	-0.09	-0.13	-0.23	0.16	-1.02	1.06	-0.73	0.45	-0.62	-0.05	-0.21	-0.27
GENE87X	944	 TNFSF8 -  Full length insert cDNA clone ZC64D04	1	-0.18	0.08		-0.23	0.34	-2.03	-1.73	-0.8	-0.29	-1.01	-2.45	-2.42	-0.86	-0.89	-0.72	0.13	-0.34		-0.11	0.36	-0.16	-0.08	0.31	0.22	-0.34	-0.2	0.04	-0.84		-0.28	-0.15	-0.14	-0.21	-0.35	-0.09
GENE1036X	286336	" FAM78A -  Family with sequence similarity 78, member A"	1	-0.16	-0.24	-0.47	0.17	0.46	-1.95	-2.14	-0.76	-0.23	-1.55	-1.97	-2.42	0.23	-0.22	-0.9	-0.77	-0.7	0.09	-0.19	0.17	-0.25	0.27	0.79	0.15	-0.35	0.53	0.35	-0.06	1.12	0.42	0.78	0.21	0.11	-0.14	0.11
GENE88X	27239	 GPR162 -  G protein-coupled receptor 162	1	-0.22	0.19	-0.35		0.38	-1.1	-2.08	-0.14	-0.38	-0.79	-1.6	-2.12	0.67	0.06	-0.26	-0.5	-0.22	0.35	-0.35		-0.26	0.61		-0.52	0.14	0.34	0.06	-0.19	1.65	0.22	0.62	-0.13	-0.16	-0.03	-0.47
GENE643X	3055	 HCK -  hemopoietic cell kinase	1	-0.51	-0.32	-0.24	0.65	0.42	-3.6	-4.62	0.25	-0.4	-0.21	-1.92	-2.99	0.54	0.14	-0.22	-0.23	0.23	0.3	-0.3	0.47	-0.03	-0.14	-0.75	-0.94	-0.37	-0.51	-0.24	-0.59	1.23	-0.05	2.47	-0.54	-0.49	-0.38	-0.41
GENE630X	23312	 DMXL2 -  Dmx-like 2	1	0.38	-0.15	-0.65	0.29	0.13	-3.21	-3.78	0.13	0.13	-0.42	-1.65	-3.64	0.83	0.69	0.47	0.24	-0.11	1.46	-0.73	0.87	-0.18	0.03	0.1	0.21	0.23	0.17	-0.1	-0.64	0.76	0.26	0.69	-0.19	-0.2	-0.17	0.6
GENE1130X	80150	 ASRGL1 -  Asparaginase like 1	1	-0.44	-0.28	0.2	0.4	0.11	-2.82	-2.41	-0.32	-0.18	-0.52	-1.58	-2.56	0.08	0.44	-0.07	-0.36	0.04	0.92	-0.2	0.46	0.12	-0.49	-0.73	0.5	-0.45	-0.35	-0.29	0.34	1.14	-0.35	0.41	-0.57	-0.94	-0.51	0.07
GENE1805X	7099	 TLR4 -  Toll-like receptor 4	1	-0.25	-0.12	0.01	0.34	0	-2.9	-2.47	-0.78	0.24	-0.75	-2.39	-2.93	0	-0.27	-0.07	0.17	0.64	-0.98	-0.41	-0.09	0.09	0.41	1.85	1.69	0.09	0.22	0.12	0.82	-0.01	0.81	0.89	0.31	0.08	-0.01	-0.71
GENE90X	284021	 C17orf60 -  Chromosome 17 open reading frame 60	1	-0.17	0.41	-0.17		-0.05	-3.04	-2.96	-1.07	0	-0.94	-2.15	-3.31	-0.2	-1.23	-0.38	-0.04	-0.12	-0.88	-0.21		-0.56	0.78		1.25	0.07	0.4	0.88	1.14	0.13	1.5	2.67	0.72	0.57	0.52	0.27
GENE1834X	57447	 NDRG2 -  NDRG family member 2	1	-0.17	-0.14	0.02	0.16	0.11	-1.47	-1.82	-0.13	-0.39	-0.14	-1.43	-1.65	-0.48	-0.41	0.04	-0.18	0.07	-0.91	-0.13	0.05	-0.31	0.39	1.1	0.63	0.47	0.77	1.01	0.78	0.28	0.99	0.96	1.04	0.87	0.31	0.41
GENE912X	8698	 S1PR4 -  sphingosine-1-phosphate receptor 4	1	-0.5	0.37	-0.98	0.71	0.41	-2.27	-1.58	-0.9	-0.41	-1.06	-2.82	-2.68	-0.21	-1.43	-0.33	-0.48	0.07	-1.73	-1.07	-0.2	0.26	1.01	0.95	0.62	0.69	0.58	0.47	0.77	0.08	0.77	0.73	1.03	0.94	0.7	0.29
GENE1719X	54947	 LPCAT2 -  Lysophosphatidylcholine acyltransferase 2	1	-0.03	-0.14	-0.14	0.06	0.12	-1.37	-2.03	0.04	0.04	-0.29	-1.26	-1.91	-0.44	0.04	0.1	0.2	0.02	-0.72	0.38	-0.65	-0.02	0.29	0.68	0.74	0.27	0.25	-0.39	1.48	1.39	0.56	0.95	0.54	-0.13	0.19	0.41
GENE1693X	19	" ABCA1  -  ATP-binding cassette, sub-family A (ABC1), member 1"	1	-0.03	-0.01	-0.06	-0.06	0.17	-1.25	-1.67	0.09	-0.05	0.04	-0.79	-1.73	-0.22	-0.31	0.03	0.25	0.51	-0.11	0.38	-0.12	-0.06	-0.2	1.06	0.74	0.17	-0.01	0.12	1.75	1.61	1.27	1.24	0.13	-0.16	0.1	1.06
GENE340X	8564	 KMO -  Kynurenine 3-monooxygenase (kynurenine 3-hydroxylase)	1	-0.48	0.03	-0.22	0.5	0.07	-1.2	-2.85	0.17	-0.87	-0.5	-1.14	-1.78	0.44	-1.43	-0.07	-0.32	0.19	0.18	-0.3	-0.2	-0.21	0.71	0.75	0.3	0.11	0.22	0.63	0.64	1.69	0.89	0.97	0.15	0.05	0.32	0.26
GENE1388X	3856	 KRT8 -  Keratin 8	1	0.19	-0.06	-0.03	-0.08	0	-2.17	-2.34	-0.42	-0.38	-0.5	-1.51	-1.85	-0.42	-0.35	-0.21	-0.02	-0.51	-1.24	1.02	-0.41	-0.28	-0.34	-0.73	0.88	-0.4	-0.4	-0.44	0.64	1.03	0.03	-0.23	0.63	-0.34	-0.51	-0.64
GENE295X	4973	 OLR1 -  Oxidized low density lipoprotein (lectin-like) receptor 1	1	0	0.09	-1	0.73	0.19	-3.21	-4.58	-2.14	0.67	0.12	-2.02	-3.67	-0.51	-1.19	-2.7	0.16	-0.11	-2.05	-0.17	0.14	-0.16	0.19	0.25	-0.5	-0.77	-0.43	-0.05	-0.1	-0.19	-0.34	0.09	-0.37	-0.04	-0.55	-0.62
GENE1606X	344	 APOC2 -  Apolipoprotein C-II	1	-0.17	-0.14	0.1	0.28	-0.06	-0.79	-1.7	-0.2	-0.39	0.05	-0.34	-1.97	0.25	0.42	-0.24	-0.27	0.27	-0.29	-0.26	0.38	-0.15	0.02	0.32	0.46	0.06	0.3	0.61	1	0.66	1.33	0.92	0.9	0.19	-0.2	-0.25
GENE1125X	6039	" RNASE6 -  Ribonuclease, RNase A family, k6"	1	0.16	-0.38	-0.11	0.11	0.22	-1.27	-1.82	-0.14	-0.22	-0.25	-1.38	-3.44	-0.42	-0.3	0.07	0.25	-0.18	-1.7	-0.1	1.19	0.03	-1.12	-0.2	0.33	0.5	0.54	1.19	1.63	2.62	1.4	1.16	2.52	0.94	0.88	0.38
GENE932X	719	 C3AR1 -  Complement component 3a receptor 1	1	0.06	-0.31	-0.14	0.23	0.16	-2.23	-1.7	-0.28	-0.07	-1.26	-2.14	-2.88	-0.59	-0.14	0.12	0.01	-0.25	-2.93	0.34	-0.27	-0.19	-0.01	0.12	0.48	0.48	0.42	0.3	0.97	1.5	2.36	2.69	0.1	0.24	0.22	-0.12
GENE191X	199	 AIF1 -  Allograft inflammatory factor 1	1	-0.37	-0.69	0.18	0.55	0.33	-2.24	-3.39	0.35	0.19	0.08	-0.92	-3.9	-0.53	-0.81	-0.84	-0.7	-0.32	-2.62	-0.05	1.25	-0.81	-0.42	-0.38	-0.2	-0.57	-0.75	0.8	-0.55	0.28	-0.03	0.96	-0.19	-1.11	-0.5	0.79
GENE486X	79887	 PLBD1 -  Phospholipase B domain containing 1	1	-1.08	-0.23	0.24	0.44	0.65	-1.61	-3.41	0.3	0.15	0.23	-1.21	-3.08	0.09	0.11	-0.4	-0.57	0.01	-0.08	0.01	0.27	-0.49	0.21	-0.46	0.46	-0.67	-0.99	0.32	-0.69	0.57	-0.77	0.39	-0.13	-0.14	-0.45	-0.14
GENE636X	26030	" PLEKHG3 -  Pleckstrin homology domain containing, family G (with RhoGef domain) member 3"	1	-0.31	-0.06	0.39	0.05	-0.05	-1.63	-1.43	0.24	-0.62	-0.13	-1.4	-2.36	0.27	-0.24	0.02	-0.41	-0.35	1.17	-0.17	-0.49	0.03	0.62	-0.56	-1.07	0.03	0.52	0.15	-0.14	0.34	0.32	0.45	0.67	0.99	-0.3	0.8
GENE1056X	57493	 HEG1 -  HEG homolog 1 (zebrafish)	1	-0.25	-0.32	0.64	0.08	-0.13	-0.83	-1.06	0.11	-0.73	-0.48	-1.61	-2.27	-0.03	0.1	0.16	-0.41	-0.04	0.78	-0.54	-0.42	0.35	0.6	-0.5	-0.67	0.29	0.53	0.08	-0.16	-1.42	0.62	0.34	0.71	0.59	0.13	0.65
GENE81X	10457	 GPNMB -  Glycoprotein (transmembrane) nmb	1	-0.07	-0.26	0.26	0.17	-0.12	-1.51		-1.24	-0.12	-1.36	-1.46	-2.93	0.21	0.26	-0.06	0.09	0.33	0.95	0.15	-0.25	0.36	-0.25	-0.22	-0.48	0.9	-0.34	-0.8	0.12	-1.05	1.03	0.34	0.39	0.35	0.54	1.78
GENE924X	3988	" LIPA -  lipase A, lysosomal acid, cholesterol esterase"	1	-0.26	-0.27	-0.13	0.32	0.34	-1.12	-2.13	-0.49	0.09	-0.61	-0.82	-1.83	0.95	1.12	0.43	0.06	0.31	0.64	-0.26	-0.05	0.56	-0.25	-0.76	-0.54	0.2	-0.16	-0.65	-0.63	-1.44	1.84	0.89	0.45	0.28	0.25	1.46
GENE1075X	4313	" MMP2 -  Matrix metallopeptidase 2 (gelatinase A, 72kDa gelatinase, 72kDa type IV collagenase)"	1	-0.19	-0.21	-0.23	0.26	0.37	-1.11	-1.82	0.24	0.21	0.08	-0.28	-1.73	0.79	1.08	0.32	0.46	0.69	0.68	0.08	-0.28	-0.09	0.29	-0.21	-0.44	-0.06	-0.17	-0.3	-0.14	-0.92	0.75	1.08	-0.16	0.09	-0.22	0.03
GENE289X	217	 ALDH2 -  Aldehyde dehydrogenase 2 family (mitochondrial)	1	-0.38	-0.33	0.28	0.23	0.21	-0.79	-2.79	0.03	0.01	0.13	-0.56	-2.18	0.89	0.96	0.42	0.37	0.59	1.45	-0.03	-0.26	-0.25	0.54	0.44	0.75	0.17	0.5	0.18	-0.14	-1.15	0.43	0.25	0.36	0.54	0.16	0.55
GENE495X	2051	 EPHB6 -  EPH receptor B6	1	-0.49	-0.34	0.31	0.32	0.22	-1.24	-1.75	-0.07	-0.25	-0.3	-0.87	-1.97	-0.02	0.25	-0.33	-0.15	-0.07	-0.34	-0.02	-0.29	-0.54	0.84	0.44	-0.92	-0.25	0.32	0.01	-0.51	-1.24	0.16	0.27	0.31	0.33	-0.55	-1.07
GENE1172X	1519	 CTSO -  Cathepsin O	1	0.43	-0.11	-0.54	0.15	0.06	-2.72	-2.07	-0.51	0.04	-0.51	-1.68	-2.72	-0.11	-0.62	0.11	0.48	0.16	-0.02	-0.03	-0.05	-0.01	0.09	-1.55	-1.89	-0.11	-0.53	-0.94	-2.23	-1.54	-0.51	-0.04	-1.27	-0.96	-0.39	-0.34
GENE1318X	10154	 PLXNC1 -  Plexin C1	1	0.12	-0.11	-0.09	0.09	-0.02	-2.83	-2.4	-0.2	-0.15	-0.74	-1.25	-2.5	0.19	-0.19	0.27	0.26	-0.19	0.46	0.27	-0.12	-0.16	0.01	-1.19	-1.93	0.01	-0.12	-0.57	-0.92	-1.33	0.48	0.02	-0.34	-0.38	-0.5	-0.54
GENE95X	9466	" IL27RA -  Interleukin 27 receptor, alpha"	1	-0.1	-0.22	-0.44	0.58	0.16	-2.02	-1.85	-0.13	-0.49	-0.83	-1.82	-3.17	-0.28	-0.61	-0.2	-0.21	-0.45	-0.7	0.63	0.19	-0.31	-0.52	-1.27	-0.25	-0.12	-0.38	-0.12	-0.49		-0.74	-0.38	-0.61	-0.55	-0.12	-0.28
GENE1241X	8673	 VAMP8 -  vesicle-associated membrane protein 8 (endobrevin)	1	-0.41		0.02	0.25	0.14	-2.58	-2.02	0.12	-0.13	-0.14	-1.53	-3.76	-0.32	-0.08	-0.09	-0.14	-0.01	-1.21	0.32	-0.4	-0.09	0.16	-1.21	-1.03	0.22	0.04	-0.2	-1.16	-1.35	-0.1	-0.03	1.73	0.46	-0.22	-0.67
GENE815X	11326	 VSIG4 -  V-set and immunoglobulin domain containing 4	1	0.1	-0.25	-0.47	0.31	0.31	-1.77	-2.12	-0.12	-0.07	-0.88	-1.08	-1.91	-0.56	-0.31	0.13	0.41	0.34	-0.77	0.01	-0.37	-0.34	0.34	-0.21	-0.68	0.09	-0.12	-0.32	-0.38	-0.49	0.04	-0.44	0.22	0.11	-0.4	-0.54
GENE1237X	54453	 RIN2 -  Ras and Rab interactor 2	1	0.09	-0.02	-0.76	0.56	0.13	-2.81	-2.6	-0.09	0.03	-0.64	-2.21	-3.09	0.51	0.07	0.23	0.65	-0.16	0.01	0.61	-1.32	0.57	0.13	-0.32	-0.9	1.8	0.15	-1.08	-0.3	-0.63	-0.01	-0.36	-0.09	0.46	0.35	0.33
GENE905X	22846	 VASH1 -  Vasohibin 1	1	0.56	0.15	-1.1	0.34	0.06	-2.16	-1.92	0.18	-0.29	-0.37	-1.82	-2.03	0.19	-0.07	-0.11	0.3	-0.34	-1.05	0.12	-0.58	0.47	-0.01	-0.79	-0.03	0.24	-0.4	-0.33	-1.01	-0.58	-0.21	-0.57	-0.15	-0.62	-0.16	-0.09
GENE922X	11213	 IRAK3 -  Interleukin-1 receptor-associated kinase 3	1	0.42	-0.69	-0.98	0.44	0.47	-2.95	-3.56	0.21	-0.47	-0.82	-2.68	-3.32	0.35	-0.68	0.52	0.6	-0.29	-0.76	-0.1	-0.64	-0.04	0.77	-0.43	0.04	0.05	-0.02	-0.94	-1.69	-1.1	-0.22	0.1	-0.33	-0.22	0.13	-0.27
GENE1784X	10863	 ADAM28 -  ADAM metallopeptidase domain 28	1	0.03	0.18	-0.76	0.28	0.27	-1.61	-1.92	0.03	0.45	-0.38	-1.75	-1.9	0.2	-0.37	0.12	0.43	-0.36	-0.97	-0.2	0.21		0.04	-0.07	-0.41	-0.29	-0.63	-0.53	-0.82	-0.93	-0.31	-0.22	-0.27	-0.43	-0.37	-0.58
GENE83X	80231	 CXorf21 -  chromosome X open reading frame 21	1	0.3	0.46	-1.01	0.66	-0.41	-2.66	-2.85	-0.85	-0.22	-0.69	-2.72	-3.46	0.45	-0.62	0.06	0.1	-0.61	-0.59	0.31	0.26	0.02	-0.58	-0.81	-0.24	-0.31	-0.85	-0.27	-0.61		-0.03	-0.01	-0.27	-0.19	-0.43	-0.56
GENE1550X	4363	" ABCC1  -  ATP-binding cassette, sub-family C (CFTR/MRP), member 1"	1	0.34	0.02	-0.48	0.1	0.02	-2.71	-2.11	-0.28	-0.67	-1.09	-3.27	-3.13	0.58	1.16	-0.15	-0.05	-0.51	-0.22	0.01	-0.75	0.46	0.28	0.12	0.09	-0.12	-0.08	-0.4	0.17	-0.54	0.28	0.09	0.34	0.55	-0.19	-0.34
GENE1211X	55314	 TMEM144  -  transmembrane protein 144	1	0.45	-0.06	-1.1	0.29	0.42	-3.51	-3.01	0.04	-0.34	-1	-3.1	-2.93	0.61	-0.24	0.07	0.11	-0.3	-0.93	-0.46	-0.52	0.68	0.31	-0.69	0.02	0.18	-0.22	-0.37	0.03	-0.31	0.1	-0.25	0.93	0.89	0.19	-0.02
GENE1744X	23357	 ANGEL1 -  Angel homolog 1 (Drosophila)	1	-0.22	0.11	-0.36	0.32	0.16	-2.77	-2.88	-0.62	-0.41	-0.94	-2.37	-2.76	0.54	0.38	-0.21	-0.14	-0.15	-0.09	-0.83	0.31	0.03	0.49	-0.41	0.13	0.24	0.09	-0.34	-0.97	-0.95	0.09	-0.16	0.46	0.3	0.06	0.02
GENE1401X	84329	 HVCN1 -  hydrogen voltage-gated channel 1	1	0.56	-0.62	-0.18	0	0.25	-2.55	-2.24	0.24	-0.29	-0.41	-1.8	-2.4	0.33	0.08	0.2	-0.06	0.04	0.45	-0.47	0.57	-0.2	0.1	-0.27	-0.11	-0.26	-0.46	-0.47	-0.61	-0.66	-0.62	-0.58	-0.37	-0.62	-0.48	-0.29
GENE1674X	4048	 LTA4H -  Leukotriene A4 hydrolase	1	-0.23	-0.12	-0.14	0.33	0.16	-2.79	-2.28	-0.11	-0.27	-0.8	-1.89	-2.35	0.36	0.73	-0.19	-0.02	-0.26	0.58	-0.22	-0.15	0.14	0.22	-0.41	-0.39	0.24	0.05	-0.37	-0.2	-0.7	-0.6	-0.59	-0.33	-0.25	-0.25	-0.14
GENE921X	7059	 THBS3 -  Thrombospondin 3	1	-0.23	-0.14	0.23	0.11	0.05	-1.73	-1.49	-0.01	0	-0.5	-1.1	-1.71	0.03	0.15	-0.07	0	-0.12	0.77	0	-0.11	-0.08	0.2	-0.49	-0.81	-0.03	-0.1	-0.69	-0.47	-1.15	-0.4	-0.68	-0.16	-0.27	-0.63	-0.58
GENE1154X	11253	" MAN1B1 -  mannosidase, alpha, class 1B, member 1"	1	-0.13	-0.12	0.2	0	0.06	-1.65	-0.94	-0.09	-0.29	-0.49	-0.96	-1.63	0.11	0.08	-0.46	-0.31	-0.22	0.48	-0.06	0.07	-0.09	0.07	-0.1	-0.67	-0.15	-0.51	-0.48	-0.28	-0.77	-0.08	-0.63	-0.12	-0.24	-0.64	-0.6
GENE255X	64759	 TNS3 -  Tensin 3	1	-0.27	-0.1	0.27	0.29	-0.17	-2.5	-1.93	-0.25	-0.41	-0.71	-2.85	-4.23	-0.03	-0.09	-0.28	-0.35	0.2	0.17	-0.28	-0.71	0.62	0.37	-1.35	-1.35	-0.1	-0.31	-0.38	-1.11	-2.56	0.22	-0.94	0.12	0.05	-0.19	-1.1
GENE998X	6717	 SRI -  Sorcin	1	-0.16	-0.01	-0.08	0.12	0.13	-1.95	-1.19	0.08	0.08	-0.22	-1.33	-1.88	0.32	0.43	0.22	-0.17	0.01	-0.43	-0.11	-0.18	-0.12	0.42	0.05	-0.68	0.22	0.3	-0.22	-0.38	-1.93	0.22	-0.95	0.48	0.27	0.04	-0.36
GENE394X	10591	 C6orf108 -  Chromosome 6 open reading frame 108	1	-0.27	0.19	-0.6	0.48	0.2	-2.76	-2.33	-0.24	-0.02	0	-1.61	-3.4	-0.03	0.12	-0.2	-0.22	0.03	-1.06	0.05	-0.59	0.34	0.19	0.03	-0.51	0.57	0.19	-0.03	-0.63	-2.41	-0.18	-0.83	0.49	0.38	0.4	-0.29
GENE818X	5176	" SERPINF1  -  serpin peptidase inhibitor, clade F (alpha-2 antiplasmin, pigment epithelium derived factor), member 1"	1	-0.32	-0.1	-0.13	0.35	0.2	-1.88	-2.44	-0.3	-0.21	-0.24	-1.39	-2.31	-0.1	0.46	0.07	-0.16	0.2	-0.57	-0.19	0.12	-0.02	0.1	0.18	-1.09	0.12	-0.1	-0.3	-0.23	-2.08	0.31	-0.17	0.19	0.38	0.34	0.04
GENE1524X	5547	 PRCP -  Prolylcarboxypeptidase (angiotensinase C)	1	0.02	-0.22	0.09	0.12	-0.01	-2.85	-3.11	-0.03	-0.47	-0.64	-2.13	-3.53	0.01	0.06	-0.16	-0.61	-0.4	-0.26	0.25	-0.25	-0.05	0.05	-0.14	-0.65	-0.03	0.52	-0.58	-0.24	-2.05	0.22	-0.24	0.31	0.19	-0.67	-0.05
GENE883X	1593	" CYP27A1 -  Cytochrome P450, family 27, subfamily A, polypeptide 1"	1			-0.61	0.64	-0.02	-2.76	-4.29	0.05		-0.34	-2.08	-4.01	0.29	0.44	-0.18	-0.14	0.54	0.25	0.18	-0.96	0.44	0.33	-0.31	-1.04	-0.22	-0.18	-0.35	-0.01	-2.11	0.41	0.36	0.53	0.54	-0.02	-0.13
GENE726X	2517	" FUCA1 -  Fucosidase, alpha-L- 1, tissue"	1	-0.16	0.04	-0.42	0.45	0.07	-3.99	-4.83	0.35	0	-0.39	-2.72	-4.69	0.1	0.31	0.02	0.13	0.08	-0.8	0.69	-1.2	0.62	-0.1	-0.85	-0.75	-0.03	-0.44	-0.88	-0.89	-1.81	-0.58	-0.6	0.25	0.22	-0.58	-0.47
GENE1342X	3597	" IL13RA1 -  Interleukin 13 receptor, alpha 1"	1	-0.21	-0.04	0.18	0.09	-0.03	-2.86	-2.33	0.23	0.07	-0.17	-1.51	-3.33	0.42	-0.04	0.24	0.05	0.12	0.51	0.18	-0.29	-0.17	0.27	-0.28	-0.57	0.09	0.05	-0.24	-0.43	-0.83	0.04	-0.8	0.07	-0.04	-0.17	-0.17
GENE1198X	1806	 DPYD -  Dihydropyrimidine dehydrogenase	1	-0.3	-0.02	-0.36	0.31	0.35	-1.71	-1.99	0.26	0.14	-0.35	-1.76	-2.8	0.1	0.37	0.26	-0.01	-0.45	0.33	0.31	-0.23	-0.08		-0.25	-1.09	-0.07	0.01	-0.56	-0.43	-0.87	0.32	0.45	-0.48	-0.21	-0.34	-0.32
GENE529X	8714	" ABCC3 -  ATP-binding cassette, sub-family C (CFTR/MRP), member 3"	1	-0.32	0.12	-0.51	0.49	0.23	-1.95	-1.35	0.4	0.04	-0.11	-1.44	-2.79	0.46	0.35	0.23	0.08	-0.05	0.45	0	0.22	-0.19	-0.03	-0.28	-0.92	-0.09	0.23	0.05	-0.35	-1.66	0.25	0.41	0.12	0.14	0.46	0.54
GENE1465X	8031	 NCOA4 -  nuclear receptor coactivator 4	1	-0.3	-0.35	0.32	0.36	-0.03	-1.71	-1.75	0.11	0.11	-0.04	-1.46	-1.86	-0.15	-0.08	0.22	-0.03	0.19	0.32	0.04	-0.52	-0.01	0.49	-0.02	-0.78	0.07	0.77	-0.26	-0.28	-1.34	0.03	0.71	0.39	-0.18	-0.06	-0.22
GENE1037X	408	" ARRB1 -  Arrestin, beta 1"	1	-0.14	0.03	-0.99	0.8	0.32	-3.09	-2.51	-0.35	-0.06	-0.35	-1.9	-3.31	0.1	-0.24	-0.07	-0.43	0.62	0.24	-0.43	0.47	-0.09	0.04	-0.65	-1.03	0.06	0.25	0.01	-0.56	-0.47	-0.55	-0.63	0.2	-0.09	0.2	-0.17
GENE1393X	2629	" GBA -  Glucosidase, beta, acid"	1	-0.24	-0.06	0.17	0.28	-0.18	-2.76	-2.08	-1.16	-0.59	-1.03	-1.89	-3.7	-0.34	-0.15	-0.73	-0.7	-0.01	-0.51	0.22	-0.22	-0.04	0.04	-0.35	-0.89	0.06	-0.07	-0.67	-0.51	-0.92	0.32	-0.02	0.29	0	-0.3	0.48
GENE1641X	9839	 ZEB2 -  Zinc finger E-box binding homeobox 2	1	0.25	-0.09	0.12	-0.03	-0.26	-1.76	-1.72	-0.23	-0.29	0.1	-2.02	-2.66	-0.27	-0.31	-0.23	0.12	0.32	-0.22	0.38	-0.59	0.1	0.11	0.32	-0.4	-0.08	-0.12	-0.34	-0.06	-0.81	0.55	0.13	0.15	0	-0.83	-0.43
GENE851X	9294	 S1PR2 -  sphingosine-1-phosphate receptor 2	1	-0.28	-0.28	0.22	0.23	0.1	-1.54	-1.91	0.01	-0.21	-0.27	-2.09	-3.47	-0.39	-0.6	-0.2	0.15	-0.06	-1.04	0.27	-0.81	0.3	0.24	-0.19	-0.78	-0.09	-0.08	-0.16	-0.42	-0.47	0.62	-0.04	0.06	0.19	-0.14	-0.71
GENE1375X	3108	" HLA-DMA -  Major histocompatibility complex, class II, DM alpha"	1	-0.27	-0.35	0.05	0.38	0.01	-1.19	-2.15	-0.19	0.07	0.22	-0.73	-1.74	0.13	0	-0.14	-0.16	0.05	-0.33	-0.01	-0.18	0.09	0.14	-0.55	-0.62	0.03	-0.22	0.04	-1.06	-0.86	-0.18	0.12	0.01	-0.08	0.13	-0.28
GENE691X	166	 AES -  Amino-terminal enhancer of split	1	-0.52	-0.17	0.32	0.12	0.24	-1.41	-2.13	0.15	0.06	-0.01	-0.86	-2.56	0.17	0.08	-0.12	0.23	0.28	-0.66	-0.14	0.26	-0.27	0.15	0.06	-0.19	-0.07	0.6	0.72	-0.23	-1.43	0.16	0.6	0.46	0.53	0.58	0.15
GENE208X	143458	 LDLRAD3  -  low density lipoprotein receptor class A domain containing 3	1	-0.1	-0.05	-0.49	0.36	0.27	-1.37	-2.41	-0.03	-0.37	0.12	-0.57	-2.51	-0.23	0.55	0.33	0.12	0.62	0.17	-0.19	-0.33	-0.09	0.62	-0.12	-0.65	0.25	0.38	0.29	-0.32	-1.53	0.33	1.03	0.37	0.22	0.49	0.41
GENE745X	11343	 MGLL -  Monoglyceride lipase	1	-0.11	-0.05	-0.24	0.33	0.06	-1.26	-1.68	-0.06	-0.13	0.37	-0.52	-1.99	0.38	0.19	0.13	-0.28	0.37	-0.51	-0.53	-0.02	0.24	0.31	0.64	-0.12	0	0.07	0.32	-0.52	-0.93	0.57	0.84	0.2	0.25	0.23	0.44
GENE187X	91304	 C19orf6 -  Chromosome 19 open reading frame 6	1	-0.25	0.42	-0.78	0.56	0.07	-2.12	-2.75	-0.38	0	0.2	-1.29	-2.84	0.54	0.07	-0.1	0.05	0.47	0.52	-1.47	-0.1	1.09	0.48	0.37	-1.18	1.3	0.38	-0.05	-0.49	-2.96	0.71	0.45	0.34	0.08	0.15	0.22
GENE405X	2706	" GJB2 -  gap junction protein, beta 2, 26kDa"	1	-0.4	0.23	-0.53	0.53	0.15	-0.95	-1.27	-0.02	0.23	0.07	-1.71	-2.07	0.81	0.03	0.16	0.08	0.24	-0.22	-0.04	-0.68	0.5	0.21	0.48	-0.42	0.25	0.3	-0.28	-0.11	-2.61	0.17	0	0.32	0.05	0.09	-0.44
GENE210X	55161	 TMEM33 -  Transmembrane protein 33	1	-0.25		-0.07	0.12	0.19	-0.74	-1.07	0.1	0.22	-0.19	-1.45	-3.09	0.25	0.71	0.64	0.1	0.22	0.23	0.25	0.06	-0.54	0.24	0.38	0.03	0.01	0.18	-0.13	-0.41	-2.15	0.08	-0.72	0.04	0	0.04	-0.22
GENE909X	56255	 TMX4 -  Thioredoxin-related transmembrane protein 4	1	-0.16		0.15	0.14	-0.08	-1.6	-0.84	-0.37	-0.15	-0.19	-1.21	-1.73	-0.11	0.17	-0.06	-0.05	0.2	0.3	0.17	-0.06	-0.3	0.19	0.22	-0.27	0.19	0.24	0	0.04	-1.26	0.22	-0.9	0.08	-0.27	-0.18	-0.2
GENE574X	11344	" TWF2 -  Twinfilin, actin-binding protein, homolog 2 (Drosophila)"	1	-0.34	0.39	-0.66	0.6	0.03	-2	-1.11	0.11	0.02	0.03	-2	-2.62	-0.19	-0.14	-0.15	-0.33	0.03	-0.5	-0.27	-0.21	0.2	0.27	1.2	0.64	-0.11	0.03	-0.43	0.01	-1.13	-0.42	-1.1	-0.18	-0.41	-0.65	-0.77
GENE672X	25824	 PRDX5 -  Peroxiredoxin 5	1	-0.29	-0.13	0.09	0.27	0.06	-2.06	-1.16	-0.3	-0.25	-0.12	-1.17	-2.24	-0.41	0.04	-0.1	-0.44	-0.24	-0.42	-0.47	-0.22	0.26	0.44	0.27	0.54	0.28	0.14	-0.23	-0.4	-0.83	0.04	-0.77	0.43	0.11	-0.07	0.06
GENE84X	6633	 SNRPD2 -  Small nuclear ribonucleoprotein D2 polypeptide 16.5kDa	1	-0.36	0.5	-0.89	0.76	0	-2.08	-1.54	0.01	-0.25	-0.21	-2.25	-2.89	-0.55	0.03	-0.13	-0.93	0.18	-1.51	-0.47	-0.99	0.68	0.77	0.43	0.05	0.32	0.25	0.01		-0.89	-0.05	-0.65	0.7	0.47	-0.31	0
GENE469X	221035	 REEP3 -  Receptor accessory protein 3	1	-0.25	-0.2	-0.01	0.03	0.41	-1.25	-0.84	0.22	-0.2	-0.5	-2.13	-2.3	0.06	0.41	0.04	-0.18	0.04	-0.4	-0.06	-0.76	0.48	0.35	-0.46	-0.91	-0.06	0.04	-0.49	-0.09	-2.35	0.21	-0.68	0.42	0.28	-0.52	0.37
GENE1088X	128240	 APOA1BP -  Apolipoprotein A-I binding protein	1	-0.08	-0.16	0.21	0.11	-0.08	-1.77	-0.62	-0.19	-0.41	-0.34	-1.21	-1.57	-0.19	-0.19	-0.21	-0.72	-0.19	-0.49	-0.35	0.13	0.04	0.19	-0.6	-0.79	-0.07	-0.19	-0.45	-0.83	-2.04	0.02	-0.68	1.42	0	-0.46	0.29
GENE704X	85359	 DGCR6L -  DiGeorge syndrome critical region gene 6-like	1	-0.17	0.04	0.19	0.21	-0.29	-2.24	-1.46	-0.57	-0.56	-0.35	-1.33	-1.86	-0.56	-0.47	-0.7	-0.93	-0.04	-0.46	-0.39	-0.14	0.16	0.38	-0.66	-0.83	0.14	-0.01	-0.22	-0.72	-1.88	0.01	-0.65	0.2	-0.18	-0.41	0.04
GENE11X	126374	 WTIP -  Wilms tumor 1 interacting protein	1	0.11	-0.06	0.15	-0.04	-0.18	-2.72	-1.22	-0.59	-0.48	-0.49		-1.97	-0.23	-0.01	-0.3	-0.65	-0.24	-0.28	0.34	-0.71	0.22	0.17	-0.54	-0.52	0.44	-0.19	-0.37	0	-1.52	0	-1.09	0.54	0.44	-0.01	0.86
GENE537X	51693	 TRAPPC2L -  Trafficking protein particle complex 2-like	1	0.14	-0.26	0.13	0.05	-0.04	-1.74	-1.19	-0.1	-0.42	-0.2	-0.96	-1.78	-0.49	-0.13	-0.3	-0.69	-0.52	-1.02	0.59	-0.52	-0.06	-0.02	-1.04	-0.8	0.08	1.11	-0.41	-0.61	-1.76	0.16	-1.22	0.51	0.28	-0.09	-0.2
GENE652X	5638	 PRRG1 -  Proline rich Gla (G-carboxyglutamic acid) 1	1	-0.14	0	-0.49	0.58	0.06	-2.25	-2.95	0.62	0.41	-0.45	-0.93	-2.58	0.21	0.22	0.58		-0.46	-1.39	-0.79	0.56	-0.14	0.35	0.75	0.26	0.4	0.46	0.06	-1.21	-1.52	1.75	0.85	0.61	0.75	0.5	-0.01
GENE82X	55303	" GIMAP4 -  GTPase, IMAP family member 4"	1	-0.24	0.6	-1.26	0.37	0.53	-1.87	-2.39	-0.34	-0.27	-0.81		-2.08	0.72	0.1	0.09	-0.01	-0.7	-0.63	-0.67	-0.25	0.3	0.63	0.54	0.67	0.23	-0.35	-0.51	-0.97	-1.06	0.1	0.11	0.43	0.13	0.11	-0.29
GENE1068X	79626	" TNFAIP8L2 -  tumor necrosis factor, alpha-induced protein 8-like 2"	1	-0.1	0.27	-1.01	0.63	0.35	-1.58	-1.17	-0.5	-0.56	-1.76	-2.54	-3.16	0.33	-0.4	-0.06	-0.38	-0.34	-1.58	0.22	-0.4	0.37	-0.01	0.18	0.44	0.41	0.24	0.15	0.37	-0.25	0.52	0.27	0.57	0.24	0.25	-0.17
GENE1309X	55794	 DDX28 -  DEAD (Asp-Glu-Ala-Asp) box polypeptide 28	1	0.06	0.15	-0.31	0.34	-0.07	-2.07	-1.46	-0.31	-0.01	-1.6	-2.03	-2.56	-0.47	-0.54	-0.33	0.12	0.24	-0.83	-0.12	-0.19	0.25	0.06	-0.48	0.48	0.31	0.24	0.14	-0.29	0.21	-0.43	-0.16	0.42	0.47	0.83	-1.05
GENE1731X	56342	 PPAN -  Peter pan homolog (Drosophila)	1	-0.32	0.2	-0.15	0.21	0.06	-1.39	-1.78	-0.69	-0.42	-0.47	-1.64	-1.81	-1.04	-0.78	-0.32	-0.19	0.14	-1.41	-0.09	0.56	-0.28	-0.09	0.13	0.12	0.27	0.2	-0.36	-0.4	-0.84	-0.52	-0.52	0.27	0.14	0.39	-0.51
GENE945X	8536	 CAMK1 -  Calcium/calmodulin-dependent protein kinase I	1	-0.09	0.05	-0.3	0.37	-0.02	-2.34	-2.37	-0.47	-0.57	-0.93	-2.44	-3.17	-1.01	-0.71	-0.49	-0.36	-0.34	-2.48	0.56	-0.56	0.09	-0.08	-0.46	-0.44	-0.16	-0.55	-0.78	-0.25	-1.24	-0.94	-1.54	-0.15	0.22	-0.26	-0.62
GENE866X	84890	 ADO -  2-aminoethanethiol (cysteamine) dioxygenase	1	-0.1	-0.02	0.07	0.02	0.01	-2.46	-0.92	0.01	-0.33	-0.57	-3.44	-4.76	-0.76	-0.3	0.14	0.07	-0.95	-2.92	0.11	-0.72	0.47	0.14	-0.33	0.05	-0.24	0.38	-0.38	-0.7	-1.82	0.25	-0.16	0.52	0.82	0.1	-1.91
GENE493X	359948	 IRF2BP2  -  interferon regulatory factor 2 binding protein 2	1	0.01	-0.14	0.1	-0.09	0.11	-1.61	-0.81	0.52	0.4	-0.72	-2.52	-3.19	0.06	0.05	0.17	0.23	-0.96	-1.91	0.02	-0.61	0.34	0.49	-0.78	0.09	0.7	1.08	0.41	-0.41	-0.81	0.29	-0.53	0.59	1.25	0.41	-1.98
GENE500X	10161	 LPAR6 -  Lysophosphatidic acid receptor 6	1	0.14	0.18	-0.11	-0.57	0.36	-2.51	-3.19	0.21	0.52	-1.08	-2.58	-4.99	0.25	-0.35	0.48	0.41	-0.27	-2.04	-0.32	-0.17	0.33	0.1	-0.63	-1.82	0.06	-0.51	-0.13	-1.49	-0.28	0.82	0.88	0.16	-0.19	-0.23	-2
GENE433X	8540	 AGPS -  Alkylglycerone phosphate synthase	1	-0.65	-0.05	-0.02	0.41	0.29	-1.98	-2.21	0.53	0.13	-0.55	-1.66	-3.7	0.13	0.02	-0.12	-0.47	-0.26	-2.42	-0.25	0.64	-0.19	0.13	-0.51	-0.96	-0.35	-0.29	0.3	-1.47	0.04	-0.47	-0.42	-0.52	-0.27	-0.56	-0.64
GENE516X	23406	 COTL1 -  Coactosin-like 1 (Dictyostelium)	1	-0.15	-0.17	0.09	0.05	0.18	-0.84	-1.64	0.35	-0.06	-0.03	-0.99	-1.84	-0.27	-0.29	-0.08	0.05	-0.19	-0.8	0.21	-0.28	0.08	0	-0.26	-0.9	-0.13	-0.28	-0.34	-0.11	-1.45	-0.15	-1.02	0.33	0.26	-0.36	-0.15
GENE943X	374655	 ZNF710 -  Zinc finger protein 710	1	-0.08	-0.3	-0.16	0.16	0.36	-1.68	-1.08	0.56	-0.66	-0.28	-0.89	-2.13	-0.06	-0.48	0.05	-0.24	-0.62	-0.94	0.26	-0.17	-0.09	0	0.43	-0.26	0.67	0.1	0.05	-0.05	-0.83	1.48	1.23	0.19	-0.2	0.16	0.1
GENE744X	23078	 KIAA0564 -  KIAA0564	1	-0.1	0.28	-0.08	0.05	-0.15	-1.64	-1.23	-0.11	-0.21	-0.67	-1.53	-2.24	0.06	0.4	0.03	-0.62	-0.5	-0.74	-0.19	0.03	-0.23	0.4	-0.28	-0.74	0.07	0.06	0.04	-0.67	-1.57	-0.06	1.02	0.17	-0.1	-0.53	-0.61
GENE1296X	5698	" PSMB9 -  proteasome (prosome, macropain) subunit, beta type, 9 (large multifunctional peptidase 2)"	1	-0.2	-0.08	-0.16	0.16	0.26	-2.01	-1.18	0.28	-0.04	-0.32	-0.91	-0.88	0.24	0.28	0.15	-0.31	-0.78	0.09	0	0.12	-0.35	0.27	-1.29	-1.09	0.16	0.16	-0.28	-0.78	-1.84	1.8	2.08	-0.23	-0.09	-0.18	0.28
GENE1352X	9246	 UBE2L6 -  Ubiquitin-conjugating enzyme E2L 6	1	-0.34	-0.08	0.15	0.22	0.03	-2.31	-1.31	-0.5	-0.18	-0.6	-1.29	-1.36	0.93	0.56	-0.25	-0.13	-0.45	0.02	-0.18	0.03	0.14	0.01	-1.73	-1.01	0.15	-0.19	-1	-2.65	-3	2.12	2.72	0.02	-0.25	-0.02	0.25
GENE1761X	4615	 MYD88 -  Myeloid differentiation primary response gene (88)	1	-0.36	-0.22	0.18	0.22	0.17	-2.6	-1.6	0.09	-0.18	-0.48	-1.99	-2.74	0.05	0.09	-0.41	0.2	-0.12	-1.44	-0.17	0.02	0.15	0.01	-1.51	-1.11	0.02	-0.39	-0.76	-2.55	-2.25	2.63	2.56	-0.3	-0.39	-0.6	0.64
GENE1827X	10346	 TRIM22 -  Tripartite motif-containing 22	1	0.02	-0.31	-0.28	0.18	0.32	-1.72	-1.69	0.32	-0.11	-0.55	-1.72	-1.99	0.42	-0.17	0.16	0.13	-0.56	-0.36	0.32	-0.21	-0.23	0.13	-1.61	-1.69	-0.02	0.14	-0.73	-1.64	-1.13	2.05	1.74	0.54	-0.14	-0.27	-0.15
GENE1672X	55337	 C19orf66 -  chromosome 19 open reading frame 66	1	-0.37	-0.03	0.29	-0.03	0.16	-1.6	-0.85	-0.07	-0.23	-0.23	-1.11	-1.89	0.08	0.11	0.14	-0.21	-0.18	-0.2	0.41	-0.26	-0.19	0.04	-0.6	-0.83	0.01	0.05	-0.38	-0.76	-1.15	2.08	2.02	0.14	-0.25	-0.55	-0.76
GENE1689X	9641	" IKBKE -  Inhibitor of kappa light polypeptide gene enhancer in B-cells, kinase epsilon"	1	0.03	-0.01	-0.41	0.22	0.18	-0.99	-0.26	-0.34	-0.29	-0.38	-1.51	-1.93	0.26	0.03	-0.2	-0.36	-0.39	-1.37	-0.08	-0.01	-0.01	0.1	-0.2	-0.59	-0.09	-0.12	-0.33	-0.48	-0.29	1.86	1.89	0.15	-0.04	-0.13	0.64
GENE1535X	25801	" GCA -  Grancalcin, EF-hand calcium binding protein"	1	-0.16	-0.16	0.05	0.05	0.23	-1.51	-1.42	0.11	0.12	-0.37	-1.87	-2.17	-0.17	0.18	0.22	0.08	-0.26	-0.99	0.26	-0.16	-0.23	0.08	-0.17	-0.71	0.01	-0.07	-0.31	-0.51	-0.79	1.15	1.81	-0.22	-0.03	0.41	0.53
GENE1421X	5696	" PSMB8 -  Proteasome (prosome, macropain) subunit, beta type, 8 (large multifunctional peptidase 7)"	1	0.02	0.08	-0.42	0.38	-0.05	-1.92	-1.71	-0.2	-0.14	-0.54	-2.12	-2.54	-0.21	-0.51	-0.36	-0.46	-0.79	-0.9	-0.16	-0.35	0.53	-0.01	-1.08	-0.24	-0.16	-0.62	-0.73	-0.96	-1.32	1.59	1.76	-0.31	-0.23	0.22	0.73
GENE933X	10791	 VAMP5 -  vesicle-associated membrane protein 5 (myobrevin)	1	-0.24	-0.05	0.01	0.26	0.01	-2.4	-2.02	0.11	-0.22	-0.18	-1.68	-2.55	-1.14	-0.98	0.15	-0.46	-0.52	-1.16	-0.2	-0.47	0.34	0.34	-0.61	-1.79	0.09	0.06	-0.22	-1.12	-2.81	1.9	1.97	0.4	0.05	-0.25	0.09
GENE1050X	10581	 IFITM2 -  interferon induced transmembrane protein 2 (1-8D)	1	-0.12	-0.11	-0.08	0.1	0.21	-1.82	-1.95	-0.26	-0.12	-0.1	-0.82	-2.33	-0.5	-0.4	-0.07	-0.03	0.06	-1.33	-0.3	-0.31	0.31	0.3	-0.93	-1.88	0.43	-0.08	-0.48	-1.73	-3.47	1.18	1.79	0.33	0.21	0.07	-0.3
GENE1431X	25840	 METTL7A -  methyltransferase like 7A	1	0.02	0.05	-0.16	0.19	-0.09	-2.5	-2.02	-0.63	-0.11	-0.55	-1.76	-2.73	0.19	-0.02	-0.19	-0.21	-0.13	-1.89	-0.42	-0.09	0.43	0.08	-1.16	-2.1	0.17	-0.16	-0.61	-1.85	-2.22	0.8	0.33	0.14	0.09	0.71	0.02
GENE1478X	25840	 METTL7A  -  methyltransferase like 7A	1	0.02	0.05	-0.16	0.19	-0.09	-2.5	-2.02	-0.63	-0.11	-0.55	-1.76	-2.73	0.19	-0.02	-0.19	-0.21	-0.13	-1.89	-0.42	-0.09	0.43	0.08	-1.16	-2.1	0.17	-0.16	-0.61	-1.85	-2.22	0.8	0.33	0.14	0.09	0.71	0.02
GENE1216X	117854	 TRIM6 -  Tripartite motif-containing 6	1	-0.1	0.3	-0.39	0	0.2	-1.85	-1.39	-0.13	0.03	-0.05	-1.41	-1.94	0.44	0.15	-0.03	-0.23	0.01	-0.39	-0.78	-0.17	0.46	0.4	-0.1	-0.82	0.48	0.09	-0.21	-1.23	-1.63	1.43	0.24	0.26	0.08	0.3	-0.14
GENE765X	3460	 IFNGR2 -  interferon gamma receptor 2 (interferon gamma transducer 1)	1	-0.33	0.02	-0.06	0.2	0.17	-1.78	-1.18	0.1	0	-0.24	-2.08	-2.49	0.92	0.68	-0.1	0.12	0.43	-0.17	-0.3	0	-0.07	0.37	-0.09	-0.63	0.39	0.92	0.52	-0.61	-1.96	2.01	1.1	0.32	0.78	0.96	1.09
GENE1238X	8767	 RIPK2 -  Receptor-interacting serine-threonine kinase 2	1	-0.37	-0.05	0.15	0.18	0.1	-1.79	-1.32	0.1	-0.01	-0.2	-2.13	-2.6	0.91	0.74	0.07	0.01	0.74	-0.31	-0.28	-0.21	-0.07	0.57	-0.11	-0.53	0.31	1.33	0.66	-0.28	-1.86	2.02	1.34	0.52	1	1.21	1.21
GENE1337X	8510	 MMP23B -  Matrix metallopeptidase 23B	1	-0.11	0.15	-0.09	0.24	-0.18	-1.39	-1.64	-0.32	-0.19	-0.88	-1.71	-2.46	0.47	-0.23	0.01	-0.41	0.09	0.24	-0.2	-0.81	0.15	0.85	0.21	0.11	0.29	0.4	0	-0.07	-1.44	1.37	1.15	0.7	0.42	0.32	-0.39
GENE598X	57085	 AGTRAP -  Angiotensin II receptor-associated protein	1	-0.53	0.04	0.37	0.15	-0.02	-3.19	-1.37	-0.33	-0.34	-0.33	-1.65	-2.86	0.02	-0.16	-0.26	-0.53	-0.29	-0.08	0.09	-0.6	0.06	0.44	-0.2	-0.22	1.3	0.29	-0.12	-0.34	-1.82	1.48	1.48	0.56	0.19	-0.19	-0.08
GENE1175X	25975	" EGFL6 -  EGF-like-domain, multiple 6"	1	-0.44	0.21	0.22	0.1	-0.09	-2.8	-1.58	-0.37	-0.44	-0.46	-2.17	-2.59	-0.16	-0.44	-0.26	-0.52	-0.39	0.1	0.78	-0.82	-0.02	0.05	-0.58	-0.51	-0.21	-0.42	-0.79	-0.6	-2.21	0.63	0.64	0.38	0.11	0.71	0.12
GENE1626X	4481	 MSR1 -  macrophage scavenger receptor 1	1	-0.36	0.38	0.07	0.12	-0.2	-1.51	-0.97	0.29	-0.33	-0.52	-2.37	-2.21	0.34	0.21	0.02	-0.59	-0.32	0.9	0.34	-0.38	0.26	-0.22	-0.69	-1	-0.23	0.08	-0.52	-1.14	-1.92	1.27	0.99	0.05	0.26	-0.09	0.6
GENE1558X	2118	 ETV4 -  Ets variant 4	1	-0.09	0.01	0.04	0.06	0	-1.69	-1.29	0.07	-0.57	-0.63	-2.12	-2.3	0.27	-0.16	-0.14	-0.22		0.87	0.44	-0.47	0.03	0	-1.3	-1.05	0.34	0.09	-0.61	-1.09	-0.29	1.42	0.94	-0.04	-0.25	0.65	1.05
GENE940X	6892	 TAPBP -  TAP binding protein (tapasin)	1	0.22	0.37	-0.99	0.44	-0.04	-0.78	-0.68	0.03	0.19	0.24	-1.21	-1.41	0.53	0.07	0.26	-0.17	0.3	0.28	-0.63	-0.67	0.65	0.64	0.06	-0.42	0.31	0.52	-0.26	-0.22	-1.14	1.59	1.66	0.51	0.47	0.55	0.87
GENE1240X	6892	 TAPBP  -  TAP binding protein (tapasin)	1	0.22	0.37	-0.99	0.44	-0.04	-0.78	-0.68	0.03	0.19	0.24	-1.21	-1.41	0.53	0.07	0.26	-0.17	0.3	0.28	-0.63	-0.67	0.65	0.64	0.06	-0.42	0.31	0.52	-0.26	-0.22	-1.14	1.59	1.66	0.51	0.47	0.55	0.87
GENE12X	307	 ANXA4 -  Annexin A4	1	-0.04	-0.15	0.11	0.14	-0.05	-2.01	-1.21	-0.33	-0.25	-0.87	-1.24	-1.14	0	0.31	-0.03	-0.12	-0.43	0.19	-0.1	-0.23	-0.29	0.63	-1.19		0.22	-0.04	0.18	-0.75	-2.23	0.74	-0.02	0.54	-0.09	-0.14	-0.36
GENE1285X	7096	 TLR1 -  toll-like receptor 1	1	0.47	-0.15	-0.25	0.11	-0.19	-2	-0.56	-0.53	-0.23	-0.92	-1.76	-1.32	0.1	-0.4	0.08	0.2	-0.03	-0.13	0.25	-0.07	0.11	-0.3	-0.38	-0.51	-0.06	-0.14	-0.2	0.07	0.03	0.41	0.19	0.35	-0.12	-0.34	-0.19
GENE386X	340348	 TSPAN33 -  Tetraspanin 33	1	0.13	-0.5	-0.07	0.42	0.02	-0.67	-2.11	-0.67	-0.12	-0.08	-0.86	-2.08	0.73	0.74	-0.21	0.01	0.29	0.69	-0.13	0.21	-0.01	-0.06	-0.63	0.26	0.11	0.06	0.22	0.95	2.05	1.2	1.81	0.28	0.1	-0.02	0.49
GENE569X	92241	 RCSD1 -  RCSD domain containing 1	1	0.3	-0.05	-0.11	0.09	-0.21	-2.04	-2.77	-1.04	-0.74	-1.63	-1.69	-3.03	0.64	0.29	-0.42	-0.32	-0.67	1.57	0.4	0.61	-0.32	-0.69	-0.14	-0.15	0.07	-0.52	-0.16	1.19	1.03	1.37	3.67	0.32	-0.49	0.24	0.66
GENE1680X	26157	" GIMAP2 -  GTPase, IMAP family member 2"	1	-0.25	-0.07	-0.34	0.3	0.35	-1.11	-0.92	-0.41	-0.66	-0.6	-0.85	-1.65	0.77	0.4	-0.82	-0.51	-0.8	0.09	-0.01	0.26	0	-0.26	-0.18	0.28	0.07	-0.02	0.23	-0.28	-0.48	1.24	2.49	-0.65	-0.16	-0.2	0.22
GENE80X	9050	 PSTPIP2 -  Proline-serine-threonine phosphatase interacting protein 2	1	-0.02	0.1	-0.52	-0.03	0.48	-2.24	-2.4	-0.59	0.32	-0.92	-1.46	-1.67	1.07		-0.71	0.13	0.02	0.34	0.07	0.35	-0.12	-0.29	-0.73	-0.82	-0.17	-0.32	-0.36	-1.61	-0.78	0.56	2.96	-0.57	-0.62	-0.21	0.88
GENE1020X	6775	 STAT4 -  Signal transducer and activator of transcription 4	1	0.15	-0.14	-0.23	0.05	0.18	-1.41	-1.65	-0.18	-0.06	0.03	-0.57	-1.86	0.32	-0.37	-0.19	0.04	0.46	-0.68	0.08	0.04	-0.13	0.01	-0.07	-0.3	-0.4	-0.17	-0.27	-0.87	0.04	-0.12	1.6	-0.13	-0.34	-0.39	-0.22
GENE994X	9056	" SLC7A7 -  Solute carrier family 7 (cationic amino acid transporter, y+ system), member 7"	1	-0.32	-0.29	-0.1	0.47	0.25	-0.94	-1.71	-0.12	0.23	-0.64	-1.57	-2.13	0.17	0.08	0.25	0.43	0.1	-0.06	0.32	-0.36	0.11	-0.07	-0.45	-0.63	-0.28	-0.72	-0.98	-0.3	0.32	0.91	1.13	-0.23	-0.82	-0.58	-0.26
GENE79X	3965	" LGALS9 -  Lectin, galactoside-binding, soluble, 9"	1	-0.27	-0.13	-0.17	0.44	0.15	-0.64	-1.32	0.01	-0.13	-0.04	-0.78	-1.85	0.1	0.19	0.04	0.22	0.34	-0.63	0.61	-0.8	-0.09	0.29	-1.37	-0.08	0.41	-0.39	-0.37	-1.01		1.7	2.54	-0.64	-0.56	-0.11	-0.57
GENE1232X	3587	" IL10RA -  Interleukin 10 receptor, alpha"	1	0.03	-0.07	-0.59	0.35	0.28	-2.29	-2.14	0.05	0.08	0.02	-0.77	-0.58	0.3	-0.54	-0.25	0.22	0.03	0.16	-0.05	0.87	-0.18	-0.29	-0.31	-0.26	-0.37	-0.11	0	-0.44	0.54	0.13	0.47	-0.48	-0.36	-0.41	0
GENE245X	54518	" APBB1IP -  Amyloid beta (A4) precursor protein-binding, family B, member 1 interacting protein"	1	0.01	0.55	-0.69	0.38	-0.25	-2.66	-0.34	-0.51	-0.7	-0.39	-1.58	-2.64	-1.03	-0.43	-0.24	-0.18	-0.31	-2.24	-0.26	-0.09	0.26	0.1	0.71	0.06	-0.11	-0.09	-0.15	-1.01	-0.38	-0.76	-0.57	-0.16	0.21	-0.27	-0.9
GENE231X	91689	 C22orf32 -  Chromosome 22 open reading frame 32	1	0.02	-0.08	0.07	0.03	-0.06	-5.43	-0.31	-0.26	-0.31	-0.4	-1.62	-2.53	-0.65	-0.3	-0.27	-0.32	-0.32	-1.93	0.03	-0.56	0.47	0.07	-0.3	0.12	0.21	-0.29	-0.47	0.02	-0.84	0.54	-0.72	0.63	0.56	0.16	0.67
GENE212X	83442	 SH3BGRL3 -  SH3 domain binding glutamic acid-rich protein like 3	1	-0.24	-0.16	0.27	0.15	-0.04	-3.95	-0.27	0.08	-0.31	0.13	-0.47	-1.09	-0.42	0	-0.34	0.16	0.06	-0.57	-0.44	-0.96	0.58	0.81	-0.32	-0.47	0.24	0.02	0.06	-0.24	-1.71	0.92	-0.17	0.76	0.5		1.17
GENE616X	22904	 SBNO2 -  Strawberry notch homolog 2 (Drosophila)	1	-0.16	-0.26	0.32	0.07	0.03	-2.8	0.02	0.14	-0.82	-0.33	-1.01	-0.23	-0.05	-0.23	-0.19	-0.3	-0.44	0.29	-0.27	-0.9	0.51	0.66	-0.03	-0.03	0.19	0.58	0.36	0.28	0.24	1.64	1.24	0.78	0.95	-0.23	1.54
GENE1679X	1796	" DOK1 -  Docking protein 1, 62kDa (downstream of tyrosine kinase 1)"	1	-0.1	-0.11	-0.18	0.27	0.13	-1.45	-1.03	-0.17	-0.6	-0.55	-1.84	-1.81	-0.31	-0.12	-0.54	-0.01	-0.18	-0.62	0.25	0.01	0.03	-0.29	-2.25	-1.07	0.06	-0.41	-0.76	-1	0.04	0.16	0	-0.6	-0.08	0.06	1.81
GENE1051X	11320	" MGAT4A -  Mannosyl (alpha-1,3-)-glycoprotein beta-1,4-N-acetylglucosaminyltransferase, isozyme A"	1	0.18	-0.24	-0.06	-0.13	0.24	-1.44	-1.33	0.54	0.56	0.46	-0.26	-1.67	-1.12	-0.87	0.41	0.55	-0.2	-1.7	-0.17	0.72	0.11	-0.67	-0.51	-0.59	-0.46	-0.7	-0.29	-0.85	0.06	-0.25	-0.13	-0.84	-0.67	-0.22	-0.58
GENE407X	100131829	 LOC100131829 -  hypothetical protein LOC100131829	1	-0.25	0.58	-0.5	0.15	0.02	-1.11	-1.67	-0.38	-0.69	0.49	-0.72	-1.72	-1.48	-1.41	-0.49	-0.37	-1.21	-1.27	0.38	-0.28	-0.53	0.44	-0.25	0.17	-0.14	-0.4	-0.6	-1.11	0.63	-0.62	-0.39	0.01	0.32	-0.38	
GENE283X	3006	" HIST1H1C -  Histone cluster 1, H1c"	1	-0.51	0.05	-0.04	0.39	0.1	-0.67	-1.2	0.21	-0.14	0.35	0.03	-2.16	-1.03	-1.59	-0.29	-0.56	-0.41	-2.38	0.19	-0.04	-0.38	0.23	-1	-0.62	0.07	-0.11	-0.57	-0.7	0.18	-0.33	0.53	0.01	-0.29	0.01	-0.74
GENE832X	7850	" IL1R2 -  Interleukin 1 receptor, type II"	1	0.09	-0.06	0.13	-0.19	0.07	-0.83	-1.4	0.22	0.4	0.03	-0.69	-1.74	-1.38	-1.39	0.34	-0.1	-0.74	-1.62	0.19	-0.46	-0.24	0.51	0.09	-0.43	0.56	0.51	0.17	-0.46	0.14	0.47	-0.17	0.31	0.69	0.01	-0.54
GENE445X	27436	 EML4 -  echinoderm microtubule associated protein like 4	1	-0.11	0.28	-0.2	0.32	-0.28	-1.11	-1.51	0.15	-0.38	0.04	-0.86	-2.22	-1.33	-1.05	-0.23	-0.34	-0.46	-1.96	0.19	-0.31	0.02	0.1	-0.24	-1.11	-0.05	-0.03	-0.05	-0.27	-1.06	0.2	-0.68	0.43	0.51	0.17	-0.77
GENE627X	80314	 EPC1 -  Enhancer of polycomb homolog 1 (Drosophila)	1	-0.35		-0.23	0.14	0.26	0.39	-0.56	1.19	0.84	1.1	0.61	-0.27	-1.25	-0.95	1.04	0.6	0.18	-1.86	-0.63	0.47	-0.23	0.39	0.19	-0.5	1.37	1.27	1.03	0.38	0.89	0.19	-0.03	1.34	1.59	1.36	-0.15
GENE0X	25934	 NIPSNAP3A -  nipsnap homolog 3A (C. elegans)	1	0.02	0.03	-0.51	0.42	0.05	-1.05	-1.98	-0.07	-0.06	-0.21	-1.12	-1.89	0.64	0.33	-0.3	0.42	0.15	-1.77	0.35	-0.75	0.64	-0.25	-0.73	-0.92	0.57	-1.14	-1.5	-0.98		-0.29	-1.5	-0.16	1.17	-0.5	-1.5
GENE1221X	93436	 ARMC6 -  armadillo repeat containing 6	1	-0.05	-0.04	-0.31	0.27	0.14	-0.34	-0.64	-0.23	-0.5	-0.66	-0.77	-1.36	-0.03	-0.04	-0.23	-0.07	-0.15	-1.72	0.23	0.09	0.23	-0.56	-0.46	-1.13	-0.24	-0.48	-0.96	-0.42	0.2	-0.51	-1.48	0.03	-0.37	-0.44	-1.62
GENE13X	54495	 TMX3 -  Thioredoxin-related transmembrane protein 3	1	0.04	0.26	-0.52	0.29	-0.07	-0.33	-0.6	0.8	-0.3	-1.01	-1.73	-2.52	0.19	0.48	0.06	0	-0.26	-0.65	0.28	-0.8	0.32	0.19	-0.58	-0.67	-0.33	-0.73	-1.39	-1.16		-1.37	-1.63	-0.36	-0.46	-1.34	-1.71
GENE524X	91316	" LOC91316 -  Glucuronidase, beta/immunoglobulin lambda-like polypeptide 1 pseudogene"	1	0.33	0.31	-0.94	0.05	0.25	-0.81	-1.06	0.18	-0.43	-0.66	-0.9	-0.05	-0.27	-0.33	-0.44	-0.06	-0.6	-0.2	-0.14	-0.1	-0.37	0.62	-1.06	-0.09	-0.92	-1.31	-1.73	-1.49	-1.13	-1	-1.73	0.12	-0.74	0.29	-0.74
GENE415X	6307	 SC4MOL -  Sterol-C4-methyl oxidase-like	1	-0.2	0.06	0.23	0.05	-0.14	0.83	0.9	-0.03	-0.43	0.21	0.01	-0.98	0.02	0.91	-0.07	-0.68	-1.09	-1.74	0.33	-0.15	0.05	-0.23	-0.37	-0.65	0.23	0.43	0.16	-0.34	-2.03	-1.06	-2.04	0.29	0.16	-0.16	-1.2
GENE1080X	6713	 SQLE -  Squalene epoxidase	1	-0.11	0.31	-0.33	0.23	-0.09	0.07	0.99	0.14	-0.29	-0.24	-0.41	-0.64	-0.5	-0.08	-0.68	-0.5	-1.09	-2.03	0.09	0.38	0.12	-0.6	-0.57	-0.86	-0.59	-0.75	0.28	-0.67	-0.87	-1.77	-2.29	-0.56	-0.48	-0.26	-1
GENE25X	338321	 NLRP9 -  Transcribed locus	1	0.6	-0.5			-0.1	0.75	-0.33	0.05	-0.29	0.15	-0.37	0.31	-0.12	-0.78	-0.24	-0.04	-0.32	-1.77	0.49	-0.72	0.37	-0.15		-0.59	0.09	-1.56	-1.34	-0.62		-1.16	-1.6	-1.02	-1.92	-0.77	-1
GENE1552X	9943	 OXSR1 -  Oxidative-stress responsive 1	1	0.37	0.08	-0.38	-0.04	-0.05	0.6	0.39	-0.26	-0.06	-0.43	-0.02	0.61	-0.37	-0.4	-0.25	0.12	0.05	-1.82	0.32	-1.03	0.59	0.12	0.34	0.1	-0.04	-0.17	-0.49	-1.19	-1.64	-0.04	-0.34	0.43	-1.05	0.4	-1.07
GENE474X	1192	 CLIC1 -  Chloride intracellular channel 1	1	-0.2	-0.12	-0.55	0.71	0.17	1.11	0.98	-0.17	0.01	0.29	0.28	0.27	-0.07	0.41	0.14	-0.23	0.3	-1.26	0.4	-0.63	-0.27	0.5	0.42	-0.45	-0.18	-0.31	-0.15	-0.53	-1.81	0.06	-0.62	-1.67	-0.4	-0.52	-0.91
GENE1166X	649	 BMP1 -  Bone morphogenetic protein 1	1	-0.03	0.09	-0.35	0.36	-0.07	1.94	1.61	-0.03	-0.05	0.43	-0.03	-0.1	-0.22	-0.21	-0.11	-0.27	0.24	-0.3	0.25	-1.01	0.28	0.47	-0.41	-0.8	1.2	-0.1	-0.56	-0.47	-1.27	0	-0.51	-0.14	0.06	0.08	-0.14
GENE363X	9512	 PMPCB -  Peptidase (mitochondrial processing) beta	1	0.02	0.22	-0.5	0.35	-0.1	1	0.75	0.21	0.02	0.13	0.21	0.87	-0.14	-0.82	-0.53	0.8	0.09	-1.69	1.02	-1.07	0.61	-0.55	0.43	0.46	0.67	-0.77	-0.41	0.63	-1.76	-1.23	-1.2	-0.19	1.54	0.63	-1.08
GENE506X	7978	 MTERF -  Mitochondrial transcription termination factor	1	0.09	0.13	-0.48	0.2	0.06	0.05	0.25	-0.36	0.03	-1.34	-0.28	-0.7	0.42	-0.28	-0.78	0.36	0.31	-0.92	1.13	-1.29	0.55	-0.38	-1.02	-0.19	-0.41	-1.44	-1.33	-0.82	-2.6	-1.28	-0.92	-0.36	1.41	-0.24	-2.29
GENE608X	2021	 ENDOG -  Endonuclease G	1	0	0.22	-0.24	0.27	-0.26	-0.42	-0.54	-0.89	-0.77	-0.86	-1.07	-0.55	0.27	-0.58	-1.31			-1.2	0.79	-1.09	0.67	-0.38	-1.39	-0.76	-0.63	-1.22	-1.48	-0.71	-2.91	-1.77	-1.87	-0.66	1.35	-0.42	-1.61
GENE44X	150291	 C22orf27 -  Chromosome 22 open reading frame 27	1	-0.38	0.03	-0.01	0.17	0.19	-0.79	-0.57	-0.36	-0.4	-0.89	-0.93	-1.46	-0.17	-0.34	-0.43	-0.75	-0.47	-1.64	-0.11	0.61		-0.51	-0.31		-0.43	-0.8	-0.8	-1.68		-1.53	-1.3	0.25	-0.51	-1.09	-0.66
GENE748X	386759	 LOC100288114 -  Hypothetical protein LOC100288114	1	-0.94	-0.15	0.24	0	0.84	-0.01	-0.22	0.11	-0.08	-0.65	-0.11	-1.21	0.18	0.37	-0.05	-0.89	-0.76	-1.66	-0.25	0.21	-0.23	0.26	-0.02	0.5	0.1	-0.84	-0.78	-2.11	-1.2	-1.53	-0.98	0.65	-0.08	-0.44	
GENE878X	83443	" SF3B5 -  Splicing factor 3b, subunit 5, 10kDa"	1	-0.98	-0.23	0.3	0.42	0.47	0.64	0.1	0.21	0.04	-0.16	-0.58	-1.64	-0.08	-0.29	-1.05	-1.14	-0.63	-2.28	0.06	0.63	-0.55	-0.13	-0.77	-0.17	-0.84	-1.45	-0.12	-2.04	-1.93	-0.93	-0.85	0.07	-0.21	-0.81	-1.31
GENE1479X	55505	 NOP10 -  NOP10 ribonucleoprotein homolog (yeast)	1	-0.18	-0.88	0.04	0.29	0.71	0.2	0.21	-0.03	-0.16	-0.08	-0.97	-1.17	-0.02	-0.46	-0.55	0.16	-0.36	-3	0.19	0.53	-0.57	-0.15	0.11	-0.2	-0.67	-0.58	-0.7	-1.67	-2.03	-1	-0.71	-1.15	-0.35	-0.75	-1.34
GENE520X	3212	 HOXB2 -  Homeobox B2	1	-0.61	0.1	0.34	-0.32	0.49	-0.14	0.68	0	0	0.24	0.31	-0.8	0.39	-0.11	-0.97	-0.53	-0.48	-1.01	0.32	0.65	-0.26	-0.72	0.4	1.33	-0.26	0.39	-0.2	-2.14	-2.43	-0.69	-0.18	-0.5	0.01	-0.77	-2.16
GENE1845X	6263	 RYR3 -  ryanodine receptor 3	1	-0.2	0.15	-0.46	-0.04	0.54	-0.43	-0.58	0.14	0.28	0.3	-0.3	-0.44	-0.14	-0.11	-0.38	-0.02	0.23	-0.7	0.08	0.18	-0.18	-0.09	-0.15	0.02	-0.46	-0.28	-0.18	-1.88	-2.22	-0.54	-0.48	0.13	-0.28	-0.69	-0.34
GENE592X	119391	 GSTO2 -  Glutathione S-transferase omega 2	1	-0.33	-0.52	0.27	0.71	-0.14	0.5	0.09	0.64	0.21	0.2	-0.14	-1.83	-0.07	0.3	-0.61	-0.6	-0.37	-0.94	-0.06	0.59	-0.41	-0.13	-0.53	-0.6	-0.56	-1.03	0.05	-1.22	-2.35	-0.15	-0.55	-0.99	-0.94	-0.8	-0.8
GENE366X	1349	 COX7B -  Cytochrome c oxidase subunit VIIb	1	-0.2	-0.49	0.29	0.26	0.12	-0.08	0.12	-0.2	-0.01	0.58	0.09	-1.17	0.12	-0.22	-0.21	-0.42	0	-2.33	-0.06	0.57	0.06	-0.57	-0.51	0.26	-0.06	-0.05	0.05	-1.52	-3	-0.69	0.61	0.47	0.05	0.41	0
GENE18X	8349	" HIST2H2BE -  Histone cluster 2, H2be"	1	-0.2	-0.52	0.76		-0.03	0.24	0.33	0.86	0.78	0.98	0.88	-0.65	-0.14	0.32	0.63	0.35	-0.05	-1.81	0.09		0.34	-0.44		0.76	0.41	0.28	0.75	-1.55	-0.81	0.77	1.9	0.73	0.22	0.94	0.02
GENE213X	4103	" MAGEA4 -  Melanoma antigen family A, 4"	1	-1.14	-0.08	1.2	-0.75	0.76	0.84	1.45	-0.63	1.26	1.1	1.9	0.17	0.78	1.33	-0.95	-0.58	0.86	-1.02	-0.34	1.91	-0.47	-1.09	0.38	-0.89	-1.2	-0.19	0.62	-1.45	-1.41	0.22	0.61	-0.44	-0.7	0.2	2
GENE607X	4162	 MCAM -  Melanoma cell adhesion molecule	1	-0.65	0.09	0.98	-0.35	-0.06	0.15	0.62	-0.69	1.39	-0.32	0.34	-0.89	0.23	0.26	-0.92	-0.85	-0.09	-0.5	0.02	0.98	-0.44	-0.55	-0.51	-1	-0.55	-0.43	-0.55	-1.83	-2.4	-1.01	0.28	-0.21	-0.95	-0.76	0
GENE361X	1287	" COL4A5 -  Collagen, type IV, alpha 5"	1	-1.11	-0.06	1.01	-0.4	0.58	0.8	0.67	-0.13	0.56	0.56	1.12	-0.37	0.32	0.72	-0.55	-0.94	-0.2	-0.39	-0.11	0.51	-0.41	0.02	-0.76	-1.72	-0.34	0.09	0.01	-0.48	-1.85	-0.19	0.61	-0.04	-0.41	-0.31	-0.18
GENE504X	9289	 GPR56 -  G protein-coupled receptor 56	1	-0.45	-0.21	1.16	-0.49	-0.01	0.96	1.59	-0.81	0.41	0.64	1.58	0.51	0.24	0.38	-0.85	-0.27	0.65	-1.15	0.17	0.59	0	-0.75	-0.41	-1.24	-0.5	-0.28	0.46	-1.36	-1.79	-0.84	0.19	-0.23	-0.21	-0.18	-0.11
GENE497X	54874	 FNBP1L -  Transcribed locus	1	-0.77	-0.29	1.49	-0.54	0.12	0.66	1.64	-0.26	0.59	0.87	1.77	0.24	0.32	1.13	-0.11	-0.24	0.58	0.18	-0.19	0.44	0.22	-0.47	-0.57	-0.5	-0.43	0.14	0.19	-1.47	-0.69	-1.6	-0.8	0.05	-0.54	0.16	-0.25
GENE511X	55366	 LGR4 -  Leucine-rich repeat-containing G protein-coupled receptor 4	1	-0.74	-0.05	1.52	-1.06	0.31	0.06	0.41	-0.35	1.09	0.76	1.76	0.18	0.66	0.97	-0.8	-0.85	0.63	-1.12	0.16	0.42	-0.05	-0.54	-1.12	-1.06	-0.49	0.01	-0.4	-2.51	-1.18	-1.5	-0.45	0.2	0.06	0.32	-0.3
GENE860X	79850	" FAM57A -  Family with sequence similarity 57, member A"	1	-0.34	-0.25	1.17	-0.65	0.07	0.04	0.54	-0.65	0.36	0.4	1.6	0.16	0.22	0.72	-1.04	-0.59	0.47	-0.27		0.58	0.02	-0.6	-0.6	-0.77	-0.15	0.24	0.51	-2.04	-2.33	-2.11	-1.32	0.13	0.22	0.77	0.03
GENE1028X	118987	 PDZD8 -  PDZ domain containing 8	1	-0.36	-0.18	0.2	-0.04	0.37	0.44	0.72	-0.08	0.45	0.51	0.78	0.17	0.24	0.55	0.44	-0.15	0.39	-0.31	-1.24	0.67	0.26	0.3	0.7	-0.21	0.88	0.52	0.3	-1.61	-1.75	-0.72	-0.53	0.55	0.61	0.68	-0.04
GENE217X	5865	" RAB3B -  RAB3B, member RAS oncogene family"	1	-0.5	0.36	0.49	-0.83	0.49	0.43	0.59	0.9	1.57	1.34	1.73	0.95	0.56	1.64	0.76	-0.52	0.37	-1.46	-1.21	0.57	0.55	0.1	0.67	-0.22	0.18	0.46	0.8	-0.65	-2.36	-0.37	-0.97	0.03	0.3	0.32	-0.81
GENE341X	65998	 C11orf95 -  chromosome 11 open reading frame 95	1	-0.52	-0.04	0.52	-0.31	0.33	-0.09	0.3	0.18	-0.14	0.21	0.95	-0.51	0.23	2.14	-0.65	-0.41	0.01	-0.5	-0.92	0.71	0	0.19	0.31	0.22	-0.38	-0.09	0.04	-1.68	-1.47	-1.83	-1.36	-1.14	-0.63	0.19	0.09
GENE888X	9884	 LRRC37A  -  leucine rich repeat containing 37A	1	-0.82	0.28	-0.2	-0.05	0.79	0.15	-0.2	0.26	-0.01	-0.81	-0.22	-0.58	1.01	0.63	0.27	-0.53	-0.39	-0.77	0.45	-0.46	-0.26	0.28	-0.56	-0.38	-0.15	-1.38	-0.49	-2.15	-1.77	-1.16	-0.68	-1.08	-1.14	-0.82	-0.47
GENE897X	79083	 MLPH -  Melanophilin	1	-0.35	-0.17		0.29	0.22	2.01	2.96	-0.11	-0.42	-0.4	-0.27	0.17	0.68	1.21	0.04	-0.71	-0.12	1.36	-0.02	-0.07	-0.14	0.24	-0.55	-0.79	-0.11	0.27	0.01	-1.01	-1.62	-1.39	-2.28	0	-0.39	-0.6	-0.73
GENE1333X	10838	 ZNF275 -  Zinc finger protein 275	1	0.13	-0.63	0.23	0.01	0.25	1.05	0.78	0.33	0.56	0.53	0.59	0.94	0.23	-0.07	-0.37	0.81	0.16	-0.64	-0.01	0.22	-0.58	0.38	0.21	-0.19	-0.92	-0.38	0.49	-1.34	-0.74	-2.03	-1.65	-0.86	-0.01	-0.48	-0.85
GENE1398X	55198	" APPL2 -  Adaptor protein, phosphotyrosine interaction, PH domain and leucine zipper containing 2"	1	-0.42	-0.28	0.48	-0.09	0.29	0.54	0.62	0.1	0.02	0.39	0.34	0.74	0.25	0.62	0.19	0.02	0.2	0.43	0.37	-0.18	-0.33	0.14	-0.06	-0.42	-0.32	-0.39	-0.42	-0.5	-1.63	-1.58	-1.93	-0.27	0.13	-0.48	-1.66
GENE1497X	3422	 IDI1 -  Isopentenyl-diphosphate delta isomerase 1	1	-0.28	0.13	0.09	0.19	0.03	1.42	1.14	0.14	0.03	0.79	1.97	1.13	0.17	0.4	0.08	-0.29	-0.31	-0.41	0.1	0.3	-0.05	-0.21	-0.98	-0.7	-0.02	0.25	0.86	-0.65	-1.28	-1.6	-1.82	0.24	0.09	-0.2	-0.78
GENE1270X	10400	 PEMT -  Phosphatidylethanolamine N-methyltransferase	1	-0.05	0.08	-0.24	0.13	0.1	2.07	0.73	0.26	-0.03	0.38	0.78	0.44	-0.05	-0.02	0.11	0.2	0.61	0.17	0.09	0.17	-0.17	-0.08	-0.65	0.23	0.21	-0.07	0.31	-0.38	-0.34	-1.57	-2.25	-0.12	0.32	-0.1	-0.85
GENE1110X	9467	 SH3BP5 -  SH3-domain binding protein 5 (BTK-associated)	1	-0.36	0.01	0.05	0.21	0.08	1.04	0.77	0.35	-0.02	0.25	0.43	0.82	-0.29	-0.4	0.25	-0.09	0.37	0.07	0.09	-0.2	0.1	0.01	-0.77	0.31	0.09	0.09	-0.08	0.08	-0.65	-1.94	-2.42	0.05	0.03	-0.05	0
GENE1392X	3615	 IMPDH2 -  IMP (inosine 5'-monophosphate) dehydrogenase 2	1	-0.34	0.04	-0.03	0.19	0.13	0.28	0.06	-0.09	-0.31	-0.36	0.09	0.58	0.15	0.14	-0.47	-0.32	-0.47	0.29	-0.05	-0.34	0.31	0.07	-0.6	-0.65	0.02	-0.42	-0.28	-0.56	-1.29	-1.78	-2.42	-0.17	-0.13	-0.32	-0.02
GENE1669X	54658	" UGT1A -  UDP glucuronosyltransferase 1 family, polypeptide A complex locus"	1	-0.19		0.05	0.25	-0.1	0.28	0.05	0.28	-0.25	-0.26	0.1	0.56	-0.1	0.05	0.01	-0.19	-0.34	0.41	-0.09	0.09	-0.17	0.17	-1.06	-1.23	0.17	-0.29	-0.43	-0.77	-1.08	-2.62	-2.5	-0.61	-0.46	-0.76	-0.76
GENE1261X	7867	 MAPKAPK3 -  Mitogen-activated protein kinase-activated protein kinase 3	1	0.13	-0.09	-0.26	0.22	0	0.64	0.85	-0.31	-0.39	-0.35	0.27	0.28	0.13	-0.05	-0.41	-0.3	0.02	-0.57	-0.27	0.22	0.07	-0.02	-0.82	-0.66	-0.14	-0.44	-0.58	-0.75	-1.94	-1.11	-2.21	-0.2	-0.74	-0.36	-0.83
GENE442X	27183	 VPS4A -  Vacuolar protein sorting 4 homolog A (S. cerevisiae)	1	0.27	0.05	-0.45	0.02	0.13	0.89	0.84	-0.07	0.04	0.08	0.35	1.07	0.31	-0.17	-0.06	-0.14	-0.08	-0.98	-0.06	-0.62	-0.05	0.75	0.01	-0.58	0.04	-0.61	-0.89	-1.06	-2.25	-1.22	-1.92	-0.32	-1.06	-0.16	-0.25
GENE715X	2317	" FLNB -  Filamin B, beta"	1	-0.11	0.32	-0.41	0.21	-0.02	1.28	0.64	-0.03	-0.15	-0.31	0.78	0.11	0.26	0.31	-0.3	-0.17	-0.12	-0.96	-0.3	-0.74	0.56	0.49	-0.34	0.2	0.21	0.08	-0.32	-1.17	-2.05	-1.01	-1.68	0.17	-0.13	0.25	-0.66
GENE586X	54815	 GATAD2A -  GATA zinc finger domain containing 2A	1	-0.27	-0.26	0.17	0.31	0.04	1.09	0.54	0.01	-0.42	0.12	0.74	0.09	0.28	0.24	-0.13	0.16	0.45	-0.4	0.03	-0.18	0.18	-0.03	0.49	0.03	-0.28	-0.09	-0.05	-0.41	-1.6	-1.14	-1.74	-0.03	-0.02	-0.07	-0.74
GENE867X	54815	 GATAD2A  -  GATA zinc finger domain containing 2A	1	-0.27	-0.26	0.17	0.31	0.04	1.09	0.54	0.01	-0.42	0.12	0.74	0.09	0.28	0.24	-0.13	0.16	0.45	-0.4	0.03	-0.18	0.18	-0.03	0.49	0.03	-0.28	-0.09	-0.05	-0.41	-1.6	-1.14	-1.74	-0.03	-0.02	-0.07	-0.74
GENE312X	11138	" TBC1D8 -  TBC1 domain family, member 8 (with GRAM domain)"	1	0.2	0.49	-0.67	-0.03	-0.01	1.38	0.31	0.26	0.48	0.49	0.42	1.63	0.71	0.61	-0.07	0.39	0.35		-0.32	-0.61	0.86	0.07	-0.09	0.41	0.75	0.06	0.72	-1.35	-1.7	-2.45	-1.98	0.57	0.17	0.36	-0.66
GENE906X	677824	" SNORA43 -  Small nucleolar RNA, H/ACA box 43"	1	0.12	0.18	-0.18	-0.04	-0.1	1.67	1.1	-0.47	0.19	0.78	1.92	1.38	0.65	-0.63	-0.4	-0.1	0.43	-0.43	-0.17	-0.8	0.58	0.4	1.06	0.7	-0.41	-0.98	-0.07	-1.03	-0.42	-2.64	-3.06	-0.06	-0.32	0.05	-0.51
GENE1667X	5636	 PRPSAP2 -  Phosphoribosyl pyrophosphate synthetase-associated protein 2	1	-0.15	-0.06	-0.2	0.08	0.34	0.39	1.02	-0.01	-0.09	-0.17	0.95	1.32	0.44	0.41	0.3	-0.4	0.44	-0.2	0.01	0.54	0.01	-0.56	-0.03	0.91	-0.22	-0.46	-1.13	-1.26	-1.16	-1.97	-1.67		-0.59	-0.51	-0.67
GENE863X	9352	 TXNL1 -  Thioredoxin-like 1	1	-0.01	0.45	-0.59	0.13	0.03	0.97	1.35	-0.12	-0.34	-0.38	0.24	1.8	0.32	-0.13	-0.1	-0.21	-0.24	-0.29	-0.14	0.54	0.04	-0.43	-0.16	0.52	-0.88	-1.23	-0.72	-1.24	-1.21	-1.75	-1.43	-0.45	-1	-0.33	-0.65
GENE609X	1727	 CYB5R3 -  cytochrome b5 reductase 3	1	-0.09	0.05	-0.24	0.49	-0.21	0.95	0.57	0.31	-0.27	-0.52	0.46	0.52	0.53	0.24	-0.03	0.05	-0.04	-0.65	-0.12	-1.34	0.6	0.87	0.37	0.55	-0.27	-0.92	-1.42	-0.42	-1.77	-2.02	-1.45	-0.41	-1.88	-0.67	-1.28
GENE434X	22993	 HMGXB3 -  HMG box domain containing 3	1	0.21	0.17	-0.8	0.4	0	1.08	0.96	0.01	-0.18	-0.46	-0.66	0.03	0.03	-0.16	-0.23	0.11	-0.27	-0.99	0.25	-1.63	0.8	0.59	-0.33	0.66	0.26	-0.11	-1	0.14	-1.72	-1.71	-1.22	0.14	-0.65	0.19	-0.9
GENE328X	5372	 PMM1 -  Phosphomannomutase 1	1	0.27	0.03	-0.46	0.09	0.05	0.35	0.92	0.21	0.02	-0.17	-0.1	0.69	0.35	0.34	-0.24	0.13	-0.11	-0.42	-0.38	-1.26	1.02	0.62	0.2	0.86	0.36	-0.49	-1.02	0.5	-1.68	-1.27	-1.74	0.24	0.08	0.04	0.29
GENE20X	6128	 RPL6 -  Ribosomal protein L6	1	-0.2	-0.04	0.11	0.16	-0.03	0.33	-0.04	-0.06	-0.13	0.11	0.01	-0.27	-0.33	-0.13	0.04	-0.03	0.11	-0.36	0.76	-1.31	0.43	0.12	-0.28		-0.5	-0.68	-1	-0.25	-1.79	-0.88	-2.08	-0.01	-0.34	0.19	-0.43
GENE21X	6128	 RPL6 -  ribosomal protein L6	1	-0.2	-0.04	0.11	0.16	-0.03	0.33	-0.04	-0.06	-0.13	0.11	0.01	-0.27	-0.33	-0.13	0.04	-0.03	0.11	-0.36	0.76	-1.31	0.43	0.12	-0.28		-0.5	-0.68	-1	-0.25	-1.79	-0.88	-2.08	-0.01	-0.34	0.19	-0.43
GENE766X	2331	 FMOD -  Fibromodulin	1	0.54	-0.16	0.6	-0.97	0	-0.01	-0.04	-0.52	0.16	0.1	0.18	-0.05	-0.64	-0.16	-0.1	-0.42	-0.86	0.67	0.6	-0.77	-0.07	0.23	-0.26	-1.08	0.6	-0.43	-1.09	-1.62	-2.1	-1.07	-1.25	-0.87	-0.74	-1.09	-1.2
GENE281X	387758	 FIBIN -  fin bud initiation factor homolog (zebrafish)	1	-0.43	0.31	0.02	-0.23	0.32	0.69	1.25	0.47	0.41	0.71	0.93	0.66	-0.11	1.23	0.63	-0.47	-0.65	-0.16	-0.6	-0.72	0.61	0.72	-0.25	0.8	0.59	0.13	0.31	-1.43	-3.36	-0.41	-0.95	-1.35	-0.14	0.83	-1.65
GENE737X	347	 APOD -  Apolipoprotein D	1		-0.27	0.46	-0.16	-0.04	0.52	0.8	0.68	0.05	0.2	0.37	0.31	-0.9	0.31	-0.04	-0.32	-1.59	-0.18	0.07	-0.81	0.24	0.51	-0.8	-0.77	0.13	-0.5	-0.64	-1.38	-2.64	-0.94	-0.56	-1.62	-0.85	-0.51	-0.61
GENE337X	10873	" ME3 -  Malic enzyme 3, NADP(+)-dependent, mitochondrial"	1		-0.16	-0.16	0.09	0.22	1.65	0.24	-0.12	0.08	-0.57	0.72	0.53	0.2	0.51	0.12	0.17	0.3	0.12	0.44	-0.03	-0.14	-0.28	-1.27	-1.39	0.19	-0.06	-0.25	-0.34	-1.9	0.14	-0.74	-0.54	-0.55	-0.12	-0.43
GENE1265X	84945	 ABHD13 -  Abhydrolase domain containing 13	1	0.25	-0.23	-0.85	0.23	0.18	0.45	0.45	-0.18	0.07	0.19	-0.34	-0.82	0.73	0.68	0.25	0.22	0.71	-0.36	0.64	0	-0.26	-0.38	0.05	-0.6	-0.43	-0.62	-0.77	-0.98	-1.74	-1	-1.02	-0.53	-0.56	-0.91	-1.7
GENE1542X	22954	 TRIM32 -  Tripartite motif-containing 32	1	-0.02	-0.01	-0.01	-0.01	0.06	-0.12	0.22	0.19	-0.73	-0.28	-0.44	-1.26	0.79	0.96	0.28	-0.71	-0.1	-0.37	-0.01	0	0.06	-0.04	-0.67	-0.41	-0.37	-0.76	-0.69	-1.42	-2.07	-0.52	-0.27	-0.77	-0.49	-0.87	-2.46
GENE290X	158586	" ZXDB -  Zinc finger, X-linked, duplicated B"	1	-0.34	-0.16	-0.17	0.35	0.31	1.61	0.81	0.46	0.04	0.29	1.43	-0.29	1.13	0.9	0.17	0.02	0.31	0.22	-1.06	1.02	-0.24	0.28	0.23	-0.87	-0.32		0.04	-0.76	-2.19	-0.41	-0.45	-0.22	-0.06	0.02	
GENE941X	2192	 FBLN1 -  Fibulin 1	1	-0.44	-0.37	0.36	0.13	0.34	0.14	0.13	0.06	0.1	0.09	0.63	-0.2	0.88	-0.55	-1.18	-1.34	-0.96	-0.71	-0.96	0.47	-0.18	0.67	-0.73	-1.62	-0.5	-1.18	0.1	-1.91	-2.73	-0.66	-0.55	-1.02	-0.75	-0.57	-0.37
GENE872X	79613	 TMCO7 -  transmembrane and coiled-coil domains 7	1	-0.45	-0.16	0.19	0.54	-0.13	-0.65	-0.28	-0.74	-0.62	-1.14	-0.93	-0.76	-0.15	0.29	-0.14	-0.49	-0.8	0.11	0.15	-0.38	0.22	0	-1.37	-1.71	0.13	-0.2	-0.27	-1.32	-2.83	-1.42	-0.88	-1.17	-0.47	-0.36	-0.77
GENE928X	26017	" FAM32A -  Family with sequence similarity 32, member A"	1	-0.8	-0.31	0.2	0.37	0.53	0.79	-0.17	0.24	-1.09	-0.95	-0.54	-1.18	0.37	-0.09	-1.26	-1.42	-0.47	-0.32	0.05	0.03	-0.59	0.51	-1.01	-1.66	0.23	-0.53	-1.3	-1.75	-2	-1.42	-1.5	-0.68	-1.06		-1.04
GENE884X	7071	 KLF10 -  Kruppel-like factor 10	1	-0.06	0.01	-0.21	0.07	0.19	1.02	0.19	-0.08	0.57	1.22	0.15	0.84	-0.2	-0.26	0.06	0.47	-0.04	-0.18	0.24	-0.22	0.23	-0.25	-2	-1.62	0.44	0.31	-0.43	-1.27	-1.52	-0.68	-2.2	-0.54	1.19	-0.53	-1.17
GENE710X	23371	 TENC1 -  Tensin like C1 domain containing phosphatase (tensin 2)	1	0.77	0.14	-0.52	-0.21	-0.16	0	0.32	-0.19	0.21	-0.6	-0.12	0.71	0.04	0.22	-0.31	-0.07	-0.76	0.32	0.55	0.09	0.28	-0.9	-1.54	-1.59	0	0.46	-0.92	-1.56	-0.81	-1.16	-2.44	-0.09	-0.44	-1.16	-1.62
GENE261X	196047	 EMX2OS -  EMX2 opposite strand (non-protein coding)	1	0.47	0.51		-0.55	-0.43	-0.3	-0.32	-0.61	-0.63	-0.52	0.36	-0.36	-0.54	0.31	-0.91	-0.16	-0.99	-0.58	0.37	-0.21	-0.13	-0.04	-2.34	-1	0.53	-0.13	-1.54	-2.24	-0.94	-0.96	-1.95	-0.32	-0.03	-0.56	-1.84
GENE285X	171024	 SYNPO2 -  synaptopodin 2	1	0.5	-0.17	0.06	-0.3	-0.09	-0.36	0.55	0	0.23	-0.1	0.11	0.4	-0.47	0.26	-0.07	-0.18	-0.62	-0.63	0.29	-0.52	0.13	0.2	-1.5	-1.92	0.54	-0.03	-0.68	-1.33	-0.34	0.08	-0.9	0.56	0.56	0.09	-1.63
GENE1474X	89796	 NAV1 -  neuron navigator 1	1	-0.08	0.15	-0.11	-0.17	0.21	-0.37	0.41	-0.06	0.09	-0.06	-0.25	-0.45	-0.29	0	-0.62	-0.05	-0.38	-1.11	-0.12	0.27	0.24	-0.39	-1.67	-1.63	0.13	0.23	-0.26	-1.44	-0.91	-0.53	-1.38	-0.26	-0.19	0.18	-0.66
GENE494X	10403	" NDC80 -  NDC80 homolog, kinetochore complex component (S. cerevisiae)"	1	0.14	-0.4	0.04	-0.84	1.08	0.43	0.56	-0.43	0.37	-0.12	0.3	-0.69	-0.55	-0.37	-0.78	-0.31	-0.04	-0.41	0.5	0.12	0.03	-0.65	-2.08	-2.46	-0.09	-0.65	-1.43	-0.96	-2.31	0.05	-1.02	0.06	-0.7	-0.87	-1.89
GENE498X	8407	 TAGLN2 -  Transgelin 2	1	-0.22	0.33	-0.96	0.52	0.33	0.92	0.77	0.66	0.44	0.83	0.35	-0.16	0.55	0.28	0.04	0.19	0.72	-0.06	-1.1	-0.13	0.22	1	-0.94	-2.56	-0.02	-0.15	-0.46	-1.22	-2.94	0.32	-0.17	0.25	-0.03	-0.58	-0.73
GENE548X	8463	 TEAD2 -  TEA domain family member 2	1	0.44	0.09	0.45	-0.5	-0.48	-0.14	-0.93	-0.37	-0.19	0.1	0.79	-0.85	-0.41	0.14	-0.63	-1.28	-0.4	-0.31	-0.74	-0.14	0.38	0.51	-2.1	-1.15	-0.32	-0.84	-1.11	-2.54	-2.59	-0.23	-0.52	-0.67	-0.46	-0.78	-1.35
GENE952X	10902	 BRD8 -  Bromodomain containing 8	1	-0.62	-0.23	0.29	0.36	0.19	-0.34	0.14	0.14	-0.12	-0.26	-0.05	-0.14	0.06	0.32	-0.29	-0.28	-0.16	0.37	-0.17	0.25	-0.31	0.23	-1.33	-0.18	-0.52	-0.82	-0.93	-1.49	-1.92	-1.76	-0.64	0.16	-0.19	-0.85	-0.83
GENE578X	10982	" MAPRE2 -  Microtubule-associated protein, RP/EB family, member 2"	1	-0.48	-0.53	0.24	0.51	0.27	-0.09	0.12	0.09	-0.04	0.04	1.16	0.07	0.66	0.92	-0.17	-0.47	0.04	-0.03	0.11	-0.54	0.25	0.17	-1.11	-0.01	0.06	-0.63	-0.37	-1.02	-1.84	-1.03	-1.78	-0.65	-0.38	-0.58	-0.88
GENE346X	7485	 WRB -  tryptophan rich basic protein	1	0.02	-0.13	-0.05	0.12	0.04	0.08	1.23	0.05	-0.29	-0.31	0.11	1.42	0.6	0.6	-0.11	0.04	-0.12	1.25	0.43	-1.28	0.6	0.25	-0.75	0.1	0.07	-0.68	-1.21	-0.3	-1.86	-1.96	-2.31	0.42	-0.37	-0.09	-1.08
GENE27X	28512	 NKIRAS1 -  NFKB inhibitor interacting Ras-like 1	1	0.08	0.22	-0.48	0.32	-0.13	-0.13	0.65	0.09	-0.03	-0.08	-0.39	0.6	0.12	0.14	0.4	0.19	0.18	0.22	1.36	-1.29	0.53	-0.6		-0.18	-0.02	-0.74	-1.97	-0.9		-1.46	-1.91	-0.43	-0.28	-0.74	-1.27
GENE644X	2852	 GPER -  G protein-coupled estrogen receptor 1	1	0.25	0	-0.24	0.01	-0.01	0.19	0.9	0.49	-0.05	0.38	-0.11	0.42	-0.11	0.11	0.07	0.58	-0.08	-0.28	0.63	-1.2	0.4	0.16	-0.7	-0.26	-0.25	-0.78	-1.33	-0.64	-1.95	-0.93	-1.4	0.09	-0.11	-0.39	-1.73
GENE898X	83879	 CDCA7 -  Cell division cycle associated 7	1	0.72	-0.13	0.01	-0.17	-0.44	0.21	0.99	0.48	-0.22	-0.23	-0.04	0.18	-0.15	-0.19	-0.06	-0.15	0.04	-0.15	0.38	-1.33	0.69	0.25	-2.2	-0.87	-0.15	-0.33	-0.9	-0.73	-2.07	-0.87	-1.2	0.47	0.3	-0.24	-1.45
GENE1446X	29899	" GPSM2 -  G-protein signaling modulator 2 (AGS3-like, C. elegans)"	1	0.17	-0.2	0.35	0.03	-0.33	0.38	1.18	0.66	-0.62	-0.25	0.61	0.94	0.04	0.07	0.04	0.16	-0.48	0.93	0.69	-1.06	0.33	0.04	-1.76	-1.72	0.79	-0.83	-1.63	-1.64	-1.66	-1.76	-1.96	0.06	-0.21	-1.2	-2.67
GENE28X	9915	 ARNT2 -  Aryl-hydrocarbon receptor nuclear translocator 2	1	0.06	-0.05	-0.03		0.03	0.53	0.48	0.05	-0.67	-0.44	-0.19	-0.05	-0.05	0.07	-0.44	-0.11	-0.47	-0.17	-0.22		0.22			-0.75	-0.49	-0.64	-1.23	-1.52	-1.85	-1.4	-1.62	-0.22	-0.43	-1.32	-2.12
GENE29X	7248	 TSC1 -  Tuberous sclerosis 1	1	-0.07	-0.15	0.22		0	0.77	0.55	-0.02	-0.82	-0.68	-0.1	-0.04	-0.08	0.23	-0.41	-0.19	-0.53	-0.37	-0.38		0.35	0.02		-0.19	-0.25	-0.83	-1.19	-1.07	-1.88	-1.23	-1.58	-0.16	-0.64	-1.58	-2.39
GENE409X	79633	 FAT4  -  FAT tumor suppressor homolog 4 (Drosophila)	1	0.13	-0.41	0.19	-0.39	0.49	1.26	0.08	0.08	-0.5	-0.56	-1.05	0.34	-0.53	-0.36	-0.11	-0.14	-0.44	0.21	0.26	-0.93	0.57	0.1	-1.77	-1.93	-0.21	-0.5	-1	-1.34	-1.67	-0.97	-0.64	-0.07	-0.2	-0.92	-1.57
GENE719X	79140	 CCDC28B -  coiled-coil domain containing 28B	1	0.3	-0.29	0.37	-0.18	-0.21	0.18	-0.45	0.46	-0.4	-0.04	-0.17	0.22	-0.61	-0.48	-0.15	-0.03	-0.57	-0.31	0.88	-1.17	0.08	0.21	-1.09	-1.8	0.08	-0.36	-0.76	-1.24	-1.63	-0.67	-1.23	0.16	0.05	-0.73	-0.81
GENE655X	6721	 SREBF2 -  Sterol regulatory element binding transcription factor 2	1	-0.03	0.01	0.29	0.12	-0.37	0.43	-0.05	0.82	-0.09	0.05	-0.51	-0.65	-0.19	0.13	0.43	0.25	-0.42	-0.31	0.31	-1.03	0.44	0.28	-0.09	-1.36	-0.2	-0.64	-1.52	-0.76	-1.85	-0.46	-0.29	0.47	0.19	-1.12	-1.98
GENE525X	28981	 IFT81 -  Intraflagellar transport 81 homolog (Chlamydomonas)	1	0.17	-0.37	0.73	-0.31	-0.2	-0.24	0.62	0.99	-0.47	0	0.18	-0.86	-0.31	0.58	0.16	-0.42	-0.05	0.29	0.38	-1.35	0.58	0.38	-1.16	-1.13	-0.27	-0.4	-0.87	-0.85	-1.85	-0.6	-0.19	0.36	0.15	-0.75	-1.79
GENE713X	9079	 LDB2 -  LIM domain binding 2	1	-0.45	-0.06	1.09	-0.47	-0.13	0.67	0.6	0.02	0.25	0.47	1.01	-0.12	0.37	0.96	-0.29	-0.37	0.17	-0.53	-0.49	-0.45	0.3	0.63	-1.34	-1.82	0.47	0.32	-0.43	-2.48	-1.02	-0.27	-0.57	-0.5	0.02	-0.1	-0.54
GENE1188X	9270	 ITGB1BP1 -  Integrin beta 1 binding protein 1	1	-0.05	-0.38	0.1	0.22	0.12	1.34	1.93	-0.16	-0.23	-0.05	0.38	0.75	0.5	0.56	-0.06	-0.04	0.24	-0.67	0.29	0.41	-0.01	-0.69	-0.84	-0.38	-0.32	-0.5	-0.61	-0.79	-1.81	-0.24	-0.45	0.14	-0.62	-0.31	-0.75
GENE1107X	7430	 EZR -  ezrin	1	0.07	-0.04	-0.12	0.23	-0.22	1.21	0.93	-0.03	-0.53	0.23	1.01	0.38	-0.33	0.39	-0.12	-0.08	-0.14	-0.74	0.56	0.06	-0.32	-0.27	-1.42	-0.79	-0.1	-0.8	-0.91	-1.16	-1.8	-0.34	-1.26	-0.74	-0.82	-0.47	-2
GENE1158X	4857	 NOVA1 -  Neuro-oncological ventral antigen 1	1	-0.23	-0.62	-0.08	0.61	0.34	1.22	1.06	0.48	0.41	0.73	0.89	0.82	0.09	-0.3	-0.48	-0.28	-0.28	-0.71	0.21	0.21	0.05	-0.48	-2.21	-1.55	-0.43	-0.78	-1.39	-1.83	-1.27	-1.09	-1.47	0.69	-1.19	-0.16	-3.54
GENE1411X	1654	" DDX3X  -  DEAD (Asp-Glu-Ala-Asp) box polypeptide 3, X-linked"	1	-0.48	0	0.23	0.18	0.07	1.38	0.77	0.44	0.48	0.91	1.29	-0.01	-0.18	-0.03	-0.9	-0.37	-0.05	-1.42	-0.27	0.3	-0.02	-0.02	-0.5	-0.64	-0.55	-0.69	0.45	-1.89	-2.48	-0.33	-0.07	-0.85	-0.49	-0.75	-1.98
GENE658X	23187	" PHLDB1 -  Pleckstrin homology-like domain, family B, member 1"	1	-0.89	-0.22	0.24	0.03	0.84	1.77	0.2	0.39	-0.26	0.16	0.29	-0.48	0	-0.57	-1.17	-1.18	-0.15	-1.04	-0.36	-0.27	-0.18	0.81	-1.35	-2.07	-0.54	-0.35	0.47	-2.6	-3.07	-1.01	-1.03	-0.24	0.5	-0.08	-1.71
GENE1622X	84617	" TUBB6 -  Tubulin, beta 6"	1	-0.3	-0.15	0.07	0.39	0	-0.02	-0.09	-0.17	0.1	0.31	0.3	-0.05	-0.09	-0.27	0.15	-0.06	0.32	-1.53	-0.2	0.66	-0.07	-0.39	-0.58	-1.2	-0.4	-0.22	0.08	-2.08	-2.43	-0.68	-1.63	-0.51	-0.17	0	-1.03
GENE362X	3491	" CYR61 -  Cysteine-rich, angiogenic inducer, 61"	1	0.52	-0.06	-0.22	-0.29	0.04	0.08	-0.19	-0.13	-0.31	-0.72	-0.41	-0.71	-0.39	-0.25	-0.56	-0.25	-0.52	-0.62	0.62	-1.11	0.39	0.09	-2.9	-1.64	0.46	-0.74	-0.8	-5.49	-2.38	-0.1	-0.46	0.3	0.37	-1.23	-2.84
GENE66X	51554	 CCRL1 -  chemokine (C-C motif) receptor-like 1	1	-0.84	-0.02	0.83	-0.36	0.39	0.59	0.11	0.05	0.12	-0.19	0.25	-0.35	-0.47	0.09	-0.14	-0.26	-0.66	-0.57	0.31	-0.14	-0.09	-0.09	-1.25		-0.09	-0.09	-1.16	-3.15		0.08	-1.02	-0.09	-0.56	-0.76	-2.56
GENE1696X	3215	 HOXB5 -  homeobox B5	1	0.18	0.33	-0.08	-0.28	-0.14	0.31	0.33	0.5	0.01	0.48	0.03	-0.14	0.06	0.64	0.68	-0.19	-0.04	-0.29	-0.17	-0.44	0.34	0.28	-0.83	-0.04	-0.01	-0.22	-0.46	-1.89	-2.19	0.05	-0.17	-0.22	-0.23	-0.46	-1.64
GENE693X	7022	 TFAP2C -  Transcription factor AP-2 gamma (activating enhancer binding protein 2 gamma)	1	0.17	0.01	0.85	-0.5	-0.51	1.12	1.41	-0.24	0.1	0.26	0.75	1.18	-0.19	0.33	-0.38	-0.56	0.82	-0.88	0.25	-0.06	0.12	-0.31	-0.88	-0.43	0.14	-0.25	-0.47	-3.42	-2.88	-0.73	0.29	0.25	-0.31	-0.38	-0.32
GENE1743X	63898	 SH2D4A -  SH2 domain containing 4A	1	-0.72	0.28	0.92	-0.62	0.14	0.14	0.01	0.03	0.46	0.38	0.93	0.67	0.43	0.63	-0.51	-0.31	-0.41	-0.73	-0.13	-0.04	-0.05	0.23	-0.59	-0.81	0.12	-0.04	-0.72	-2.24	-2.68	-0.49	-0.17	-0.66	-0.22	-0.37	-0.55
GENE1494X	2670	 GFAP -  Glial fibrillary acidic protein	1	-0.41	-0.43	0.28	-0.43	1.01	-0.08	-0.06	-0.24	-0.17	-0.02	0.01	-0.24	-0.38	-0.13	-0.71	-0.82	-0.22	-0.76	-0.01	0.62	-0.43	-0.17	-0.71	-0.26	-0.26	-1.05	-0.62	-1.94	-1.23	-1.21	-1.01	-1.89	-1.2	-1.29	-0.47
GENE37X	5168	 ENPP2 -  Ectonucleotide pyrophosphatase/phosphodiesterase 2	1	-0.57	-0.08	0.63	-0.26	0.14	-0.1	-0.6	0.03	0.21	-0.11	-0.04	-0.44	-0.2	0.19	-0.55	-0.75	-0.36	-0.71	0.34		-0.43	0.09		-1.07	-0.49	-0.36	-1	-1.8	-1.79	-1.18	-1.05	-1.32	-1.09	-1.07	-0.06
GENE1380X	118472	 ZNF511 -  Zinc finger protein 511	1	-0.68	-0.26	0.27	0.33	0.34	0.53	0.31	0.18	-0.07	0.21	-0.53	-0.25	-0.17	-0.53	-1	-0.95	-0.31	-0.87	0.49	0.28	-0.65	-0.13	-1.03	-1.26	0.08	-1.17	-0.79	-1.95	-2.08	-1.41	-1.37	-0.76	-1.47	-0.52	-0.4
GENE1616X	6651	 SON -  SON DNA binding protein	1	-0.26	-0.3	0.51	0.11	0.2	0.52	-0.35	0.37	0.02	-0.1	0.21	0.62	-0.24	-0.45	-0.1	-0.72	-0.5	-0.44	-0.01	0.15	0.09	-0.23	-0.92	-0.71	-0.87	-1.6	0.09	-1.98	-2.01	-0.82	-0.5	-0.79	-0.14	-0.93	-0.47
GENE1644X	54904	 WHSC1L1  -  Wolf-Hirschhorn syndrome candidate 1-like 1	1	-0.35	-0.35	0.35	-0.12	0.47	0.32	0.21	0.22	0.13	0.13	0.22	0.25	0	-0.33		-0.54	0.14	0.7	-0.01	0.18	-0.07	-0.11	-0.71	-0.21	-0.9	-1.78	-0.57	-2	-1.71	-0.88	-0.68	-0.89	-0.16	-1.05	-0.8
GENE843X	29980	 DONSON -  Downstream neighbor of SON	1	-0.63	-0.57		0.5	0.7	1.38	1.39	0.45	0.42	0.24	1.21	0.25	0.35	0.11	-0.67	-0.53	-0.05	0.35	-0.14	0.38	0.18	-0.42	-0.24	-0.82	-0.11	-1.25	0.04	-1.82	-2.13	-1.16	-0.71	-0.32	0.88	-0.68	-1.03
GENE1108X	79133	 C20orf7 -  Chromosome 20 open reading frame 7	1	-0.12	-0.38	0.13	-0.01	0.4	0.01	0.04	-0.03	0.25	0.31	0.32	0.19	0.32	0.36	0.44	0.04	0.37	-0.07		0.6	-0.06	-0.55	0.16	-0.34	-0.42	-0.36	-0.13	-1.86	-1.63	-1.22	-0.01	-0.12	-0.28	-0.36	-1.01
GENE428X	3298	 HSF2 -  Heat shock transcription factor 2	1	-0.28	0.03	0.19	-0.11	0.15	0.08	0.57	0.03	0.34	0.4	0.33	0.64	0.07	0.22	0.03	0.13	0.32	0.27	0	0.57	0.02	-0.6	-0.2	0.21	-0.57	-0.45	-0.14	-1.84	-0.92	-1.78	-0.42	0	-0.43	-0.16	-0.18
GENE1086X	10693	" CCT6B -  chaperonin containing TCP1, subunit 6B (zeta 2)"	1	-0.18	-0.1	-0.05	-0.18	0.53	0.25	0.41	-0.21	0.45	0.45	0.48	0.47	0.38	0.51	0.22	0.13	0.6	0.26	-0.1	0.34	-0.16	-0.08	0.12	-0.09	-0.34	-0.16	-0.4	-1.75	-1.12	-1.66	-0.62	0.12	-0.69	-0.62	-0.71
GENE36X	132789	 GNPDA2 -  Glucosamine-6-phosphate deaminase 2	1	-0.03	-0.59	0.27	0	0.33	0.13	0.26	-0.14	0.14	0.26	0.33	0.83	0.35	0.28	0.5	0.72	0.87	0.32	0.31	-0.2	-0.1		-0.17		-0.31	-0.48	-1.05	-1.99		-1.88	-0.58	-0.19	-0.65	-0.24	-0.54
GENE920X	3748	" KCNC3 -  potassium voltage-gated channel, Shaw-related subfamily, member 3"	1	-0.43	-0.08	0.35	-0.28	0.45	0.26	0.27	-0.16	0.49	0.63	-0.04	0.59	0.5	0.11	0.31	0.17	1.18	-0.38	0.23	0.37	-0.19	-0.41	-0.38	-0.13	0.56	-0.77	-0.67	-1.65	-1.81	-1.7	-0.35	-0.31	-0.59	-0.59	-0.64
GENE1185X	100113384	" SNORD123 -  Small nucleolar RNA, C/D box 123"	1	-0.7	0.17	0.54	-0.38	0.37	0.27	0.48	0.02	0.45	0.24	0.63	0.31	0.26	0.4	-0.28	-0.84	0.31	-0.57	0.35	0.19	-0.3	-0.24	0.08	-0.27	-0.61	-0.65	-0.86	-2.62	-1.1	-1.63	-0.92	-1.14	-1.11	-0.93	-0.7
GENE1440X	55786	 ZNF415 -  Zinc finger protein 415	1	-0.43	-0.13	0.42	-0.2	0.33	0.59	0.98	-0.1	0.56	0.67	0.82	0.53	0.45	0.79	0.34	0.36	0.46	-0.52		-0.02	-0.09	0.11	0.15	-0.3	-0.09	-0.37	-0.59	-1.79	-1.89	-0.41	-1	-0.37	-0.61	-0.5	-0.45
GENE1102X	151295	" SLC23A3 -  Solute carrier family 23 (nucleobase transporters), member 3"	1	-0.36	-0.17	0.39	-0.24	0.37	0.51	0.36	-0.13	0.5	0.49	0.15	0.9	0.51	0.04	0.44	0.63	0.81	-0.98	0.04	0.54	-0.26	-0.31	-0.56	-0.52	-1.13	-1.45	-0.64	-1.63	-2.08	-1.24	-0.67	-1.7	-1.03	-0.43	-0.79
GENE611X	6856	 SYPL1 -  Synaptophysin-like 1	1	-0.22	-0.57	0.18	0.09	0.51	0.79	1.68	0.08	0.46	0.27	0.64	1.76	0.83	0.97	0.39	0.74	0.69	0.4	-0.08	0.41	-0.09	-0.23	-0.06	-0.54	-0.64	-0.19	-0.64	-1.79	-1.69	-0.47	0.38	0.12	0.03	-0.5	0.83
GENE1436X	4306	" NR3C2 -  Nuclear receptor subfamily 3, group C, member 2"	1	-0.28	-0.5	0.27	0.21	0.29	0.8	0.75	-0.14	0.15	0.58	1.14	0.74	0.56	0.53	0.08	0.2	0.5	0.32	0.09	0.37	-0.27	-0.18	-0.14	-0.97	-0.81	-0.18	-0.49	-1.68	-1.89	-0.46	0.08	-0.13	-0.32	-0.38	-0.24
GENE1748X	3861	 KRT14 -  keratin 14	1	-0.11	0.14	-0.51	0.18	0.29	0.71	0.91	-0.16	-0.11	-0.39	0.53	0.96	0.69	0.58	-0.43	-0.4	-0.11	0.73	0.07	0.22	-0.23	-0.05	-0.01	-1.41	-0.73	-0.18	-0.55	-1.78	-1.94	-0.69	-0.95	-0.78	-0.78	-0.78	0.36
GENE30X	1605	 DAG1 -  Dystroglycan 1 (dystrophin-associated glycoprotein 1)	1	-0.08	-0.7	0.34		0.44	1.22	2.31	0.12	0.04	0.04	2.02	0.99	1.47	1.04	-0.94	-0.5	-0.08	1.29	0.49		-0.17	-0.33		-1.31	0.01	-0.71	-1.24	-2.18	-2.55	-1.5	-1.03	-1.38	-0.57	-0.82	-0.74
GENE1522X	8974	" P4HA2 -  Prolyl 4-hydroxylase, alpha polypeptide II"	1	-0.52	-0.08	0.47	-0.19	0.34	0.98	2.04	0.3	-0.24	0.08	0.99	1.44	0.97	1.12	-0.63	-0.5	-0.15	0.86	0.07	-0.11	-0.08	0.11	-0.05	-0.2	0.21	-0.33	-0.4	-1.98	-2.31	-0.64	-0.36	-0.33	0.04	-0.23	-0.19
GENE1410X	2	 A2M -  Alpha-2-macroglobulin	1	-0.26	-0.05	-0.15	0.25	0.2	1.82	1.77	-0.05	-0.13	0.56	1.19	1.19	1.22	2.44	-0.24	0	0.46	1.01	0.12	0.05	0.02	-0.2	0.07	-0.39	-0.42	-0.38	-0.6	-0.76	-1.18	-0.47	-0.22	-0.44	-0.18	-0.55	-0.33
GENE987X	56647	 BCCIP -  BRCA2 and CDKN1A interacting protein	1	-0.41	-0.75	-0.04	0.77	0.41	0.94	0.96	0.25	0.36	-0.13	0.67	-0.01	0.88	0.7	-0.6	-0.84	-0.86	-0.98	0.34	-0.38	0.22	-0.19	-1.46	-1.19	-0.57	-1.42	0.09	-1.79	-0.73	-1.15	-0.47	-1.6	-0.54	-1.18	-1.03
GENE605X	8655	" DYNLL1 -  Dynein, light chain, LC8-type 1"	1	-0.48	-0.74	-0.36	0.78	0.79	1.72	2.22	0.06	-0.47	-0.53	1.54	0.79	1.37	0.89	-1.04	-1.12	-0.83	-0.22	-0.09	0.43	0.28	-0.61	-1.91	-0.28	-0.62	-0.93	-0.74	-2.23	-2.59	-0.61	-0.42	-1.15	-0.77	-1.26	-1.89
GENE1090X	51003	 MED31 -  Mediator complex subunit 31	1	-0.23	-0.97	-0.09	0.7	0.59	1.32	2.12	0.27	-0.07	0	1.55	1.23	0.72	0.61	-0.9	-0.85	-0.58	-0.54	0.25	0.03	0.57	-0.85	-1.82	-0.37	-1.08	-0.92	-0.76	-1.79	-1.22	-0.75	0.02	-1.33	-0.81	-1.13	-1.56
GENE35X	126917	 IFFO2 -  Intermediate filament family orphan 2	1	-0.56	-0.73	0.14	0.85	0.31	2.06	2.19		0.64	0.32	2.27	0.81	0.68	0.5	-0.65	-0.53	-0.38	-0.28	0.1	-0.32	0.48	-0.25	-1.12	0.29	-0.81	-0.22	0.25	-1.44	-2.08	-1.26		-1.7	-0.15	-0.47	
GENE1132X	163882	" CNST -  Consortin, connexin sorting protein"	1	-0.09	-0.8	0.31	0.57		1.21	1.58	0.5	0.7	0.69	1.47	1.81	1.27	0.09	-0.41	-0.41	-0.22	0.6	0.3	0.05	0.21	-0.55	-0.98	-0.08	-1.17	-1.05	-0.79	-1.43	-0.98	-1.01	-0.36	-1.82	-0.84	-1.43	-1.75
GENE1190X	154043	 CNKSR3 -  CNKSR family member 3	1	-1.21	-0.66	0.46	0.32	1.09	2.33	1.69	0.61	0.83	0.93	1.72	1.82	0.69	0.36	-0.71	-0.14	-0.36	-0.44	0.64	-0.32	0.1	-0.43	-1.73	-0.79	-0.28	-1.23	-2.04	-2.29	-1.48	-0.62	-0.56	-1.9	-1.94	-1.96	-1.66
GENE34X	6539	" SLC6A12 -  Solute carrier family 6 (neurotransmitter transporter, betaine/GABA), member 12"	1	0.35	-1.16	0.1	0.15	0.58	0.52	0.49	0.28	0.41	0.43	0.31	-0.03	0.69	0.69	-0.39	-0.75	-0.31	-0.28	0.09	-0.06	0.35	-0.37	-1.8	-0.3	-1.53	-1.48	-0.72	-1.81		-1.18	-0.55	-2.36	-1.66	-1.68	-1.05
GENE1458X	4681	" NBL1 -  neuroblastoma, suppression of tumorigenicity 1"	1	0.04	-0.33	-0.17	0.17	0.27	-0.04	-0.24	0.2	-0.12	-0.04	0.3	-0.09	0.09	-0.41	-0.53	-0.79	-0.59	-0.73	-0.4	0.29	0.2	-0.1	-1.22	-0.65	-0.66	-1.42	-0.68	-1.44	-2.59	-0.89	-0.88	-1.79	-0.88	-1.41	-0.89
GENE671X	91039	 DPP9 -  Dipeptidyl-peptidase 9	1	-0.42	-0.7	0.11	0.64	0.38	0.95	0.26		0.5	0.12	0.07	-0.13	0.5	0.19	-0.36		-0.43	-0.82		0.09	0.03	-0.12	-1.12	-0.31	-0.64	-1.42	-0.29	-0.87	-2.33	-0.95	-1.07	-1.62	-0.69	-1.32	-1
GENE1585X	9061	 PAPSS1 -  3'-phosphoadenosine 5'-phosphosulfate synthase 1	1	-0.47	-0.25	0.07	0.44	0.2	0.58	1.01	0.21	0.1	-0.14	0.01	-0.14	0.32	0.42	-0.97	-0.68	-0.46	-0.54	-0.06	0.59	-0.32	-0.2	-1.2	-0.89	-0.83	-1.06	0	-1.92	-2.05	-0.65	-1.13	-1.24	-0.86	-1.26	-0.99
GENE668X	284618	 C1orf104 -  chromosome 1 open reading frame 104	1	-0.59	0.03	0.17	0.56	-0.17	0.76	0.66	0.17	-0.29	-0.37	0.58	-1.07	0.21	0.29	-0.99	-0.92	-0.73	-0.32	-0.13	0.18	0.17	-0.21	-1.6	-1.75	-0.53	-1.71	-0.6	-2.11	-2.76	-2	-0.65	-1.43	-1.41	-1.06	-1.69
GENE1321X	122769	 PPIL5  -  peptidylprolyl isomerase (cyclophilin)-like 5	1	-0.49	-0.31	-0.04	0.28	0.55	0.9	0.59	-0.01	-0.01	-0.03	1.03	0.42	0.36	-0.26	-0.88	-0.79	-0.48	-0.28	-0.31	0.39	0.16	-0.23	-1.81	-1.64	-0.35	-1.42	-0.97	-1.9	-2.55	-1.18	-0.51	-1.12	-1.02	-1.1	-1.09
GENE33X	9768	 KIAA0101 -  KIAA0101	1	-0.33	0.04	0.22	-0.08	0.15	0.31	0.35	-0.2	-0.28	-0.42	0.33	-0.18	-0.16	-0.5	-1.29	-1	-0.78	-0.24	-0.21	0.73	-0.12	-0.4	-2.02		-0.55	-0.95	-0.4	-1.73	-2.76	-1.41	-0.97	-0.87	-0.81	-1.23	-1.1
GENE352X	7247	 TSN -  Translin	1	-0.38	-0.74	0.18	0.43	0.51	-0.29	0.25	0.28	0.17	-0.47	0.91	0.11	0.24	-0.17	-0.99	-0.95	-1.05	-0.49	0.56	-0.34	0.37	-0.58	-2.44	-1.02	-0.91	-1.42	-1.12	-2.16	-3.62	-0.97	-1.31	-1.66	-1.01	-1.83	-1.72
GENE1521X	26257	 NKX2-8 -  NK2 homeobox 8	1	-0.21	-0.9	0.38	0.21	0.53	-0.11	0.17	0.08	0.1	-0.1	0.43	-0.17	0.09	-0.13	-1	-0.85	-1.12	-0.77	0.65	0.04	0.22	-0.9	-2.19	-1.45	-1.22	-1.35	-1	-1.91	-1.98	-1.23	-1.02	-1.77	-0.9	-1.69	-1.83
GENE934X	55012	" PPP2R3C -  Protein phosphatase 2 (formerly 2A), regulatory subunit B'', gamma"	1	-0.39	-0.12	0.04	0.46	-0.01	0.78	1.02	0.12	-0.05	0	0.5	0.81	0.15	-0.11	-0.78	-0.82	-0.68	-0.01	0.44	-0.02		-0.42	-1.7	-0.97	-0.78	-1.3	-0.93	-0.88	-2.08	-1.32	-0.29	-1.68	-0.52	-1.2	-1.01
GENE32X	57633	 LRRN1 -  Leucine rich repeat neuronal 1	1	-0.26	-0.1	-0.12	0.42	0.08	0.48	0.3	0.25	-0.06	-0.18	0.49	-0.32	0.53	0.08	-0.58	0.07	-0.86		0.4	0.19	0.14	-0.71	-1.94	-0.92	-1.12	-1.25	-0.14	-1.54		-1.54	-0.17	-1.64	-0.96	-1.81	-1.27
GENE1203X	84101	 USP44 -  ubiquitin specific peptidase 44	1	-0.78		0.38	0.31	0.09	0.43	0.42	0.24	-0.21	-0.05	0.86	0.35	0.22	0.07	-0.8	-0.56	-0.5	-0.08	0.09	0.44	0.05	-0.57	-0.99	-0.99	-0.58	-1.58	-0.12	-1.42	-1.95	-1.25	-0.08	-1.62	-1.41	-1.04	-0.24
GENE650X	51780	 KDM3B -  lysine (K)-specific demethylase 3B	1	-0.84	-0.32	0.77	0.09	0.31	0.59	1	-0.33	0.27	-0.15	1.03	0.31	0.56	0.31	-0.76	-0.68	0.3	0.27	-0.17	0.48	0.35	-0.66	-0.35	-1.19	-0.62	-0.89	-0.18	-1.67	-1.62	-1	0.12	-1.42	-1.09	-0.97	-0.23
GENE1780X	23516	" SLC39A14 -  Solute carrier family 39 (zinc transporter), member 14"	1	-0.46	0.03	0.16	0.03	0.26	0.43	0.65	0.15	-0.02	-0.18	0.28	0.29	0.38	-0.09	-1.02	-0.69	-0.27	-0.21		0.4	-0.3	-0.1	-0.67	-0.51	-0.42	-0.54	-0.98	-1.74	-1.73	-0.88	-1.05	-1.18	-0.36	-0.43	-0.21
GENE1229X	124583	 CANT1 -  Calcium activated nucleotidase 1	1	-0.24	0.1	-0.2	0.05	0.3	-0.1	0.11	-0.3	0.22	-0.29	0.03	0.15	0.34	-0.18	-1.06	-0.75	-0.03	-0.14	0.39	0.46	-0.85		-0.9	-0.58	-0.75	-0.68	-1.27	-1.88	-1.97	-1.35	-1.09	-1.39	-1.28	-1.08	-0.34
GENE1336X	1087	 CEACAM7 -  Carcinoembryonic antigen-related cell adhesion molecule 7	1	-0.53	0.04	0.21	-0.03	0.33	0.58	0.48	0.11	0.29	0.06	0.7	0.55	0.14	-0.11	-0.81	-0.47	-0.47	0.1	0.17	0.55	-0.35	-0.38	-0.34	-0.05	-0.63	-0.76	-1.2	-1.6	-1.42	-1.66	-0.72	-0.98	-1.16	-0.94	-0.51
GENE324X	256302	 C17orf103 -  chromosome 17 open reading frame 103	1	-0.21	-0.13	-0.38	0.53	0.2	1.12	1.23	0.09	-0.09	0.45	0.31	1.45	0.21	0.14	-0.81	-0.01	-0.21		0.66		-0.17	-0.5	-0.7	0.41	-0.14	-1.24	-2.08	-1.14	-2.18	-2.55	-1.49	-2	-1.41	-1.56	-2.23
GENE1603X	25829	 TMEM184B -  CDNA clone IMAGE	1	-0.18	-0.49	-0.46	0.62	0.53	0.8	1.32	0.68	0.25	0.73	0.53	0.59	0.68	0.65	-0.54	0.03	0.12	0.05	0.62	0.35	-0.4	-0.58	-0.43	0.35	-0.36	-0.61	-1.4	-1.87	-1.84	-2.05	-1.24	-1.98	-1.06	-0.79	-1.17
GENE1653X	26086	" GPSM1 -  G-protein signaling modulator 1 (AGS3-like, C. elegans)"	1	0.01	-0.28	-0.6	0.42	0.45	1.26	1.08	0.16	0.24	0.3	0.9	1.16	0.05	0.4	-0.4	0	-0.27	0.29	0.79	0	-0.3	-0.48	-0.66	-0.58	-0.36	-0.85	-0.89	-1.6	-1.62	-2.02	-1.27	-0.35	-1.01	-0.28	-1.27
GENE1224X	23467	 NPTXR -  Neuronal pentraxin receptor	1	0.08	0.2	-0.34	0.22	-0.17	0.22	0.49	0.07	-0.24	0.27	0.46	0.49	0.26	-0.03	-0.72	-0.18	-0.17	0.02	0.41	0.37	-0.39	-0.39	-1.09	-0.63	-0.47	-0.71	-1.24	-2.11	-0.84	-1.53	-0.9	-1.88	-1.13	-0.09	-1.24
GENE676X	22881	 ANKRD6 -  ankyrin repeat domain 6	1	0.03	-0.33	-0.61	0.62	0.31	0.09	-0.21	0.14	-0.16	0.04	0.14	-0.23	0.32	0.22	-0.7		-0.16	0.18	0.6	-0.14	0.16	-0.62	-1.68	-0.63	-0.44	-0.68	-2.02	-2.73	-1.96	-2.19	-1.52	-2.04	-1.23	-0.83	-1.47
GENE1809X	9842	" PLEKHM1 -  Pleckstrin homology domain containing, family M (with RUN domain) member 1"	1	-0.39	-0.48	-0.13	0.39	0.61	0.61	0.71	0.18	0.25	0.77	-0.08	-0.27	-0.06	-0.11	-0.88	-0.38	-0.15	-1.11	0.34	0.09	-0.17	-0.27	-1.01	-0.81	-0.24	-0.83	-1.31	-1.9	-2.22	-1.45	-1.29	-1.41	-1.06	-1.06	-1.37
GENE628X	51308	 REEP2 -  Receptor accessory protein 2	1	-0.92	0.5	-0.35	0.01	0.76	0.41	0.74	0.41	0.22	0.54	0.83	0.31	0.43	0.06	-0.97	-0.34	-0.26	-0.82	0.25	0.37	-0.35	-0.27	-1.49	-1.21	-0.4	-1.17	-1.45	-2.53	-0.86	-1.93	-1.2	-1.95	-1.37	-1.63	-1.7
GENE1034X	57291	 KIAA0114 -  KIAA0114	1	-0.34	-0.18	-0.18	0.21	0.49	1.44	0.89	0.15	0.26	0.62	1.1	0.42	0.65	0.45	0.08	0.25	0.62	-0.32	0.18	0.29	-0.04	-0.44	-0.07	-0.08	0.08	-0.31	-0.57	-2	-1.38	-2.55	-1.84	-0.89	-0.57	-0.69	-0.77
GENE1502X	56849	 TCEAL7 -  Transcription elongation factor A (SII)-like 7	1	-0.23	0.19	-0.16	-0.2	0.4	0.32	0.53	0.07	0.44	0.45	0.82	0.09	0.34	0.45	-0.14	-0.6	0.52	-0.23	0.36	0.2	0.14	-0.71	0.27	-0.41	-0.72	-0.67	-1.14	-2.29	-1.87	-2.55	-2.38	-1.19	-0.75	-0.66	-1.35
GENE1509X	4926	 NUMA1 -  Nuclear mitotic apparatus protein 1	1	-0.13	-0.25	-0.11	0.25	0.24	0.51	0.39	-0.21	-0.24	-0.2	0.4	0.49	0.33	-0.03	-0.29	-0.11	0.17	-0.17	0.34	0.28	-0.28	-0.35	-1.66	-0.79	-0.31	-0.69	-1.2	-1.82	-0.83	-2.02	-1.64	-0.54	-0.88	-0.31	-0.93
GENE1595X	8727	" CTNNAL1 -  Catenin (cadherin-associated protein), alpha-like 1"	1	-0.58	0.12	0.41	-0.23	0.27	1.25	1.11	-0.06	0.3	0.08	1.32	1.16	-0.28	-0.42	-1.04	-0.5	-0.26	-1.23	0.22	0.59	-0.16	-0.66	-1.15	-1.81	-0.54	-0.62	-0.81	-1.91	-1.97	-1.83	-1.57	-0.92	-1.17	-0.8	-0.85
GENE1457X	4430	 MYO1B -  Myosin IB	1	-0.58	-0.03	0.8	-0.32	0.14	0.8	1.08	-0.13	0.41	0.17	1.39	0.6	0.17	0.07	-1.07	-0.95	0.08	-1.36	-0.01	-0.1	0.05	0.06	-0.83	-1.09	-0.48	-0.88	-0.86	-1.6	-1.94	-0.93	-0.54	-0.88	-0.82	-0.51	-0.85
GENE1292X	400555	 C16orf85 -  Chromosome 16 open reading frame 85	1	-0.65	0.65	0.28	-0.38	0.11	0.53	0.3	-0.23	-0.03	0.24	0.6	0.16	0.07	-0.24	-0.74	-0.81	-0.71	-1.23	0.14	0.16	0.09	-0.38	-1.18	-1.47	-0.79	-1.66	-0.14	-2	-1.59	-1.38	-0.28	-1.71	-1.3	-1.38	-0.75
GENE1306X	2050	 EPHB4 -  EPH receptor B4	1	-0.56	0.47	0.24	-0.34	0.2	0.62	0.58	0.4	-0.03	0.44	0.89	-0.24	-0.1	0.68	-0.55	-0.39	-0.82	-0.51	-0.25	0.1	-0.04	0.19	-1.24	-0.88	-0.1	-0.48	-1.07	-1.67	-1.2	-1.93	-1.41	-0.59	-0.65	-0.71	-1.22
GENE868X	2049	 EPHB3 -  EPH receptor B3	1	-0.14	0.37	-0.22	-0.13	0.1	0.53	0.36	-0.1	0.16	0.42	1.03	1.41	0.35	0.28	-0.04	-0.21	0.01	0	-0.87	0.33	0.18	0.36	-1.85	-0.7	-0.13	-1.06	-1.42	-2.2	-1.18	-2.56	-2.22	-1.05	-0.58	-1.39	-1.86
GENE31X	93627	 TBCK -  TBC1 domain containing kinase	1	0	-0.74	0.28	-0.2	0.29	-0.18	-0.09	-0.25	0	-0.58	-0.12	0.14	0.87	0.24	-0.6	-0.36	-0.13	0.25	0.25	-0.25	0.05	-0.04	-1.14		-0.77	-1.22	-1.21	-1.96		-1.94	-1.04	-1.32	-0.81	-1.02	-1.16
GENE501X	4157	 MC1R -  Melanocortin 1 receptor (alpha melanocyte stimulating hormone receptor)	1	-0.51	-0.07	0.3	0.06	0.24	0.2	0.25	-0.19	-0.12	0.18	0.26	-0.94	0.33	0.19	-1.23	-0.49	0.18	-0.4	0.2	0.65	-0.13	-0.71	-0.82	-1.57	-0.63	-0.86	-0.27	-2.26	-0.49	-0.76	-0.29	-1.75	-0.94	-1.16	-0.61
GENE382X	3897	 L1CAM -  L1 cell adhesion molecule	1	-1.09	-0.75	0.66	0.42	0.78	0.08	0.61	0.47		0.97	0.53	-0.42	0.64	0.78	-0.75	-0.86	-0.39	-0.48	0.26	0.75	-0.62	-0.4	-1.65	-1.41	-0.93	-1.36	-0.34	-1.94	-1.17	-1.07	-0.13	-1.68	-1.01	-1.43	-0.79
GENE1163X	23395	" LARS2 -  Leucyl-tRNA synthetase 2, mitochondrial"	1	-1.02	-0.22	0.43	0.28	0.51	-0.05	0.17	-0.05	-0.05	-0.47	-0.06	-0.32	0.24	0.49	-0.98	-1.03	-0.38	-0.73	0.61	0.67	-0.73	-0.55	-1.5	-1.15	-0.96	-1.61	-0.27	-1.93	-2.09	-0.45	0.08	-0.31	-0.35	-1.21	-0.68
GENE732X	56898	" BDH2 -  3-hydroxybutyrate dehydrogenase, type 2"	1	-0.69	-0.39	0.65	0.22	0.21	-0.17	-0.03	-0.23	0.27	-0.31	-0.41	-1.51	-0.02	-0.39	-0.53	-0.73	-0.07	-1.11	0.15	0.19	-0.05	-0.28	-1.53	-2.36	-0.57	-0.86	-0.96	-1.98	-2.42	-0.97	-0.56	-1.25	-1.29	-0.73	-0.39
GENE981X	80328	 ULBP2 -  UL16 binding protein 2	1	-0.76	-0.65	0.49	0.16	0.78	-0.03	0.3	0.22	0.2	-0.03	0.31	-0.59	0.06	-0.24	-0.83	-0.89	-0.18	-0.96	0.03	0.44	-0.41	-0.05	-1.01	-1.41	-0.5	-0.69	-1.31	-1.86	-2.13	-0.4	0.05	-0.98	-0.69	-0.75	-0.49
GENE915X	79801	 SHCBP1 -  SHC SH2-domain binding protein 1	1	-0.84	-0.08	0.71	-0.14	0.33	0.32	0.5	-0.32	0.07	-0.22	0.88	-0.49	0.24	-0.31	-1.27	-1.22	-0.06	-0.57	0.17	0.3	-0.32	-0.16	-0.94	-1.6	0.03	-1	-0.96	-2	-2.23	-0.28	-0.3	-0.37	-1.25	-0.75	-0.92
GENE1685X	23213	 SULF1 -  Sulfatase 1	1	-0.73	-0.06	0.84	-0.57	0.5	0.62	1.08	0.09	1.17	-0.1	0.75	0.27	0.48	0.85	-0.24	-0.23	0.14	-0.58	0.09	0.21	-0.23	-0.06	-0.96	-1.11	-0.37	-0.7	-0.65	-1.94	-1.66	0.12	0.52	-0.7	-0.55	-0.52	-0.28
GENE1593X	51474	 LIMA1 -  LIM domain and actin binding 1	1	-0.59	-0.58	0.56	0.23	0.37	0.49	0.27	-0.02	-0.08	0.11	0.93	0.35	0.52	0.51	-0.99	-0.93	-0.14	-0.31	0.49	-0.51	0.12	-0.11	-2.61	-2.65	-0.52	-1.38	-0.19	-2.74	-3.12	0.26	0.58	-1.67	-0.54	-0.95	-0.85
GENE269X	5764	 PTN -  Pleiotrophin	1	-0.91	-0.06	0.4	0.34	0.22	0.77	0.69	0.01	0.21	0.16	0.86	-0.22	0.41	-0.02	-1.04	-0.75	-0.29	-0.25	-0.17	-0.41	0.5	0.06	-0.69	-2.04	-0.09	-1.67	-0.17	-1.05	-2.44	0.09	1.2	-1.27	-0.65	-0.81	-0.64
GENE874X	83604	 TMEM47 -  Transmembrane protein 47	1			0.55	-0.24	-0.3	0.69	0.75	-0.48	1	0.52	0.57	-0.35	-0.01	0.99	-0.45	-0.36	0.71	-1.75	0.08	0.2	-0.01	-0.27	-0.87	-1.4	-0.94	-0.96	-0.06	-1.79	-2.43	-0.5	-0.12	-1.49	-0.34	-0.36	-0.63
GENE1340X	10904	 BLCAP -  bladder cancer associated protein	1	-0.1	-0.78	0.65	0.24	0	-0.67	-0.99	-1.48	0.06	-0.95	-1.06	-1.69	0.34	0.06	-0.3	-0.12	0.59	-1.14	0.03	0.63	-0.48	-0.17	-1.26	-0.48	-0.37	-0.69	-0.77	-2.32	-2.63	-1.11	-0.88	-0.77	-0.82	-0.46	-1.84
GENE42X	10288	" LILRB2 -  leukocyte immunoglobulin-like receptor, subfamily B (with TM and ITIM domains), member 2"	1	0.15	-0.47	-0.26	0.34	0.23	-1.65	-1.65	0.45	0.09	-0.74	-0.56	-1.79	-0.03	-0.56	-0.25	0	-0.81	-1.3	-0.01	0.31	0.34	-0.63	-1.45	-1.01	-0.77	-0.77	-1.35		-2.41	-1.62	-1.56	-1.4	-1.04	-1.18	-1.94
GENE221X	474343	" SPIN2B  -  spindlin family, member 2B"	1	-0.08	-0.69	-0.14	0.5	0.43	-0.55	-0.26	0.08	0.1	-0.33	-0.75	-2.27	0.57	-0.04	-0.77	-0.49	-0.34	-1.02		0.7		-0.7	-1.28	-1.03	0.12	-0.25	-1.35	-1.75	-0.75	-1.58	-1.75	-1.28	-0.81	0.03	-2.42
GENE1052X	284273	 ZADH2 -  zinc binding alcohol dehydrogenase domain containing 2	1	-0.1	0.02	-0.37	0.44	0.01	-0.06	0.1	-0.31	0.05	-0.81	-0.94	-2.49	0.23	0.4	-0.12	-0.23	0.17	-0.66	0.15	0.4	-0.09	-0.26	-1.8	-0.59	0.14	0.05	-0.52	-2.23	-2.35	-1.94	-1.71	-0.87	-0.47	0.2	-1.98
GENE1523X	2806	" GOT2 -  Glutamic-oxaloacetic transaminase 2, mitochondrial (aspartate aminotransferase 2)"	1	0	-0.19	-0.01	0.01	0.17	-0.75	0.29	-0.16	-0.28	-0.75	-1.21	-1.01	0.14	0.16	-0.63	0.1	-0.13	-0.94	0.16	0.13	0.02	-0.31	-1.25	-1.12	-0.37	-0.77	-0.55	-1.7	-1.81	-0.67	-1.69	-0.2	-0.37	-0.49	-0.71
GENE1702X	54931	 RG9MTD1  -  RNA (guanine-9-) methyltransferase domain containing 1	1	-0.37	-0.12	0.15	0.05	0.28	0.17	0.32	-0.18	-0.07	-0.2	-0.48	-0.92	-0.18	-0.18	-1.23	-0.34	0.05	-1.44	-0.25	0.65	-0.09	-0.31	-0.5	-0.86	0.34	0.28	0.23	-2.42	-2.98	-1.15	-0.96	-0.4	0.83	0.43	-2.06
GENE1557X	6879	" TAF7 -  TAF7 RNA polymerase II, TATA box binding protein (TBP)-associated factor, 55kDa"	1	-0.52	-0.05	0.17	0.2	0.3	1.22	0.11	0	-0.11	-0.08	-0.01	-0.39	0.25	-0.01	-0.28	-0.71	-0.48	-1.94	0.26	0.36	-0.29	-0.15	0.59	-0.15	-0.02	-0.19	-0.75	-2.77	-3.29	-0.37	-0.74	-0.63	-0.29	-0.43	-3
GENE268X	2581	 GALC -  Galactosylceramidase	1	-0.38	-0.15	-0.35	0.36	0.5	0.64	0.79	-0.22	-0.63	-0.8	0.02	-1.96	1	0.36	-0.08	-0.72	-0.03	-2.02	0.39	0.6	-0.25	-0.75	-0.85	-0.23	-1.12	-0.82	-1.33	-2.9	-4.28	-0.95	-1.43	0.96	-0.66	-1.18	-2.42
GENE999X	51188	 SS18L2 -  Synovial sarcoma translocation gene on chromosome 18-like 2	1	-0.3	0.12	-0.36	0.24	0.28	0.53	0.76	-0.06	0.03	-0.39	-0.22	-1.07	0.17	-0.08	0.34	-0.05	0.25	-1.86	0.08	-0.39	0.26	0.05	0.06	-0.34	-0.24	-0.2	-0.12	-1.39	-2.47	-0.35	-0.19	0.33	0.29	0.16	-1.43
GENE1749X	23137	 SMC5 -  Structural maintenance of chromosomes 5	1	0.1	0	0	-0.14	0.04	0.02	-0.27	-0.32	0.05	-0.28	-0.61	-0.8	0.43	-0.05	-0.19	-0.08	0.16	-1.07	0.16	-0.2	0.31	-0.28	-0.23	-0.58	-0.51	-0.35	-0.54	-2.34	-2.25	-1.54	-1.46	0.09	-0.03	0.24	-1.36
GENE734X	203068	" TUBB  -  tubulin, beta"	1	-0.34	-0.15	0.08	0.22	0.2	0.13	0.19	-0.82	-0.01	-0.66	-1.09	-0.54	0.56	0.54	-0.43	-0.49	0.12	-0.51	-0.44	0.33	0.11	0	-0.34	-1.06	-0.27	-0.37	-0.54	-1.79	-2.68	-0.52	-1.66	-0.14	-0.41	-0.46	-1.7
GENE1200X	1108	 CHD4 -  Chromodomain helicase DNA binding protein 4	1	-0.34	0.09	0.14	0.13	-0.02	0.88	0.17	-0.38	-0.51	-0.63	-0.95	-1.11	0.27	0.02	-0.6	-0.48	-0.28	-0.52	0.04	0.23	-0.04	-0.16	-0.52	-0.59	-0.32	-0.43	-0.86	-1.25	-2.31	-1.66	-1.49	-0.39	-0.45	-0.79	-1.47
GENE1390X	127703	 C1orf216 -  Chromosome 1 open reading frame 216	1	-0.7	0.35	0.08	0.05	0.21	0.03	0.25	-0.12	0.13	0.28	-0.34	-0.23	0.74	0.14	0.11	0.48	0.6	-0.63	-1.25	0.9	0.26	0.08	-0.29	0.05	0.28	-0.56	-1.22	-2.15	-3.08	-1.09	-0.96	-0.12	-0.41	-0.46	-1.93
GENE1382X	81554	 WBSCR16 -  Williams-Beuren syndrome chromosome region 16	1	-0.53	0.18	0.13	0.03	0.21	-0.35	0.21	-0.75	-0.12	-0.45	-0.45	-0.45	0.2	-0.1	-1.37	-1.12	0.19	-0.93	-0.2	0.63	-0.23	-0.19	-0.16	-0.4	-0.41	-0.34	-0.68	-1.84	-2.21	-0.87	-0.95	-0.43	-0.74	-0.8	-0.74
GENE1681X	8721	 EDF1 -  Endothelial differentiation-related factor 1	1	-0.58	-0.05	0.04	0.22	0.35	0.05	0.12	-0.08	0.08	-0.13	-0.25	-0.29	0.25	-0.37	-1.28	-1.13	-0.32	-1.07	-0.02	0.53	-0.36	-0.14	-0.01	0.14	-0.69	-0.76	-1.01	-1.67	-1.83	-0.76	-0.32	-0.25	-1.28	-1.08	-0.14
GENE705X	25792	 CIZ1 -  CDKN1A interacting zinc finger protein 1	1	-0.13	-0.02	-0.25		0.4	-0.08	0.19	0.34	0.06	-0.06	-0.09	-0.5	0.54	0.01	-1.15	-0.66	-0.11	-0.78	-0.29	0.33	-0.36	0.32	-0.77	-0.03	-0.75	-0.75	-1.03	-2.23	-2.64	-2.3	-1.31	-0.65	-1.11	-1.24	-0.51
GENE1541X	51755	 CDK12 -  Cyclin-dependent kinase 12	1	-0.5	-0.09	0.09	0.16	0.34	0.08	0.04	0.15	-0.03	-0.26	-0.31	-0.06	-0.14	-0.51	-0.78	-0.38	-0.41	-1.1	0.13	0.17	-0.3	0.05	-0.7	-0.43	-0.75	-0.91	-0.5	-2.11	-2.66	-1.2	-0.76	-0.8	-0.56	-0.73	-1.42
GENE826X	11168	 PSIP1 -  PC4 and SFRS1 interacting protein 1	1	-0.49	0.04	0.14	-0.1	0.36	-0.69	-0.12	-0.07	-0.23	-0.57	-0.5	-0.84	0.05	-0.24	-1.2	-0.77	-0.96	-0.26	0.07	0.55	-0.15	-0.2	-1.48	-0.76	-1.1	-1.27	-0.71	-2.6	-2.22	-1.63	-0.84	-1.09	-0.67	-1.36	-1.07
GENE1143X	84527	 ZNF559 -  zinc finger protein 559	1	-0.3	0.09	0.04	-0.01	0.18	-0.22	0.1	-0.15	-0.61	-0.9	-0.84	-1.16	0.25	-0.08	-0.62	-0.39	-0.52	-1.49	-0.1	0.59	-0.1	-0.39	-0.57	-0.23	-0.68	-0.66	-1.38	-2.3	-1.64	-1.74	-1.05	-0.87	-1.01	-1.2	-1.12
GENE1791X	285381	" DPH3 -  DPH3, KTI11 homolog (S. cerevisiae)"	1	-0.12	0.07	-0.39	0.14	0.29	-0.1	-0.36	-0.11	-0.06	-0.42	-0.62	-0.56	0.18	0.17	-0.45	-0.53	-0.22	-2.24	-0.15	0.13	-0.01	0.02	0.12	0.45	-0.48	-0.31	-0.97	-2.16	-1.9	-1.53	-1.53	-0.73	-0.66	-0.59	-1.02
GENE1041X	283267	 LOC283267 -  Hypothetical LOC283267	1	-0.45	-0.2	-0.06	0.22	0.51	0.43	0.61	0.29	-0.35	-0.77	-0.2	-1.75	1.13	0.33	-0.1	-0.74	0.21	-0.53	-0.01	0.01	-0.01	0.02	-0.32	-0.49	-0.07	-0.74	-0.48	-1.48	-1.98	-1.23	-1.21	-0.85	-0.65	-0.42	-0.97
GENE243X	8574	" AKR7A2 -  Aldo-keto reductase family 7, member A2 (aflatoxin aldehyde reductase)"	1	-0.64	-0.1	-0.09	0.31	0.52	-0.85	0.04	-0.04	-0.14	-0.76	-0.86	-1.56	0.25	0.19	-0.62	-1.11	-0.53	-0.6	0.23	0.34	-0.72	0.15	-0.62	-1.86	-0.47	-0.73	-0.92	-2.17	-2.01	-0.73	-2.25	-1.41	-1.01	-0.74	-0.64
GENE43X	79892	 C10orf119 -  Chromosome 10 open reading frame 119	1	-0.05	-0.85	0.04	0.34	0.53	-0.38	-0.74	0.21	-0.25	-0.38	-1.06	-1.05	0.42		0.05	0.18	0.26	-1.04	-0.02	0.6	-0.13	-0.45	-0.58	-1.64	-1.24	-0.82	0.08	-1.79	-2.35	-1.76	-0.61	-1.59	-0.94	-0.3	-0.76
GENE1387X	55258	 THNSL2 -  Threonine synthase-like 2 (S. cerevisiae)	1	-0.16	-0.56	0.21	0.2	0.3	-0.13	0.02	0.15	0.1	-0.07	-0.48	-0.61	0.29	-0.17	-0.36	0.07	-0.26	-0.96	0.11	0.47	-0.43	-0.14	-0.62	-0.8	-0.99	-0.75	-0.59	-1.66	-1.24	-1.32	-0.83	-1.64	-0.67	-0.67	-0.27
GENE1059X	83451	 ABHD11 -  abhydrolase domain containing 11	1	-0.22	-0.28	0.11	0.05	0.34	-0.58	-0.04	-0.29	-0.02	-0.16	-0.5	0.1	0.07	-0.18	-0.15	-0.13	-0.04	-0.8	-0.14	0.64	-0.12	-0.38	-1.5	-1.85	-0.99	-0.99	-0.84	-2.09	-1.82	-1.63	-0.9	-1.02	-0.62	-0.1	-0.69
GENE1328X	4782	 NFIC -  Nuclear factor I/C (CCAAT-binding transcription factor)	1	-0.07	0.13	0.29	0.32	-0.52	-0.83	-0.58	-0.17	-0.83	-0.22	-0.75	-0.92	-0.89	-0.77	-0.75	-0.57	-0.98	-0.6	0.11	-0.31	-0.19	0.44	-1.7	-2.09	-0.45	-0.98	-1.35	-3.02	-2.84	-2.26	-1.76	-1	-1.07	-1.05	-1.37
GENE840X	25778	 DSTYK -  Dual serine/threonine and tyrosine protein kinase	1	-0.31	-0.19	0.28	0.28	-0.08	-0.64	-0.12	-0.35	-0.18	-0.14	-0.52	-1.36	-0.16	-0.39	-0.69	-0.26	-0.06	-0.2	-0.02	0.43	-0.36	-0.06	-1.04	-0.91	-0.22	-0.34	-0.78	-2.87	-1.21	-2.01	-1.42	-0.72	-0.97	-0.93	-1.17
GENE1472X	79629	 OCEL1 -  Occludin/ELL domain containing 1	1	-0.07	-0.42	0.15	0.08	0.26	-0.66	0	-0.38	-0.13	-0.19	0.1	0.33	0.51	0.6	-0.06	-0.31	0.09	0.92	0.16	0.42	-0.4	-0.19	-0.72	-1.04	-0.27	-0.18	-0.72	-2.41	-1.97	-1.53	-1.41	-0.27	-0.41	-0.5	-0.43
GENE894X	8802	" SUCLG1 -  Succinate-CoA ligase, alpha subunit"	1	-0.53	-0.2	0.12	0.32	0.27	-0.63	-0.14	-0.14	-0.23	-0.34	-0.57	-0.06	0.59	0.19	-0.71	-0.2	-0.21	-0.2	0.03	0.56	0.06	-0.64	-0.52	-1.42	-0.21	-0.67	0.17	-1.68	-2.01	-1.25	-0.91	-0.49	-0.56	-0.44	0
GENE947X	51449	 PCYOX1 -  prenylcysteine oxidase 1	1	-0.15	0.13	-0.11	0.24	-0.11	-0.73	-0.08	-0.02	-0.34	-0.14	-0.25	-0.93	0.15	0.24	-0.83	-0.34	-0.09	0.29	0.11	0.65	-0.24	-0.6	-0.89	-1.5	-0.22	-0.77	-0.55	-1.93	-1.72	-0.77	-0.64	-0.74	-0.48	-0.56	-0.18
GENE242X	54504	" CPVL -  Carboxypeptidase, vitellogenic-like"	1	-0.14	-0.24	-0.58	0.67	0.28	-0.29	-1.22	-0.2	0.14	-0.06	-0.22	-1.29	0.65	0.81	-0.72	0.01	0.3	0.52	0.03	1.08	-0.28	-0.82	-1.02	-1.77	-0.6	-0.81	-1.01	-2.12	-0.93	-1.75	-0.83	-1.5	-1.03	-0.19	-1.06
GENE955X	11264	" PXMP4 -  peroxisomal membrane protein 4, 24kDa"	1	-0.18	0.22	-0.36	0.12	0.18	-0.99	-0.53	-0.18	-0.01	-0.21	-0.43	-1.06	0.16	0.03	-0.41	-0.39	-0.15	-0.27	-0.28	0.52	-0.06	-0.17	-1.16	-1.73	-0.95	-0.49	-0.83	-2.08	-0.94	-2.23	-0.99	-1.4	-0.73	-0.94	-1.17
GENE738X	200942	 KLHDC8B -  Kelch domain containing 8B	1	-0.43	-0.55	-0.19	0.57	0.6	-1.34	-1.55	0.22	0.03	-0.63	-0.55	-1.42	0.22	0.27	-0.77	-0.55	-0.48	0.95	-0.17	0.37	0.17	-0.36	-1.87	-1.06	-0.61	-1.26	-1.45	-1.68	-2.3	-2.32	-1.64	-1.72	-1.1	-1.6	-1.59
GENE963X	4285	 MIPEP -  Mitochondrial intermediate peptidase	1	-0.4	-0.27	-0.06	0.37	0.36	-1.09	-0.02	0.17	0.08	-0.33	-0.79	-0.56	0.32	0.25	-0.91	-0.76	-0.82	0.18	0.48	0.35	-0.2	-0.62	-1.09	-0.57	-0.66	-0.98	-1.2	-1.11	-2.1	-1.63	-1.62	-1.45	-1.27	-1.39	-0.97
GENE1040X	4711	" NDUFB5 -  NADH dehydrogenase (ubiquinone) 1 beta subcomplex, 5, 16kDa"	1	-0.34	0	-0.2	0.16	0.39	-1.24	-0.14	-0.13	-0.32	-0.23	-1.12	-0.67	0.24	0.22	-0.98	-0.35	-0.28	0.12	0.06	0.59	-0.59	-0.05	-0.72	-0.86	-0.38	-1.07	-2.14	-2.27	-1.41	-1.49	-1.15	-1.74	-1.37	-0.85	-1.15
GENE1013X	29068	 ZBTB44  -  zinc finger and BTB domain containing 44	1	-0.81	0.06	0.33	-0.12	0.54	-0.92	-0.9	0.16	-0.27	-0.81	-1.39	-1.71	0.56	0.04	-0.92	-1.01	-0.22	-0.39	0.13	0.3	-0.34	-0.08	-0.95	-0.58	-0.64	-0.98	-1.66	-2.2	-1.61	-1.78	-1.21	-1.66	-1.48	-0.79	-1.08
GENE1785X	23023	 TMCC1 -  Transmembrane and coiled-coil domain family 1	1	0.09	-0.09	-0.14	0.01	0.12	-0.71	-0.76	-0.2	-0.36	-0.75	-1.21	-1.21	0.61	0.43	0.24	-0.28	0.01	-0.07	0.15	0.21	-0.16	-0.19	-1.2	-0.49	-0.57	-1.3	-1.01	-1.65	-1.23	-1.3	-1.28	-0.75	-1.2	-0.88	-1.72
GENE1637X	79815	 NIPAL2 -  NIPA-like domain containing 2	1	-0.13	-0.01	-0.14	0.34	-0.07	-0.57	-0.16	0.34	-0.1	-0.2	0	-1.01	0.38	0.11	-0.27	-0.37	-0.5	-0.26	0.27	-0.4	0.23	-0.09	-1.77	-1.23	-0.34	-1.1	-0.59	-1.6	-0.91	-0.7	-1	-1.03	-1.02	-0.43	-0.64
GENE430X	5510	" PPP1R7 -  Protein phosphatase 1, regulatory (inhibitor) subunit 7"	1	-0.29	-0.8	-0.04	0.69	0.43	-0.36	-0.01	0.16	0.15	-0.37	-0.54	-1.02	0.2	-0.09	-0.77	-1.08	-0.98	-0.9	0.29	-0.12	0.3	-0.48	-2.52	-0.97	-1.1	-1.5	-0.47	-1.99	-2.9	-1.44	-1.58	-1.75	-1.05	0.87	-1.09
GENE727X	10534	 SSSCA1 -  Sjogren syndrome/scleroderma autoantigen 1	1	-0.39	-0.81	0.14	0.88	0.17	0.35	0.01	0.66	0.32	0.41	0.29	-1.47	0.24	0.32	-0.35	-0.33	-0.24	-1.2	-0.49	-0.03	0.52		-1.88	-1.7	-0.35	-1.12	0.17	-2.58	-3.25	-1.1	-1.43	-0.6	-0.26	-0.44	-1.18
GENE1077X	57659	 ZBTB4 -  Zinc finger and BTB domain containing 4	1	-0.54	-0.65	0.34	0.6	0.26	-0.68	-0.38	0.43	-0.08	-0.2	-0.45	-0.94	0.35	0.34	-0.84	-0.91	-0.44	-0.05	-0.95	0.43	-0.01	0.55	-1.44	-1.04	0.05	-1.16	-0.41	-2.88	-2.54	-1.3	-1.23	-0.81	-0.6	-0.88	-1.86
GENE712X	7419	 VDAC3 -  voltage-dependent anion channel 3	1	-0.52	-0.38	0.39	0.74	-0.21	-0.93	0.01	0.44	0.04	-0.06	-0.49	-1.5	0.35	0.34	-0.53	-0.69	-0.74	-0.43	0.07	-0.39	0.6	-0.27	-1.57	-0.4	0.13	-1.22	-0.54	-1.73	-1.9	-1.06	-0.75	-1	-0.62	-0.58	-1.26
GENE852X	93343	" FAM125A -  Family with sequence similarity 125, member A"	1	-0.24	-0.7	0.27	0.7	-0.03	-0.27	0.34	0.36	0.06	-0.09	-0.16	-0.52	0.52	0.36	-0.54	-0.82	-0.63	-0.32	0.19	-0.31	0.37	-0.25	-1.38	-0.36	-0.14	-1.1	-0.38	-1.61	-2.13	-0.35	-0.12	-1	-0.82	-0.8	-1.19
GENE1304X	64745	 METT11D1 -  Methyltransferase 11 domain containing 1	1	-0.4	-0.36	0.15	0.74	-0.11	-0.19	-0.02	0.28	0.08	-0.32	-0.53	-1.56	0.45	0.49	-0.57	-0.52	0.98	0.1	0.24	-0.24	0.33	-0.32	-1.47	-1	-0.36	-1.51	-0.63	-1.74	-2.26	-1.13	-0.86	-1.33	-1.15	-0.58	-1.15
GENE48X	11068	 CYB561D2 -  Cytochrome b-561 domain containing 2	1	-0.41	-0.84	0.1	0.66	0.49	-0.8	-0.42	0.1	0.2	-0.15	-1	-1.7	-0.1	-0.64	-0.6	-0.69			0.4	0.36	0.23	-0.98	-1.44		-1.12	-1.3	-0.8	-1.78	-2.27	-1.25	-0.84	-1.82	-1.18	-1.58	-1.64
GENE1252X	284217	" LAMA1 -  Laminin, alpha 1"	1	-0.38	0.09	0.1	0.15	0.02	0.27	0.33	-0.04	-0.12	-0.22	-0.57	-1.93	-0.03	-0.12	-0.85	-0.58	-0.7	-1.64	0	0.46	0.12	-0.57	-1.52	-0.98	-0.46	-1.23	-0.55	-1.75	-2.31	-1.19	-1.05	-1.27	-1	-1.09	-1.28
GENE733X	79002	 C19orf43 -  Chromosome 19 open reading frame 43	1	-0.13	-0.02	-0.15	0.44	-0.14	0.52	-0.03	0.21	0.05	-0.09	-0.51	-1.61	-0.45	-0.82	-0.19	-0.38	-0.56	-1.45	0.16	0.04	0.26	-0.46	-1.67	-0.79	-0.99	-0.94	-0.57	-2.38	-2.53	-1.13	-0.62	-1.5	-0.82	-0.97	-1.69
GENE1100X	83891	 SNX25 -  Sorting nexin 25	1	-0.33	-0.37	-0.18	0.47	0.41	-0.4	0.3	0.17	0.1	0.02	-0.3	-1.19	0.08	0.06	-0.71	-0.08	-0.59	-0.97		-0.23	1.01	-0.78	-1.03	-0.47	0.21	-0.54	-1.21	-1.73	-1.69	-0.87	-0.62	-1.12	-0.62	-0.26	-1.18
GENE1379X	148789	" B3GALNT2 -  beta-1,3-N-acetylgalactosaminyltransferase 2"	1	-0.11	-0.43	0.06	0.13	0.35	-0.72	-0.27	0.32	0.05	-0.25	-0.32	-0.79	0.31	0.08	-0.01	0.1	-0.21	-0.96	-0.01	0.41	-0.21	-0.19	-0.25	-0.13	-0.7	-0.24	-0.73	-1.82	-1.86	-1.3	-1.06	-0.19	-0.15	-0.66	-0.15
GENE937X	57213	 C13orf1 -  Chromosome 13 open reading frame 1	1	-0.61	0.08	0.13	-0.06	0.45	-0.75	0.05	0.18	-0.21	-0.12	-0.24	-0.67	0.23	0.26	0.15	0.02	-0.26	-0.47	0.08	0.74	-0.06	-0.76	-0.26	-0.13	-0.56	-0.51	-0.47	-1.68	-1.74	-1.85	-1.49	-0.35	-0.73	-0.74	-0.56
GENE1097X	29087	 THYN1 -  Thymocyte nuclear protein 1	1	-0.15	-0.51	0.04	0.23	0.41	-1.13	-0.63	0.06	-0.09	0.03	-1.12	-0.75	0.46	-0.24	0.13	0.18	-0.35	-0.59	-0.1	0.43	-0.06	-0.25	-0.62	-0.19	-0.83	-0.77	-0.54	-1.47	-1.38	-1.92	-1.73	-0.03	-0.62	-0.03	-0.46
GENE1146X	10445	 MCRS1 -  Microspherule protein 1	1	-0.41	0.15	0.13	0.11	0.02	-0.24	-0.52	-0.21	-0.19	-0.05	-0.66	-0.15	0.24	-0.31	0		0.25	-0.75	0.05	0.01	-0.12	0.06	-0.67	0.19	-0.16	-0.65	-0.97	-1.71	-1.73	-1.76	-1.34	-0.25	-0.54	-0.19	-0.87
GENE560X	65110	 UPF3A -  UPF3 regulator of nonsense transcripts homolog A (yeast)	1	-0.22	0.32	-0.01	-0.12	0.04	-0.85	-0.23	-0.1	-0.36	-0.42	-0.76	0.47	0.15	0.1	-0.15	-0.03	0.12	-0.03	0.01	0.15	0.2	-0.35	-0.7	0.22	0.11	-0.63	-1.13	-1.89	-2.05	-2.22	-1.66	0.29	-0.39	-0.09	-1.11
GENE1355X	64780	" MICAL1 -  Microtubule associated monoxygenase, calponin and LIM domain containing 1"	1	-0.06	-0.7	0.15	0.26	0.35	0.22	-1.37	0.02	-0.03	0.29	-0.25	-0.59	0.85	0.64	-0.02	0.06	0.19	1.18	-0.49	0.84	-0.1	-0.25	-0.65	-0.3	-0.49	-0.7	-1.33	-2.37	-2.12	-1.22	-1.75	-0.18	-0.57	-0.59	-1.73
GENE1623X	10087	" COL4A3BP -  Collagen, type IV, alpha 3 (Goodpasture antigen) binding protein"	1	0.05	-0.16	-0.38	0.19	0.3	0.19	-0.33	-0.21	0.08	-0.24	0.11	-0.35	0.67	0.55	-0.09	0.15	0	-0.04	-0.06	0.05	0.07	-0.12	-0.09	-0.01	-0.57	-0.34	-1.49	-1.93	-1.71	-0.63	-1.64	-0.45	-0.38	-0.82	-0.78
GENE1477X	7345	 UCHL1 -  Ubiquitin carboxyl-terminal esterase L1 (ubiquitin thiolesterase)	1	-0.08	0.02	-0.32	0.65	-0.27	0.66	0.73	-0.9	-0.14	-0.08	-0.15	0.34	0.05	0.33	-0.16	-0.21	-0.08	0.12	0.77	-0.69	-0.15	0.08	-0.36	-0.14	-0.38	-0.3	-0.59	-1.46	-1.77	-0.99	-1.06	-1.59	-0.36	-0.43	-0.75
GENE1526X	284565	" NBPF15 -  neuroblastoma breakpoint family, member 15"	1	-0.24	-0.07	-0.28	0.53	0.05	0.17	0.11	0.24	-0.14	-0.12	-0.08	-0.46	-0.08	0.1	-0.29	-0.09	-0.09	-0.1	0.84	-0.83	-0.13	0.13	-0.56	-0.43	-0.09	-0.45	-0.66	-1.62	-1.65	-1.17	-1.36	-1.42	-0.75	-0.3	-0.88
GENE1093X	5467	 PPARD -  peroxisome proliferator-activated receptor delta	1	-0.15	-0.02	-0.05	0.18	0.03	1.03	0.37	-0.26	-0.28	-0.38	-0.27	-0.47	-0.4	-0.14	-0.14	-0.12	-0.78	-0.64	0.76	-0.75	0.32	-0.34	-0.92	-0.69	-0.23	-0.5	-0.57	-1.94	-2.08	-1.41	-1.84	-1.41	-0.6	-0.57	-0.83
GENE1168X	10907	 TXNL4A -  Thioredoxin-like 4A	1	-0.51	-0.07	-0.1	0.46	0.2	0.15	0.11	-0.18	-0.2	0.11	-0.49	-0.89	-0.38	0.14	0.11	-0.27	-0.11	-0.3	0.11	-0.15	-0.03	0.07	-0.53	0.09	0.28	-0.31	-0.58	-0.84	-1.7	-1.64	-1.31	-1.05	-0.56	-0.43	-0.59
GENE471X	10112	 KIF20A -  kinesin family member 20A	1	-0.36	-0.08	-0.06	0.35	0.14	0.96	0.89	0.4	0.11	0.13	0.44	-0.17	-0.09	0.26	0.2	0	0.08	-0.01	0.09	-0.19	-0.03	0.14	-0.62	-0.27	0.06	-0.24	-0.67	-0.55	-1.72	-2.02	-1.09	-1.08	-0.32	-0.23	-1.41
GENE722X	55450	 CAMK2N1 -  Calcium/calmodulin-dependent protein kinase II inhibitor 1	1	-0.23	-0.05	0.32	0.25	-0.31	0.47	0.38	0.62	-0.27	0.03	0.37	0.83	-0.1	0.32	1	0.36	-0.24	1.6	-0.41	-0.41	0.05	0.77	-0.81	-1.4	0.01	0.2	-0.14	-1.09	-2.27	-0.56	-0.31	0.2	-0.04	0.35	-0.29
GENE576X	9833	 MELK -  Maternal embryonic leucine zipper kinase	1	0.48	-0.03	0.17	-0.33	-0.28	0.53	0.99	-0.13	0.26	0.43	0.55	0.75	0.3	0.65	0.39	-0.46	0.41	0.73	-0.32	-0.39	0.47	0.24	-0.9	-1.59	0.07	-0.23	-0.39	-1.5	-2.5	0.67	-0.08	0.56	-0.01	-0.26	0
GENE331X	11041	 B3GNT1 -  UDP-GlcNAc	1	-0.46	-0.15	0.12	0.18	0.3	0.39	0.9	0.13	-0.27	0.09	0.28	1.95	0.59	1.01	0.11	-0.38	-0.03	0.86	-0.03	0.12	-0.29	0.19	-0.1	-1.12	-0.01	0.23	-0.19	-1.33	-2.54	-0.12	0.31	0.19	0.08	-0.35	-0.56
GENE1151X	10459	 MAD2L2 -  MAD2 mitotic arrest deficient-like 2 (yeast)	1	-0.44	-0.07	0.16	0.15	0.21	0.94	1.7	-0.01	-0.17	0.66	0.72	1.36	0.37	0.42	-0.14	-0.28	0.28	1.01	-0.87	0.7	-0.01	0.18	-0.53	-0.65	0.1	0.17	-0.13	-0.64	-1.94	-0.27	-0.4	0.18	-0.09	-0.09	-0.28
GENE306X	10516	 LOC100287962 -  Hypothetical protein LOC100287962	1	-0.79	0.06	0.79	0.44	-0.5	1.88	1.32	-0.23	-0.68	0.69	0.81	1.04	0.06	1.16	0.19	-0.32	-0.05	0.9	-0.1	-0.26	-0.12	0.47	-0.42	-1.96	0.14	-0.07	-0.18	-0.8	-2.63	0.02	-0.08	0.28	-0.02	0.09	-0.2
GENE505X	63967	 CLSPN -  Claspin homolog (Xenopus laevis)	1	-0.49	0.09	0.85	-0.17	-0.28	0.31	1.21	0.03	-0.24	0.47	1.84	1.69	-0.15	0.54	-0.07	-0.68	-0.33	1.03	-0.07	-0.16	-0.2	0.44	-1.6	-3.15	-0.58	-0.29	-0.22	-1.92	-2.61	0.2	0.42	-0.14	-0.27	-0.64	-1.42
GENE1213X	4739	" NEDD9 -  Neural precursor cell expressed, developmentally down-regulated 9"	1	0.12	0.18	0.76	-0.52	-0.53	0.99	1.9	0.31	0.16	0.81	1.53	1.82	-0.48	1.04	0.69	0.46	0.22	0.8	0.25	-0.11	-0.18	0.03	-2.62	-2.15	0.31	0.98	-0.4	-1.63	-2.46	0.27	0.21	0.61	1.1	0.26	-2.34
GENE41X	1301	" COL11A1 -  Collagen, type XI, alpha 1"	1	-0.13	-0.13	0.66	-0.54	0.12	-0.43		0.25	0.27	1.09	0.73	-0.09	0.09	0.11	-0.23	0.01	1.38		0.67	-0.6	-0.58	0.52	-0.67	-1.74	0.13	-0.4	-1.47	-1.8	-2.26	-0.62	-1.88	-0.09	-0.28	-0.67	-1.16
GENE1112X	6567	" SLC16A2 -  Solute carrier family 16, member 2 (monocarboxylic acid transporter 8)"	1	-1.04	-0.01	0.3	0.16	0.61	0.26	-0.09	-0.28	0.1	-0.27	0.25	0.21	-0.05	-0.14	0.16	-0.58	0.25	-0.64	0.51	-0.08	-0.38	-0.05	-2.17	-2.67	-0.65	-0.52	-1.2	-2.08	-1.25	-0.69	-1.52	-0.74	-1.34	-1.32	-1.54
GENE431X	10826	 C5orf4 -  Chromosome 5 open reading frame 4	1	-0.42	0.09	0.3	0.01	0.03	-0.6	-0.47	-0.04	-0.04	0.39	-0.12	-0.66	-0.21	0.33	-0.4	-0.13	0.25	-0.09	0.02	-0.38	-0.21	0.57	-1.56	-2.59	-0.52	-0.46	-1.12	-1.9	-1.31	-1.25	-0.49	-0.82	-1.38	-1.48	-1.18
GENE1590X	27254	" CSDC2 -  Cold shock domain containing C2, RNA binding"	1	0.31	0.07	0.09	-0.41	-0.06	-0.45	-0.52	-0.36	0.31	0.2	-0.17	0.19	-0.05	-0.44	0.2	0.26	0.36	-0.62	0.19	-0.09	-0.24	0.15	-0.92	-1.16	-0.18	-1.04	-0.87	-1.7	-2.04	-1.16	-0.93	-0.21	-0.19	-0.22	-0.9
GENE604X	57125	 PLXDC1 -  Plexin domain containing 1	1	0.34	0.34	0.21	-0.71	-0.18	-0.19	-0.96	-0.26	0.05	-0.73	0.07	-0.21	-0.28	0.32	0.19	0.01	0.14	-0.83	-0.16	0.1	0.04	0.01	-0.66	-1.72	-0.03	-0.33	-1.21	-1.88	-2.22	-0.79	-1.8	-0.61	-0.63	-0.34	-0.86
GENE1022X	5205	" ATP8B1 -  ATPase, aminophospholipid transporter, class I, type 8B, member 1"	1	0.14	0.3	0.43	-0.14	-0.73	0.13	-0.22	-0.13	-0.02	0.26	-0.3	0.1	-0.06	0.44	0.08	-0.69	0.04	-0.63	0.52		-0.33	-0.18	-0.84	-1.83	0.14	-0.91	-1.11	-1.33	-1.61	-0.64	-1.55	-0.18	-0.32	-1.05	-1.48
GENE1414X	6506	" SLC1A2 -  Solute carrier family 1 (glial high affinity glutamate transporter), member 2"	1	0.16	0.2	0.53	-0.61	-0.26	-0.28	-0.32	-0.32	0.09	0.04	0.34	-0.24	0.07	-0.58	-0.72	-0.62	-0.36	-1.62	0.31	-0.89	0.49	0.1	-1.77	-1.71	-0.17	-0.68	-1.25	-1.56	-2.12	-2	-1.98	0.31	-1.12	0.35	-0.81
GENE743X	2941	 GSTA4 -  Glutathione S-transferase alpha 4	1	0.08	0.2	0.23	-0.37	-0.09	-0.08	0.19	-0.01	-0.02	-0.71	0.38	-0.31	0.02	-0.03	-0.94	-1.28	-0.5	-0.92	-0.19	-0.25	0.45	-0.01	-2.11	-1.32	0.61	-1.14	-0.81	-1.68	-2.33	-1.92	-2.25	-0.58	-0.65	-0.57	-0.83
GENE798X	83660	 TLN2 -  talin 2	1	-0.16	-0.14	0.47	-0.02	0.01	0.27	-0.18	0.18	-0.1	0.1	0.29	-0.44	-0.22	0.47	-0.04	-0.81	-0.12	-0.53	-0.41	-0.03	-0.02	0.47	-0.6	-1.26	0.23	0	-0.52	-1.17	-1.64	-1.48	-1.72	-0.22	-0.33	-0.41	-1.37
GENE1207X	9891	" NUAK1  -  NUAK family, SNF1-like kinase, 1"	1	-0.47	-0.19	0.58	-0.12	0.19	0.87	0.25	0.51	-0.06	-0.19	0.17	-0.2	0.22	0.28	-0.28	-0.56	1.12	0.35	0.53	-0.54	0.1	-0.09	-1.3	-1.21	-0.15	-0.61	-0.59	-1.29	-2.08	-1.87	-1.68	-0.54	-0.07	-0.65	-1.26
GENE1005X	10962	" MLLT11 -  Myeloid/lymphoid or mixed-lineage leukemia (trithorax homolog, Drosophila); translocated to, 11"	1	-0.54	0.14	0.67	-0.27	-0.01	0.88	1.16	0.14	-0.15	0.58	0.38	-0.46	-0.26	0.07	-0.05	-0.32	0.52	-0.72	0.49	-0.23	-0.16	-0.09	-0.82	-2.2	0.01	0.51	0.27	-2.09	-2.1	-0.58	-2.02	0.44	-0.03	0.43	-1.01
GENE387X	11075	 STMN2 -  Stathmin-like 2	1	0.67	0.08	0.31	-0.56	-0.5	0.39	0.69	0.21	-0.13	0.17	0.39	-0.17	-0.37	1.5	0.83	-0.67	-0.08	1.01	0.04	-0.38	0.14	0.21	-0.15	-1.42	0.15	-0.05	-0.32	-0.78	-2.56	-0.07	-1.74	0.26	0.18	-0.29	-0.74
GENE237X	23641	" LDOC1 -  Leucine zipper, down-regulated in cancer 1"	1	0.36	0.36	-0.08	-0.35	-0.28	0.88	1.11	0.46	-0.11	0.84	0.27	-0.06	0.45	2.32	0.54	-0.35	0.63	0.21	0.03	-1.12	0.49	0.62	-0.68	-1.67	0.43	0.29	-0.32	-1.79	-3.62	-0.38	-1.34	0.38	0.09	0.08	-1.02
GENE329X	8309	" ACOX2 -  Acyl-Coenzyme A oxidase 2, branched chain"	1	0.47	0.11	0.41	-0.22	-0.79	0.7	0.78	0.25	-0.32	0.25	0.9	-0.08	-0.13	1.92	0.92	-0.43	-0.42	-0.46	-0.13	-0.55	0.17	0.5	-0.99	-1.6	0.29	-0.16	-0.39	-0.76	-1.65	-0.62	-1.12	0.26	0.01	-0.34	-1.02
GENE1515X	23255	 KIAA0802 -  KIAA0802	1	-0.09	0.1	0.18	-0.45	0.27	0.87	0.85	0.24	0.37	0.34	0.41	0.34	0.31	0.8	-0.02	0	-0.06	-0.17	0.29	-0.28	0.09	-0.1	-1.95	-1.33	-0.05	-0.97	-1.32	-1.4	-0.82	-1.23	-2.1	0.11	-0.3	-1.08	-0.41
GENE783X	2273	 FHL1 -  Four and a half LIM domains 1	1	0	0.24	-0.17	-0.02	-0.06	0.42	0.73	0.22	0.16	0.23	0.22	0.17	0.53	1.13	-0.31	0.06	0.25	-0.36	0.1	-0.59	0.67	-0.18	-1.73	-1.11	-0.03	-0.76	-1.29	-1.6	-2.31	-1.16	-2.76	0.24	0.16	-0.7	0.03
GENE38X	57648	 KIAA1522 -  KIAA1522	1	-0.51	-0.02	0.4	0.13	-0.01	0.32	1.77	-0.09	-0.29	-0.2	0.52	-0.01	0.35	0.57	-0.55	-0.52	0.52	-0.03		-0.39	0.06	0.33	-1.44	-1.92	-0.03	0.09	-0.2		-1.85	-0.77	-1.6	-0.23	-0.17	-0.71	-0.17
GENE822X	2318	" FLNC -  Filamin C, gamma"	1	-1.18	0.1	0.15	0.12	0.79	0.36	0.75	0.4	0.24	0.2	0.76	0.47	0.35	0.23	-0.63	-0.66	-0.85	-1.2	0.08	0.21	-0.14	-0.16	-2.12	-2.47	-0.47	-0.59	-0.58	-0.92	-2.33	-1.71	-1.97	-1.9	-0.55	-0.87	-1.36
GENE724X	4628	" MYH10 -  Myosin, heavy chain 10, non-muscle"	1	-0.29	0.04	0.35	-0.22	0.13	0.29	0.7	0.07	-0.13	0.18	0.8	0.03	-0.09	0.6	-0.14	-0.72	-0.44	-0.39	0.51	-0.44	-0.06	-0.02	-0.8	-1.86	-0.41	-0.51	-0.1	-1.4	-1.86	-0.88	-1.21	-1.32	-0.42	-0.62	-0.53
GENE336X	114990	 VASN -  Vasorin	1	-0.61	0.08	0.99	-0.54	0.07	1.11	0.5	0.42	0.64	0.67	1.65	0.52	-0.3	1.36	0.83	0.1	-0.22	-0.64	-0.41	-0.35	0.34	0.41	-0.31	-2.47	-0.07	0.74	0.53	-0.94	-3.04	-0.84	-1.74	-0.64	0.65	0.57	-0.39
GENE657X	23475	 QPRT -  Quinolinate phosphoribosyltransferase	1	-0.94	0.14	0.98	-0.33	0.15	1.11	0.7	0.36	0.27	0.62	1.02	0.14	-0.24	1.02	0.76	-0.22	-0.59	0.01	0.09	-0.28	-0.17	0.36	-0.5	-1.75	-0.01		-0.23	-0.61	-1.8	-0.43	-0.86	0.22	-0.38	-0.19	-0.82
GENE259X	1293	" COL6A3 -  Collagen, type VI, alpha 3"	1	-0.58	0.7	0.66	-0.69	-0.1	0.52	0.78	-0.26	-0.64	-0.29	0.26	0.29	0.38	0.61	0.14	-0.72	-0.49	-0.33	0.18	0.26	0.01	-0.45	0.15	-2.54	-0.4	0.09	-0.21	-1.11	-3.31	-0.04	-1.06	-0.17	-0.39	-0.67	-0.4
GENE389X	165	 AEBP1 -  AE binding protein 1	1	-0.91	0.04	0.52	0.02	0.33	0.2	0.71	0.37	0.17	0.07	0.78	0.29	-0.03	0.7	0.05	-0.59	-0.45	-0.78	-0.29	-0.08	0.05	0.31	-0.2	-2.58	-0.12	-0.2	-0.29	-1.72	-3.36	-0.73	-0.83	0.18	-0.19	-0.76	-0.12
GENE1021X	5673	 PSG5 -  pregnancy specific beta-1-glycoprotein 5	1	0.14	0.13	0.27	-0.68	0.15	0.27	0.58	0.34	-0.01	-0.26	0.18	-0.72	-0.08	0.28	0.05	-0.73	-0.6	-0.27	-0.38	0.05	0.29	0.05	-0.59	-1.59	-0.03	-0.48	-0.54	-1.4	-2.4	-0.3	-0.54	-0.33	-0.4	-0.48	-0.54
GENE752X	1266	" CNN3  -  calponin 3, acidic"	1	-0.12	0.21	0.14	-0.17	-0.05	0.87	0.49	0.47	0.07	0.54	0.16	0.3	-0.28	0.68	0.12	-0.51	-0.02	-0.26	0.15	-0.52	0.04	0.33	-0.61	-1.72	-0.26	-0.02	-0.17	-0.62	-2.37	0.45	-0.32	0.22	0.35	-0.04	-0.77
GENE582X	10231	 RCAN2 -  Regulator of calcineurin 2	1	-0.45	-0.27	0.06	1.06	-0.38	-0.42	-0.32	-0.74	-0.55	-0.17	-0.27	-0.5	-0.66	-0.75	-1.13	-0.65	-0.67	-1.74	0.58	-0.38	0.39	-0.31	-3.29	-4.26	0.09	-0.36	-0.99	-2.35	-3.77	-1.34	-3.76	-0.03	0.14	-0.72	-1.24
GENE1512X	6591	 SNAI2 -  Snail homolog 2 (Drosophila)	1	-0.54	-0.29	0.63	0.17	0.04	0.69	0.97	1.31	0.14	0.43	0.54	0.88	0.22	0.64	0.58	-0.37	-0.46	0.44	0.31	-0.8	0.39	0.1	-2.37	-2.54	0.23	0.69	-0.01	-1.56	-2.02	-1.42	-1.49	-0.34	0.91	-0.06	-0.16
GENE969X	131578	 LRRC15 -  Leucine rich repeat containing 15	1	-0.42	0.08	-0.09	0.19	0.25	1.01	1.16	0.82	0.19	0.45	1.2	1.28	0.02	1.03	1.07	-0.41	-0.43	0.65	-0.04	-0.26	0.04	0.25	-1.38	-3.57	0.12	0.16	-0.32	-2.03	-3.42	-0.63	-0.64	-1.35	-0.13	-0.06	-0.34
GENE52X	57153	" SLC44A2 -  solute carrier family 44, member 2"	1	-0.08	-0.01	0.13	-0.02	-0.04	0.4	-0.09	0.05	-0.18	0.85	2.07	-0.09	-0.12	-0.01	-0.12	-0.09	-0.21	-0.38	0.38	-0.4	0.16	-0.14	-1.17	-1.81	0	-0.31	-0.65	-1.01	-2.79	-0.49		0.61	-0.05	-0.68	-0.38
GENE830X	6839	 SUV39H1 -  Suppressor of variegation 3-9 homolog 1 (Drosophila)	1	-0.08	-0.33	0.29	-0.05	0.17	-0.2	-0.07	0.31	-0.28	0.17	1.03	0.19	-0.39	-0.44	-0.08	-0.07	-0.17	-0.2	0.7	-1.28	0.53	0.05	-1.75	-3.04	-0.54	-0.72	-0.96	-1.99	-2.87	-0.45	-0.93	0.01	0.16	-0.61	-0.37
GENE1546X	9610	 RIN1 -  Ras and Rab interactor 1	1	0.09	-0.08	-0.25	0.1	0.14	-0.26	0.53	0.25	-0.15	0.23	0.23	0.05	-0.03	0.05	-0.35	0.05	-0.48	0.04	-0.35	-0.4	0.55	0.2	-1.85	-1.53	0.2	-0.3	-0.45	-1.28	-1.34	-0.98	-1.83	-0.4	0.09	-0.24	-0.71
GENE39X	3015	" H2AFZ -  H2A histone family, member Z"	1	-0.65	0.04	-0.01	0.09	0.53	1.11	1.14		-0.16	0.25	1.59	1	-0.06	-0.07	-0.59	-0.71	-0.47	-0.5	-0.57	0.69	0.06	-0.19	-1.42		-0.03	-0.75	-0.87	-2.02	-2.06	-1.62	-1.26	0.2	-0.35	-0.76	-1.54
GENE1532X	10602	 CDC42EP3 -  CDC42 effector protein (Rho GTPase binding) 3	1	-0.35	-0.14	0.17	0.17	0.08	2.65	1.77	0.34	0.39	0.97	1.5	1.11	-0.13	0.2	0.46	0.47	0.57	1.13	0.14	0.06	-0.41	0.19	-0.89	-1.13	0.05	0.22	-0.25	-1.56	-2.75	0.09	-1.82	0.26	0.32	-0.19	-2.62
GENE1085X	6624	" FSCN1 -  Fascin homolog 1, actin-bundling protein (Strongylocentrotus purpuratus)"	1	-0.25	-0.1	0.24	0.03	0.1	3.25	3.84	0.12	-0.21	0.68	1.54	1.49	0.83	1	0.02	-0.24	0.59	-0.14	-0.32	-0.36	-0.09	0.77	-1.81	-2.17	0.16	0.29	-0.14	-2.16	-3.45	-1.22	-3.17	0.13	0.42	0.31	-1.18
GENE1726X	5916	" RARG -  Retinoic acid receptor, gamma"	1	-0.06	-0.16	0.37	-0.21	0.05	2.54	2.52	0	-0.09	-0.02	1.62	1.66	0.24	0.65	-0.22	0.01	-0.02	0.61	0.09	-0.47	-0.33	0.71	-0.82	-2.36	0.29	0.4	-0.22	-1.51	-1.95	-0.64	-0.79	0.12	0.06	-0.22	-1.22
GENE1610X	54742	" LY6K -  Lymphocyte antigen 6 complex, locus K"	1	0.17	-0.27	0.27	-0.21	0.06	2.45	1.52	0.23	-0.3	0.72	1.7	1.56	-0.68	-0.7	-0.37	-0.28	-0.47	-0.27	-0.14	-0.54	0.44	0.23	-2.51	-3.31	-0.42	-0.48	-0.69	-2.2	-2.9	-0.54	-1.49	0.29	-0.13	-0.85	-1.77
GENE1461X	9232	 PTTG1 -  Pituitary tumor-transforming 1	1	0.38	-0.01	-0.32	-0.01	-0.05	2.17	2.35	0.09	0.05	0.56	2.71	3.22	0.66	0.27	0.16	-0.05	0.11	0.67	0.35	-0.23	0.12	-0.23	-1.87	-2.22	0.05	-0.28	-0.77	-2	-2.52	-0.52	-1.2	0.38	-0.17	-0.36	-1.44
GENE1767X	3838	" KPNA2 -  Karyopherin alpha 2 (RAG cohort 1, importin alpha 1)"	1	-0.26	-0.16	0.14	0.09	0.11	1	1.21	-0.03	-0.21	0.21	1.24	1.44	0.18	0.19	0.34	-0.41	-0.27	0.3	0.05	-0.14	-0.2	0.28	-1.42	-1.43	-0.06	-0.19	-0.79	-1.63	-2.54	0.22	-0.47	0.34	0	-0.38	-1.42
GENE970X	6840	 SVIL -  Supervillin	1	-0.2	0.35	0.27	0.03	-0.28	1.03	1.08	0.19	-0.23	0.32	0.46	0.93	-0.47	-0.11	0.28	-0.35	-0.35	0.85	0.28	-0.18	-0.26	0.16	-1.86	-2.29	-0.32	-0.12	-0.81	-1.58	-2.88	-0.73	-2.52	-0.2	-0.23	-0.35	-0.96
GENE1279X	991	 CDC20 -  cell division cycle 20 homolog (S. cerevisiae)	1	-0.24	0.04	-0.11	0.27	0.04	0.96	0.99	0.09	-0.24	0.07	1.09	1.55	-0.42	0.14	-0.13	-0.41	-0.58	0.72	-0.04	-0.74	0.38	0.4	-1.82	-1.5	0.47	-0.25	-0.85	-2.04	-2.04	-1.06	-2.13	-0.83	-0.32	-0.25	-1.08
GENE1687X	741	" ZNHIT2 -  Zinc finger, HIT type 2"	1	-0.2	-0.08	-0.03	0.17	0.13	0.66	1.24	-0.25	-0.3	-0.17	1.19	1.13	0.19	0.11	-0.08	-0.22	0.36	0.02	0.29	0.06	-0.25	-0.11	-1.97	-1.66	0.03	-0.43	-0.81	-0.92	-1.06	-0.63	-1.52	-0.39	-0.73	-0.15	-1.22
GENE1142X	151246	 SGOL2 -  shugoshin-like 2 (S. pombe)	1	0.11	0.09	-0.18	0.14	-0.16	0.69	1.13	-0.03	-0.69	-0.14	0.87	0.66	0.42	0.41	-0.18	-0.59	-0.09	0.87	-0.08	-0.07	0.35	-0.2	-1.31	-1.66	0.03	-0.68	-1.31	-1.68	-2.29	-0.2	-1.25	0.03	-0.43	-0.72	-1.68
GENE1594X	286827	 TRIM59 -  Tripartite motif-containing 59	1	-0.16	-0.04	0.47	-0.27	-0.02	0.92	0.54	-0.03	-0.06	-0.15	0.82	0.22	0.05	0.1	-0.01	-0.23	0.06	-0.15	0.27	-0.16	-0.09	-0.02	-1.17	-1.16	-0.26	-0.57	-1.12	-1.62	-1.1	-0.68	-1.1	-0.11	-0.62	-1	-1.63
GENE1079X	259266	" ASPM -  asp (abnormal spindle) homolog, microcephaly associated (Drosophila)"	1	0.05	0.08	0.55	-0.43	-0.24	0.6	0.67	-0.09	0.08	0.16	0.68	-0.19	0.03	0.6	-0.32	-0.5	0.17	-0.21	-0.1	0.22	0.06	-0.16	-1.29	-2.19	-0.46	-0.68	-1.05	-1.84	-1.7	-0.56	-1.17	-0.21	-0.77	-0.79	-1.52
GENE1301X	5347	 PLK1 -  Polo-like kinase 1 (Drosophila)	1	-0.11	0.06	0.31	-0.25	0	0.42	0.74	-0.18	-0.12	-0.06	1.12	0.7	0.06	0.25	-0.31	-0.45	-0.09	0.16	-0.06	0.09	0.05	-0.09	-1.8	-1.81	-0.15	-0.67	-0.9	-1.93	-1.33	-0.4	-1.85	0.08	-0.33	-0.68	-0.99
GENE1483X	3357	 HTR2B -  5-hydroxytryptamine (serotonin) receptor 2B	1	0.26	-0.09	0.16	-0.25	-0.1	0.35	0.78	-0.2	0.03	-0.37	0.2	0.29	0.03	-0.02	-0.01	-0.12	-0.28	0.25	0.52	-0.23	0.11	-0.41	-1.95	-2.54	-0.04	-0.49	-1.35	-1.72	-0.9	-0.12	-0.95	-0.52	-0.57	-1.06	-1.44
GENE778X	6790	 AURKA -  Aurora kinase A	1	0.19	-0.11	-0.12	-0.05	0.06	0.47	1.17	-0.46	-0.92	-1.04	0.56	0.28	0.38	0.06	-0.49	-0.78	-0.17	-0.15	0.28	0.03	0.17	-0.48	-2.5	-2.48	-0.12	-0.69	-1.38	-2.63	-1.17	-0.41	-1.74	0.14	-0.65	-0.78	-1.86
GENE1844X	4001	 LMNB1 -  Lamin B1	1	0.06	-0.04	-0.02	0.31	-0.3	0.33	0.38	-0.61	-0.55	-0.3	-0.14	-0.07	-0.01	0.47	-0.58	-0.52	-0.03	-0.47	0.43	-0.21	0.28	-0.49	-2.25	-2.4	-0.34	-0.78	-1.41	-1.88	-1.66	-0.49	-0.84	-0.11	-0.34	-1.09	-1.53
GENE725X	51200	 CPA4 -  Carboxypeptidase A4	1	-0.63	-0.39	0.58	0.66	-0.23	0.1	0.32	0.09	0.08	-0.39	0.84	-0.06	0.45	-0.13	-1.13	0.26	-0.69	-0.68	0.09	-0.5	0.5	-0.09	-2.92	-1.83	0.09	-1.18	-0.56	-1.5	-2.85	-0.95	-0.73	-0.61	-0.76	-0.81	-1.32
GENE626X	25903	 OLFML2B -  Olfactomedin-like 2B	1	-0.22	-0.29	0.22	0.38	-0.1	-0.45	-0.34	0.2	-0.03	-0.36	0.48	-0.71	0.16	0.4	-0.71	-0.59	-0.64	-0.8	0.4	-1.04	0.92	-0.28	-2.31	-2.47	0.38	-1.14	-0.52	-1.85	-2.94	-1.02	-1.41	-0.63	0.16	-0.8	-1.17
GENE1814X	4130	 MAP1A -  Microtubule-associated protein 1A	1	0.25	0.3	0.15	-0.42	-0.29	-0.12	-0.26	0	-0.11	0.09	0.02	-0.19	0.03	0.18	0.11	-0.62	-0.25	-0.52	0.11	-0.61	0.34	0.16	-1.19	-0.86	0	-0.22	-0.77	-1.83	-1.96	-1.46	-2.12	-0.12	-0.44	-0.55	-1.74
GENE272X	54796	 BNC2 -  basonuclin 2	1	0.89	0.47	0.49	-1.09	-0.74	-0.57	0.17	-0.25	-0.37	-0.4	-0.11	-1.65	0.2	0.75	0.32	-0.62	-0.18	0.45	0.34	-0.56	0	0.22	-2.48	-1.42	0.04	-0.49	-1.11	-2.92	-3.52	-1.6	-3.1	0.41	0.06	-1.11	-2.65
GENE532X	9064	 MAP3K6 -  Mitogen-activated protein kinase kinase kinase 6	1	-0.06	-0.04	0.5	-0.02	-0.38	0.01	0.71	0.58	-0.37	0.2	-0.14	-0.34	-0.08	0.55	-0.24	-0.29	-0.27	0.43	0.41	-1	0.29	0.31	-1.63	-1.49	0.27	-0.81	-1.1	-1.26	-2.47	-0.54	-2.03	-0.33	-0.53	-0.56	-1.73
GENE232X	2201	 FBN2 -  Fibrillin 2	1	0.17	-0.24	0.39	0.04	-0.34	0.17	-0.16	0.52	-0.4	0.13	-0.18	-0.68	0.03	0.72	-0.23	-0.19	0.1	0	0.63	-1.05	0	0.41	-0.82	-1.69	-0.28	-0.4	-1.05	-0.96	-2.77	-0.88	-2.21	-0.05	-0.06	-0.92	-1.34
GENE1308X	283742	" FAM98B -  Family with sequence similarity 98, member B"	1	-0.11	-0.31	0.34	0.23	-0.14	-0.32	-0.14	0.29	-0.23	-0.36	-0.96	-0.89	-0.1	0.29	-0.01	0.07	-0.08	-0.36	0.53	-0.94	0.31	0.11	-1.1	-1.27	-0.57	-0.47	-1.16	-1.11	-2.26	-0.9	-1.21	0.08	0.1	-0.62	-1.64
GENE1349X	80727	 TTYH3 -  Tweety homolog 3 (Drosophila)	1	-0.38	-0.12	-0.01	0.22	0.28	0.39	-0.02	0.19	-0.1	-0.08	-0.39	-0.72	0.1	0.36	-0.09	0.03	0.24	-0.46	-0.06	0.03	-0.32	0.37	-1.58	-2.27	0.29	0.14	-0.52	-1.29	-2.56	-0.5	-1.92	0.94	0.37	-0.2	-0.31
GENE333X	85352	 KIAA1644 -  KIAA1644	1	-0.24	-0.32	0.68	-0.25	0.11	0.47	0.24	0.33	-0.21	-0.07	-0.24	0.03	-0.05	0.57	0.03	-0.08	-0.53	0.05	0.19	-0.17	-0.34	0.34	-0.93	-2.58	-0.34	0.46	0.14	-1.05	-1.62	-0.01	-1.98	-0.06	0.09	0.29	-0.31
GENE621X	5159	" PDGFRB -  Platelet-derived growth factor receptor, beta polypeptide"	1	-0.31	0.04	0.24	0.04	-0.02	0.16	0.85	0.1	-0.06	0.2	0.1	-0.17	0.17	0.41	0.23	-0.2	0.1	0.05	-0.04	-0.26	-0.13	0.42	-0.38	-1.67	0.05	0.18	-0.07	-0.65	-1.32	-0.74	-1.78	-0.2	-0.1	0.06	-0.06
GENE205X	358	 AQP1 -  Aquaporin 1 (Colton blood group)	1	-0.36	0.1	-0.14	0.09	0.31	0.33	0.55	0.26	0.04	0.25	0.56	0.58	-0.14	0.3	-0.08	-0.2	-0.57	0.17	-0.42	-0.02	0.16	0.29	-1.59	-3.58	0.35	-0.01	-0.28	-2.08	-3.01	-0.93	-2.94	-1.3	-0.37	0.13	-0.07
GENE1135X	3251	 HPRT1 -  Hypoxanthine phosphoribosyltransferase 1	1	-0.1	-0.14	0.15	-0.03	0.13	0.99	0.6	0.27	0.22	0.64	0.25	0.69	-0.17	-0.02	0.03	0.14	-0.12	-0.11	0.1	-0.22	0.17	-0.01	-1.45	-1.99	0.29	-0.03	-0.46	-0.9	-2.34	0.26	-1.15	0.23	0.27	-0.52	-0.51
GENE479X	5376	 PMP22 -  Peripheral myelin protein 22	1		-0.36	0.28	-0.13	0.2	1.01	0.36	0.67	0.2	-0.12	1.58	-0.21	-0.73	-0.26	0.24	-0.24	-0.5	-0.44	-0.02	-0.12	-0.24	0.37	-1.67	-3.03	-0.08	0.21	0.02	-2.32	-3.71	-0.15	-1.87	0.14	0.06	-0.16	-0.69
GENE597X	5193	 PEX12 -  Peroxisomal biogenesis factor 12	1	-0.45	-0.13	0.41	0.04	0.13	0.86	0.37	0.57	0.04	-0.01	1.33	-0.2	-0.36	0.02	0.29	-0.12	-0.39	-0.24	0.15	-0.3	-0.22	0.36	-1.03	-2.22	-0.04	0.23	-0.01	-1.44	-3.11	-0.08	-1.53	0.32	0.19	-0.05	-0.64
GENE476X	84823	" LMNB2 -  Transcribed locus, moderately similar to XP_002345172.1 PREDICTED"	1	-0.4	-0.14	0.32	0.23	0.01	0.7	0.7	-0.3	-0.46	-0.52	0.3	-0.35	0.41	0.54	-0.17	-0.62	0.03	0.08	0	-1	0.34	0.67	-0.5	-2.6	0.04	0.09	-0.12	-1.83	-3.02	-0.75	-1.73	0.06	0	-0.01	-1.01
GENE1460X	25959	 KANK2 -  KN motif and ankyrin repeat domains 2	1	0.03	0.04	0.33	-0.01	-0.37	0.13	0.02	0.26	-0.15	0.08	0.17	-0.45	-0.28	0.45	0.15	-0.48	-0.36	0.57	-0.65	-0.12	0.31	0.45	-0.86	-1.81	0.03	0.09	-0.5	-1.69	-1.66	-0.9	-0.98	0.18	-0.26	-0.17	-1.24
GENE675X	54892	" NCAPG2 -  Non-SMC condensin II complex, subunit G2"	1	0.16	-0.08	-0.06	-0.02	0.01	0.23	0.05	0.12	-0.21	-0.47	-0.35	-0.55	0.26	0.3	-0.18	-0.06	-0.22	0.38	0.36	0.05	0.11	-0.51	-1.85	-2.97	-0.09	-0.1	-0.77	-0.99	-1.92	-0.49	-1.57	0.36	-0.08	-0.57	-1.47
GENE235X	1510	 CTSE -  cathepsin E	1	0.64	0.29	-0.06	-0.49	-0.37	-0.24	0.15	-0.66	-0.5	-0.08	-0.47	-1	-0.57	0.24	-0.57	-0.33	0.03	-0.03	0.41	-0.17	-0.14	-0.12	-1.36	-3.19	0.05	-0.22	-0.47	-1.14	-2.96	-0.67	-2.41	0.28	-0.17	-0.34	-0.88
GENE613X	4856	 NOV -  Nephroblastoma overexpressed gene	1	0.32	-0.37	0.39	-0.12	-0.23	0.22	-0.13	-0.11	-0.38	-0.37	-0.67	-0.78	-0.45	0.25	-0.29	-0.19	-0.22	-0.12	0.11	-0.24	0.31	-0.18	-1.03	-2.28	-0.09	-0.21	-0.42	-0.94	-2.72	-0.13	-1.16	-0.06	-0.37	-0.58	-0.75
GENE661X	7083	" TK1 -  Thymidine kinase 1, soluble"	1	0.66	0.09	-0.14	-0.37	-0.25	-0.43	-0.42	0.02	-0.32	-0.42	-0.44	-0.12	-0.25	-0.19	-0.05	-0.55	-0.5	-0.31	0.42	-0.34	0.22	-0.3	-1.63	-2.23	0.09	-0.37	-0.79	-1.29	-2.79	-0.11	-0.95	0.1	-0.31	-0.5	-0.74
GENE61X	5549	 PRELP -  Proline/arginine-rich end leucine-rich repeat protein	1	-0.17	0.12	0.26	-0.41	0.18		-0.37	-0.14	-0.18	-0.17	-0.98	-0.12	-0.32	-0.16	-0.02	-0.25	-0.53	-0.55	0.19	-1.01	0.06	0.77	-1.17	-2.87	-0.09	-0.52	-1.07	-2.54	-3.29	-0.97	-1.84	-0.81	-0.8	-0.46	-0.61
GENE1274X	4320	 MMP11 -  Matrix metallopeptidase 11 (stromelysin 3)	1	-0.21	0.04	0.4	-0.09	-0.14	-0.18	-0.19	0.07	-0.14	0.25	-0.11	-0.03	0.14	0.41	0.18	-0.15	-0.03	0.44	0.19	0.02	-0.11	-0.1	-1.51	-3.18	-0.79	-0.68	-1.18	-1.79	-2.73	-0.78	-1.48	-1.17	-0.89	-1	-1
GENE1874X	6601	" SMARCC2 -  SWI/SNF related, matrix associated, actin dependent regulator of chromatin, subfamily c, member 2"	1	-0.38	-0.08	0.16	0.24	0.11	-0.02	0.05	-0.06	-0.34	-0.44	-0.47	-0.57	0.26	0.16	-0.1	-0.31	-0.27	-0.08	-0.21	0	0.01	0.2	-1.48	-1.46	0.02	-0.88	-0.8	-2.24	-2.22	-0.88	-0.92	-0.79	-0.75	-0.59	-1.14
GENE1496X	4171	 MCM2 -  Minichromosome maintenance complex component 2	1	-0.11	-0.23	0.06	0.16	0.11	-0.48	0.07	-0.05	-0.37	-0.16	-0.66	-0.81	-0.15	0.36	-0.42	-0.36	-0.22	0.08	-0.11	-0.51	0.37	0.24	-1.89	-1.65	-0.16	-0.52	-0.42	-1.6	-1.8	-0.86	-1.01	-0.45	-0.2	-0.56	-0.75
GENE828X	4153	" MBL2 -  Mannose-binding lectin (protein C) 2, soluble (opsonic defect)"	1	0.01	-0.05	0.05	0.08	-0.07	-1.01	-0.56	0.32	-0.29	-0.5	-1.01	-1.15	0.27	-0.17	-0.35	-0.51	0.44	-0.28	-0.21	-1.07	0.75	0.53	-2.23	-1.73	-0.29	-0.69	-1.28	-2.87	-3.24	-1.66	-1.18	-0.21	-0.15	-0.76	-1.46
GENE1727X	6929	 TCF3 -  Transcription factor 3 (E2A immunoglobulin enhancer binding factors E12/E47)	1	-0.11	-0.22	0.23	-0.02	0.11	-1.02	-0.6	-0.15	-0.08	-0.19	-0.5	-1.06	0.47	0.43	-0.03	0.04	0.03	0.34	0.01	0.02	-0.23	0.31	-1.43	-1.57	-0.31	-0.41	-0.94	-2.03	-2.7	-1.06	-1.41	-0.17	-0.34	-0.56	-1.65
GENE1459X	29903	 CCDC106 -  Coiled-coil domain containing 106	1	-0.02	-0.11	0.2	-0.04	-0.01	-0.29	-0.25	0.27	-0.34	0.02	-0.23	-0.67	0.16	0.46	0.13	-0.62	-0.38	-0.4	-0.05	-0.12	-0.28	0.44	-0.98	-1.32	-0.03	-0.06	-0.6	-1.62	-2.83	-0.64	-0.81	-0.22	-0.16	-0.76	-0.98
GENE911X	51659	 GINS2 -  GINS complex subunit 2 (Psf2 homolog)	1	-0.44	0.46	0.41	-0.13	-0.29	-0.34	-0.18	0.02	-0.47	-0.16	0.1	-0.11	0.39	0.7	-0.01	-0.87	-0.46	0.24	-0.08	-0.06	-0.13	0.28	-1.46	-2.23	-0.27	-0.03	-0.38	-1.78	-3.14	-0.37	-0.47	-0.44	0.39	-0.22	-1.34
GENE1794X	9585	 KIF20B -  Kinesin family member 20B	1	-0.32	0.44	-0.16	0.2	-0.02	-0.04	0	0.08	-0.17	-0.19	-0.17	-0.15	0.02	-0.04	-0.19	-0.3	0.06	-0.02	-0.29	0.28	-0.05	0.05	-1.36	-2.13	-0.69	-0.65	-0.73	-1.91	-2.01	-0.65	-0.9	-0.31	-0.38	-0.7	-1.42
GENE1047X	3217	 HOXB7 -  Homeobox B7	1	-0.13	-0.07	0.77	-0.42	-0.17	0.19	0.13	0.19	-0.11	0.25	0.06	0.14	0.17	0.78	0.14	-0.19	-0.1	-0.41	-0.15	-0.47	0.28	0.34	-1.29	-0.95	-0.03	-0.31	-0.81	-1.79	-2.31	-0.35	-1.06	0.21	0.02	-0.59	-1.45
GENE1470X	23396	" PIP5K1C -  Phosphatidylinositol-4-phosphate 5-kinase, type I, gamma"	1	-0.41	-0.11	-0.35	0.3	0.55	0.49	0.38	0.87	-0.29	0.16	-0.01	-0.1	0.41	0.08	-0.23	-0.09	0.28	-0.19	-0.14	0.37	-0.28	0.05	-1.19	-1.32	-0.75	-0.74	-1.22	-2.63	-2.44	-1.34	-2.27	-0.47	-0.52	-0.73	-0.73
GENE1690X	7423	 VEGFB -  Vascular endothelial growth factor B	1	-0.27	-0.36	0.26	0.1	0.26	0.24	0.03	0.13	0.1	0.27	0.12	-0.45	0.44	0.22	-0.26	-0.04	0.45	-0.05	0.08	0.2	-0.43	0.14	-0.81	-0.79	-0.46	-0.3	-0.75	-2.06	-2.33	-1.17	-1.72	-0.2	-0.59	-0.57	-0.96
GENE567X	2615	 LRRC32 -  Leucine rich repeat containing 32	1	-0.41	-0.3	0.66	-0.2	0.26	0.35	0.44	0	0.35	0.82	0.62	0.58	0.73	0.44	-0.03	0.16	0.64	-0.74	0.35	-0.44	-0.22	0.31	-1.08	-2.67	-0.6	-0.44	-1.36	-3.1	-3.72	-1.38	-2.51	-1.11	-0.78	-1	-1.57
GENE1572X	287	" ANK2 -  Ankyrin 2, neuronal"	1	-0.26	-0.2	0.61	-0.11	-0.03	0.08	0.2	0.35	0.14	0.58	0.49	-0.45	0.3	0.68	0.65	0.15	0.14	-0.1	0.15	-0.06	-0.28	0.18	-0.72	-1.41	-0.05	-0.38	-0.84	-1.68	-2.1	-0.66	-1.56	-0.48	-0.72	-0.55	-0.35
GENE195X	5671	 PSG3 -  pregnancy specific beta-1-glycoprotein 3	1	-0.61	0.25	0.4	-0.18	0.14	0.98	0.89	0.16	0.57	0.99	1.21	-0.24	0.13	1.14	0.32	-0.72	0.42	-0.4	0.35	-0.03	-0.17	-0.16	-0.44	-2.17	-0.08	-0.41	-1.38	-1.99	-3.56	-0.42	-1.98	-0.94	-0.63	-0.44	-0.74
GENE1243X	5792	" PTPRF -  Protein tyrosine phosphatase, receptor type, F"	1	0	0.27	0.28	-0.41	-0.13	0.24	0.44	-0.2	0.15	0.16	0.8	-0.46	-0.31	0.39	-0.67	-0.56	-0.45	-0.72		0.61	-0.21	-0.39	-1.63	-1.76	-0.22	-0.62	-1.42	-2.47	-3.36	-1.15	-1.72	-0.9	-0.72	-0.8	-1.35
GENE1618X	51082	 LOC100287414 -  Hypothetical protein LOC100287414	1	-0.42	-0.15	0.23	0.2	0.1	0.23	0.4	-0.24	-0.06	0.07	0.13	-0.49	-0.06	-0.1	-0.63	-0.28	0.01	-0.26	0.12	0.14	-0.25	-0.02	-0.99	-1.79	-0.09	-0.47	-0.83	-2.01	-2.87	-1.04	-1.09	-0.96	-0.87	-0.28	-0.74
GENE60X	136647	 C7orf11 -  chromosome 7 open reading frame 11	1	0.31	-0.01	-0.55	0	0.23	1.15	0.51	0.05	-0.03	0.07	0.33	0.89	0.25	-0.52	-0.28	-0.01	-0.2	-1.62	0.38	-1.59	0.57	0.63		-1.96	-0.25	-0.48	-0.91	-2.49	-3.75	-1.42	-2.16	-0.03	-1.21	-0.3	-1.91
GENE1161X	23500	 DAAM2 -  Dishevelled associated activator of morphogenesis 2	1	-0.2	0.5	0.09	-0.44	0.06	0.28	0.17	0.5	0.31	1.03	0.98	0.41	0.26	-0.05	-0.75	-0.02	-0.54	-2.09	0.23	-1.45	0.94	0.29	-3.29	-3.85	-0.12	-0.85	-1.48	-3.23	-4.38	-1.64	-2.5	0.03	-1.1	0.06	-1.62
GENE1042X	56256	 SERTAD4 -  SERTA domain containing 4	1	0.8	0.76	-0.35	-0.87	-0.35	-0.39	0.06	-0.66	0.17	-0.5	-0.04	-0.32	-0.65	0.33	-1.04	-0.69	-0.91	-0.97	0.85	-0.26	0.19	-0.77	-4.74	-3.69	0.05	-1.21	-1.62	-2.73	-4.46	-2.42	-3.58	0.41	0.06	-0.82	-2.33
GENE1772X	1382	 CRABP2 -  Cellular retinoic acid binding protein 2	1	-0.14	0.04	0.01	-0.09	0.13	1.01	1.14	0.08	-0.23	0.28	0.84	0.41	0.44	0.97	-0.19	0.25	0.5	0.02	0.12	-0.32	0.21	0.05	-1.65	-2.02	0.29	-0.43	-0.42	-1.07	-1.93	-0.66	-1.81	-0.15	-0.19	-0.22	-0.85
GENE1370X	5308	 PITX2 -  Paired-like homeodomain 2	1	-0.07	1.04	0.04	-0.66	-0.34	-0.08	-0.14	-0.08	0	0.67	0.55	-0.14	-0.21	0.8	0.17	0.32	-0.25	0.32	-0.14	-0.09	0.12	0.11	-2.83	-2.62	-0.02	-0.86	-0.36	-2.58	-3	-0.63	-1.67	0.16	-0.92	-0.35	-1.63
GENE1779X	332	 BIRC5 -  Baculoviral IAP repeat-containing 5	1	0.45	0.02	-0.2	-0.41	0.12	0.06	0.35	0.18	-0.21	-0.21	0.94	0.8	0.01	0.34	-0.18	-0.22	-0.78	-0.43	0.11	-0.03	0.02	-0.11	-1.98	-2.25	0.19	-0.36	-0.67	-1.97	-2.59	-0.62	-1.59	0.2	-0.27	0.02	-1.08
GENE1738X	6387	 CXCL12 -  Chemokine (C-X-C motif) ligand 12 (stromal cell-derived factor 1)	1	-0.14	-0.32	0.5	-0.12	0.09	-0.06	0.26	0.02	0.04	-0.2	-0.04	-0.67	-0.08	0.19	-0.43	-0.46	-0.43	-0.57	0.36	-0.42	0.2	-0.14	-2.46	-2.93	-0.36	-0.23	-0.49	-1.97	-2.42	-0.77	-0.88	-0.43	-0.51	-0.55	-1.02
GENE1801X	1062	" CENPE -  Centromere protein E, 312kDa"	1	-0.13	-0.03	0.33	-0.21	0.06	-0.09	0	0.11	-0.05	0.03	0.35	0.26	0.38	0.01	-0.15	-0.11	-0.1	0.17	0.31	-0.02	-0.03	-0.21	-2.04	-1.85	-0.49	-1.02	-1.15	-1.97	-1.7	-0.7	-1.05	-0.25	-0.49	-0.88	-1.36
GENE1711X	890	 CCNA2 -  Cyclin A2	1	-0.3	-0.08	0.56	-0.16	-0.02	0.41	0.09	0.07	0.01	-0.19	0.04	0.08	0.07	0.23	-0.27	-0.54	-0.26	0.23	0.16	0.08	-0.17	-0.07	-2.58	-2.49	-0.44	-0.68	-1.11	-2.68	-2.5	-0.63	-1.35	-0.16	-0.27	-0.7	-1.44
GENE1655X	83461	 CDCA3 -  Cell division cycle associated 3	1	-0.44	-0.02	0.64	-0.11	-0.07	0.38	0.23	0.27	-0.15	0.29	0.75	0.36	-0.11	0.61	0.08	-0.44	-0.86	-0.28	-0.18	-0.14	0.11	0.21	-1.59	-1.75	0.01	0.02	-0.4	-1.59	-1.91	-0.85	-1.25	-0.11	0	-0.39	-1.52
GENE1720X	3815	 KIT -  V-kit Hardy-Zuckerman 4 feline sarcoma viral oncogene homolog	1	-0.29	0.13	0.07	-0.1	0.2	0.73	0.87	0.29	0.23	0.36	0.42	0.15	0.16	0.74	0.27	-0.13	0.01	-0.02	0.06	-0.36	0.16	0.14	-1.68	-1.88	0.13	-0.52	-0.96	-1.95	-1.84	-1.45	-1.67	0.08	-0.03	-0.95	-1.4
GENE575X	2619	 GAS1 -  Growth arrest-specific 1	1	-0.15	0	0.19	-0.05	0.01	0.25	0.78	0.81	-0.03	0.5	0.47	0.02	0.08	0.66	0.2	-0.4	0.04	-0.23	0.11	-0.75	0.26	0.39	-4.47	-4.24	0.36	-0.32	-1.13	-3.62	-5.23	-2.95	-1.37	-0.5	-0.08	-0.44	-2.35
GENE1856X	4085	 MAD2L1 -  MAD2 mitotic arrest deficient-like 1 (yeast)	1	-0.23	0.13	-0.17	0.16	0.11	0.27	0.48	0.38	0.22	0.27	0.33	0.38	-0.04	0.28	0.14	-0.25	-0.06	0.36	-0.08	-0.3	0.3	0.09	-1.99	-1.85	0.21	-0.26	-0.74	-1.5	-2.32	-1.11	-1.73	-0.29	-0.01	-0.22	-0.84
GENE1487X	9672	 SDC3 -  Syndecan 3	1	0.1	-0.01	0.37	-0.41	-0.05	0.37	0.15	0.23	-0.14	-0.12	0.33	0.17	0.01	0.62	0.16	-0.38	-0.2	0.29	0.05	-0.37	-0.03	0.35	-1.77	-2.02	-0.08	-0.11	-0.58	-1.93	-1.77	-0.48	-1.32	-0.28	-0.26	-0.46	-0.72
GENE215X	389136	 VGLL3 -  Transcribed locus	1	-0.63	-0.02	1.14	-0.49	0	1.07	0.19	0.02	0.31	0.65	0.47	0.07	-0.37	1.16	0.31	-0.54	-0.24	0.26	0.51	-0.44	-0.3	0.24	-3.35	-4.13	-0.16	-0.07	-0.56	-3.14	-5.07	-0.72	-1.35	-0.28	0.19	-0.28	-1.44
GENE1118X	55872	 PBK -  PDZ binding kinase	1	-0.39	-0.08	1.06	-0.55	-0.24	1.1	0.61	0.22	0.13	0.41	0.54	-0.25	0.41	1.31	0.71	-0.1	0.12	0.82	0.28	-0.54	-0.07	0.06	-1.83	-3.26	-0.35	-0.28	-0.6	-2.03	-3.71	-0.78	-1.41	0.14	-0.09	-0.74	-1.7
GENE919X	9787	" DLGAP5 -  Discs, large (Drosophila) homolog-associated protein 5"	1	-0.39	0.06	1.2	-0.41	-0.47	0.76	0.76	-0.02	-0.26	0.78	0.4	-0.19	0.31	1.3	0.1	-0.53	0.48	0.05	0.08	-0.37	0.03	0.24	-2.02	-3.21	0.05	-0.19	-0.89	-2.68	-3.78	-0.76	-2.1	0.46	0.12	-0.64	-2.19
GENE633X	8200	 GDF5 -  Growth differentiation factor 5	1	0.17	-0.1	0.84	-0.73	-0.17	0.01	1.11	0.59	-0.54	0.12	-0.37	-0.59	-0.4	0.98	1.77	-0.67	-0.67	0.67	-0.39	-0.79	0.44	0.73	-3.56	-4.54	-0.1	0.37	-1.54	-3.55	-4.77	-2.15	-3.79	0.22	-0.05	-0.85	-3.46
GENE1729X	25992	" SNED1 -  Sushi, nidogen and EGF-like domains 1"	1	-0.07	-0.12	0.6	-0.21	-0.2	0.34	0.38	0	-0.17	-0.18	-0.64	-0.72	0.07	0.87	0.53	-0.56	0.23	0.03	-0.23	-0.83	0.1	0.96	-1.66	-2.4	-0.2	-0.35	-0.85	-1.92	-3.07	-1.08	-1.75	-0.33	-0.37	-0.54	-1.13
GENE882X	1759	 DNM1 -  Dynamin 1	1	-0.04	-0.19	0.21	-0.3	0.31	0.21	-0.07	0.11	0.08	-0.27	0.13	-0.16	-0.15	-0.02	0.03	-0.06	-0.35	-0.36	0.11	-0.05	-0.16	0.1	-1.8	-3.02	0	-0.37	-0.85	-1.54	-2.46	-0.69	-2.65	-0.36	-0.06	-0.49	-1.23
GENE1769X	3590	" IL11RA -  Interleukin 11 receptor, alpha"	1	-0.26	0.15	-0.01	-0.04	0.21	-0.3	-0.31	0.15	-0.1	-0.2	-0.11	-0.25	-0.07	0.15	0.26	-0.12	0.12	-0.69	0.17	0.06	-0.04	-0.17	-2.07	-2.2	0.15	-0.36	-0.62	-1.58	-2.32	-0.79	-1.4	-0.46	-0.68	-0.41	-0.74
GENE1725X	2621	 GAS6 -  growth arrest-specific 6	1	0.27	0.12	-0.21	0	-0.2	-0.28	-0.17	0.04	-0.19	-0.07	0.15	0.01	-0.29	-0.23	0.1	0.09	-0.05	-0.37			0.04	-0.04	-1.69	-2.48	0.24	-0.35	-0.4	-1.54	-2.09	-1.29	-1.22	-0.69	-0.48	-0.33	-0.64
GENE1134X	1033	 CDKN3 -  Cyclin-dependent kinase inhibitor 3	1	-0.01	0.09	0.02	0.17	-0.26	-0.89	-0.42	-0.07	-0.17	-0.26	0.52	0.73	-0.26	-0.49	-0.15	-0.53	-0.33	-0.35	0.05	-0.4	0.3	0.05	-2.95	-2.88	0.1	-0.37	-0.88	-2.34	-3.11	-1.68	-2.82	-0.23	-0.3	-0.65	-1.35
GENE396X	5493	 PPL -  Periplakin	1	0.31	-0.16	0.41	-0.42	-0.12	0.18	1.53	0.08	-0.02	0.05	0.67	0.91	-0.08	1.11	0.16	-0.52	-0.78	0.03	0.21	-0.53	0.03	0.3	-1.89	-3.22	0.11	-0.4	-0.92	-1.95	-3.39	-2.34	-2.72	0.16	-0.2	-0.85	-1.19
GENE1454X	7049	" TGFBR3 -  Transforming growth factor, beta receptor III"	1	-0.32	0.07	0.22	0.07	-0.04	0.76	0.91	0.55	0.26	0.39	0.51	0.17	0.1	-0.08	-0.01	-0.2	0.09	-0.58	0.07	-1.16	0.66	0.42	-2.67	-2.26	0.36	-0.29	-0.78	-2.26	-3.69	-1.18	-2.19	0.53	0.54	-0.15	-0.48
GENE1366X	3832	 KIF11 -  Kinesin family member 11	1	-0.19	0.28	0.23	-0.15	-0.17	0.52	1.09	0.08	0.32	0.26	1.06	-0.13	0.12	0.28	0.02	-0.63	0.87	-0.57	-0.45	-1.25	0.81	0.89	-2.37	-2.09	0.22	-0.79	-1.63	-3.63	-3.36	-1.41	-2.27	0.37	0.08	-0.41	-1.06
GENE623X	126	" ADH1C -  alcohol dehydrogenase 1C (class I), gamma polypeptide"	1	-0.14	-0.12	0.81	-0.51	-0.04	-0.02	0.44	0.09	-0.32	-0.21	0.63	-0.45	-0.18	0.61	0.35	-0.08		0.24	0.31	-1.4	0.68	0.42	-2.95	-3.37	0.33	-0.67	-1.57	-2.48	-2.12	-2.54	-2.93	0.16	-0.07	-0.87	-2.17
GENE1742X	9493	 KIF23 -  Kinesin family member 23	1	-0.17	0.11	0.28	-0.07	-0.14	0.26	0.11	0.2	-0.19	-0.09	-0.28	-0.69	-0.43	-0.19	0.06	-0.47	-0.05	-0.82	0.23	-0.26	-0.16	0.05	-2.91	-3.03	-0.06	-0.14	-0.61	-2.25	-1.92	-0.82	-1.96	0.14	-0.17	-0.65	-2.35
GENE1628X	9133	 CCNB2 -  Cyclin B2	1	-0.34	-0.06	0.34	-0.01	0.08	-0.23	-0.25	-0.1	-0.22	-0.28	-0.22	-0.62	0.12	-0.04	-0.41	-0.54	-0.3	-0.3	0.27	-0.06	-0.18	-0.02	-1.15	-2	-0.05	-0.47	-0.69	-1.79	-2.2	-0.79	-1.56	0.46	-0.39	-0.46	-1.21
GENE1469X	9655	 SOCS5 -  Suppressor of cytokine signaling 5	1	-0.12	-0.21	0.22	-0.05	0.16	0.02	0.35	-0.18	-0.06	-0.21	-0.31	-0.54	0.32	0.17	-0.27	-0.31	0.2	0.1	0.27	-0.2	-0.12	0.05	-1.68	-1.28	0.39	-0.19	-0.48	-1.89	-2.47	-0.55	-0.94	0.2	-0.11	-0.44	-0.69
GENE978X	9697	 TRAM2 -  Translocation associated membrane protein 2	1	-0.43	-0.02	0.25	0.34	-0.03	0.03	-0.01	0.07	-0.53	-0.01	0.17	-0.58	0.03	0.47	-0.4	-0.4	-0.1	-0.1	-0.01	0.27	-0.1	-0.16	-2.19	-1.5	-0.22	-0.22	-0.47	-2.31	-3.08	-1.1	-1.4	-0.75	-0.07	-0.25	-0.68
GENE697X	1281	" COL3A1 -  Collagen, type III, alpha 1"	1	0.57	0.31	-0.29	-0.36	-0.22	0.3	0.1	0.13	0.24	0.08	-0.16	-0.43	-0.24	0.2	0.43	-0.21	0.38	0.24	0.09	-0.39	0.4	-0.1	-1.74	-2.53	-0.28	-0.58	-1.1	-2.31	-4.5	-0.36	-0.71	-0.32	-0.34	-0.01	-0.59
GENE59X	4884	 NPTX1 -  Neuronal pentraxin I	1	0.15	0.44	-0.23		-0.37	0.49	0.44	-0.04	-0.21	0.09	0.2	-0.51	0.87	1.32	-0.18	-0.84	-0.08	-0.76	-0.35		-0.13	0.49		-4.07	-0.35	-0.1	-0.76	-2.67	-3.76	-0.79	-1.86	-0.3	-0.3	-0.76	-0.66
GENE1106X	1291	" COL6A1 -  Collagen, type VI, alpha 1"	1	0.2	0.32	-0.09	-0.32	-0.12	0.35	0.43	-0.04	-0.01	0.14	0.15	-0.31	0.37	0.7	-0.15	0	0.32	0.24	-0.53	0.08	0.18	0.26	-0.83	-3.06	-0.05	-0.45	-0.79	-2.01	-3.77	-0.69	-1.04	-0.81	-0.33	-0.71	-0.93
GENE58X	3671	 ISLR -  immunoglobulin superfamily containing leucine-rich repeat	1	0.16	-0.02	0.69	-0.7	-0.14	0.4	0.83	0.33	-0.17	0.41	-0.02	-0.29	0.72	1.6	1.58	-0.27	-0.27	0.95	-0.66	-0.42	0.22	0.86	-0.79	-3.37	0.06	-0.01	-0.42	-1.75	-4.04	-0.02		-0.16	-0.26	-0.62	-0.31
GENE1019X	284119	 PTRF -  Polymerase I and transcript release factor	1	-0.02	0.23	0.12	-0.26	-0.09	0.49	0.39	0.14	-0.05	0.4	0.23	-0.25	0.08	0.59	0.29	-0.44	0.31	0.06	-0.75	-0.57	0.39	0.93	-0.86	-2.02	0.24	0.46	0.14	-1.53	-2.99	0.5	-0.62	0.12	0.31	0.18	0.53
GENE339X	2149	 F2R -  Coagulation factor II (thrombin) receptor	1	-0.05	0.54	-0.03	-0.05	-0.41	0.63	0.98	0.29	-0.14	0.69	0.65	-0.07	0	0.36	-0.11	-0.56	0.63	0.09	-0.42	-0.13	0.42	0.12	-1.25	-2.25	0.45	0.06	-0.63	-1.74	-3.65	-0.51	-2.22	0.53	0.53	0.87	0.62
GENE507X	4016	 LOXL1 -  Lysyl oxidase-like 1	1	0.79	0.42	0.06	-0.53	-0.76	-0.18	-0.1	0.34	-0.15	-0.01	0.77	-1.06	0.05	-0.03	-0.13	-1.08	1.29	-0.24	-0.26	-0.54	0.64	0.17	-2.29	-3.76	0.26	-0.02	-0.96	-2.84	-4.59	-1.16	-1.91	-0.07	-0.1	-0.06	-0.21
GENE57X	8434	 RECK -  Reversion-inducing-cysteine-rich protein with kazal motifs	1	0.36	0.56	-0.22	-0.34	-0.37	-0.07	0.65	0.32	-0.49	-0.21		-0.12	0.04	0.8	-0.02	-1.01	0.21	0.08	-0.72	-0.95	1.11	0.56	-2.7	-3.04	0.93	0.01	-1.55	-3.28	-4.05	-0.78	-1.34	0.88	0.48	0.31	0.01
GENE1632X	1031	" CDKN2C -  Cyclin-dependent kinase inhibitor 2C (p18, inhibits CDK4)"	1	-0.22	0.07	-0.07	0.1	0.12	0.11	0.28	0.06	0.49	0.42	0.36	-0.24	0.36	0.6	0.1	-0.07	0.16	0.22	-0.91	0.39	0.24	0.27	-1.56	-1.98	0.42	0.14	-0.55	-2.15	-2.83	-0.11	-1.3	0.59	0.29	-0.14	-0.57
GENE1089X	4605	 MYBL2 -  V-myb myeloblastosis viral oncogene homolog (avian)-like 2	1	0.16	0.35	0.27	-0.64	-0.16	-0.09	0.14	0.17	0.01	0.2	0.59	-0.15	-0.06	0.36	-0.21	-0.48	-0.39	-0.27	-0.9	0.32	0.3	0.28	-0.99	-2.02	0.34	0.22	0.08	-1.77	-2.28	-0.85	-0.83	0.23	0.17	-0.02	0.13
GENE965X	30846	 EHD2  -  EH-domain containing 2	1	1.6	-0.19	0.17	-0.77	-0.8	0.17	0.14	0.24	-0.71	-0.32	0.03	-0.76	-0.81	-0.01	-0.21	-0.81	-0.49	-0.58	-0.39	-0.76	0.36	0.8	-2.24	-2.93	-0.23	-0.51	-1.07	-2.56	-3.85	-0.91	-2.72	-0.28	-0.13	-0.84	-0.81
GENE206X	23452	 ANGPTL2 -  angiopoietin-like 2	1	0.74	0.19	0.5	-1.03	-0.42	0.5	0.58	0.32	-0.56	0.19	1.47	-0.82	-0.16	1	1.43	-1.02	-0.35	0.91	-0.04	-0.49	0.07	0.47	-4	-2.99	-0.12	0.69	-0.8	-3.33	-3.88	-0.54	-1.9	0.08	0.06	-0.87	-0.61
GENE1094X	1760	 DMPK -  Dystrophia myotonica-protein kinase	1	0.06	0.25	-0.2	-0.27	0.17	-0.12	-0.07	-0.3	-0.18	-0.21	0.34	-0.02	-0.29	-0.04	-0.08	-0.47	-0.37	-0.7	-0.07	-0.06	-0.07	0.21	-1.4	-0.99	0.79	-0.1	-0.69	-1.69	-2.96	-1.1	-1.89	0.22	-0.23	-0.28	-1.53
GENE646X	113457	" TUBA3D -  Tubulin, alpha 3d"	1	-0.12	0.28	0.08	-0.04	-0.19	-0.19	-0.03	-0.17	0.15	-0.16	0.12	0.16	0.42	0.09	-0.01	-0.18	0.38	-2.1	0.24	-1.25	0.55	0.47	-1.52	-2.38	0.36	-0.09	-0.71	-2.88	-3.61	-1.47	-3.04	0.35	0.08	0.17	-2.42
GENE230X	2199	 FBLN2 -  Fibulin 2	1	-0.13	0.43	0.21	-0.51	-0.01	0.39	0.73	-0.23	-0.19	0.25	0.51	-0.64	0.11	-0.09	-1.01	-0.6	-0.31	-0.32	0.1	-0.75	0.02	0.62	-1.16	-2.78	-0.62	-1.17	-1.42	-1.59	-3.75	-1.21	-1.54	-0.77	-0.69	-1.14	-0.78
GENE831X	3912	" LAMB1 -  laminin, beta 1"	1	-0.15	0.14	0.39	-0.1	-0.29	-0.16	0.5	-0.36	0.8	-0.17	0.21	-1.03	-0.04	0.24	-0.78	-0.67	0.14	-0.43	0.01	0.05	-0.03	-0.04	-0.7	-1.79	-0.35	-0.36	-0.89	-1.58	-2.42	-0.8	-0.87	-0.41	-0.66	-0.57	0.04
GENE1255X	3487	 IGFBP4 -  Insulin-like growth factor binding protein 4	1	-0.56	0.54	-0.09	-0.09	0.21	0.2	-0.14	-0.25	0.7	0.02	0.35	-0.25	0.08	-0.16	-1.12	-0.72	0.31	-0.57	0.05	0.09	-0.74	0.6	-0.63	-1.96	-0.46	-0.56	-1	-2.23	-2.52	-0.88	-1	-0.81	-0.88	-0.74	-0.5
GENE682X	1009	" CDH11 -  Cadherin 11, type 2, OB-cadherin (osteoblast)"	1	-0.46	0.1	0.34	-0.01	0.04	-0.18	0.09	-1.13	-0.01	0	0.48	-0.14	0.05	0.65	-0.29	-0.45	0.13	-0.2	-0.03	-0.52	-0.08	0.63	-1.15	-2.26	-0.01	-0.33	-1.25	-3.11	-3.06	-1.25	-0.9	-1.14	-0.7	-0.34	-0.8
GENE1699X	90993	 CREB3L1 -  CAMP responsive element binding protein 3-like 1	1	-0.25	0.13	0.06	-0.09	0.16	0.23	0.44	-0.28	0.41	0.03	0.44	0.04	0.05	0.09	-0.57	-0.63	-0.03	-0.88	0.44	0.08	-0.18	-0.12	-1.54	-1.53	-0.22	-0.33	-0.69	-1.92	-1.62	-0.33	-0.63	-0.62	-0.55	-0.31	-0.78
GENE1363X	10160	" FARP1 -  FERM, RhoGEF (ARHGEF) and pleckstrin domain protein 1 (chondrocyte-derived)"	1	-0.14	-0.18	0.38	0.06	-0.12	0.34	0.09	-0.24	-0.12	0.17	0.06	-0.19	-0.01	-0.05	-0.18	0.07	0.33	-0.5	-0.08	0.5	-0.25	-0.17	-1.17	-1.68	-0.49	-0.44	-0.35	-1.85	-1.2	-1.21	-1.51	-0.55	-0.77	-0.51	-1.15
GENE1244X	57082	 CASC5 -  cancer susceptibility candidate 5	1	-0.85	-0.25	0.62	-0.08	0.19	0.26	0.17	0.08	0.17	0.42	0.22	-0.14	0.18	0.11	-0.15	-0.02	0.55	0.13	0.02	-0.48	-0.13	0.55	-1.9	-1.84	-0.44	-0.81	-0.67	-2.3	-1.53	-1.34	-0.99	-0.06	-0.32	-0.56	-1.21
GENE850X	23051	 ZHX3 -  Zinc fingers and homeoboxes 3	1	-1.63	-0.25	0.53	0.08	1.26	0.12	0.42	-0.01	0.54	-0.01	0.71	0.18	0.48	0.43	-0.54	-1.02	-0.05	-1.04	0.16	-0.19	-0.13	0.15	-2.23	-2.57	-0.42	-1.67	-0.96	-3.25	-2.02	-1.99	-1.63	-0.07	-0.74	-1.5	
GENE1730X	9260	 PDLIM7 -  PDZ and LIM domain 7 (enigma)	1	-0.33	-0.21	0.03	0	0.51	0.25	0.17	0.38	0.16	0.12	-0.36	-0.27	-0.25	-0.3	-0.86	-0.4	0.15	-0.93	-0.07	0.04	-0.31	0.34	-1.83	-1.31	-0.94	-1.44	-0.62	-2.93	-2.28	-1.91	-0.93	-0.21	-0.57	-1.41	-1.52
GENE1399X	9934	" P2RY14 -  Purinergic receptor P2Y, G-protein coupled, 14"	1	-0.86	-0.03	0.5	-0.59	0.96	0.72	0.56	0.35	0.5	0.52	0.65	0.31	0.25	0.37	-0.58	-0.17	0.26	-0.56	0.2	-0.23	-0.34	0.37	-1.08	-0.75	-1.18	-1.71	-0.73	-2.71	-2.52	-1.83	-0.94	-0.75	-0.52	-1.3	-1.58
GENE1765X	56967	 C14orf132 -  Chromosome 14 open reading frame 132	1	-0.28	-0.12	0.46	-0.26	0.19	0.36	0.42	0.28	-0.2	0.25	0.33	-0.37	-0.07	-0.18	-0.43	-0.36	-0.24	-0.24	0.34	-0.23	0.1	-0.2	-1.33	-1	-0.58	-1.02	-1.27	-1.73	-1.6	-0.82	-1.22	-0.64	-0.38	-0.94	-1.73
GENE1195X	4641	 MYO1C -  Myosin IC	1	-0.46	-0.7	0.23	0.53	0.39	0.28	0.47	0.02	0.11	0.37	0.08	-0.12	0.35	0.33	-0.91	0.14	-0.12	-0.97	-0.58	0.35	0.16	0.06	-1.42	-1.49	-0.36	-1.14	-0.85	-2.09	-2.21	-0.07	-1.54	-1.09	-0.68	-0.73	-1.47
GENE1545X	3728	 JUP -  Junction plakoglobin	1	-0.31	-0.32	0.35	-0.01	0.29	-0.68	-0.45	0.31	-0.18	0.27	0.14	-0.73	0.23	0.5	-0.21	0.23	0.24	-0.49	-0.34	0.08	0.03	0.23	-1.04	-1.61	-0.32	-0.36	-0.64	-1.88	-1.7	-1.33	-1.29	-0.22	-0.28	-0.87	-0.96
GENE1579X	10592	 SMC2 -  Structural maintenance of chromosomes 2	1	-0.02	-0.02	0	0.06	-0.03	-0.52	0.01	-0.36	-0.35	-0.33	-0.59	-1.1	0.18	0.05	-0.07	-0.14	-0.06	-0.15	0.05	0.47	0.37	-0.89	-1.91	-1.73	-0.36	-0.68	-0.81	-2.23	-2.07	-0.8	-1.4	-0.38	-0.8	-0.38	-0.96
GENE1214X	38	 ACAT1 -  Acetyl-Coenzyme A acetyltransferase 1	1	-0.34	-0.79	-0.04	0.45	0.73	-0.74	-0.6	0.19	0.27	0.03	-0.28	-0.35	0.36	0.47	-0.67	-0.58	-0.49	-0.33		0.31	0.44	-0.74	-2.25	-1.13	-0.55	-1.1	-0.97	-1.8	-2.34	-1.47	-2.17	-1.02	-0.9	-1.25	-1.71
GENE1488X	8270	" LAGE3 -  L antigen family, member 3"	1	-0.25	-0.22	-0.41	0.55	0.34	-0.38	-0.1		-0.05	0.05	-0.34	-0.57	0.02	-0.28	-0.96	-0.54	-0.49	-0.59	0.7	0.58	-0.41	-0.88	-2.4	-1.29	-0.34	-1.11	-1.69	-2.35	-3.19	-1.79	-1.81	-1.56	-1.48	-0.93	-1.21
GENE759X	1073	 CFL2 -  Cofilin 2 (muscle)	1	-0.08	0.13	-0.23	-0.15	0.33	-0.92	0.08	0.35	0.54	0.03	-0.29	-1.06	0.14	-0.05	-0.49	0.14	0.29	-0.48		0.37	-0.06	-0.3	-2.46	-1.34	-0.02	-0.67	-1.91	-2.76	-4.25	-2.17	-2.53	-0.85	-1.14	-0.66	-1.5
GENE1582X	3257	 HPS1 -  Hermansky-Pudlak syndrome 1	1	-0.22	-0.31	-0.51	0.53	0.49	-0.2	-0.54	0.43	0.02	0.38	-0.53	-1.82	-0.26	0.37	-0.86	0.14	-0.22	-0.61		-0.05	0.12	-0.08	-1.67	-1.57	0.01	-0.94	-1.37	-2.63	-2.53	-1.46	-2.1	-1.77	-0.93	-0.69	-1.58
GENE465X	152007	 GLIPR2 -  GLI pathogenesis-related 2	1	-0.06	-1.06	-0.26	0.87	0.5	-0.16	-0.88	0.35	0.53	0.45	-0.48	-1.46	-0.25	-0.81	-0.6	-0.36	-0.31	-1.31	0.18	-0.25	0.38	-0.3	-3.34	-2.41	-0.55	-1.13	-1.53	-2.74	-2.89	-1.41	-2.19	-1.82	-0.87	-1.35	-2.35
GENE1397X	7533	" YWHAH -  Tyrosine 3-monooxygenase/tryptophan 5-monooxygenase activation protein, eta polypeptide"	1	0.09	-0.19	-0.25	0.07	0.28	-0.11	0.37	0.07	0.17	0.03	0.22	-0.24	0.03	0.05	-0.32	-0.25	0.13	-0.8	0.4	0.38	-0.22	-0.55	-2.07	-1.47	-0.4	-0.54	-1.26	-1.51	-2.04	-0.81	-1.04	-1.11	-1.14	-0.81	-1.89
GENE1808X	284749	 LOC284749 -  Hypothetical LOC284749	1	-0.25	-0.07	-0.18	0.15	0.34	0.09	0.21	0.09	0.07	0.06	0.36	0.11	0.17	0.13	-0.57	-0.29	-0.12	-0.12	0.54	0.02	-0.06	-0.49	-2.22	-1.89	-0.38	-1	-1.44	-1.52	-1.83	-1.13	-1.08	-1.25	-1.38	-1.21	-1.39
GENE958X	169611	 OLFML2A -  Olfactomedin-like 2A	1	-0.44	-0.16	0.1	-0.07	0.56	-0.41	-0.24	0.24	-0.04	0.16	0.09	-0.52	0.03	-0.19	-0.93	-0.22	-0.32	-0.73	-0.06	0.81	-0.3	-0.44	-1.08	-2.11	-0.08	-0.89	-0.95	-2.87	-3.03	-0.83	-1.48	-1.62	-1.48	-1.24	-1.19
GENE1438X	8504	 PEX3 -  Peroxisomal biogenesis factor 3	1	-0.31	-0.12	0.05	-0.18	0.56	-0.96	-0.56	0.09	0.39	-0.27	-0.38	-0.8	0.17	-0.23	-0.66	-0.68	0.06	-0.93	0.16	0.41	-0.26	-0.31	-1.41	-1.43	-0.89	-1.02	-1.13	-2.29	-2.69	-0.9	-1.11	-0.79	-1.26	-0.91	
GENE1262X	6925	 TCF4 -  transcription factor 4	1	-0.5	-0.05	0.16	0.09	0.37	-0.94	-0.64	0.26	0.14	0.07	-0.22	-1.28	0.31	-0.23	-0.43	-0.29	0.05	-0.38	-0.11	0.78	-0.29	-0.38	-1.52	-1.45	-0.46	-0.8	-0.98	-2.16	-2.1	-0.74	-0.15	-0.64	-0.81	-0.99	-0.55
GENE62X	2550	" GABBR1 -  Gamma-aminobutyric acid (GABA) B receptor, 1"	1	-0.49	-0.25	0.3	0.14	0.3	-0.03	-0.96	0.24	-0.1	0.04	-0.44	-1.57	0.33	0.22	-0.41	-0.03	0.24	-0.44	-0.23	0.9	-0.27	-0.4	-2.06		-0.13	-0.63	-0.95	-2.91		-0.87	-1.39	-0.97	-0.95	-0.89	-1.86
GENE1774X	57496	 MKL2 -  MKL/myocardin-like 2	1	-0.24	-0.48	0.2	0.13	0.38	-0.22	-0.03	0.15	-0.06	0.07	-0.68	-0.88	0.49	0.37	-0.08	0.21	-0.04	-0.34	0.08	0.42	-0.47	-0.02	-1.07	-1.49	-1.1	-0.65	-0.85	-2.18	-2.21	-1.43	-1.31	-0.62	-1.03	-1.19	-0.63
GENE991X	8907	" AP1M1 -  Adaptor-related protein complex 1, mu 1 subunit"	1	-0.39	-0.42	0.08	0.33	0.4	-0.09	0.21	-0.08	-0.03	-0.27	-0.29	0.19	0.43	0.09	0	0.24	0.3	-0.31	-0.26	0.72	-0.26	-0.21	-1.02	-1.39	-0.74	-0.55	-1.15	-2.83	-2.61	-0.48	-1.19	-0.84	-0.4	-0.89	-0.9
GENE1666X	535	" ATP6V0A1 -  ATPase, H+ transporting, lysosomal V0 subunit a1"	1	-0.44	-0.36	-0.15	0.18	0.75	0.34	0.16	0.47	0.08	0.23	-0.16	0	1.25	0.34	0.13	0.45	0.37	0.28	0.02	0.46	-0.31	-0.18	-0.52	-0.47	-0.12	-0.34	-0.22	-1.99	-2.22	-0.74	-0.6	-0.49	-0.37	-0.45	-0.2
GENE1078X	81	" ACTN4 -  Actinin, alpha 4"	1	0.23	-0.31	-0.34	0.13	0.3	-0.3	0.05	0.03	-0.2	-0.22	-0.68	-0.14	0.08	-0.24	-0.48	-0.26	0.13	-1.18	-0.19	0.18	-0.47	0.47	-1.88	-2.89	-0.95	-0.9	-0.68	-2.3	-3.05	-0.54	-1.64	-0.85	-1.14	-0.42	-0.7
GENE297X	340371	 NRBP2 -  Nuclear receptor binding protein 2	1	-0.36	0.26	-0.08	-0.23	0.41	-0.43	0	0	0.74	0.23	0.88	-0.64	0.37	0.62	0.33	0.28	0.32	-0.89	0.01	0.03	-0.26	0.22	-0.56	-1.34	0	-0.25	-0.82	-2.54	-4	-1.2	-1.73	0.01	0.09	-0.26	-0.81
GENE63X	8803	" SUCLA2 -  Succinate-CoA ligase, ADP-forming, beta subunit"	1	-0.17	-0.08	0.05	-0.12	0.26	0.21	0.27	0.09	0.27	0.04	-0.23	-0.14	0.66	0.66	0.47	0.24	0.48	-0.01	0.26		0.1	-0.35		-0.66	0.01	-0.12	-0.34	-1.62	-2.32	-1.07	-0.76	0.07	-0.09	-0.05	-0.31
GENE1663X	1819	 DRG2 -  Developmentally regulated GTP binding protein 2	1	-0.17	-0.04	-0.29	0.31	0.18	0.26	0.1	0.15	0.37	-0.1	0.03	-0.69	0.22	0.15	0.48	0.02	0.17	-0.31	0.01	0.28	-0.16	-0.14	0.16	-0.66	0	0.05	-0.73	-2.07	-2.21	-1.43	-1.49	-0.72	-0.42	-0.31	-0.69
GENE880X	84056	 KATNAL1 -  Katanin p60 subunit A-like 1	1	-0.23	-0.06	-0.03	0.33	0.15	-0.64	0.75	0.17	0.04	0.28	-0.07	-0.78	0.72	0.81	0.52	-0.05	0.34	0.35	0.08	-0.75	-0.08	0.37	-0.32	-1.19	0.08	-0.22	-0.75	-2.26	-2.25	-1.25	-1.77	-0.68	-0.3	-0.75	-1.2
GENE1425X	64223	" MLST8 -  MTOR associated protein, LST8 homolog (S. cerevisiae)"	1	0.08	0.13	-0.85	0.35	0.27	-0.71	-0.96	-0.07	0.01	-0.38	-1.06	-0.59	-0.2	-0.42	-0.23	-0.29	-0.25	-0.3	0.03		-0.14	0.1	-0.52	-0.61	-0.5	-0.59	-0.9	-2.23	-2.8	-1.77	-2.86	-1.14	-0.89	-0.68	-0.69
GENE1249X	10493	 VAT1 -  Vesicle amine transport protein 1 homolog (T. californica)	1	-0.46	-0.07	-0.02	0.42	0.13	-0.48	-0.99	0.54	0.29	0.37	-0.54	-0.65	0.46	0.41	-0.08	-0.12	0.06	-0.49	-0.02	-0.7	0.24	0.49	-1.33	-1.27	-0.1	-0.7	-0.98	-2.55	-2.93	-1.64	-3.12	-0.95	-0.56	-0.68	-0.97
GENE1437X	8228	 PNPLA4 -  Patatin-like phospholipase domain containing 4	1	-0.24	0	-0.47	0.7		-0.93	-0.45	0.16	-0.11	0.01	-0.71	-0.78	-0.37	0.11	0.1	-0.42	-0.28	-0.5	-0.07	-0.01	0.26	-0.19	-1.73	-0.97	0.4	-0.4	-0.88	-1.75	-2.87	-1.79	-1.81	-1.3	-0.65	-0.47	-0.8
GENE1347X	80230	 RUFY1 -  RUN and FYVE domain containing 1	1	-0.54		0.26	0.25	0.02	0.76	0.54	-0.24	-0.35	0.03	0.02	-0.9	0.04	0.36	0.14	-0.03	0.47	0.11	0.12	-0.1	-0.22	0.2	-1.62	-0.69	0.12	-0.08	-0.93	-1.96	-2.46	-0.71	-0.96	-0.47	-0.37	-0.41	-1.29
GENE1206X	6092	" ROBO2 -  Roundabout, axon guidance receptor, homolog 2 (Drosophila)"	1	-0.21	0.63	-0.35	-0.09	0.03	0.01	0.12	-0.06	-0.13	-0.12	0.02	-0.07	0.25	0.27	-0.3	-0.04	-0.18	-0.13	0.48	-1.15	0.1	0.57	-0.77	-1.67	0.42	-0.31	-0.96	-1.16	-2.37	-0.9	-1.54	-0.89	0.38	-0.25	-0.9
GENE1126X	4081	 MAB21L1 -  Mab-21-like 1 (C. elegans)	1	0.05	-0.01	-0.26	0.1	0.12	0.15	0.41	-0.03	-0.01	0.21	0.1	0.38	0.12	0.31	-0.21	-0.16	-0.12	-0.85	-0.33	-0.73	0.54	0.15	-0.59	-1.12	0.73	-0.56	-1.15	-1.72	-2.84	-1.04	-0.95	-0.21	0.03	-0.5	-1.06
GENE533X	396	 ARHGDIA -  Rho GDP dissociation inhibitor (GDI) alpha	1	-0.16	0.23	-0.88	0.39	0.42	1.06	0.83	0.99	0.48	0.76	0.41	0.93	0.46	0.34	0.35	0.18	0.52	-0.8	-0.76	0.03	0.23	0.5	-0.93	-1.4	0.06	-0.54	-0.7	-1.86	-3.51	-0.44	-1.22	-0.08	-0.22	-0.43	-0.46
GENE50X	1893	 ECM1 -  Extracellular matrix protein 1	1	0.38	0.47	-1.1		0.26	0.74	1.28	0.39	0.46	0.59	0.36	1.71	0.72	0.95	0.21	0.15	0.74	0.19	-1.46		0.7	0.77		-0.44	0.42	-0.35	-0.34	-2.03	-2.4	-0.76	-0.69	-0.01	0.02	-0.11	-0.39
GENE1789X	283373	 ANKRD52 -  Ankyrin repeat domain 52	1	0	-0.52	0.19	0.14	0.17	0.3	0.47	0.1	-0.04	-0.28	-0.45	-0.47	0.36	-0.06	-0.32	-0.22	-0.32	-1.14	0.05	0.26	-0.54	0.23	-1.27	-1.42	-1.03	-0.58	0.44	-2.34	-2.16	-1	-1	-0.56	-0.75	-0.26	-0.92
GENE1782X	4054	 LTBP3 -  Latent transforming growth factor beta binding protein 3	1	-0.3	-0.09	-0.12	0.21	0.31	0.1	0.29	-0.09	-0.04	0.22	0.33	0.39	0.2	0.03	-0.96	-0.35	-0.03	-0.57	-0.57	0.68	0.11	-0.22	-0.75	-0.72	-0.23	-0.28	-0.49	-2.19	-2.15	-0.82	-0.62	-0.1	-0.16	-0.84	-0.56
GENE367X	54865	 GPATCH4 -  G patch domain containing 4	1	-0.07	-0.21	0.29	0.42	-0.43	-0.05	0.04	-0.36	-0.77	-0.34	-0.29	-1.53	-0.31	-0.2	-0.07	-0.53	-0.22	-1.86	-0.27	0.98	-0.06	-0.64	-1.14	-1.76	-0.61	-0.63	-0.61	-2.49	-4.28	-1.21	-0.86	-0.07	-0.38	0.18	-0.95
GENE1225X	11067	 C10orf10 -  Chromosome 10 open reading frame 10	1	0.14	0.1	0.29	-0.41	-0.12	-0.18	0.25	-0.27	0.01	0.24	0.51	-0.08	0.21	0.37	0.07	-0.08	-0.04	-1.03	-0.19	0.62	-0.14	-0.28	-0.81	-0.29	-0.22	-0.7	-1.2	-1.77	-2.67	-0.98	-0.04	0.2	-0.26	-0.04	-0.74
GENE530X	10974	 C10orf116 -  Chromosome 10 open reading frame 116	1	0.3	0.2	1.05	-1.56	0	0.57	0.45	-0.06	0.93	0.81	0.91	0.18	0.23	0.5	-0.32	0.12	0.7	-1.36	0.2	0.71	-0.62	-0.29	-0.09	-1.69	-0.03	-0.83	-0.47	-2.23	-2.96	-1.25	-0.62	-0.29	-0.47	-0.17	-0.7
GENE521X	93099	 DMKN -  Dermokine	1	-0.23	-0.24	1.1	-0.56	-0.09	0.5	1.35	-0.36	0.84	0.54	1.27	-0.22	0.23	0.89	-0.47	-0.47	0.48	-1.31	-0.1	0.67	-0.08	-0.48	0.06	-1.12	-0.35	-0.27	0.02	-2.19	-2.5	-0.89	-0.42	-0.16	-0.49	-0.08	-0.68
GENE49X	5669	 PSG1 -  pregnancy specific beta-1-glycoprotein 1	1	0.32	-0.62	1.6	-0.42	-0.86	0.22		-0.47	-0.26	0.27	0.43	-0.15	0.25	0.37	-0.54	-0.25	1.13	-0.43	-0.12	0.65	-0.22	-0.31	-0.94	-1.51	0.17	-0.31	-0.1	-2.4	-2.91	-0.91	-0.99	0.02	-0.71	0.3	-1.06
GENE1448X	9022	 CLIC3 -  Chloride intracellular channel 3	1	0.5	-0.98	0.75	0.07	-0.35	-0.09	0.27	-0.4	-0.48	-0.06	0.06	-0.02	0	-0.25	-0.07	-0.1	0	-0.27	-0.04	0.64	0.06	-0.68	-1.28	-1.22	-0.51	-0.65	-0.5	-2.25	-2.54	-1.69	-0.67		-0.99	-0.12	-0.85
GENE417X	7298	 TYMS -  Thymidylate synthetase	1	0.42	-0.25	0.47	-0.37	-0.06	-0.14	1.1	-0.43	0.15	0.01	0.65	-0.38	-0.22	-0.1	-0.13	-0.11	-0.04	-0.6	0.03	0.71	-0.14	-0.59	-1.41	-2.13	-0.58	-0.67	-0.5	-2.5	-3.65	-1.24	-0.4	-0.08	-0.76	-0.21	-0.85
GENE740X	23164	 MPRIP -  Myosin phosphatase Rho interacting protein	1	-0.4	-0.39	0.45	0.16	0.17	0.06	0.56	0.06	0.15	0.3	0.67	0.38	0.8	0.65	-0.55	0.05	0.57	-0.19	-0.48	0.76	0.14	-0.43	-0.92	-1.59	-0.21	-0.2	0.38	-1.88	-2.88	-0.8	-0.86	-0.21	-0.38	0.28	-0.44
GENE503X	268	 AMH -  Anti-Mullerian hormone	1	-0.51	-0.51	0.5	0.05	0.45	-0.3	0.48	-0.35	0.24	-0.22	0.13	-0.6	0.69	0.15	-0.57	-0.36	0.14	-0.61	0.05	0.66	-0.11	-0.59	-1.51	-0.62	-0.68	-0.64	-0.03	-2.18	-2.13	-1.16	0.05	-0.14	-0.71	-0.3	-0.95
GENE549X	2018	 EMX2 -  Empty spiracles homeobox 2	1	-0.3	-0.67	0.49	0.16	0.3	-0.44	0.11	-0.29	0.02	-0.33	-0.23	-0.68	0.75	0.28	-0.42	-0.23	-0.08	-0.07	-0.04	0.48	0.1	-0.55	-1.67	-0.88	-0.44	-0.41	-0.04	-2.43	-2.82	-1.03	-0.01	-0.08	-0.45	-0.14	-0.88
GENE1109X	56951	 C5orf15  -  chromosome 5 open reading frame 15	1	-0.37	-0.36	0.22	0.01	0.48	0.14	0.54	0.13	0.3	-0.13	-0.19	-0.36	0.81	0.36	-0.25	0.28	0.09	-0.02	0.24	0.48	-0.02	-0.71	-0.86	-0.89	-0.42	-0.51	-0.14	-1.9	-2.45	0.13	1.01	0.04	-0.39	-0.01	-0.44
GENE1715X	81698	 C15orf5 -  chromosome 15 open reading frame 5	1	0.11	-0.14	-0.29	-0.17	0.5	0.06	-0.16	0.22	0.16	-0.24	0.6	0.49	-0.04	-0.16	-0.04	0.27	0.08	-0.61	-0.18	0.02	0.11	0.05	-0.8	-1.57	0.42	-0.41	-0.79	-2.56	-1.85	-0.57	-0.72	-0.41	-0.38	-0.73	-1.37
GENE834X	5980	" REV3L -  REV3-like, catalytic subunit of DNA polymerase zeta (yeast)"	1	-0.03	0.12	-0.11	0.24	-0.22	-0.75	-0.12	0.28	-0.47	-0.31	-0.25	0.12	-0.51	-0.43	-0.12	-0.21	-0.42	0.37	0.4	-0.14	0.21	-0.96	-3.17	-2.47	0.41	-0.88	-1.81	-2.91	-2.43	-0.77	-1.26	0.09	-0.41	-0.87	-0.95
GENE1520X	91624	 NEXN -  nexilin (F actin binding protein)	1	0.63	0.16	-0.74	-0.09	0.04	-0.31	0.06	0.38	0.41	0.01	-0.03	-0.38	-0.28	0.26	0.26	0.02	-0.1	0.41	-0.26	0.14	0.49	-0.36	-3	-2.7	0.09	-0.31	-0.86	-1.92	-1.14	0.25	0.35	0.32	0.28	-0.27	-0.8
GENE1067X	678	" ZFP36L2 -  Intersectin 1 long form mRNA, 3' UTR"	1	0.06	0.04	0.18	-0.43	0.16	-0.13	-0.41	-0.04	-0.09	0.3	-0.2	-0.93	-0.17	0.09	-0.47	-0.18	-0.15	-0.25	-0.02	-0.18	0.1	0.1	-2.84	-1.71	-0.01	-0.26	-0.54	-2.31	-1.11	-0.33	-0.66	-0.25	-0.09	-0.31	-0.69
GENE723X	678	" ZFP36L2 -  Zinc finger protein 36, C3H type-like 2"	1	0.06	0.04	0.18	-0.43	0.16	-0.13	-0.41	-0.04	-0.09	0.3	-0.2	-0.93	-0.17	0.09	-0.47	-0.18	-0.15	-0.25	-0.02	-0.18	0.1	0.1	-2.84	-1.71	-0.01	-0.26	-0.54	-2.31	-1.11	-0.33	-0.66	-0.25	-0.09	-0.31	-0.69
GENE466X	57574	 MARCH4 -  Membrane-associated ring finger (C3HC4) 4	1	-0.19	0.49		-0.38	0.09	0.43	-0.08	0.17	0.06	0.37	-0.06	0.04	0.09	0.86	0.17	0.05	0.38	0.05	0.07	-0.28	-0.12	0.33	-2.58	-2.42	0.16	-0.34	-1.27	-2.43	-0.98	0.44	-1	-0.33	-0.5	-0.48	-1.59
GENE1391X	54492	 NEURL1B -  Neuralized homolog 1B (Drosophila)	1	-0.16	0.26	0.64	-0.49	-0.23	0.93	0.43	0.48	0.2	0.56	-0.36	-0.11	-0.13	0.87	0.21	-0.42	-0.29	-0.11	-0.04	0.09	-0.47	0.41	-1.96	-2.4	-0.2	-0.17	-0.58	-1.44	-1.25	-0.14	-0.34	0.25	-0.17	-0.43	-1.47
GENE896X	4776	" NFATC4 -  Nuclear factor of activated T-cells, cytoplasmic, calcineurin-dependent 4"	1	0.53	-0.4	0.66	-0.31	-0.15	0.2	0.4	0.45	-0.25	0.05	0.2	-0.5	-0.46	0.18	0.01	-0.05	-0.29	-0.36	-0.22	-0.86	0.44	0.63	-1.89	-1.85	-0.15	-0.39	-0.93	-2.32	-2.9	0.52	-0.08	-0.11	-0.12	-0.79	-1.45
GENE64X	83475	 DOHH -  Deoxyhypusine hydroxylase/monooxygenase	1	0.1	-0.53	0.47	0.02	-0.04	-0.2	-0.35	0.3	-0.38	-0.26	-0.52	-0.36	-0.1	0.04	-0.34	0.11	-0.33	-0.14	-0.06	-1.19	0.44	0.8				-0.68	-0.89	-1.69	-2.98	0.06	-1.1	0.26	0.14	-0.42	-1.35
GENE800X	147968	 CAPN12 -  calpain 12	1	-0.09	-0.36	0.26	0.05	0.14	-0.48	-0.57	0.23	-0.36	-0.32	-0.94	-0.76	-0.1	0.09	-0.2	0.02	-0.34	-0.35	0.47	-1.43	0.33	0.62	-0.97	-1.61	0.25	-0.47	-0.43	-0.75	-2.29	-0.14	-0.41	0.34	0.24		-0.62
GENE1290X	4172	 MCM3 -  Minichromosome maintenance complex component 3	1	-0.23	-0.26	0.38	0.09	0.02	-0.01	-0.47	0.07	-0.39	-0.64	-0.93	-1.08	0.15	0.28	-0.04	-0.4	-0.55	0.25	-0.06	-0.52	0.22	0.38	-1.48	-1.62	-0.22	-0.02	-0.4	-1.24	-2.08	0.12	-0.14	0.4	0.12	-0.32	-0.9
GENE1665X	400986	 LOC400986 -  protein immuno-reactive with anti-PTH polyclonal antibodies	1	0.12	0.03	0.08	0.08	-0.3	-0.7	-0.11	-0.06	-0.39	-0.26	-0.08	-1.54	-0.1	0.51	-0.04	-0.06	-0.45	0.03	0.54	-0.64	0.34	-0.23	-1.4	-1.83	-0.26	-0.55	-0.99	-0.92	-1.59	-0.63	-0.58	0.22	-0.2		-1.24
GENE492X	8911	" CACNA1I -  Calcium channel, voltage-dependent, T type, alpha 1I subunit"	1	0.08	-0.2	0.43	-0.09	-0.2	-1.21	-0.67	0.32	-0.6	-0.18	-0.87	-1.2	-0.04	0.02	-0.11	-0.27	-0.2	0.27	0.66	-0.95	0.49	-0.21	-1.42	-2.19	0.69	-1	-1.35	-0.94	-2.35	-0.2	-0.1	-0.26	0.04	-0.9	-1.33
GENE1838X	23421	 ITGB3BP -  Integrin beta 3 binding protein (beta3-endonexin)	1	-0.3	0	0.3	0.06	-0.06	-0.77	-0.21	-0.01	-0.22	-0.34	-0.59	-0.6	-0.21	-0.14	0.12	-0.45	-0.45	0.68	0.26	-0.3	0.07	-0.02	-1.46	-1.76	0.12	-0.02	-0.72	-1.77	-2.47	-0.91	-0.68	0.35	-0.14	-0.73	-0.3
GENE233X	4811	 NID1 -  Nidogen 1	1	0.22	-0.26	-0.12	-0.14	0.28	-0.09	-0.57	0.1	0	-0.38	0.03	-0.65	0.68	0.1	-0.37	0.04	-0.35	-0.02	0.73	-0.27	0.07	-0.52	-1.61	-2.95	-0.52	-1.12	-0.86	-1.46	-3.27	0.01	-0.34	0.07	0.16	-0.86	0.13
GENE1418X	440533	 PSG8 -  Pregnancy specific beta-1-glycoprotein 8	1	0.19	-0.36	0.09	-0.14	0.21	-0.53	0.35	0.29	0.02	-0.26	0.11	0.21	-0.03	-0.04	-0.28	0.39	0.09	-0.49	0.43	-0.25	0.29	-0.47	-1.21	-1.73	0	-0.62	-0.58	-0.95	-2.06	0.12	-0.8	0.22	0.35	-0.04	0.12
GENE294X	1410	" CRYAB  -  Crystallin, alpha B"	1	1.63	-0.31	-0.47	-0.65	-0.21	-0.39	-0.37	-0.4	0.21	-1.35	0.43	-0.17	-0.59	-0.48	-0.83	-0.21	-1.28	-0.92	0.54	-0.08	0.32	-0.79	-2.94	-3.53	0.03	-0.88	-0.49	-1.9	-3.3	-0.48	-1.98	0.03	-0.53	-0.6	-0.12
GENE845X	2191	" FAP -  fibroblast activation protein, alpha"	1	0.32	0.06	0.29	-0.57	-0.07	0.03	0.04	0.29	0.13	-0.27	0.34	-0.37	-0.32	0.16	0.11	-0.41	-0.93	-0.55	0.32	-0.23	0.04	-0.13	-2.06	-2.19	-0.02	-0.34	-0.61	-1.14	-2.16	0.38	-0.47	-0.11	0.13	-0.22	-0.18
GENE202X	1805	 DPT -  Dermatopontin	1	1.3	0.23	0.68	-2.68	0.49	-0.83	-0.24	0.74	0.01	0.15	-0.24	-1.07	0.33	-0.09	-0.26	0.49	0.05	0.4	-0.06	-0.73	0.86	-0.08	-3.31	-5.4	0.01	-0.46	-0.69	-2.87	-3.23	0.77	-0.23	0.35			-0.23
GENE51X	127435	 PODN -  podocan	1	0.03		0.32	-0.23	-0.11		-0.07	0.78	-0.2	0.21	0.41	0.01	-0.56	0.43	0.43	0	-0.63	-0.17	-0.36	-0.83	0.46	0.73	-1.7	-3.01	0.08	-0.12	-0.45	-1.91	-1.31	-0.85	-1.1	-0.26	-0.27	-0.18	-0.64
GENE304X	26153	 KIF26A -  Kinesin family member 26A	1	0.53	-0.08	0.3	-0.51	-0.26	-0.02	0.5	0.44	-0.24	-0.1	0.62	-0.56	0.09	0.86	0.96	-1.79	-0.33	0.4	-0.11	-0.53	0.08	0.55	-1.73	-2.13	0.02	-0.25	-0.56	-1.85	-1.37	-1.23	-2.23	-0.04	-0.15	-0.91	-1.1
GENE266X	24137	 KIF4A -  kinesin family member 4A	1	0.53	0.01	0.3	-0.58	-0.27	0.16	1.33	0.04	-0.6	-0.12	0.38	-0.97	0.19	0.68	1.02	-1.38	0.29	1.4	-0.22	-0.42	0.27	0.38	-1.62	-2.16	0.04	-0.2	0.82	-1.86	-2.88	0.07	-1.37	0.62	0.2	-0.51	-0.78
GENE833X	55771	 PRR11 -  Proline rich 11	1	-0.06	0.06	0.2	-0.14	-0.1	-0.33	-0.2	-0.21	-0.17	-0.25	-0.28	-0.63	1.05	0.42	-0.17	-0.51	-0.06	-0.01	-0.25	-0.06	0.23	-0.03	-1.7	-1.41	0.12	-0.52	-0.38	-0.96	-1.82	-0.03	-1.06	-0.29	-0.51	-0.23	-0.79
GENE527X	4330	 MN1 -  Meningioma (disrupted in balanced translocation) 1	1	-0.25	-0.43	0.3	0.56	-0.2	0.12	0.42	0.23	0.33	0.52	0.79	-0.4	0.58	-0.03	-1.12	-0.35	-0.3	-0.68	0.23	-0.39	0.55	-0.38	-3.4	-2.43	-0.15	-0.71	0.01	-3.93	-2.39	-0.91	-0.42	-1.47	-0.03	-0.26	-2.39
GENE559X	7277	" TUBA4A -  Tubulin, alpha 4a"	1	-0.19	-0.3	0.24	0.2	0.05	0.05	0.66	-0.03	-0.03	0.06	0.47	0.27	-0.11	0.43	-0.16	-0.1	0.2	-1.25	-0.41	-0.17	0.01	0.56	-0.63	-2.39	0.13	0.21	0.11	-1.58	-2.21	-0.19	-1.72	0.52	0.55	-0.06	-2.2
GENE477X	79987	" SVEP1 -  Sushi, von Willebrand factor type A, EGF and pentraxin domain containing 1"	1	0.54	0.16	0.52	-0.89	-0.31	-0.42	-0.09	0.32	-0.21	-0.61	-0.35	-0.08	-0.37	0.3	-0.07	-0.14	-0.99	-0.25	0.43	-0.41	0.06	-0.09	-1.07	-2.23	-0.19	0.29	-1.06	-1.01	-2.02	-0.63	-1.79	-0.2	0.06	-0.16	-0.71
GENE499X	3625	" INHBB -  Inhibin, beta B"	1	0.99	-0.28	0	-0.82	0.13	0.12	0.04	-0.14	-0.09	-0.32	0.45	-0.46	-0.54	0.4	-0.17	-0.73	-0.48	-0.19	0.69	-0.49	-0.12	-0.09	-1.75	-2.05	-0.07	0.6	-0.14	-0.84	-1.8	-1.16	-1.49	-0.27	0.6	-0.14	-0.79
GENE809X	117248	 GALNTL2 -  UDP-N-acetyl-alpha-D-galactosamine	1	-0.04	0.27	-0.2	-0.24	0.21	0.19	0.03	0.16	-0.16	0.04	0.06	-0.19	-0.2	-0.72	0.09	-0.39	-0.37	-0.8	0.31	-0.85	0.34	0.19	-2.24	-1.95	0.59	-0.41	-1.4	-2.75	-1.28	-2.02	-1.41	-1.37	-0.47	-0.42	-1.75
GENE960X	2949	 GSTM5 -  Glutathione S-transferase mu 5	1	-0.04	0.02	-0.2	-0.15	0.36	-0.24	-0.72	0	-0.01	-0.19	-0.53	-0.03	-0.09	-0.5	-0.45	-0.09	-0.58	-1.67	0.27	-0.41	-0.3	0.43	-1.55	-2.09	-0.14	-1.28	-1.22	-2.36	-0.92	-1.17	-1.59	-1.26	-1.02	-0.95	-1.26
GENE77X	2006	 ELN -  elastin	1	-0.43	0.04	0.26		0.14	-0.54	-0.38	-0.12	0.5	-0.43	0.02	0	-0.11	-0.17	-0.36	-0.35	0.26	-0.87	0.43		-0.42	-0.01		-2.24	-0.29	-0.21	-0.04	-1.67	-2.42	-0.57	-1.42	-0.98	-0.7	-0.37	0.4
GENE482X	9509	" ADAMTS2 -  ADAM metallopeptidase with thrombospondin type 1 motif, 2"	1	-0.14		0	-0.24	0.37	-0.01	-0.16	0.32	-0.06	0.25	0.48	0.24	0.34	0.53		-0.3		-0.23	0.33	-0.83	0.08	0.41	-0.18	-1.72	0.31	0.28	-0.04	-0.77	-2.29	0.36	-0.28	-0.94	0.53	0.17	0.74
GENE189X	25878	 MXRA5 -  Matrix-remodelling associated 5	1	0.49	0.7	-0.06	-0.75	-0.04	-0.07	0.34	-0.1	-0.26	0.16	1.47	-0.05	0.01	0.37	0.63	-0.49	0.04	-0.15	0.02	-0.49	0.32	0.14	-0.6	-1.95	0.06	-0.34	-0.57	-0.57	-2.72	-0.27	-0.9	-0.21	-0.14	-0.31	0.22
GENE770X	27122	 DKK3 -  Dickkopf homolog 3 (Xenopus laevis)	1	-0.7	0.1	0.74	-0.27	0.13	0.33	-0.21	-0.13	-0.14	-0.17	0.27	-0.11	-0.43	0.2	-0.27	-0.87	-0.21	-0.95	0.3	-0.09	-0.24	0.04	-0.6	-1.59	0.28	0.58	-0.32	-0.66	-1.73	0.43	-0.38	0.23	0.02	-0.11	-0.13
GENE183X	113612	" CYP2U1 -  Cytochrome P450, family 2, subfamily U, polypeptide 1"	1	-0.19	0.22	0.48	0.04	-0.53	0.35	-0.17	-0.36	-0.4	0.65	0.82	0.01	0.06	0.95	0.07	-1.09	0.18	-1.45	0.32	-0.74	-0.04	0.47	-0.91	-2.07	-0.03	-0.02	-0.49	-1.07	-2.57	-0.19	-1.37	0.11	0.4	-0.18	-0.33
GENE375X	7076	 TIMP1 -  TIMP metallopeptidase inhibitor 1	1	0.13	0.03	-0.4	0.14	0.09	1.42	1.72	0.14	0.07	0.48	0.15	0.05	-0.15	0.05	-0.14	-0.2	-0.08	-0.82	0.03	0.13	0.07	-0.16	-0.49	-1.4		-0.19	-0.31	-0.35	-3.42	0.52	-1.03	-0.04	0.04	-0.45	-0.57
GENE198X	1464	 CSPG4 -  Chondroitin sulfate proteoglycan 4	1	-0.25	0.11	0.31	0	-0.17	0.43	2.24	0.04	-0.03	0.15	1.14	-0.21	0.01	0.7	0.05	-0.11	0.55	-0.7	-0.03	0.38	-0.02	-0.34	0.19	-1.68	0.16	0.32	0.67	-0.9	-3.01	-0.41	-1.7	-0.29	-0.15	0.37	-0.11
GENE487X	6385	 SDC4 -  Syndecan 4	1	-0.5	-0.14	0.31	0.05	0.28	1.35	1.01	-0.1	-0.02	0.35	1.18	-0.12	0.02	0.02	-0.25	-0.43	0.05	-0.75	0.26	-0.09	-0.26	0.09	-0.02	-2	0.11	0.45	0.6	-0.76	-2.5	0.33	-0.14	-0.07	0.36	0.46	0.13
GENE40X	1278	" COL1A2 -  Collagen, type I, alpha 2"	1	-0.78	-0.24	1.57	-0.45	-0.1	-0.07	0.33	-0.33	-0.19	0.3	0.9	-0.69	-0.2	0.78	-0.21	-0.97	-0.83	-0.55	-1.12	-0.13	0.34	0.92	-1.01		0.62		0.11	-1.82	-4.93	0.51	-0.48		0.5	0.45	-0.05
GENE988X	2014	 EMP3 -  Epithelial membrane protein 3	1	-0.37	-0.13	-0.05	0.32	0.22	0.33	0.17	-0.3	-0.23	0.29	0.2	-0.41	-0.05	-0.2	0.07	-0.3	0.39	-0.58	-1.2	0.88	-0.08	0.4	-0.57	-1.77	0.28	0.21	0.13	-1.28	-3.57	0.34	0.53	0.19	-0.09	0.12	-0.11
GENE964X	10923	 SUB1 -  SUB1 homolog (S. cerevisiae)	1	-0.17	-0.16	0.03	0.04	0.27	-0.03	-0.19	0.06	0.32	0.19	0.18	-0.62	-0.47	-0.48	0.17	0.08	0.02	-1.75	0.43	0.19	-0.08	-0.53	-0.62	-1.34	0.13	0.13	-0.11	-1	-2.7	0.13	-0.19	-0.04	0.13	0.14	-0.62
GENE767X	5111	 PCNA -  Proliferating cell nuclear antigen	1	-0.19	0.29	-0.54	0.66	-0.08	0.25	0.46	-0.29	-0.38	-0.9	0.17	0.99	0.24	-0.56	-0.54	-0.41	-0.11	-0.55	0.68	0	-0.22	-0.57	-2.24	-2.15	-0.01	-0.15	-0.38	-2.1	-2.6	-0.88	-0.69	0.27	-0.41	-0.69	-0.07
GENE1049X	5270	" SERPINE2 -  Serpin peptidase inhibitor, clade E (nexin, plasminogen activator inhibitor type 1), member 2"	1	-0.24	0.09	-0.28	0.39	0.06	0.31	-0.14	-0.01	0.02	-0.15	0.03	-0.04	-0.47	-0.89	-0.35	-0.44	-0.41	-0.99	-0.15	1.68	-0.83	-0.71	-1.68	-1.98	-0.75	-1.16	-1.23	-2.61	-2.49	-0.83	-0.72	-1.71	-1.39	-0.87	-0.76
GENE26X	6273	 S100A2 -  S100 calcium binding protein A2	1	-0.41	-0.09	-0.2	0.03	0.67	1.09	0.61	0.18	-0.01	0.13	1.18	0.3	-0.33	-0.95	-0.62	0.44	-0.53	-1.55	0.23	0.11	-0.6	0.26	-1.54	-2.69	-0.58	-0.5	-0.47	-2.16		-0.44	-1.31	-1.66	-0.99	-0.16	-0.36
GENE1147X	4958	 OMD -  Osteomodulin	1	-0.07	0.28	-0.29	0.09	0	-0.48	-0.18	-0.29	-0.17	-0.12	0.08	-0.35	-0.07	0.08	0.29	0.32	-0.1	0.11	-0.55	0.22	-0.1	0.44	-0.08	-1.22	-0.41	-0.46	-0.94	-2.1	-1.66	-0.64	-0.74	-1	-0.74	-0.62	-0.76
GENE961X	1781	" DYNC1I2 -  Dynein, cytoplasmic 1, intermediate chain 2"	1	0.26	0.06	-0.43	-0.07	0.16	-0.48	-0.51	-0.34	-0.34	-0.81	-1.3	0.03	0.24	-0.24	-0.33	0.01	-0.49	-0.94	0	-0.08	-0.32	0.39	-0.09	-0.48	-0.54	-0.87	-0.6	-1.56	-1.92	-1.46	-2.05	-0.35	0.27	-0.25	-0.98
GENE1044X	10940	" POP1 -  Processing of precursor 1, ribonuclease P/MRP subunit (S. cerevisiae)"	1	-0.22	0.8	-0.07	-0.32	-0.21	-0.22	0.02	-0.47	-0.56	-0.28	-0.17	-0.76	-0.12	-0.24	-0.15	-0.17	0	-1.69	-0.1	0.33	-0.15	-0.09	-1.16	-0.91	-0.7	-0.92	-0.85	-2.24	-2.83	-1.16	-1.88	-0.23	-0.48	0	0.45
GENE14X	23621	 BACE1 -  Beta-site APP-cleaving enzyme 1	1	0.18	0.03	0.21	-0.03	-0.38	-1.43	-1.27	-0.55	-0.35	-0.22		-0.65	0.38	-0.06	-0.48	-0.42	-0.07	0.08	0.34	-1.1	0.49	0.28	-0.74	-1.58	-0.14	-0.5	-1.25	-1.93	-2.5	-0.82	-1.89	-0.08	-1.5	0.09	-0.16
GENE810X	57502	" NLGN4X -  Neuroligin 4, X-linked"	1		-0.17	0.62	-0.45	-0.01	-1.88	-1.86	-0.42	-0.4	-1.22	-1.77	-1.66	0.17	-0.76	-0.85	-0.16	-0.84	-0.42	0.29	-1.12	0.75	0.07	-1.27	-1.25	-0.81	-0.98	-0.99	-1.28	-2.24	-1.38	-2.33	0.47	-1.29	0.4	-0.55
GENE1307X	26160	 IFT172 -  Intraflagellar transport 172 homolog (Chlamydomonas)	1	-0.1	0.21	-0.18	0.07	-0.01	-1.66	-1.21	-0.33	-0.08	-0.87	-1.15	-1.21	0.66	-0.18	-0.26	-0.2	-0.33	-1.12	-0.32	-0.72	0.45	0.6	-0.45	-0.6	-0.63	-1.18		-2.16	-1.4	-1.66	-2.12	-0.06	-0.87	-0.41	-0.67
GENE1614X	327	 APEH -  N-acylaminoacyl-peptide hydrolase	1	0.13	0.08	-0.22	0.13	-0.14	-1	-0.65	-0.57	-0.38	-0.97	-1.76	-1.54	0.29	-0.09	-0.74	-0.69	-0.42	-0.91	-0.41	-0.75	0.94	0.22	-0.29	-0.14	0.28	-0.51	-0.99	-1.92	-1.93	-1.17	-1.31	0.05	-0.14	-0.28	-0.75
GENE480X	56160	 NDNL2 -  necdin-like 2	1	0.14	0.24	-0.54	0.05	0.13	-1.17	-0.71	-0.42	-0.31	-0.74	-1.46	-0.52	0.4	-0.16	-0.35	-0.36	-0.1	-0.72	-0.26	-0.71	0.68	0.3	-0.51	-0.31	-0.66	-0.2	-0.91	-2.38	-2.09	-1.82	-0.4	0.15	-0.27	0.16	-1.48
GENE214X	165721	" DNAJB8 -  DnaJ (Hsp40) homolog, subfamily B, member 8"	1	0.26	0.32	-0.51	-0.28	0.19	-0.05	-1.02	-0.08	0.51	0.5	-1.31	-0.73	-0.36	-1.39	0.57	0.66	0.49	-2.41	0.07	-0.79	0.41	0.31	-0.76	-2.08	-0.67	-1.05	-0.73	-2.89	-1.84	-1.47	-2.14	-0.27	-0.67	-0.1	-1.05
GENE67X	8623	 ASMTL -  Acetylserotonin O-methyltransferase-like	1	0.43	-0.86	-0.29	0.31	0.41	0.25	-0.14	0.09	-0.07	-0.03	-0.74	-0.25	-0.05	-0.79	-0.26	-0.04	-0.23	-1.5	0.11	-0.49	-0.12	0.5	-0.72	-1.22	-0.68	-0.24	-0.84	-1.85		-0.23	-1.76	0.2	-1.19	-0.17	-0.54
GENE397X	10914	 PAPOLA  -  poly(A) polymerase alpha	1	0.14	-0.47	-0.35	0.26	0.4	0.42	0.25	0.21	0.37	0.14	-0.85	0.32	-0.23	-0.94	-0.23	0.63	-0.19	-1.49		-0.2	-0.16	0.37	-0.15	-0.69	-0.63	-0.29	-0.72	-1.4	-1.73	-0.56	-1.9	-0.44	-1.05	-0.44	-0.47
GENE1510X	199720	 GGN -  Gametogenetin	1	0.24	0.15	-0.27	-0.12	0.01	0.24	0.27	-0.1	-0.32	-0.43	-0.49	0.39	0.07	-0.23	-0.12	0.04	0.03	-1.21	-0.27	0.35	-0.12	0.04	-0.84	-0.34	-0.82	-1.06	-0.91	-2.06	-2.07	-1.35	-1.33	-0.31	-0.74	-0.35	-0.53
GENE900X	4703	 NEB -  Nebulin	1	0.29	0.18	-0.44	-0.08	0.06	-0.18	-0.1	-0.24	-0.37	-0.16	-0.45	0.05	-0.44	-0.14	-0.44	-0.12	-0.05	-1.08	-1.03	0.37	0.27	0.38	-0.77	-1.55	-0.83	-0.75	-0.84	-1.89	-1.61	-0.54	-1.84	-0.31	-0.8	-0.44	-1.01
GENE829X	191	 AHCY -  Adenosylhomocysteinase	1	0.29	0.22	-0.25	0.01	-0.02	0.09	-0.53	-0.26	-0.34	-0.11	-0.6	-0.94	-0.19	0.16	-0.21	-0.06	-0.09	-0.83	0.01	0.03	0.01	-0.05	-1.1	-1.69	-1	-1.02	-1.38	-1.86	-2.46	-0.99	-3.02	-0.26	-1	-0.35	-0.98
GENE68X	79796	 ALG9 -  Transcribed locus	1	0.45	-0.05	-0.47	0.1	-0.03	-0.46		-0.11	0.05	-0.31		-0.79	0.34	-0.56	-0.36	0.23	-0.34	-1.83	-0.06		0.23	-0.16	-0.94	-1.41	-0.82	-0.9	-1.45	-2.69		-1.05	-2.22	-0.31	-1.76	0.03	-1.15
GENE69X	6150	 MRPL23 -  Mitochondrial ribosomal protein L23	1	0.19	0.21	-0.27	0.05	-0.2	0.14	-0.41	0.25	0.12	-0.04	-0.83	-0.34	-0.05	-0.42	-0.46	-0.66	-0.43	-1.39	0.11	-0.03	0	-0.09	-1.19	-0.91	-0.77	-1.37	-1.31	-2.23		-0.82	-2.13	-0.82	-1.04	-0.83	-1.63
GENE515X	55892	 MYNN -  Myoneurin	1	0.08	-0.2	-0.13	-0.15	0.41	-0.05	-0.79	-0.13	-0.43	-0.56	-1.03	0.19	0.25	-0.43	-0.41	-0.29	-0.42	-0.88	0.28	-0.41	0.17	-0.05	-0.82	-0.92	-1.14	-1.39	-1.69	-2.02	-1.16	-1.21	-1.42	-0.5	-1.27	-0.5	-0.96
GENE1000X	55757	 UGGT2 -  UDP-glucose glycoprotein glucosyltransferase 2	1	-0.23	0.26	0.07	-0.16	0.07	0.16	0.22	0.01	0.22	0.02	-0.1	0.36	0.35	-0.26	-0.35	-0.01	-0.16	-1.13	0.55	-0.72	0.19	-0.03	-0.28	-0.63	-0.4	-0.64	-1.23	-0.66	-1.69	-0.71	-1.65	-0.01	-1.49	0.45	-0.42
GENE204X	1938	 EEF2 -  Eukaryotic translation elongation factor 2	1	-0.01	-0.06	-0.23	0.27	0.04	-1.28	-0.06	-0.53	-0.26	-0.55	0.02	0.56	0.02	-0.62	-0.71	-0.05	0.12	-0.44	1.32	-1.79	0.15	0.32	-0.47	-0.25	-0.78	-1.3	-1.19	-0.65	-2.36	-1.69	-2.24	-0.61	-1.71	-0.24	-1.05
GENE1054X	129450	 C2orf60 -  Chromosome 2 open reading frame 60	1	0.18	0.07	-0.18	0.03	-0.11	0.13	-0.42	0.19	-0.17	-1.52	-0.02	-0.14	0.34	-0.13	-0.53	0.42	0.03	-1.17	0.94	-1.12	-0.06	0.25	-0.44	-0.01	-0.68	-1.41	-1.18	-0.14	-0.99	-1.62	-0.75	-0.38	-1.84	-0.03	-1.04
GENE518X	7716	 VEZF1 -  Vascular endothelial zinc finger 1	1	0.07	0.21	-0.62	0.39	-0.03	0.43	0.26	-0.13	-0.26	-1.57	-0.23	-0.12	0.06	-0.6	-0.57	0.4	-0.04	-1.2	1.46	-1.75	0.34	-0.06	-0.81	-0.55	-0.79	-1.26	-1.35	-1.02	-3	-1.52	-1.4	-0.42	-1.63	-0.25	-1.67
GENE736X	256281	 NUDT14 -  Nudix (nucleoside diphosphate linked moiety X)-type motif 14	1	0.26	0.03	-0.88	0.2	0.38	-0.32	-0.54	-0.41	-0.24		-1	-0.4	-0.17	-0.59	-0.84	0.25	0.13	-1.56	0.92	-1.8	0.25	0.64	-1.14	-1.29	-0.74	-1.1	-0.88	-1.07	-2.1	-1.71	-1.29	-0.34	-1.69	-0.08	-1.25
GENE1176X	493753	 C2orf64 -  Chromosome 2 open reading frame 64	1	0.32	0.03	-0.72	0.31	0.04	-0.61	-0.59	-0.03	-0.28		-1.35	-1.37	1.16	-0.15	-0.27	0.06	-0.14	-1.25	1.04	-1.32	0.49	-0.2	-0.67	-0.63	-0.76	-1.1	-1.4	-1.45	-2.3	-1.76	-0.71	-0.16	-1.6	0.01	-1.63
GENE22X	11017	 SNRNP27 -  Small nuclear ribonucleoprotein 27kDa (U4/U6.U5)	1	0.41	0.09	-0.6	0.07	0.04	-0.22	0.61	0.43	0.39	0.13	-0.77	-0.3	0		0.2	0.53	0.19	-1.26	0.53	-1.65	0.95	0.17	0.34	0.91	-0.09	-0.59	-0.9	-0.69	-1.95	-0.61		0.41	-0.88	0.75	-0.6
GENE23X	2677	 GGCX -  Gamma-glutamyl carboxylase	1	0.2	-0.01	-0.66	0.02	0.44	-0.71	-0.45	0.38	-0.12	-0.12	-1.07	-1.63	-0.12		-0.23	0.1	-0.47	-2.04	0.31	-1.48	0.74	0.44	-0.08	0.03	-0.12	-0.75	-1.06	-0.52	-2.69	-0.73	-0.63	0.38	-0.96	0.47	-1
GENE411X	9556	 C14orf2 -  Chromosome 14 open reading frame 2	1	-0.1	0.11	-0.68	0.6	0.09	-0.47	-0.47	0.38	-0.06	0.26	-0.84	-1.18	0.07	-0.45	-0.31	0.19	-0.05	-1.66	0.55	-1.37	0.61	0.22	-0.8	-0.17	-0.22	-0.61	-1.18	-0.64	-3.01	-1.38	-1.04	0.19	-0.8	0.21	-0.94
GENE392X	10467	" ZNHIT1 -  Zinc finger, HIT type 1"	1	0.06	-0.02	-0.54	0.57	-0.05	-0.04	-0.15	0.03	-0.14	0.01	-0.7	-0.91	0.11	-0.36	-0.3	-0.08	-0.18	-1.7	0.2	-1.39	0.66	0.52	-0.28	-0.04	-0.18	-0.96	-1.21	-0.35	-3.02	-1.08	-1.35	-0.08	-1.41	-0.08	-1.09
GENE24X	10056	" FARSB -  Phenylalanyl-tRNA synthetase, beta subunit"	1	-0.28	0.77	-0.45	0.08	-0.12	-0.95	-0.6	-0.02	-0.04	-0.58		-1.13	-0.36	-1.14	-0.09	-0.06	-0.51	-2.53	0.68	-1.03	0.2	0.16	-0.56	-0.76	-0.41	-0.35	-0.95	-1.25	-2.12	-0.5	-1.59	-0.03	-0.94	-0.2	-0.25
GENE523X	55004	 C11orf59 -  Chromosome 11 open reading frame 59	1	0.26	0.09	-0.39	0.14	-0.1	-1.24	-1.06	-0.75	0	-0.28	-1.32	-0.54	-0.44	-0.83	-0.58	-0.6	-0.3	-1.97	0.5	-1.46	0.32	0.65	-0.56	-0.28	-0.4	-0.61	-0.77	-1.41	-2.29	-0.41	-1.37	0.15	-0.64	0.36	0.36
GENE1117X	347734	" SLC35B2 -  Solute carrier family 35, member B2"	1	0.16	0.17	-0.31	-0.02	0	-0.45	-0.41	-0.23	0.09	0.11	-0.76	-0.55	-0.2	-0.63	-0.1	-0.12	0.42	-1.97	-0.4	-0.38	0.29	0.29	-0.35	-0.49	-0.21	-0.65	-0.95	-2.04	-2.74	-0.73	-1.52	-0.05	-0.37	0	-0.04
GENE614X	7581	 ZNF33A -  Zinc finger protein 33A	1	0.29	0.45	-0.27	-0.13	-0.32	-0.41	-0.61	-0.69	-0.1	-0.03	-0.99	-0.78	0.12	-0.43	-0.52	0.01	-0.09	-1.74	0.19	-0.54	0.35		-0.43	-0.28	0.06	-0.87	-1.33	-1.17	-2.38	-0.19	-1.04	-0.1	-0.68	-0.03	-0.51
GENE1182X	124961	 ZFP3 -  Zinc finger protein 3 homolog (mouse)	1	0.28	0.16	-0.26	-0.13	-0.03	-0.75	-0.68	-0.11	-0.07	-0.22	-1.22	-0.57	0.24	-0.5	-0.12	0.2	-0.21	-1.31	0.26	-0.39	0.5	-0.38	0.16	-0.09	0.06	-0.98	-1.43	-1.6	-1.99	-1.18	-1.07	0.28	-0.41	-0.3	-0.61
GENE65X	92482	 NCRNA00081 -  non-protein coding RNA 81	1	0.11	0.34	-0.44	0.08	-0.07	-0.33	-0.29	0.01	0.12	0.11	-0.5	0.38	0.37	0.17	-0.02	0.17	0.25	0.01	0.38	-1.21	0.8	0.04	-0.58		0.43	-0.36	-1.26	-1.03	-1.64	-1.63	-1.4	0.19	0.18	0.23	0.69
GENE972X	9338	 TCEAL1 -  Transcription elongation factor A (SII)-like 1	1	-0.04	0.34	-0.69	0.1	0.31	0.18	0.1	-0.25	0.12	0.15	-0.23	-0.07	0.26	0.16	0.14	0.19	0.25	-1.07	0.58	-1.41	0.86	-0.04	-0.37	-0.28	0.46	-0.94	-1.21	-1.86	-2.48	-1.2	-1.82	0.31	0.31	0.1	0.41
GENE1226X	10970	 CKAP4 -  Cytoskeleton-associated protein 4	1	-0.04	0.31	-0.72	0.36	0.11	-0.28	-0.05	-0.23	0.1	0.03	-0.41	-0.13	0.37	0.14	0.05	-0.26	-0.03	-0.9	-0.18	-0.99	0.76	0.4	-0.97	-0.43	0.29	-0.77	-1.12	-2.3	-2.81	-0.41	-0.75	0.59	-0.17	-0.24	0.88
GENE1525X	6609	" SMPD1 -  Sphingomyelin phosphodiesterase 1, acid lysosomal"	1	-0.22	0.23	-0.43	0.3	0.14	-0.83	-0.34	0.73	0.3	0.51	-0.01	0.18	0.5	0.12	-0.08	0	0.3	-0.2	-0.28	-0.81	0.62	0.47	-0.63	-0.82	0.17	-0.61	-1.52	-2.23	-2.54	-0.79	-0.81	-0.22	-0.14	-0.32	0.63
GENE1014X	10535	" RNASEH2A -  Ribonuclease H2, subunit A"	1	0.19	0.25	-0.74	0.16	0.14	-1.38	-0.62	-0.75	-0.1	-0.56	-0.73	-0.27	0.73	-0.22	-0.27	-0.41		-0.56	-0.46	-0.88	0.76	0.57	-1.91	-2.15	-0.75	-1.31	-1.34	-3.21	-3.19	-1.52	-1.52	-0.12	-0.56	-0.38	0.05
GENE1559X	55558	 PLXNA3 -  Plexin A3	1	-0.26	0.29	-0.12	-0.21	0.28	0.17	-0.03	-0.29	-0.1	-0.36	-0.57	-0.39	0.56	-0.31	0.08	0.05	0.23	-0.66	0.38	-0.81	0.33	0.1	-0.34	-1.08	-0.64	-0.36	-0.8	-2.44	-2.37	-0.99	-1.35	-0.24	-0.35	-0.17	0.03
GENE1486X	22838	 RNF44 -  Ring finger protein 44	1	0.46	0.23	-0.49	-0.1	-0.09	-0.6	-0.66	0.04	-0.04	0.28	-0.78	-0.44	0.42	-0.18	0.05	0.62	0.27	-0.73	0.05	-0.74	0.58	0.11	-0.76	-0.84	-0.01	-0.69	-1.55	-2.16	-2.42	-0.3	-0.39	0.05	-0.88	-0.27	-0.63
GENE554X	2037	 EPB41L2 -  Erythrocyte membrane protein band 4.1-like 2	1	0.35	0.16	-0.75	0.07	0.17	-0.23	-0.79	0.53	0.34	0.1	-0.69	-0.87	1.09	0.91	0.04	0.45	0.44	0.08	0.3	-1.66	0.97	0.4	-1	-1.22	-0.28	-0.65	-1.26	-1.46	-3.12	-0.5	-0.46	0.42	-0.8	0.48	-0.81
GENE1840X	23191	 CYFIP1 -  Cytoplasmic FMR1 interacting protein 1	1	-0.21	-0.18	-0.2	0.23	0.35	-0.02	-0.02	-0.11	0.11	-0.16	-1.12	-0.73	0.56	0.55	0.28	0.22	0.49	-0.37	-0.15	-0.41	0.64	-0.09	-0.69	-0.72	0.23	-0.15	-0.53	-2.07	-2.17	-0.7	-0.52	0.21	0.06	0.13	-0.28
GENE758X	154091	" SLC2A12 -  Solute carrier family 2 (facilitated glucose transporter), member 12"	1	0.32	0.28	-0.38	-0.11	-0.1	-0.23	-0.09	-0.1	-0.08	-0.07	-0.61	0.06	0.15	-0.19	-0.2	-0.09	-0.02	-0.63	0.05	-0.39	0.48	-0.13	-1.29	-0.21	0.11	-0.37	-1.04	-2.13	-1.9	-1.27	0.51	0.39	-0.09	0.14	-0.81
GENE379X	7342	 UBP1 -  upstream binding protein 1 (LBP-1a)	1	0.31	0.31	-0.76	0.08	0.05	0.08	0.65	0.75	0.39	-0.02	-0.12	0.17	0.08	0.66	0	0.39	0.16	-0.52	0.5	-1.16	0.29	0.38	-1.05	-0.01	0.09	-0.46	-1.63	-1.8	-2.04	-0.24	0.54	0.09	0.08	0.07	-0.49
GENE220X	283417	 DPY19L2 -  Dpy-19-like 2 (C. elegans)	1	0.16	0.15	-0.54	0.31	-0.1	0.58	0.42	0.3	-0.14	0.09	0.04	0.54	0.56	0.61	0.07	0.41	0.3	-0.69	0.32	-1.65	0.69	0.62	-1.02	-0.12	0.31	-0.95	-0.64	-0.26	-2.73	-1.14	-0.71	0.28	-0.95	0.62	-0.52
GENE395X	8938	 BAIAP3 -  BAI1-associated protein 3	1	0.41	0.14	-0.69	-0.12	0.27	-0.11	-0.09	0.25	-0.03	0.21	-0.47	0.24	0.32	0.17	-0.06	0.46	0	-0.69	0.19	-1.66	0.82	0.64	-1.07	0	-0.43	-1.22	-1.62	-0.25	-2.29	-1.23	-1.11	0.05	-1.22	0.14	-0.5
GENE475X	6720	 SREBF1 -  Sterol regulatory element binding transcription factor 1	1	-0.17	0.2	-0.35	0.37	-0.05	0.12	0.11	0.32	0.15	0.06	-0.29	0.24	0.59	0.26	-0.09	0.34	0.23	0.21	0.42	-1.15	0.42	0.3	-0.9	-0.41	-0.71	-1.22	-1.46	-0.66	-2.76	-1.47	-0.74	-0.59	-1.88	-0.48	-0.88
GENE536X	1174	" AP1S1  -  adaptor-related protein complex 1, sigma 1 subunit"	1	-0.07	-0.08	0.56	-0.28	-0.15	0.62	0.56	-0.14	0.22	0.66	-0.64	-0.64	1.29	0.85	-0.23	0.45	1.03	-0.08	0.38	-1.45	0.76	0.31	-1.58	-1.34	-0.44	-1.15	-1.66	-1.14	-4.16	-1.19	-1.27	-0.03	-1.32	-0.06	-1.28
GENE817X	7041	 TGFB1I1 -  Transforming growth factor beta 1 induced transcript 1	1	0.49	0.63	-0.23	-0.46	-0.43	0.03	0.12	-0.31	0.01	0.05	0.15	0.17	-0.15	-0.21		0.21	0.06	-1.18	-0.04	-0.74	0.63	0.15	-0.46	0.15	0.49	-0.53	-0.94	-0.9	-2.11	-0.78	-1.67	0.06	-0.11	0.35	-0.97
GENE1215X	112970	" KTI12 -  KTI12 homolog, chromatin associated (S. cerevisiae)"	1	0.47	0.02	-0.74	0.03	0.23	-0.1	-0.12	-0.53	0.1	-1.24	-0.83	-0.77	0.08	-0.84	-0.59	0.33	-0.23	-2.41	0.09	-0.69	0.6		-0.69	-1.45	-0.18	-0.3	-0.99	-2.53	-2.67	-0.81	-0.52	0.28	-0.82	0.24	-2.13
GENE260X	5033	" P4HA1 -  Prolyl 4-hydroxylase, alpha polypeptide I"	1	0.29	0.13	0.22	-0.01	-0.61	-0.38	-0.04	-0.54	0.31	-0.12	-0.91	0.6	0.25	-0.9	0.25	-0.29	-1.29	-0.48	0.38	-0.96	0.32	0.25	-0.16	-0.35	-0.37	-0.98	-1.39	-1.79	-3.22	-0.96	-0.03	-0.08	-0.9	0.17	-0.64
GENE349X	51002	 TPRKB -  TP53RK binding protein	1	0.06	-0.66	-0.17	0.02	0.76	0.1	0.67	-0.09	-0.02	-0.06	-0.15	0.99	-0.33	-0.74	-0.21	0.31	0.25	-1.04	1.03	-0.67	-0.33	-0.04	-1	-1.7	-0.91	0.71	-1.26	-2.1	-2.55	-0.9	-1.79	1.01	-1.01	0.38	-1.18
GENE1105X	3949	 LDLR  -  low density lipoprotein receptor	1	0.56	0.19	-0.24	0.33	-0.83	0.2	-0.16	-1.12	-0.55	-0.09	-0.05	-0.54	-0.23	-0.54	-0.41	-0.37	-0.71	-1.53	0.29	-0.68	0.45	-0.06	-1.21	-2	0.22	-0.68	-0.69	-0.85	-1.72	-1.58	-1.71	0.32	-0.65	0.28	-1.23
GENE234X	11142	" PKIG -  Protein kinase (cAMP-dependent, catalytic) inhibitor gamma"	1	0.52	0.47	-0.07	-0.66	-0.25	-0.68	-0.89	-0.64	-0.34	0.21	0.18	-1.07	-0.36	-0.5	-0.39	-0.74	0.23	-1.39	0.06	-0.04	0.09	-0.12	-0.41	-2.82	-0.95	-1.07	-0.63	-1.04	-2.76	-1.51	-1.9	-0.19	-0.88	-0.06	-1.32
GENE1124X	81493	" SYNC -  syncoilin, intermediate filament protein"	1	-0.36	-0.01	0.27	0.22	-0.12	0.19	0.08	-0.34	-0.43	-0.3	0.28	-0.61	-0.59	0.18	0.16	-0.43	0.04	0.2	-0.25	-0.34	0.06	0.54	-1.35	-1.77	0.25	0.39	0.14	-1.61	-0.93	-0.63	-1.45	0.77	0.51	0	-0.89
GENE1069X	728832	 LOC728832  -  Transcribed locus	1	-0.06	0.13	-0.76	0.3	0.38	0.2	-0.12	0.57	0.59	-0.12	0	-0.11	0.73	0.14	0.01	0.58	0.13	-0.07	1.31	-1.17	-0.33	0.18	-0.63	-2.03	0.57	0.17	0.32	-1.43	-1.61	-1.15	-1.49	1.2	0.18	0.78	-1.67
GENE808X	828	 CAPS -  Calcyphosine	1	-0.44	-0.1	0.2	0.3	0.05	0.27	-0.01	0	0.31	0.59	-0.24	-0.66	-0.2	0.13	0.53	0.5	0.47			-0.41	-0.24	0.66	-0.46	-1.15	0.22	0.54	0.48	-1.16	-2.92	-1.28	-1.06	0.63	0.69	0.68	-2.24
GENE699X	6430	" SFRS5 -  Splicing factor, arginine/serine-rich 5"	1	0	0.08	-0.54	0.23	0.23	0.72	0.05	0.36	0.45	0.72	-0.23	-0.54	0.17	0	0.58	0.83	0.61	-0.98	0.04	-0.66	0.59	0.03	-0.46	-0.8	0.57	0.54	0.55	-0.75	-2.32	-0.9	-0.81	1.06	1.03	0.73	-1.87
GENE350X	1655	 DDX5 -  DEAD (Asp-Glu-Ala-Asp) box polypeptide 5	1	-0.27	-0.29	0.5	-0.1	0.17	0.28	-0.28	-1.72	0.3	0.08	-0.02	-0.91	0.21	0.71	0.24	0.25	0.23	-0.4	-0.17	-0.26	-0.05	0.48	-1.12	-0.7	-0.04	0.98	0.93	-0.45	-2	0.14	-0.12	0.62	0.75	0.73	-1.09
GENE359X	1490	 CTGF  -  Connective tissue growth factor	1	-0.37	0	-0.15	0.16	0.36	-0.45	-0.28	-1.09	-0.31	-0.93	-0.46	0.15	0.34	0.26	-1.25	-1.09	-0.96	-1.53	0.69	-0.42	0.05	-0.32	-4.3	-3.89	1.41	1.6	1.04	-1.91	-4.52	-0.67	-1.13	0.92	1.66	1.56	-1.39
GENE1646X	5959	 RDH5 -  Retinol dehydrogenase 5 (11-cis/9-cis)	1	-0.18	-0.17	-0.17	0.22	0.28	0.49	0.58	-0.5	-0.49	0.13	0.14	-0.29	-0.03	-0.37	-0.3	-0.03	-0.04	-0.34	-0.59	0.2	0.23	0.15	-1.64	-0.48	0.76	0.42	-0.33	-0.38	-1.84	-0.06	-0.81	0.56	0.3	0.35	-0.57
GENE789X	387882	 C12orf75 -  chromosome 12 open reading frame 75	1	0.62	0.41	0.26	-0.53	-0.76	0.19	0.7		-0.39	0.01	1.49	-0.06	-0.09	-0.28	-0.19	-0.73	-0.12	-1.04	-0.01	-1.1	0.73	0.39	-0.81	-0.81	0.23	-0.25	-1.01	-1.67	-2.26	-0.39	-0.76	0.25	0.25	0.19	0.38
GENE602X	4237	 MFAP2 -  Microfibrillar-associated protein 2	1	0.74	0.71	0.05	-1.18	-0.32	0.19	-0.27	0.25	-0.47	0.37	0.64	-0.56	0.11	0.31	0.32	-0.89	0.46	-0.25	-0.73	-0.55	0.69	0.59	0.31	-0.12	0.64	0.04	-0.87	-1.7	-2.98	-0.69	-0.85	0.47	0.95	0.73	-0.62
GENE19X	885	 CCK -  Cholecystokinin	1	-0.41	0	0.55	-0.22	0.1	0.45	-0.19	-0.43	0.17	-0.42	0.25	-0.1	-0.04	-0.67	0.39	-1.24	-1.24	-1.32	0.43	-0.75	0.55	-0.23	-1.35	-0.88	-0.32	-1.68	-0.56	-1.78		-0.94	-0.6	-0.92	-0.73	-1.11	-1.47
GENE327X	51690	" LSM7 -  LSM7 homolog, U6 small nuclear RNA associated (S. cerevisiae)"	1	-0.14	-0.35	-0.15	0.34	0.29	0.07	-0.19	0.1	-0.05	0.05	-0.19	-0.64	-0.1	-0.55	-0.09	-0.2	-0.6	-1.98	0.82	0.44	-0.04	-1.21	-1.25	-0.28	0.11	-0.34	-0.1	-0.29	-1.78	0.01	-1	-0.26	-0.3	-0.03	-0.89
GENE708X	51287	 CHCHD8 -  Coiled-coil-helix-coiled-coil-helix domain containing 8	1	0.6	-0.18	-0.27	0.13	-0.26	-0.46	0.01	-0.12	-0.38	-0.64	-0.87	-1.63	-0.32	-0.72	-0.47	-0.38	-0.72	-2.28	0.83	0.12	0.04	-0.99	-1.45	-0.98	-0.12	-0.85	-0.79	-0.93	-2.17	-0.28	-0.88	0.03	-0.35	-0.04	-1.75
GENE1204X	283871	 PGP -  Phosphoglycolate phosphatase	1	-0.05	-0.07	-0.14	0.1	0.14	-0.91	-0.59	-0.21	-0.22	0.01	-0.88	-1.88	-0.36	-0.4	-0.53	-0.14	-0.1	-1.64	0.39	0.28		-0.67	-1.49	-0.35		-0.21	-0.3	-0.65	-0.53	-0.18	-0.53	-0.43	-0.28	-0.1	-1.64
GENE1064X	347862	 PDDC1 -  Parkinson disease 7 domain containing 1	1	0.01	-0.49	-0.03	0.29	0.06	0.14	0.03	-0.21	-0.36	-0.77	-0.47	-1.62	0.09	-0.23	-0.64	-0.44	-0.11	-1.91	0.19	0.09	0.15	-0.42	-1.77	-1.24	-0.39	-0.42	-0.4	-1.42	-0.89	-0.69	-1.53	-0.25	-0.74	-0.35	-1.78
GENE316X	6813	 STXBP2 -  Syntaxin binding protein 2	1	-0.24	-0.23	-0.34	0.56	0.24	-0.16	-0.32	0.16	-0.17	0.37	-0.39	-1.64	-0.19	-0.31	-0.04	0.08	0.24	-1.62	0.51	0.09	-0.26	-0.34	-2.13	-0.67	0.36	-0.47	-0.48	-1.75	-0.23	-0.99	-0.81	-0.38	-0.66	-0.27	-0.9
GENE558X	54539	" NDUFB11 -  NADH dehydrogenase (ubiquinone) 1 beta subcomplex, 11, 17.3kDa"	1	-0.01	-0.07	0.02	0.06	-0.01	-0.32	-0.21	0	-0.28	-0.19	-0.18	-0.87	-0.27	-0.67	-0.19	-0.06	0.19	-0.97	0.58	0.06	-0.2	-0.41	-1.73	-0.09	0.11	-0.66	-0.75	-1.58	-1.15	-0.42	-1.17	-0.51	-0.65	-0.46	-1.71
GENE384X	84991	 RBM17 -  RNA binding motif protein 17	1	0.04	-0.24	-0.3	0.25	0.27	-1.32	-1.03	0.34	0.05	-0.72	-0.37	-1.99	-0.3	-0.58	0.18	0.05	0.08	-2.01	0.82	-0.05	-0.11	-0.66	-1.6	-0.63	0.4	-0.01	-0.2	-1.35	-0.69	-0.5	-1.36	0.61	1.74	0.42	-1.86
GENE190X	275	 AMT -  Aminomethyltransferase	1	0.04	0.03	-0.44	-0.04	0.4	-0.96	-0.53	0.15	0.65	-0.57	0.07	-1.69	0.01	-0.63	-0.51	0.05	-0.76	-0.85	0.63	-0.1	0.43	-0.95	-2.48	-0.14	0.23	-0.74	-0.96	-0.7	-0.79	-0.44	-0.88	-0.34	0.38	-0.05	-0.69
GENE256X	128866	 CHMP4B -  Chromatin modifying protein 4B	1	-0.08	-0.33	0.34	0.14	-0.06	-0.46	-0.69	0.43	0.02	0.33	-0.77	-1.83	-0.29	-0.34	0.21	0.54	0.64	-0.34	0.84	-1.26	0.38	0.04	-0.34	-0.66	0.01	-0.49	-0.47	-0.25	-1.71	0.3	-0.17	0.35	0.38	-0.01	-0.69
GENE632X	26093	 CCDC9 -  Coiled-coil domain containing 9	1	0.09	0.52	-1.08	0.11	0.36	0.28	0.38	1.36	1.28	1.63	-0.63	-1.3	0.16	-0.13	1.2	1.03	0.6	0.07	-1.27	-0.37	0.8	0.85	-0.4	-0.19	0.89	0.49	-0.16	-0.64	-1.98	-0.51	-1.29	1.11	1.17	0.03	-1.19
GENE768X	3945	 LDHB -  Lactate dehydrogenase B	1	-0.21	0.05	0.29	0.01	-0.15	0.25	-0.11	1.09	1	1.3	-1.09	-2.78	-0.4	-0.49	0.95	0.2	0.14	-0.34	-0.22	-0.35	0.09	0.5	-1.22	-0.49	0.28	0.05	-0.31	-1.29	-2.23	-0.81	-1.96	0.41	0.55	-0.5	-1.2
GENE1367X	10123	 ARL4C  -  ADP-ribosylation factor-like 4C	1	-0.07	0.03	-0.06	0.16	-0.06	-0.05	-0.26	0.23	0.45	0.9	-0.51	-1.72	-0.58	-1.04	0.47	0.27	-0.16	0.39	0.01	0.15	-0.2	0.05	-1.26	-0.73	0.24	0.32	-0.59	-1.26	-1.32	-0.56	-1.76	0.17	-0.02	-0.44	-0.71
GENE813X	10123	 ARL4C -  ADP-ribosylation factor-like 4C	1	-0.07	0.03	-0.06	0.16	-0.06	-0.05	-0.26	0.23	0.45	0.9	-0.51	-1.72	-0.58	-1.04	0.47	0.27	-0.16	0.39	0.01	0.15	-0.2	0.05	-1.26	-0.73	0.24	0.32	-0.59	-1.26	-1.32	-0.56	-1.76	0.17	-0.02	-0.44	-0.71
GENE17X	1462	 VCAN -  versican	1	-0.16	0.02	-0.09	0.18	0.06	-0.56	-0.93	0.64	0.3	0.58	-0.1	-1.34	-0.98	-0.14	0.41	1.08	0.16	-1.04	-0.31	0.4	-0.17	0.08	-0.29	-2.62	-0.07	0.17	-0.31	-0.76		-0.69	-1.93	0.04	0.13	-0.15	-0.39
GENE996X	23654	 PLXNB2 -  Plexin B2	1	-0.37	-0.13	0.26	0.18	0.07	-0.2	-0.39	-0.09	-0.33	-0.19	-1.32	-2	-0.14	-0.3	-0.38	-0.37	-0.22	-0.84	0.06	0.1	-0.09	-0.07	-0.61	-1.92	0.1	0.04	-0.47	-0.96	-0.71	-0.36	-1.66	0.08	-0.11	-0.49	-0.6
GENE1X	23199	 KIAA0182 -  KIAA0182	1	0.26	0.02	-0.17		-0.1	-0.86	-0.16	-0.12	-0.59	-0.32	-1.31	-2.49	-0.06	0.19	-0.37	-0.23	-0.26	-0.67	0.55		0.08	-0.64		-3.12	0.36	0.51	0.5	-0.96	-0.45	-1.17	-1.63	-0.36	-0.04	0.38	-0.68
GENE370X	51374	 C2orf28 -  Chromosome 2 open reading frame 28	1	-0.87	1	-0.43	0.08	0.24	-2.02	-1.15	-0.13	-0.18	-0.35	-1.1	-1.83	-0.02	-0.46	-0.41	-0.88	-0.27	-0.74	0.03	0.61	-0.58	-0.07	-0.97	-1.46	-0.05	-0.25	-0.34	-1.4	-1.69	-1.04	-0.48	-1.1	-0.71	-0.48	0.35
GENE15X	10195	" ALG3 -  Asparagine-linked glycosylation 3, alpha-1,3- mannosyltransferase homolog (S. cerevisiae)"	1	-0.57	-0.77	0.39	0.24	0.71	-0.86	-0.56	-0.08	-0.19	-0.37	-0.63		0.15	-0.46	-0.74	-1.09	-0.31	-0.55	-0.1	0.31	-0.41	0.19	-0.64	-0.8	0.56	-1.18	-0.88	-1.84	-1.69	-0.94	-0.66	-1	-1.08	-0.16	-0.18
GENE1062X	8916	 HERC3 -  Hect domain and RLD 3	1	-0.44	-0.04	0.15	0.05	0.27	-1.19	-0.84	0.18	-0.19	-1.77	-1.01	-1.47	-0.06	0	-0.87	-0.62	-0.58	-0.35	0.6	0.06	-0.26	-0.4	-1.71	-0.72	-0.39	-1.09	-0.54	-1.4	-1.57	-1.28	-0.94	-1.43	-0.41	-0.89	-0.36
GENE408X	51650	 MRPS33 -  Mitochondrial ribosomal protein S33	1	-0.59	-0.28	0.06	0.05	0.77	-1.93	-0.61	-0.15	-0.72	-0.6	-1.46	-2.37	0.04	-0.05	-1.27	-0.7	-0.64	-0.82	-0.29	1.02	0.17	-0.91	-0.81	-0.15	-0.02	-0.64	-0.67	-1.67	-1.63	-1.1	-0.34	-0.03	0.3	-0.97	-0.12
GENE385X	8209	 C21orf33 -  Chromosome 21 open reading frame 33	1	-0.48	-0.52	0.11	0.44	0.46	-1.32	-0.76	-0.14	-0.23	-1.08	-0.98	-2.08	0.39	-0.05	-0.7	-0.81	-0.83	-0.44	0.1	0.57	-0.58	-0.37	-0.78	0.12	-0.26	-1.01	-0.6	-1.18	-1.89	-1.01	-1.12	-0.96	-0.81	-0.93	-1.01
GENE425X	3420	 IDH3B -  Isocitrate dehydrogenase 3 (NAD+) beta	1	-0.58	-0.02	0.08	0.18	0.33	-0.6	-0.72	-0.25		-0.1	-0.76	-1.6	-0.01	-0.3	-0.46	-0.19	-0.14	-0.56	-0.06	0.87	-0.13	-0.69	-0.61	0.62	-0.43	-0.62	-0.69	-1.44	-2.38	-0.94	-0.92	-0.57	-1.04	-0.75	-0.47
GENE372X	9770	 RASSF2 -  Ras association (RalGDS/AF-6) domain family member 2	1	0.89	0.51	0.63	-2.93	0.89	-1.5	-2.05	1.14	0.69	0.65	-0.94	-2.48	0.22	0.06	0.81	1.25	1.1	-0.1	0.12	-0.66	0.56	-0.02	-2.53	-2.12	0.38	-0.13	-0.67	-2.09	-2.24	-1.7	-2.92	0.78	0.75	-0.34	-1.42
GENE1412X	2548	" GAA -  Glucosidase, alpha; acid"	1	0.27	-0.29	0.25	-0.53	0.28	-1.26	-2.28	0.53	0.08	0.19	-0.35	-2.38	0.39	0.19	-0.07	0.39	0.1	0.18	0.48	-0.67	0.42	-0.23	-1.18	-1.43	-0.32	-0.92	-0.55	-0.78	-0.6	-0.24	-0.97		0.07	-0.69	-0.12
GENE1029X	55486	" PARL -  Presenilin associated, rhomboid-like"	1	-0.07	-0.32	0.17	0.06	0.16	-1.62	-1.38	-0.29	-0.05	-0.43	-1.62	-1.58	-0.78	-0.32	-0.08	0.92	0	-0.76	0.89	-1.14	0.12	0.12	-0.17	-0.28	0.95	-0.56	-0.31	0	-1.25	-0.34	-1.09	0.25	0	0.17	-0.58
GENE1066X	284942	 RPL23AP82 -  Ribosomal protein L23a pseudogene 82	1	0.71	-0.43	-0.97	0.38	0.32	-1.27	-1.2	0.11	0.27	0.18	-2.54	-1.54	-0.7	-0.6	0.18	0.71	0.29	-1.66	0.25	-0.66	0.56	-0.15	-0.26	-0.31	-0.22	-0.29	-0.95	-0.51	-0.84	-0.43	-0.81	-0.22		-0.62	-1.12
GENE1111X	51266	" CLEC1B -  C-type lectin domain family 1, member B"	1	0.55	0.31	-0.79	-0.1	0.03	-1.5	-1.94	-0.65	0.03	-0.53	-2.44	-1.23	-0.03	-0.58	-0.13	0.46	-0.16	-1.8	-0.39	-0.28	0.28	0.4	-0.22	-0.43	0.19	-0.85	-0.37	-1.25	-0.63	-1.03	-0.94	0.04	-0.44	0.06	-0.3
GENE96X	29062	 WDR91 -  WD repeat domain 91	1	0.14	0.19	-0.66	-0.02	0.36	-2.02	-2.4	-0.32	-0.05	-0.7		-2.03	-0.28	-0.84	0.24	-0.04	-0.4	-2.09	0.13	-1.05	0.49	0.43	-0.71	-0.95	-0.57	0.28	-0.74	-1.87	-1.6	-1.03	0.22	0.48	-0.11	0.43	-0.82
GENE1222X	56915	 EXOSC5 -  Exosome component 5	1	-0.39	-0.03	-0.23	0.5	0.15	-1.89	-1.61	-0.04	-0.24	-0.62	-2.01	-2.56	-0.23	-0.41	-0.38	-0.82	-0.72	-1.68	-0.24	-0.03	0.03	0.24	-1	-0.37	0.2	-0.43	-0.5	-0.47	-1.63	-1.39	-0.6	-0.29	-0.82	0.19	0.33
GENE967X	11145	" PLA2G16 -  Phospholipase A2, group XVI"	1	-0.47	0.11	0.17	0.5	-0.31	-1.63	-1.59	-0.22	-0.53	-0.32	-1.71	-1.67	-1.35	-0.19	-0.21	-0.68	-0.52	-1.79	0.04	-0.37	0.17	0.17	-0.95	-0.19	0.38	-0.17	-0.49	-0.49	-1.54	-1.29	-1.02	-1.15	-0.28	-0.22	-0.5
GENE793X	100129701	 LOC100129701  -  hypothetical protein LOC100129701	1	-0.13	0.02	-0.34	0.33	0.12	-1.42	-1.23	0.4	0.36	-0.04	-1.71	-2.4	-0.87	-0.54	0.21	0.28	0.07	-1.73	0.17	-0.46	0.35	-0.05	-1.69	-0.84	0.53	0.07	-0.17	-1.05	0.19	-1.36	-1.34	-0.27	0.37	0.44	-0.02
GENE666X	64115	 C10orf54 -  Chromosome 10 open reading frame 54	1	-0.24	-0.86	0.14	0.54	0.44	-2.53	-1.75	0.61	-0.28	0.16	-1.79	-2.92	-0.66	-0.6	-0.7	-0.82	-0.7	-2.93	0.47	-1.04	0.19	0.38	-2.1	-2.58	-0.19	-1.25	-0.09	-2.67	-1.62	-1.41	-1.39	-0.93	-0.09	-0.58	-1.03
GENE1133X	64943	 NT5DC2 -  5'-nucleotidase domain containing 2	1	-0.37	-0.19	0.49	0.15	-0.06	-2.1	-2.15	-0.28	-0.39	-0.25	-1.17	-2.14	-0.38	-0.21	-0.32	-0.18	-0.13	-1.39	-0.1	-0.1	-0.11	0.3	-0.79	-1.22	-0.14	-0.01	-0.23	-0.88	-1.7	-1.84	-2.39	0.22	-0.31	-0.38	-2.09
GENE944X	55846	 ITFG2 -  integrin alpha FG-GAP repeat containing 2	1	-0.37		0.31	0.15	-0.08	-1.69	-1.45	-0.08	0.05	-0.16	-1.07	-2.4	-0.78	-0.62	-0.1	-0.05	0.12	-0.97	0.23	-0.07	-0.33	0.18	0.09	-0.67	-0.19	-0.09	-0.54	-0.94	0.03	-0.84	-0.53		0.1	-0.55	-1.33
GENE1608X	6319	 SCD -  Stearoyl-CoA desaturase (delta-9-desaturase)	1	0.28	-0.07	-0.09	-0.1	-0.02	-2.33	-1.71	-0.34	-0.17	-0.4	-1.13	-1.08	-2.11	-1.11	-0.11	-0.34	-0.93	-1.09	-0.38	0.57	-0.06	-0.13	-0.95	-1.44	-0.39	-0.2	-0.53	-1.47	-1.83	-1.06	-1.99	-0.3	-0.31	-0.32	-0.72
GENE250X	1717	 DHCR7 -  7-dehydrocholesterol reductase	1	0.47	0.27	-0.47	-0.24	-0.01	-1.99	-2.15	-0.66	-0.33	-0.8	-0.81	-2.25	-2.23	-1.77	-0.75	-0.39	-0.62	-2.4	0.09	0.09	-0.14	-0.05	-1.94	-3.75	-0.65	-0.73	-1.67	-3.27	-4.01	-1.31	-3.44	-0.5	-0.94	-0.62	-1.48
GENE236X	5836	" PYGL -  Phosphorylase, glycogen, liver"	1	0.26	-0.2	0.1	-0.02	-0.15	-1.92	-0.83	-0.31	-0.45	-0.98	-1.84	-1.88	-0.02	0.75	-0.57	-0.27	-0.92	-0.61	0.26	-1.05	0.53	0.27	-1.03	-1.76	0	-0.4	-0.68	-0.64	-2.14	-0.45	-2.06	0.35	0.38	-0.33	-0.95
GENE1223X	8445	 DYRK2 -  Dual-specificity tyrosine-(Y)-phosphorylation regulated kinase 2	1	-0.25	0.18	-0.52	0.5	0.09	-1.32	-1.74	-0.07	0	-0.15	-1.67	-2.75	0.34	0.23	-0.15	0.01	0.22	0.47	0.03	-0.38	0.04	0.31	-0.65	0.17	-0.02	0.13	-0.37	-1.01	-1.2	-1.07	-1.35	-0.56	0.43	0.52	-0.33
GENE942X	112936	 VPS26B -  Vacuolar protein sorting 26 homolog B (S. pombe)	1	-0.45	0.5	0.11	0.07	-0.24	-1.67	-1.31	-0.2	-0.33	-0.37	-1.25	-1.94	-0.28	0.11	-0.34	-0.51	-0.02	0.7	0.12	-0.22	-0.2	0.31	-0.61	-0.77	0.05	0.5	0	-0.93	-1.66	-0.62	-1.81	-0.44	0.71	0.05	-0.58
GENE473X	84279	 C2orf7 -  Chromosome 2 open reading frame 7	1	-0.15	-0.07	-0.56	0.62	0.18	-2.19	-1.27	-0.58	-0.13	0.05	-0.99	-1.63	-0.05	0.3	0.08	-0.33	0.02	-0.25	-0.37		-0.06	0.42	-0.3	-1.22	0.09	0.08	-0.11	-0.92	-1.6	-0.55	-1.46	-1	-0.02	-0.32	-0.11
GENE594X	84316	 LSMD1 -  LSM domain containing 1	1	-0.21	-0.04	-0.93	0.6	0.56	-2.02	-0.86	-0.07	0.12	0.24	-0.73	-1.42	-0.02	0.28	-0.16	-0.4	0.14	-0.81	-0.9	-0.09	0.54	0.46	-0.53	-1.06	0.78	0.31	0.31	-1.06	-1.85	-0.99	-0.77	-0.41	0.45	0.49	0
GENE444X	10654	 PMVK -  Phosphomevalonate kinase	1	-0.45	0.17	-0.25	0.5	0.04	-1.71	-0.88	-0.33	-0.26	-0.25	-0.92	-0.92	-0.04	0.26	-0.24	-0.32	-0.15	-0.18	-0.65	-0.03	0.4	0.29	-0.32	-0.11	1.09	0.28	-0.12	-0.58	-2.14	-0.28	-1.72	0.67	0.49	0.42	0.01
GENE1656X	311	 ANXA11 -  Annexin A11	1	-0.15	-0.03	0.05	0.26	-0.12	-0.31	-0.55	-0.09	-0.2	-0.23	-1.12	-1.42	0.02	0.04	-0.44	-0.15	-0.08	-0.3	0.14	-0.52	0.37	0.02	-1.39	-1.28	0	-0.5	-0.54	-0.86	-2.19	-0.33	-1.93	0.49	0.29	-0.46	0.17
GENE617X	79022	 TMEM106C -  transmembrane protein 106C	1	-0.17	-0.02	0.36	-0.18	0.02	-0.82	0.43	-0.34	0.01	-0.31	-0.67	-0.67	0.23	0.15	-0.49	-0.13	-0.02	0.2	0.41	-0.31	0.26	-0.35	-1.6	-1.77	0	-0.51	-0.47	-0.94	-1.82	-0.34	-1.58	0.38	0.09	0	0.44
GENE695X	8076	 MFAP5 -  Microfibrillar associated protein 5	1	-0.06	-0.04	0	-0.09	0.21	0.23	-0.25	-0.15	0	0.08	-0.16	-0.83	0.54	0.25	-0.16	0.46	0.14	0.61	-0.08	0.24	0.34	-0.5	-0.81	-1.84	0.32	0.08	-0.07	-0.41	-3.01	0.8	-0.12	0.66	0.08	0.14	-0.09
GENE248X	9688	 NUP93 -  Nucleoporin 93kDa	1	-0.31	-0.15	0.22	0.14	0.1	0.9	-1.33	0.21	-0.15	-0.12	-1.21	-1.79	-0.11	-0.08	-0.25		-0.24	-0.64			0.13	-0.13	-1.2	-1.68	-0.46	-0.61	-0.77	-1.08	-2.83	0.74	-0.82	0.12	-0.02		0.11
GENE299X	8869	" ST3GAL5 -  ST3 beta-galactoside alpha-2,3-sialyltransferase 5"	1	-0.2	0.1	-0.04	0.15	0	0.07	-0.55	-0.46	-0.76	-0.74	-1.54	-2.6	-0.01	0.25	-0.09	-0.46	-0.62	-0.68	0.13	-0.14	-0.22	0.22	-0.98	-1.57	-0.07	0.92	0.01	-1.64	-4.56	0.79	-0.58	0.22	0.43	0.16	0.79
GENE3X	2566	" GABRG2 -  Gamma-aminobutyric acid (GABA) A receptor, gamma 2"	1	0.48	0.41	-0.36	-0.26	-0.27	-0.81	-1.36	-1.72	-0.19	-0.73		-1.74	0.14	0.31	-0.36	-0.42	-0.28	-1.51	0.1	-0.6	0.5	0	-0.9	-0.81	0.44	0.04	-0.62	-0.94	-2.1	-0.28	-0.9	0.56	0.19	0.76	-0.47
GENE756X	84901	" NFATC2IP -  Nuclear factor of activated T-cells, cytoplasmic, calcineurin-dependent 2 interacting protein"	1	0.24	0.27	-0.22	-0.24	-0.03	-0.37	-1.1		-0.19	-0.56	-2.12	-1.63	0.13	0.49	-0.24	-0.06	0.16	-0.86	0.01	-0.03	0.43	-0.42	-0.84	-1.79	0.34	-0.04		-1.47	-3.26	-0.1	-1.43	0.29	0.23	0.71	-0.84
GENE1038X	72	" ACTG2 -  Actin, gamma 2, smooth muscle, enteric"	1	0.21	-0.37	-0.08	0.41	-0.16	-0.95	-1.81	-2.34	-0.33	-0.86	-2.28	-2.25	0.32	0.13	-0.19	0.12	0.4	-1.57	-0.31	0.35	0.19	-0.23	-0.94	-1.76	-0.21	0.17	-0.43	-2.28	-3.31	-0.29	-0.99	0.41	-0.18	0.71	-0.93
GENE893X	60	" ACTB -  Actin, beta"	1	0.09	0.01	0.09	-0.12	-0.07	-0.85	-1.63	-1.41	-0.31	-0.82	-1.93	-2.45	0.2	0.22	-0.38	-0.23	0.12	-0.98	0.19	-0.31	0.09	0.03	-1.81	-2.28	0.6	-0.03	-0.94	-1.02	-2.15	0.15	-0.93	0.06	-0.12	-0.01	-0.68
GENE1119X	57619	 SHROOM3 -  shroom family member 3	1	0.01	-0.12	0.76	-0.27	-0.39	-0.07	-0.05	-0.32	-0.31	0.03	-0.55	-0.37	-0.02	0.33	-0.02	-0.32	-0.44	-0.4	0.31	0.06	-0.5	0.13	-1.05	-3	0	0.02	-0.33	-1.19	-2.94	-0.42	-0.5	-0.16	-0.06	-0.14	-1.23
GENE1771X	9978	 RBX1 -  Ring-box 1	1	-0.08	0	-0.29	0.05	0.33	-0.37	-0.44	0.11	-0.2	0.05	-0.54	-0.53	-0.07	-0.08	0.08	-0.06	-0.16	-1.21	-0.04	-0.11	-0.15	0.29	-0.85	-1.65	-0.22	0.04	-0.66	-1.78	-3.01	0.11	-0.14	0.3	-0.13	0.17	-0.74
GENE419X	5441	" POLR2L -  Polymerase (RNA) II (DNA directed) polypeptide L, 7.6kDa"	1	-0.55	-0.23	0.16	0.36	0.28	0.36	0.31	0.1	-0.27	0.19	0.09	-1.15	-0.28	-0.16	-0.06	-0.56	-0.06	-1.99	0.04	-0.23	-0.18	0.36	-1.34	-2.57	0.25	0.11	0.11	-2.45	-4.4	0.2	0.14	0.04	0.07	0.01	0.03
GENE653X	6281	 S100A10 -  S100 calcium binding protein A10	1	-0.2	-0.57	0.09	0.24	0.42	-0.22	-0.24	-0.04	-0.05	0.61	0.06	-1.54	-0.18	-0.48	0.25	-0.09	0.2	-1.33	0.03	0.42	-0.01	-0.44	-0.96	-2.99	-0.07	0.05	0.35	-2.75	-4.27	-0.41	0.18	0.42	0.27	0.28	-0.73
GENE881X	1289	" COL5A1 -  Collagen, type V, alpha 1"	1	-0.49	-0.05	0.45	-0.18	0.28	0	-0.73	0.1	-0.02	0.31	0.11	-0.82	0.08	0.25	-0.4	-0.4	-0.15	-0.41	-0.06	-0.17	-0.07	0.3	-1.27	-2.22	0.07	0.08	-0.4	-2.54	-2.99	-0.57	-1.21	-0.01	-0.08	-0.14	-0.71
GENE746X	9902	" MRC2 -  Mannose receptor, C type 2"	1	0.19		0.03	-0.05	-0.17	-0.22	-0.96	-0.05	-0.38	0.22	-0.25	-0.95	-0.28	-0.2	-0.81	-0.56	-0.05	-0.03	0.27	-0.2	-0.08		-1.38	-2.75	0.12	0.19	-0.44	-1.97	-3	-0.4	-0.75	-0.52	-0.26	-0.36	-0.46
GENE381X	7070	 THY1  -  Thy-1 cell surface antigen	1	-0.26	0.14	0.3	-0.13	-0.02	0.21	-0.5	0.05	-0.01	-0.02	-0.09	-0.59	0.05	0.47	0.09	-0.1	-0.33	-0.59	0.25	-0.36	-0.08	0.19	-1.08	-2.3	0.1	-0.17	-0.35	-1.18	-2.98	0.13	-0.39	-0.17	-0.18	-0.2	-0.08
GENE550X	7070	 THY1 -  Thy-1 cell surface antigen	1	-0.26	0.14	0.3	-0.13	-0.02	0.21	-0.5	0.05	-0.01	-0.02	-0.09	-0.59	0.05	0.47	0.09	-0.1	-0.33	-0.59	0.25	-0.36	-0.08	0.19	-1.08	-2.3	0.1	-0.17	-0.35	-1.18	-2.98	0.13	-0.39	-0.17	-0.18	-0.2	-0.08
GENE249X	5627	 PROS1 -  Protein S (alpha)	1	-0.52	0.12	0.2	0.11	0.09	-1.08	-1.13	0.83	-0.1	0.17	-1.06	-1.46	-0.04	0.96	0.59	-0.24	0.11	-0.68	-0.18	-0.32	0.01	0.49	-1.15	-3.3	0.17	-0.04	-0.44	-1.52	-3.55	0.16	-0.37	0.17	0.2	0.03	-0.32
GENE1016X	348235	 SKA2 -  Spindle and kinetochore associated complex subunit 2	1	-0.46	0.02	0.28	0.06	0.1	-1.29	-0.42	0.07	-0.1	-0.41	-1.08	-1.56	-0.32	-0.06	0.04	-0.27	-0.14	-0.99	-0.04	-0.26	-0.2	0.5	-1.63	-3.16	0.03	0.08	-0.63	-2.21	-3.55	-0.33	-0.35	0.43	0.2	-0.28	-0.86
GENE309X	4053	 LTBP2 -  Latent transforming growth factor beta binding protein 2	1	-0.3	0.1	0.25	0.07	-0.11	-1.64	-0.8	0.26	-0.21	0.2	-0.77	-0.61	-0.58	-0.79	0.2	-0.22	-0.04	-0.62	-0.29	-0.83	0.61	0.52	-1.07	-4.01	-0.12	-0.1	-0.34	-2.01	-4.49	-0.04	-0.71	0.04	0.18	-0.22	-0.08
GENE925X	3068	 HDGF -  Hepatoma-derived growth factor	1	-0.41	-0.05	0.11	0.16	0.24	-0.57	-0.57	0.03	-0.08	-0.13	-0.93	-1.41	0.45	0.37	0.01	0	0.36	0.69	-0.09	-0.34	-0.1	0.62	-0.73	-1.54	0.25	0.19	-0.09	-1.67	-3.02	0.24	-0.01	0.18	0.19	-0.07	-0.28
GENE741X	4833	" NME4 -  Non-metastatic cells 4, protein expressed in"	1	-0.37	-0.29	0.4	0.09	0.15	-1.2	-1.01	-0.1	-0.39	0.08	-0.34	-0.97	-0.07	0.8	-0.08	-0.33	-0.18	0.3	-0.16	-0.28	-0.09	0.52	-0.8	-2.1	0.14	0.19	0.01	-1.54	-2.04	-0.34	-1.2	0.34	-0.03	-0.1	-0.37
GENE276X	55752	 SEPT11 -  Septin 11	1	-0.27	0.08	-0.05	0.16	0.11	-0.75	-0.9	-0.16	-0.38	-0.23	-0.56	-1.2	0.22	0.58	0.09	-0.12	-0.15	0.33	0.21	-0.37	-0.29	0.44	-1.16	-2.64	-0.01	-0.04	-0.66	-1.54	-3.12	-0.28	-1.89	-0.51	-0.18	-0.36	-0.74
GENE1289X	7106	 TSPAN4 -  tetraspanin 4	1	-0.18	0.07	0.31	-0.15	-0.06	-0.75	-1.01	-0.68	-0.39	-0.23	-0.23	-0.84	0.2	0.58	-0.21	-0.31	-0.03	0.41	-0.05	0.01	0	0.05	-1	-2.1	0.05	-0.4	-0.46	-1.75	-2.79	-0.34	-0.38	-0.57	-0.5	-0.34	-0.51
GENE588X	23	" ABCF1 -  ATP-binding cassette, sub-family F (GCN20), member 1"	1	-0.43	-0.19	0.53	-0.02	0.1	-0.94	-1.05	0.08	-0.2	0.24	-0.04	-1.57	0.42	0.83	0.09	-0.56	-0.03	0.12	-1.01	0.49	-0.01	0.53	-0.61	-2.34	0.13	0.18	-0.14	-1.82	-2.69	-0.33	-0.6	-0.98	0.27	-0.11	-0.22
GENE1499X	6274	 S100A3 -  S100 calcium binding protein A3	1	-0.04	0.2	-0.24	0.17	-0.1	-0.91	-1.65	0.6	0.42	0.59	-0.38	-0.7	0.03	-0.35	0.82	0.23	0.29	-0.9	-0.58	0.23	0.36	-0.02	-0.97	-2.2	0.43	-0.22	-0.44	-2.01	-3.46	0.04	-0.11	0.3	0.09	0.19	-0.99
GENE301X	6275	 S100A4 -  S100 calcium binding protein A4	1	-0.16	0.01	-0.93	0.73	0.34	-0.3	-0.79	0.06	-0.14	0	-0.86	-1.72	0.01	-0.38	-0.52	0.41	0.09	-2.62	0.31	-0.88	0.62	-0.05	-2.42	-3.29	0.17	-0.5	-1.5	-2.17	-5.62	-1.3	-1.28	0.08	-0.86	0.01	-0.82
GENE1114X	387103	 CENPW -  Centromere protein W	1	-0.15	-0.11	-0.1	0.12	0.24	0.18	-0.9	-0.02	-0.23	-0.16	-0.74	-1.97	0.03	0.06	-0.35	-0.06	-0.55	-2.12	0.1	0.23	0.2	-0.5	-1.73	-2.27	0.23	-0.17	-0.55	-2.2	-2.71	-0.63	-1.05	0.37	0.02	-0.28	-1.05
GENE716X	2647	" BLOC1S1 -  Biogenesis of lysosomal organelles complex-1, subunit 1"	1	-0.01	-0.32	0.2	0.16	-0.03	-0.65	-0.25	-0.19	-0.37	-0.51	-1.21	-2.63	-0.56	-0.31	-0.38	-0.48	-0.3	-1.97	0.24	0.22	-0.19	-0.28	-1.54	-2.11	-0.09	-0.13	-0.46	-1.34	-2.88	0.22	-0.33	0.43	-0.51	-0.46	-0.79
GENE423X	4637	" MYL6 -  Myosin, light chain 6, alkali, smooth muscle and non-muscle"	1	-0.29	-0.08	0	0.27	0.08	-0.28	-0.12	-0.12	-0.21	-0.01	-0.21	-1.33	0.13	0.19	-0.2	-0.1	-0.03	-1.25	0.28	0.5	-0.19	-0.61	-1.59	-2.06	0.43	-0.06	-0.34	-1.44	-2.58	0.82	0.01	-0.26	-0.73	-0.08	-0.6
GENE1152X	8099	 CDK2AP1  -  cyclin-dependent kinase 2 associated protein 1	1	-0.05	-0.53	0.34	0.13	0.1	-1.17	-0.45	-0.03	-0.03	0.12	-0.5	-1.13	0.2	0.45	-0.05	0.1	0.42	0.07	0.38		-0.1	-0.29	-1.22	-1.43	-0.39	-0.35	-0.74	-2.68	-2.73	-0.53	-1.37	-0.14	-0.19	0.17	-0.03
GENE956X	125	" ADH1B -  Alcohol dehydrogenase 1B (class I), beta polypeptide"	1	0.49	-0.39	-0.07	0.11	-0.15	-0.57	-1.21	-0.57	-0.37	-0.26	-0.44	-1.1	0.09	0.08	-0.26	-0.24	0.08	-0.05	0.27	-0.49	0.22	-0.01	-2.39	-2.09	0.15	-0.08	-0.96	-1.31	-2.88	-1.7	-2.21	0.71	-0.08	-0.69	-1.57
GENE731X	1265	 CNN2 -  calponin 2	1	0.18	-0.11	-0.15	0.04	0.02	-0.89	-1.36	0.06	-0.32	-0.58	-0.94	-1.28	0.15	-0.24	-0.3	-0.16	-0.27	0.1	0.15	-0.1	0.21	-0.26	-2.27	-2.18	-0.06	-0.57	-0.84	-1.36	-2.63	-1.02	-2.22	0.21	0.08	-0.1	-1.45
GENE1277X	130814	 PQLC3 -  PQ loop repeat containing 3	1	0.28	-0.05	-0.17	-0.02	-0.04	-1.09	-0.98	-0.08	-0.25	-0.61	-0.77	-1.14	-0.04	0.01	-0.33	-0.26	-0.3	-0.1	0.48	0.02	0.21	-0.72	-2.24	-1.63	-0.05	-0.15	-0.64	-0.88	-1.85	-0.6	-1.83	0.22	-0.1	-0.35	-0.6
GENE677X	54985	 HCFC1R1  -  host cell factor C1 regulator 1 (XPO1 dependent)	1	0.4	-0.11	-0.34	0.05	0.02	-1.54	-1.6	-0.2	-0.35	-0.73	-0.71	-1.87	-0.29	-0.67	-0.52	-0.12	-0.15	-0.99	0.31	-0.01	0.18	-0.49	-3	-3.05	-0.15	0.51	-0.5	-1.72	-2.17	-0.98	-2.14	-0.12	-0.61	-0.72	-1.16
GENE1739X	26031	 OSBPL3 -  Oxysterol binding protein-like 3	1	-0.12	-0.09	-0.06	0.14	0.09	-1.24	-0.75	0.11	-0.19	-0.46	-0.87	-1.01	0.04	-0.23	-0.12	-0.03	0.13	-0.43	0.35	-0.31	0.33	-0.2	-1.9	-1.82	0.37	-0.03	-0.3	-1.46	-1.16	-0.31	-1.28	-0.1	0.25	0.02	-0.58
GENE802X	7414	 VCL -  vinculin	1	-0.14	-0.11	0.19	0.08	-0.05	-1.14	-0.36	0.04	-0.25	-0.46	-0.3	-1.32	-0.07	0.19	0.02	-0.03	-0.23	-0.92	-0.03	-0.06	0.06	0.05	-2.69	-2.63	0.23	0.08	-0.44	-2.72	-3.47	-0.8	-1.99	-0.15	0.11	-0.07	-1.53
GENE1464X	81855	 SFXN3 -  Sideroflexin 3	1	-0.38	-0.31	0.31	0.18	0.22	-1	-0.72	0.39	-0.19	0.07	-0.63	-1.15	-0.11	0.14	-0.04	-0.2	-0.21	-0.84	0.17	-0.31	-0.13	0.27	-1.52	-1.88	-0.04	0.16	-0.27	-1.46	-2.26	-0.68	-1.62	0.22	0.08	-0.36	-1.07
GENE1046X	5198	 PFAS -  Phosphoribosylformylglycinamidine synthase	1	0.21	0.34	-0.72	0.05	0.12	-1.14	-1.45	0.09	-0.09	-0.21	-1.51	-2.53	0.06	0.08	0.01	-0.3	-0.27	-1.51	-0.54	0.02	0.47	0.04	-2.14	-2.47	-0.33	-0.59	-1.09	-2.68	-2.75	-1.09	-2.06	0.09	-0.25	-0.06	-1.37
GENE1611X	79672	 FN3KRP -  Fructosamine 3 kinase related protein	1	-0.06	-0.4	0.26	-0.04	0.22	-1.42	-0.76	-0.08	-0.19	-0.46	-1.1	-1.62	-0.25	0.25	-0.33	0.05	0.09	-0.17	0.17	-0.88	0.41	0.29	-1.86	-1.96	-0.05	-0.54	-0.76	-1.59	-1.84	-0.38	-1.04	0.25	0.12	-0.62	-1.52
GENE526X	100	 ADA -  adenosine deaminase	1	0.04	0.09	-0.46	0.15	0.18	-1.9	-2.59	-0.02	0.16	-0.41	-0.87	-2.78	1.2	-0.31	-0.35	-0.3	-0.23	1.05	-0.32	0.29	0.16	-0.13	-2.54	-2.97	-0.06	-0.46	-0.85	-2.41	-2.7	-1.41	-1.45	-0.04	-0.48	-0.63	-0.97
GENE1507X	3033	 HADH -  Hydroxyacyl-Coenzyme A dehydrogenase	1	-0.2	-0.3	-0.14	0.27	0.37	-1.7	-1.78	0.04	0.02	-0.37	-1.12	-1.85	0.39	0.35	-0.37	-0.42	-0.55	-0.18	-0.14	0.41	0.14	-0.4	-1.82	-2.1	-0.27	-0.48	-0.68	-1.82	-1.48	-1.1	-1.64	-0.92	-0.67	-0.78	-0.94
GENE1565X	2319	 FLOT2 -  Flotillin 2	1	-0.17	-0.04	-0.38	0.14	0.44	-1.71	-0.93	0.1	-0.1	-0.3	-0.97	-1.64	0.29	0.2	-0.02	-0.01	-0.04	-0.43	0.2	0.05	-0.29	0.03	-1.79	-1.99	-0.13	-0.76	-0.85	-2.29	-1.38	-0.96	-1.51	-1.34	-0.72	-0.7	-0.72
GENE1032X	55266	 TMEM19 -  transmembrane protein 19	1	-0.35	-0.06	-0.16	0.19	0.35	-1.68	-1.15	0.29	0.1	-0.3	-1.16	-2.72	0.73	0.74	-0.03	-0.01	0.08	-0.19	-0.13	0.57	-0.17	-0.05	-2.6	-3.01	-0.93	-0.64	-0.81	-2.85	-2.9	-0.94	-1.13	-0.52	-0.62	-0.68	-1.08
GENE1030X	2946	 GSTM2 -  Glutathione S-transferase mu 2 (muscle)	1	-0.15	-0.17	0.15	-0.17	0.28	-0.82	-0.94	0.04	-0.03	-0.04	-0.34	-1.46	0.15	0.14	0.07	0.1	0.2	-0.54	-0.46	-0.08	-0.28	0.82	-1.28	-2.1	-0.14	-0.54	-0.72	-1.87	-1.74	-0.59	-1.38	-0.51	-0.69	-0.62	-0.59
GENE875X	2948	 GSTM4 -  Glutathione S-transferase mu 4	1	0	0.02	0.17	-0.19	0.02	-1.04	-1.06	-0.14	-0.26	-0.14	-0.33	-1.64	0.08	0.27	-0.09	-0.13	-0.2	-0.24	-0.17	-0.35	-0.31	0.83	-1.68	-2.44	0.06	-0.69	-0.86	-1.77	-2.34	-0.88	-1.5	-0.51	-0.69	-0.8	-0.85
GENE53X	55819	 RNF130 -  Ring finger protein 130	1	-0.34	-0.6	0.08	0.22	0.62	-0.6	-1.43	0.3	-0.32	0.1	-0.73	-2.19	0.54	0.2	-0.18	-0.32	0.3	-0.44	-0.13	0.47	-0.21	-0.14	-0.95	-1.78	-0.39	-0.91	-0.41	-1.9	-1.88		-1.32	-0.93	-0.94	-0.75	-0.67
GENE1768X	7205	 TRIP6 -  Thyroid hormone receptor interactor 6	1	-0.34	-0.27	0.15	0.25	0.23	-0.59	-0.6	-0.28	-0.48	-0.46	-0.74	-1.66	0	-0.08	-0.25	-0.3	0.54	-0.68	-0.49	0.3	0.04	0.14	-1.92	-2.4	0.22	-0.12	-0.38	-2.42	-2.22	-0.84	-0.87	0.18	-0.31	-0.05	-0.62
GENE873X	11130	 ZWINT -  ZW10 interactor	1	-0.21	-0.05	0	0.1	0.16	-1.76	-0.56	0.03	-0.02	-0.36	-0.75	-0.85	0.18	-0.08	0.22	0.13	0.6	0.02	0.06	-0.14	0.05	0.04	-2.83	-2.88	0.22	-0.25	-0.64	-1.39	-3.62	-0.16	-0.63	0.14	-0.37	-0.37	-0.43
GENE54X	6612	 SUMO3 -  SMT3 suppressor of mif two 3 homolog 3 (S. cerevisiae)	1	-0.02	-0.09	-0.22	-0.12	0.43	-1.42	-0.66	0.26	0.31	-0.13	-1.15	-1.39	-0.01	-0.25	0.21	0.29	0.62	-0.52	0.32	0.38	0.06	-0.76	-2.46	-1.96	0.41	-0.41	-0.61	-2.13		-0.16	-0.86	0.08	-0.74	-0.23	-0.4
GENE849X	7123	" CLEC3B -  C-type lectin domain family 3, member B"	1	-0.27	-0.06	0.05	0.01	0.28	-1.15	-0.82	-0.2	-0.12	-0.45	-1.03	-1.47	-0.03	-0.27	-0.14	0.46	-0.07	-1.2	0.23	0.29	0.31	-0.71	-1.64	-1.37	-0.07	-0.77	-0.77	-1.4	-2.35	-0.78	-1.67	-0.31	-0.44	-0.47	-0.61
GENE55X	60672	 MIIP -  Migration and invasion inhibitory protein	1	-0.02	-0.22	0	0.16	0.09	-1	-0.95	0.21	-0.32	-0.28	-0.88	-1.52	0.11	-0.51	-0.27	-0.15	-0.19	-0.1	0.88	-0.05	0.09	-0.92	-2.23	-2.08	-0.05	-0.5	-0.47	-1.46		-0.68	-1.23	-0.08	-0.55	-0.57	-0.05
GENE755X	23463	 ICMT -  Isoprenylcysteine carboxyl methyltransferase	1	0.23	-0.26	-0.34	0.19	0.16	-0.95	-0.31	-0.29	-0.56	-1.08	-1.48	-1.94	0.44	0.19	-0.62	-0.17	-0.38	-0.33	0.63	0.13	-0.02	-0.74	-2.62	-2.28		-0.57	-0.92	-1.56	-1.77	-0.58	-2.24	-0.3	-0.59	-0.55	-0.94
GENE56X	4174	 MCM5 -  Minichromosome maintenance complex component 5	1	-0.06	0.17	-0.38	0.3	-0.01	-0.96	-0.28	-0.18	-0.25	-0.55	-0.52	-0.78	-0.1	-0.26	-0.24	-0.07	0.1	-0.21	0.22	0.06	-0.17	-0.1	-2.44	-1.77	0.09	-0.71	-0.86	-1.56		-0.94	-0.81	-0.58	-0.1	-0.73	-0.74
GENE422X	404672	" GTF2H5 -  General transcription factor IIH, polypeptide 5"	1	-0.09	0.04	-0.49	0.35	0.19	-1.27	-0.23	0.15	-0.14	-0.12	-0.73	-1.85	0	-0.07	0.01	0.02	0.05	-1.01		0.33	0.08	-0.4	-2.52	-1.08	0.56	-0.38	-0.63	-1.62	-1.61	-1.33	-1.54	-0.18	-0.36	-0.08	-0.49
GENE531X	25906	 C11orf51 -  Chromosome 11 open reading frame 51	1	-0.18	-0.18	-0.12	0.46	0.03	-1.11	-1.05	-0.43	-0.08	0.06	-0.58	-1.86	-0.01	-0.19	-0.1	-0.09	0.18	-1.18	-0.18	0.51	-0.1	-0.24	-0.64	-0.87	-0.11	-0.26	-0.62	-0.92	-2.39	-0.61	-1.36	0.27	-0.02	0.04	-0.67
GENE452X	79033	 ERI3 -  ERI1 exoribonuclease family member 3	1	-0.12	0.24	-0.75	0.55	0.1	-1.46	-0.86	-0.2	-0.05	-0.08	-0.58	-1.25	-0.07	-0.12	-0.12	-0.5	0.29	-1.08	-0.2	0.14	-0.36	0.42	-0.38	-0.86	0.08	-0.16	-0.29	-1.52	-2.3	-0.82	-1.76	-0.13	-0.21	-0.11	-0.96
GENE1113X	64598	 MOSPD3 -  Motile sperm domain containing 3	1	-0.12	-0.07	-0.01	0.09	0.13	-0.93	-0.33	-0.32	0.02	-0.29	-0.29	-0.71	0.16	0.35	-0.04	-0.28	0.44	-0.54	-0.31	0.5	-0.09	-0.1	-0.87	-0.6	-0.12	-0.28	-1.06	-1.36	-2.27	-0.9	-1.59	0.19	-0.34	-0.03	-0.89
GENE1196X	9380	 GRHPR -  Glyoxylate reductase/hydroxypyruvate reductase	1	-0.34	0.43	-0.16	-0.05	0.1	-1.36	-0.87	-0.64	-0.32	-0.48	-1.04	-0.97	0.06	-0.16	-0.26	-0.08	0.01	-0.69	0	0.25	0.19	-0.43	-0.95	-0.42	0.1	-0.73	-0.91	-2.06	-2.49	-1.72	-1.96	0.31	-0.36	0.14	-0.8
GENE1753X	84545	 MRPL43 -  Mitochondrial ribosomal protein L43	1	-0.29	0.02	-0.01	0.15	0.14	-0.82	-0.32	-0.15	-0.23	-0.17	-0.83	-1.06	-0.32	-0.25	-0.5	-0.47	-0.15	-1.01	0.09	-0.09	-0.09	0.09	-1.1	-0.56	-0.39	-0.58	-0.61	-2.07	-1.88	-1.17	-1.58	-0.06	-0.27	-0.33	-1.18
GENE47X	2224	" FDPS -  Farnesyl diphosphate synthase (farnesyl pyrophosphate synthetase, dimethylallyltranstransferase, geranyltranstransferase)"	1	-0.07	0.25	-0.17	0.08	-0.08	-1.08	-1.03	-0.29	-0.14	-0.89	-1.33	-1.32	-0.57	-0.35	-0.31	-1	-0.64	-1.87	-0.66	0.04	0.73	-0.12	-1.16		0.42	-0.52	-0.84	-2.08	-2.78	-1.35	-2.69	0.09	-0.53	-0.41	-1.46
GENE1657X	9555	" H2AFY -  H2A histone family, member Y"	1			-0.33	0.15	0.19	-1.17	-1.36	-0.13	0.29	0.23	-1.03	-1.42	0.29	-0.08	0.14	0.02	0.22	-1.28	0.19	-0.87	0.63	0.04	-1.05	-0.5	0.2	-0.28	-0.92	-2.29	-2.25	-1.35	-1.33	0.47	-0.01	0.54	-0.6
GENE673X	51631	 LUC7L2 -  LUC7-like 2 (S. cerevisiae)	1	-0.01	0.26	-0.44	0.32	-0.12	-0.87	-0.78	0.19	-0.21	-0.08	-0.85	-2.56	0.12	-0.23	-0.27	-0.48	-0.15	-2.15	0.07	-0.82	0.71	0.04	-0.59	-0.07	0.4	-0.42	-1.2	-2.32	-2.63	-0.74	-1.52	0.33	0.16	-0.01	-0.71
GENE959X	4701	" NDUFA7 -  NADH dehydrogenase (ubiquinone) 1 alpha subcomplex, 7, 14.5kDa"	1	0.26	0.15	-0.45	0.07	-0.03	-1.16	-0.76	-0.3	-0.15	-0.01	-0.82	-1.66	-0.05	-0.67	-0.49	-0.32	-0.29	-1.78	-0.07	-0.56	0.36	0.28	-0.6	-0.59	0.28	-0.91	-1.09	-2.03	-2.7	-1.27	-1.09	0.91	-0.6	-0.01	-0.44
GENE1537X	3835	 KIF22  -  Kinesin family member 22	1	-0.23	0.15	0.19	0.04	-0.14	-1.11	-0.59	-0.16	-0.47	-0.16	-1.14	-1.5	-0.33	-0.63	-0.28	-0.45	-0.27	-1.43	0.22	-0.71	0.39	0.09	-1.12	-1.03	0.16	-0.36	-0.8	-1.77	-2.22	-0.69	-1.04	0.6	-0.03	-0.11	-0.93
GENE1518X	9551	" ATP5J2 -  ATP synthase, H+ transporting, mitochondrial F0 complex, subunit F2"	1	-0.17	-0.01	-0.06	0.12	0.13	-0.59	-0.61	0.03	-0.1	-0.17	-0.88	-1.6	-0.35	-0.29	-0.18	-0.14	-0.09	-2.27	-0.04	-0.65	0.48	0.21	-0.79	-1.21	0.25	-0.49	-0.49	-1.94	-3.22	-0.27	-0.51	0.37	0.05	0.14	-0.55
GENE754X	4709	" NDUFB3 -  NADH dehydrogenase (ubiquinone) 1 beta subcomplex, 3, 12kDa"	1	0.18	0	-0.62	-0.12	0.57	-1.05	-0.45	-0.26	-0.15	-0.21	-1.36	-1.97	-0.4	-0.12	-0.52	-0.32	-0.36	-2.45	0.12	-0.03	0.23	-0.33	-1.28	-1.37	-0.29	-0.66	-1.27	-2.83	-3.61	-0.68	-0.48	0.2	-0.38	-0.04	-1.26
GENE1443X	1622	" DBI -  Diazepam binding inhibitor (GABA receptor modulator, acyl-Coenzyme A binding protein)"	1	-0.3	-0.24	-0.19	0.35	0.38	-0.92	-0.82	-0.06	0.02	-0.09	-0.27	-0.93	0.08	0.46	-0.02	-0.26	-0.08	-1.3	0.12	0.14	0.04	-0.29	-0.1	-1.01	-0.14	0.22	-0.17	-1.83	-2.31	-0.29	-0.15	-0.08	0.13	0.11	0.1
GENE1587X	3281	 HSBP1 -  Heat shock factor binding protein 1	1	-0.28	-0.24	0.05	0.15	0.32	-0.37	-0.38	-0.12	0.1	0.18	-0.18	-0.82	0.3	0.07	-0.36	-0.11	0.18	-2.08	0.09	0.57	-0.07	-0.59	-0.8	-1.49	-0.09	-0.15	-0.23	-2.59	-3.21	-0.75	-0.92	0.03	-0.01	-0.06	-0.57
GENE441X	284184	 C17orf89 -  Chromosome 17 open reading frame 89	1	-0.43	-0.08	0.01	0.09	0.39	-1.13	-0.83	-0.01	-0.01	0	-0.68	-2.16	-0.16	-0.19		-0.93	-0.02	-2.24	-0.1	0.52	-0.23	-0.2	-1.16	-2.05	-0.39	-0.28	-0.51	-2.74	-3.47	-1.18	-1.88	-0.4	-0.45	-0.8	-0.17
GENE950X	8751	 ADAM15 -  ADAM metallopeptidase domain 15	1	-0.48	-0.55	0.46	0.35	0.23	-0.81	-0.69	-0.14	-0.1	0.34	-0.36	-1.46	0.14	0.05	-0.81	-0.17	0.19	-1.32	-0.08	0.74	0.08	-0.73	-0.7	-1.04	-0.32	-0.22	0.14	-1.92	-1.94	-0.52	-0.03	-0.46	-0.33	0.03	-0.36
GENE827X	10227	 MFSD10 -  Major facilitator superfamily domain containing 10	1	-0.29	-0.52	0.31	0.14	0.35	-0.54	-0.41	-0.4	-0.11	0.2	-0.4	-1.61	0.23	0.06	-0.29	-0.2	0.39	-0.92	0.02	0.67	-0.17	-0.52	-0.65	-0.77	-0.26	-0.3	-0.18	-2	-2.36	-1.12	-0.07	-0.2	-0.53	-0.14	-0.72
GENE1165X	27173	" SLC39A1  -  solute carrier family 39 (zinc transporter), member 1"	1	0.24	-0.54	0.2	0.11	-0.03	-0.8	-0.47	-0.1	-0.29	0.09	-0.78	-1.62	0.31	0.02	-0.41	0.15	0.36	-0.74	0.12	0.42	0.03	-0.57	-0.87	-0.88	-0.39	-0.47	-0.57	-2.63	-2.34	-0.84	-0.35	-0.17	-0.34		-0.49
GENE1035X	57150	 C6orf162 -  Chromosome 6 open reading frame 162	1	-0.22	-0.17	0.14	0.07	0.24	-0.73	-0.44	0.04	-0.01	-0.38	-0.93	-1.83	0.41	-0.03	0.07	0.01	-0.23	-1.18	0.12	0.4	-0.41	-0.12	-0.47	-0.74	-0.52	-0.28	-0.47	-2.38	-2.04	-0.94	-0.51	-0.94	-0.73	-0.7	-1.05
GENE46X	54460	 MRPS21 -  Mitochondrial ribosomal protein S21	1	-0.18	-0.18	0.03		0.32	-0.69	-0.32	0.03	-0.01	-0.32	-1.11	-1.65	0	-0.52	-0.6	-0.4	-0.5	-1.52	-0.17		0.03	0.15		-0.58	-0.45	-0.38	-0.44	-2.18	-2.23	-1.13	-0.78	-0.24	-0.9	-0.96	-0.65
GENE1563X	29934	 SNX12 -  Sorting nexin 12	1	-0.17	-0.51	0.06	0.31	0.31	-0.47	-0.58	-0.12	0.2	-0.71	-1.35	-1.31	0.19	-0.09	-0.54	-0.25	-0.17	-0.67	0.24	-0.12	0.34	-0.35	-1.07	-0.8	-0.42	-0.41	-0.66	-1.78	-2.27	-1.13	-1.09	-0.48	-0.51	-0.74	-0.62
GENE1407X	9797	 TATDN2 -  TatD DNase domain containing 2	1	-0.23	-0.23	0.06	0.01	0.38	-0.92	-0.84	-0.19	0.19	-0.38	-0.83	-1.41	0.24	0.03	-0.54	-0.46	0.34	-0.64	0.12	0.22	-0.2	-0.15	-0.48	-0.8	-0.65	-0.15	-0.5	-1.78	-2.28	-0.79	-1.07	-0.48	-0.46	-0.42	-0.43
GENE1705X	23259	 DDHD2 -  DDHD domain containing 2	1	-0.37	-0.09	-0.15	0.26	0.35	-0.8	-0.68	0.11	0.22	-0.03	-0.86	-1.53	-0.24	-0.24	-0.79	-0.35	0	-0.82	0.05	0.48	-0.27	-0.26	-0.94	-1.08	-0.54	-0.75	-0.45	-2.05	-1.92	-1.26	-1.08	-0.97	-0.18	-0.78	-0.84
GENE1754X	25828	 TXN2 -  Thioredoxin 2	1	-0.45	-0.08	0.22	0.08	0.22	-1.2	-0.79	-0.45	-0.3	-0.56	-1.18	-1.7	-0.22	-0.28	-0.7	-0.65	-0.32	-0.88	0.06	0.57	-0.41	-0.22	-0.52	-0.63	0.16	-0.68	-0.75	-2.38	-2.47	-1.49	-1.68	-0.33	-0.72	-0.99	-0.76
GENE751X	5303	" PIN4 -  protein (peptidylprolyl cis/trans isomerase) NIMA-interacting, 4 (parvulin)"	1	-0.77	-0.23	0.07	0.03	0.88	-0.51	0.11	-0.17			-0.43	-1.4	-0.06	-0.35	-0.65	-0.3	-0.5	-1.55	0.12	0.76	-0.22	-0.67	-0.88	-0.46	-0.29	-0.56	-0.85	-2.94	-3.15	-1.67	-0.93	-0.22	-0.93	-0.95	-0.55
GENE45X	129049	 SGSM1 -  Small G protein signaling modulator 1	1	-0.17	-0.42	-0.08	0.27	0.41	-0.29	-0.52	-0.05	-0.12	0.14	-0.61	-0.93	0.09	-0.39	-0.17	-0.03	-0.34	-1.77	0.08	0.4	-0.16	-0.33	-0.78		-0.56	-0.49	-0.31	-2.04		-0.71	-1	0.42	-0.83	-0.31	-0.46
GENE1303X	83876	 MRO -  Maestro	1	-0.03	-0.59	-0.23	0.27	0.58	-0.36	-0.34	-0.07	-0.14	0.45	-0.65	-1.04	-0.1	-0.52	-0.69	0.52	-0.17	-1.74	0.2	0.03	-0.1	-0.12	-0.81	-1.31	-0.81	-0.86	-0.88	-2.08	-2.62	-0.89	-0.8	-0.08	-0.52	-0.01	-0.38
GENE374X	93974	" ATPIF1 -  Transcribed locus, strongly similar to NP_057395.1 ATPase inhibitor, mitochondrial isoform 1 precursor [Homo sapiens]"	1	-0.16	-0.57	0.01	0.37	0.36	-1.6	0	0.06	-0.1	-0.03	-1.15	-1.91	0.12	0.04	-0.25	-0.13	-0.14	-1.5	0.37	-0.01	-0.19	-0.16	-0.77	-1.01	-0.26	-0.07	-0.46	-1.68	-2.63	-0.72	-1.55	0.13	-0.53	-0.19	-1
GENE984X	11243	 PMF1 -  Polyamine-modulated factor 1	1	-0.56	-0.09	0.15	0.2	0.3	-0.92	-1.03	-0.11	-0.07	-0.47	-0.83	-2	-0.4	-1.03	-0.82	-1.02	-0.32	-1.61		0.3	-0.33	0.03	-1.08	-0.92	0.36	-1.01	-0.56	-2.08	-3.15	-1.3	-1.24	-0.39	-1.26	-0.45	-0.58
GENE853X	56655	" POLE4 -  Polymerase (DNA-directed), epsilon 4 (p12 subunit)"	1	-0.24	-0.04	-0.12	0.06	0.34	-0.25	0.68	-0.35	0.01	-0.05	-1.3	-0.83	-0.3	-0.2	-0.06	-0.33	0.2	-2.27	0	0.51	-0.02	-0.5	-1.24	-1.11	0.12	-0.47	-0.8	-2.55	-2.94	-0.87	-1.32	0.02	-0.44	-0.27	-0.76
GENE1698X	27258	" LSM3 -  LSM3 homolog, U6 small nuclear RNA associated (S. cerevisiae)"	1	-0.12	-0.2	-0.09	0.05	0.37	-0.25	0.27	0.07	0.09	0.11	-0.37	-0.51	0.07	-0.11	-0.36	-0.18	-0.06	-0.93	0.14	-0.32	0.35	-0.17	-0.61	-0.45	-0.16	-0.12	-0.64	-1.6	-2.19	-0.41	-0.65	0.37	0.18	-0.31	-0.38
GENE1816X	6390	" SDHB -  Succinate dehydrogenase complex, subunit B, iron sulfur (Ip)"	1	-0.28	-0.07	-0.04	0.16	0.21	-0.48	-0.54	-0.02	-0.15	-0.37	-0.26	-0.69	0.05	0.06	-0.27	-0.75	-0.25	-1.1	0.12	-0.11	-0.1	0.08	-0.8	-0.32	0.11	-0.59	-0.87	-2.07	-1.92	-1.15	-1.07	-0.62	-0.26	-0.14	-0.55
GENE629X	23344	 ESYT1 -  Extended synaptotagmin-like protein 1	1	-0.98	-0.24	0.17	0.32	0.74	-1.57	-0.92	0.18	-0.1	-0.4	-1.22	-1.36	-0.01	0.5	-0.61	-0.8	-0.17	-1	-0.5	0.25	0.22	0.03	-1.04	-0.23	-0.01	-1.3	-0.56	-2.1	-2.1	-1.06	-1.98	-0.4	-0.44	-0.85	-0.8
GENE1508X	6904	 TBCD -  Tubulin folding cofactor D	1	-0.9	-0.02	0.22	0.25	0.44	-1.41	-1.21	-0.09	-0.21	-0.44	-0.94	-1.68	-0.23	0	-0.79	-0.95	-0.47	-0.62	-0.42	0.57	-0.19	0.03	-0.74	-1.09	-0.06	-0.97	-0.65	-1.86	-1.91	-1.05	-1.25	0.2	-0.46	-0.76	-0.6
GENE823X	84134	 TOMM40L -  Translocase of outer mitochondrial membrane 40 homolog (yeast)-like	1	-0.78	-0.04	0.24	0.15	0.43	-2.25	-0.84	0	-0.72		-1.58	-2.3	-0.33	-0.28	-0.16	-0.95	-0.69	-1.53	-0.04	0.64	-0.28	-0.31	-1.14	-1.05	0.01	-0.86	-1.01	-2.09	-2.55	-0.76	-0.81	-0.31	-0.97	-0.86	-1.07
GENE688X	6576	" SLC25A1  -  solute carrier family 25 (mitochondrial carrier; citrate transporter), member 1"	1	-0.49	-0.15	0.26	0.45	-0.06	-1	-1.19	-0.12	-0.23	-1.01	-0.73	-2.59	-0.66	-0.33	-1.19	-1.39	-0.88	-1.37	-0.51	0.49	-0.21	0.24	-2.05	-2.14	-0.08	-1.1	0.14	-2.49	-3.84	-0.47	-0.92	-0.39	-0.58	-0.49	-0.62
GENE258X	81839	" VANGL1 -  Vang-like 1 (van gogh, Drosophila)"	1	-0.43	-0.01	0.69	-0.35	0.1	-0.84	-0.55	-0.21	-0.29	-0.45	-0.72	-1.72	-0.07	0.1	-0.84	-0.34	-0.17	-0.79	-0.82	0.54	0.38	-0.09	-1.54	-0.73	0.08	-0.48	-0.39	-2.46	-3.4	0.02	-0.53	0.46	0.03	-0.8	-0.56
GENE667X	81552	" VOPP1 -  Vesicular, overexpressed in cancer, prosurvival protein 1"	1	-0.71	-0.22	0.27	0.08	0.57	-2.49	-1.76	0.08	-0.12	0.25	-1.15	-3.55	0.28	0.17	-1.01	0.22	0.63	0.12	0.06	0.95	-0.22	-0.78	-1.5	-2.1	-0.46	-0.71	-0.42	-2.85	-3.12	-1.16	-1.5	-0.32	0.28	-0.72	-0.12
GENE618X	11079	 RER1  -  RER1 retention in endoplasmic reticulum 1 homolog (S. cerevisiae)	1	-0.14	-0.09	-0.5	0.46	0.26	-2.18	-2.83	-0.18	-0.03	0.22	-0.88	-3.02	0.26	0.11	-0.72	-0.2	0.31	0.2	-1.06	1.19	0.02	-0.16	-0.54	-2.16	0.12	-0.6	-1.11	-2.36	-3.26	-0.31	0.01	-1.27	-1.31	-0.36	-0.33
GENE687X	2896	 GRN -  Granulin	1	-0.17	-0.89	0.14	0.54	0.39	-1.89	-2.4	0.01	0.26	0.31	-0.41	-2.93	0.52	0.21	-0.35	-0.27	0.22	0.21	-1.05	0.08	0.49	-0.04	-0.58	-1.69	-0.09	-0.32	-0.43	-2.06	-2.86	0.12	0.32	-0.82	-0.3	-0.55	-0.23
GENE1024X	7077	 TIMP2 -  TIMP metallopeptidase inhibitor 2	1	-0.21	-0.21	-0.14	0.36	0.19	-1.61	-1.55	-0.13	-0.06	-0.01	-0.7	-2.62	0.05	-0.1	-0.38	-0.08	0.14	-0.02	0.09	0.02	-0.19	0.09	-0.73	-1.91	0.13	-0.23	-0.51	-1.44	-2.57	0.02	-0.25	-0.38	-0.25	-0.35	-0.25
GENE760X	6342	 SCP2 -  Sterol carrier protein 2	1	-0.31		0.03	0.18	0.09	-1.07	-1.23	0.15	0.15	-0.05	-0.87	-1.74	0.05	0.69	0.33	-0.1	0.4	0.54	0.24	-0.34	-0.07	0.17	-0.39	-0.98	0.17	0.32	-0.22	-0.74	-2.19	0.1	-0.4	0.27	0.55	-0.03	0.04
GENE185X	6678	" SPARC -  Secreted protein, acidic, cysteine-rich (osteonectin)"	1	-0.47	-0.1	0.23	0.32	-0.04	-1.97	-3.01	-0.35	-0.38	-0.33	-1.01	-2.25	1.06	2.1	0.34	0.16	0.09	0.99		0.04	-0.04		-0.17	-1.98		0.31	-0.05	-1.36	-3.92	0.44	-0.31	0.2	0.31	0.32	0.19
GENE1580X	975	 CD81 -  CD81 molecule	1	-0.13	-0.22	-0.12	0.12	0.35	-1.33	-1.63	0.17	-0.06	-0.04	-0.52	-1.35	0.8	0.41	-0.05	0.34	0.62	0.42	0.13	-0.1	0.52	-0.57	-0.09	-0.92	0.4	0.15	-0.08	-1.05	-2.09	0.35	0.42	0.15	0.34	0.99	0.4
GENE284X	822	" CAPG -  Capping protein (actin filament), gelsolin-like"	1	-0.57	-0.55	0.5	0.63	0.01	-0.74	-1.71	-0.01	0.17	0.16	-0.86	-1.99	0.35	0.46	0	-0.48	0.2	0.15		-0.5	0.24	0.26	-0.04	-1.07	-0.2	-0.05	-0.16	-0.64	-2.26	0.51	0.06	0.23	-0.05	-0.53	-0.44
GENE8X	2592	 GALT -  Galactose-1-phosphate uridylyltransferase	1	-0.25	0.04	-0.26	0.32	0.16	-1.61	-1.69	-0.35	-0.49	-0.75	-1.17		0	0.56	-0.17	-0.76	-0.52	-0.16	-0.13	-0.3	0.02	0.4	-1	-1.83	0.13	0.03	-0.35	-1.26	-2.33	-0.4	-0.58	0.51	0.18	-0.55	0.07
GENE1184X	48	" ACO1 -  aconitase 1, soluble"	1	-0.21	-0.05	0.04	0.09	0.14	-1.42	-1.37	-0.02	-0.2	-0.38	-1.35	-1.66	0.64	0.8	-0.62	-0.38	-0.26	0.31	-0.64	0.33	0.06	0.26	-0.76	-1.05	-0.03	-0.15	-0.41	-1.23	-2.02	-0.98	-2.02	-0.19	-0.12	-0.59	-0.44
GENE1528X	1389	 CREBL2 -  CAMP responsive element binding protein-like 2	1	0.29	0.25	-0.81	0.08	0.19	-1.99	-1.25	-0.26	0.14	-0.67	-2.37	-1.75	0.94	0.37	0.18	0.28	-0.23	0.14	-0.24	-0.76	0.75	0.25	-1.04	-0.9	-0.18	-0.93	-1.26	-1.74	-2.34	-1.21	-1.74	0.04	-0.1	-0.02	0.2
GENE5X	220002	" CYBASC3 -  Cytochrome b, ascorbate dependent 3"	1	0.14	0.57	-0.64		-0.08	-3.19	-3.21	-0.73	0.05	-0.52	-2	-2.75	0.8	0.32	0.05	-0.34	0.38	-0.12	-0.53		0.14	0.39		-1.91	-0.19	-1.32	-2.04	-2.56	-3.33	-1.99	-2.03	-0.6	-1.02	-0.83	-0.26
GENE577X	23201	" FAM168A -  Family with sequence similarity 168, member A"	1	0.08	-0.1	0.15	0.04	-0.18	-1.74	-1.36	0.05	-0.23	-0.01	-1.66	-2.5	0.38	-0.12	0.15	-0.48	0.18	0.29	0.11	-0.79	0.19	0.5	-0.73	-0.96	0.17	-0.46	-0.26	-1.17	-2.45	-0.52	-1.93	0.54	0.4	-0.61	-1.15
GENE1548X	285203	 C3orf64 -  Transcribed locus	1	-0.12	-0.02	-0.24	0.11	0.26	-1.59	-1.46	0.06	0.28	-0.16	-1.12	-1.3	0.8	0.57	-0.02	0.03	0.08	0.81	-0.21	0.03	-0.12	0.31	-0.28	-0.47	0.53	0.06	-0.27	-1.74	-1.21	-0.43	-0.71	0.16	-0.13	-0.11	-0.71
GENE1450X	202	 AIM1 -  Absent in melanoma 1	1	-0.26	-0.06	0.01	0.25	0.05	-1.95	-1.69	0.02	-0.33	-0.59	-1.54	-2.33	0.51	0.39	0.03	-0.19	0.19	-0.11	-0.2	-0.35	0.03	0.51	-1.67	-1.22	0.32	0.08	-0.48	-1.94	-2.32	-0.42	-0.84	0.19	0.06	-0.23	-1.48
GENE645X	2970	" GTF2IP1  -  general transcription factor IIi, pseudogene 1"	1	-0.07	0.42	-0.45	0.39	0.08	-2.43	-1.43	0.37	0.04	-0.51	-1.82	-2.89	1.05	0.81	0.13	-0.3	-0.21	0.41	-0.87	-0.38	0.53	0.09	-1.82	-1.61	0.5	-0.2	-0.92	-1.41	-2.86	-0.66	-1.19	0.14	-0.46	-0.3	-1.08
GENE938X	2970	" GTF2IP1 -  General transcription factor IIi, pseudogene 1"	1	-0.07	0.42	-0.45	0.39	0.08	-2.43	-1.43	0.37	0.04	-0.51	-1.82	-2.89	1.05	0.81	0.13	-0.3	-0.21	0.41	-0.87	-0.38	0.53	0.09	-1.82	-1.61	0.5	-0.2	-0.92	-1.41	-2.86	-0.66	-1.19	0.14	-0.46	-0.3	-1.08
GENE10X	80017	 C14orf159 -  Chromosome 14 open reading frame 159	1	0	-0.01	-0.93	0.55	0.39	-2.68	-0.84	0.27	0.1	-0.06	-2.06	-2.9	0.7	1.16	0.16	-0.02	-0.09	0.47	0.06	-0.48	-0.12	0.53	-0.96		0.24	-0.05	-0.68	-1.44	-2.44	0.26	0.46	-0.01	-0.1	-0.45	-0.68
GENE1495X	4179	" CD46 -  CD46 molecule, complement regulatory protein"	1	-0.43	-0.06	0.16	0.2	0.11	-1.11	-0.76	0.39	0.19	-0.21	-1.26	-1.85	0.33	0.6	0.1	-0.25	0.15	0.51	-0.22	-0.38	0.38	0.21	0.01	-0.85	-0.08	0.16	-0.52	-0.66	-1.74	-0.08	0.21	0.24	-0.01	-0.26	-0.3
GENE412X	54664	 TMEM106B -  Transmembrane protein 106B	1	-0.13	0.12	0.21	-0.11	-0.08	-0.97	-0.44	0.02	0.06	-0.41	-0.88	-1.78	0.58	0.51	-0.17	-0.05	-0.08	0.24	0.08	0.1	-0.38	0.11	-0.05	-0.79	-0.23	-0.06	-0.57	-1.12	-2.3	-0.29	-0.52	-0.6	-0.22	-0.32	-0.46
GENE784X	5910	" RAP1GDS1 -  RAP1, GTP-GDP dissociation stimulator 1"	1	-0.33	0.01	0	0.2	0.12	-1	-0.44	0.06	-0.17	-0.23	-0.69	-1.63	0.48	0.39	0.21	-0.27	-0.28	-0.35	-0.11	0.43	-0.19	-0.12	-0.1	-0.77	-0.19	-0.18	-0.59	-1.1	-1.69	-0.2	-0.91	-0.02	-0.23	-0.08	-0.69
GENE302X	133418	 EMB -  Embigin homolog (mouse)	1	-0.26	-0.01	0.01	0.07	0.21	-1.03	-0.75	-0.22	0.18	-0.28	-0.85	-1.79	-0.37	-0.19	0.08	0.07	0.05	-0.86	-0.16	0.28	-0.2	0.15	0.01	-1.37	-0.18	0.02	-0.35	-0.84	-2.42	-0.16	-0.62	0.08	-0.28	-0.02	0.31
GENE581X	2790	" GNG10 -  Guanine nucleotide binding protein (G protein), gamma 10"	1	-0.24	-0.17	-0.29	0.35	0.36	-1.06	-1.77	-0.1	-0.08	-0.27	-1.15	-2.23	-0.14	0.13	0.2	0.03	-0.22	-0.81	0.03	-0.34	0.33	-0.02	-0.21	-0.79	0.4	0.28	-0.23	-0.89	-1.57	-0.02	-0.87	-0.34	-0.15	0.18	-0.1
GENE1354X	5434	" POLR2E -  Polymerase (RNA) II (DNA directed) polypeptide E, 25kDa"	1	-0.35		0.09	0.31	-0.05	-0.99	-1.01	-0.81	-0.44	-0.2	-1.09	-1.66	-0.5	-0.81	-0.17	-0.47	-0.08	-0.67	0.29	-0.05	-0.22	-0.01	-1.23	-0.99	0.01	-0.14	-0.47	-0.67	-1.65	0.01	-0.88	-0.05	-0.2	-0.6	-0.6
GENE218X	7114	" TMSB4X -  Thymosin beta 4, X-linked"	1	-0.1	-0.12	-0.15	0.25	0.13	-1.71	-2.6	-0.09	-0.06	-0.09	-0.9	-3.04	-0.07	0.41	-0.04	-0.08	-0.17	-2.07	0.56	0.03	-0.12	-0.46	-2.44	-2.27	0.21	-0.28	-0.44	-1.43	-3.44	0.56	0.1	-0.14	-0.43	-0.2	-0.63
GENE1361X	9087	" TMSB4Y -  Thymosin beta 4, Y-linked"	1	-0.26	-0.16	-0.1	0.14	0.4	-1.78	-1.88	0.05	0.22	0.47	-0.82	-2.85	-0.04	-0.07	-1	-0.09	-0.08	-2.2	0.46	-0.37	-0.07	-0.02	-1.25	-2.12	0.19	-0.09	-0.08	-2.65	-2.93	-0.47	0.08	0.51		0.01	-0.44
GENE1197X	25864	 LOC100289334 -  Hypothetical protein LOC100289334	1	0.05	-0.17	0.19	-0.07	0	-1.4	-0.9	-0.33	-0.34	-0.25	-0.66	-1.87	-0.51	0.02	-0.21	-0.54	-0.21	-0.54	0.44	-0.67	0.09	0.14	-0.41	-1.46	0.04	-0.16	-0.42	-1.14	-1.83	-0.08	-0.29	0.16	-0.05	-0.86	-0.28
GENE193X	10682	 EBP -  Emopamil binding protein (sterol isomerase)	1	-0.34	-0.23	0.36	0.16	0.03	-1.82	-0.92	-0.26	-0.07	-0.17	-1.01	-2.34	-1.14	-0.42	0.12	-0.2	-0.23	-1.88	-0.14	0.11	-0.27	0.31	-1.03	-2.52	0.06		-0.31	-1.52	-2.45	-0.37	-1.26	0.18	-0.18	-0.31	-0.75
GENE837X	4707	" NDUFB1 -  NADH dehydrogenase (ubiquinone) 1 beta subcomplex, 1, 7kDa"	1	-0.46	-0.21	0.31	0.23	0.13	-1.48	-0.98	0.07	-0.27	-0.11	-1.3	-2.7	-0.53	-0.19	-0.17	-0.77	-0.55	-1.82	-0.03	-0.46	-0.11	0.37	-0.53	-0.47	0.24	0.65	-0.2	-0.89	-2.04	0.45	-0.14	0.58	-0.07	-0.31	-0.55
GENE979X	5201	 PFDN1 -  Prefoldin subunit 1	1	-0.36	-0.17	0.32	0.16	0.03	-0.91	-0.66	0.1	0.02	0.02	-1.24	-1.78	-0.67	-0.35	0.25	-0.12	-0.22	-1.63	0.01	-0.22	-0.14	0.35	-0.31	-0.17	0.03	0.41	0.1	-0.89	-2.66	0.26	-0.19	0.4	0.54	0.34	-0.58
GENE1245X	5300	" PIN1 -  Peptidylprolyl cis/trans isomerase, NIMA-interacting 1"	1	-0.38	-0.1	0.3	0.15	0.01	-0.9	-0.51	-0.67	-0.42	-0.39	-1.01	-1.79	-0.21	-0.16	-0.13	-0.53	-0.25	-1.29	-0.07	-0.33	-0.07	0.47	-0.32	-0.47	0.25	0.16	-0.07	-0.85	-1.8	-0.28	-0.47	0.15	-0.02	-0.14	-0.9
GENE418X	84908	" FAM136A -  family with sequence similarity 136, member A"	1	-0.29	-0.14	0.36	0.03	0.04	-0.79	-0.54	-0.15	-0.22	-0.35	-1.04	-2.31	-0.13	0.21	0.01	-0.02	-0.03	-1.07	0	-0.2	-0.38	0.57	-0.53	-0.73	0.23	-0.05	-0.32	-1.34	-1.94	0.05	-0.71	0.18	0.1	-0.41	-1.05
GENE718X	26521	 TIMM8B -  Translocase of inner mitochondrial membrane 8 homolog B (yeast)	1	0.36	-0.34	0.09	0.08	-0.18	-1.17	-1.01	-0.29	-0.63	-0.42	-1.61	-2.26	-0.39	-0.21	-0.46	-0.38	-0.47	-1.72	0.5	-0.44	-0.06	0	-0.9	-1.08	-0.08	-0.16	-0.35	-1.39	-2.44	0.05	-0.9	0.28	0.06	-0.38	-1.5
GENE1194X	51065	 RPS27L -  Ribosomal protein S27-like	1	-0.1	-0.33	0.1	0.14	0.19	-0.86	-0.39	0.09	-0.12	-0.14	-1.15	-1.79	-0.19	-0.1	0.02	-0.31	-0.18	-1.16	0.2	0.03	-0.27	0.03	-1.16	-0.94	0.51	0.01	-0.01	-1.04	-1.71	0.02	-0.88	0.34	-0.17	-0.22	-0.69
GENE287X	116829	 CG012 -  hypothetical gene CG012	1	0.01		-0.01	-0.05	0.06	-1.04	-0.68	0.01	-0.29	-0.19	-0.96	-2.75	-0.48	-0.28	0.05	-0.24	-0.04	-0.9	0.29	-0.08	-0.4	0.2	-0.92	-1.04	0.04	-0.1	-0.25	-0.95	-2.63	0.46	-0.31	0.46	-0.31	-0.43	-0.65
GENE931X	100188893	 TOMM6 -  Translocase of outer mitochondrial membrane 6 homolog (yeast)	1	-0.26	-0.11	-0.24	0.3	0.3	-0.71	-0.78	0.02	-0.21	0.07	-1	-1.93	-0.09	0	0.08	-0.23	0.01	-0.91	-0.14	-0.17	-0.08	0.38	-0.36	-0.92	0.27	0.44	-0.16	-1.1	-2.4	0.25	-0.19	0.73	0.26	0.07	-0.36
GENE913X	26519	 TIMM10 -  Translocase of inner mitochondrial membrane 10 homolog (yeast)	1	-0.61	-0.08	-0.01	0.43	0.26	-0.69	-0.67	0.26	0.1	0.15	-0.98	-1.79	0.01	0.04	0.12	-0.16	0.09	-1.02	-0.12	-0.22	0.12	0.23	-0.55	-0.97	0.04	0.31	0.01	-0.95	-2.17	0.04	-0.41	0.45	0.2	0.41	-0.49
GENE7X	30851	 TAX1BP3 -  Tax1 (human T-cell leukemia virus type I) binding protein 3	1	-0.33	-0.01	0.36		-0.02	-1.15	-0.48	-0.57	-0.29	0.1	-1.31	-1.69	-0.52	-0.42	-0.01	-0.05	-0.25	-1.11	0.19		-0.29	0.09		-1.39	-0.02	0.02	-0.23	-1.57	-2.4	-0.15	-0.69	0.18	-0.33	-0.1	-0.59
GENE274X	64710	 NUCKS1 -  Nuclear casein kinase and cyclin-dependent kinase substrate 1	1	0.17	0.14	-0.28	0.17	-0.19	-1.36	-0.87	-0.19	-0.52	-0.47	-1.52	-2.7	-0.4	-0.2	-0.22	-0.2	-0.24	-1.08	0.16	-0.63	0.51	-0.04	-0.75	-1.32	0.11	-0.15	-0.36	-1.36	-2.61	-0.17	-1.81	0.38	0.24	-0.04	-0.41
GENE1174X	11337	 GABARAP -  GABA(A) receptor-associated protein	1	-0.06	-0.36	0.24	0.15	0.01	-1.39	-1.42	0.01	-0.19	-0.08	-1.69	-2.27	-0.56	-0.36	-0.18	-0.23	-0.11	-0.84	-0.37		0.24	0.13	-0.64	-0.41	-0.05	-0.46	-0.73	-0.52	-1.84	-0.33	-1.35	0.03	0.01	-0.58	-0.79
GENE819X	6051	 RNPEP -  Arginyl aminopeptidase (aminopeptidase B)	1	0.14	-0.26	0.11	-0.07	0.08	-1.4	-0.96	0.06	-0.14	-0.43	-1.37	-2.08	-0.17	0.15	-0.34	-0.12	-0.34	-0.39	-0.2	-0.02	0.01	0.21	-0.3	-0.49	0.15	-0.02	-0.39	-0.82	-1.92	0.1	-0.61	0.06	-0.11	-0.71	-0.77
GENE1707X	23171	 GPD1L -  Glycerol-3-phosphate dehydrogenase 1-like	1	-0.3	-0.25	0.49	0.01	0.04	-1.4	-1.67	0.17	-0.13	-0.28	-1.27	-2.03	0.03	0.58	0.05	-0.2	-0.12	-0.02	0	-0.21	-0.15	0.37	-0.71	-1.05	-0.21	0.01	0.07	-0.99	-1.56	-0.6	-0.63	0.08	0.09	-0.08	-0.46
GENE587X	4255	 MGMT -  O-6-methylguanine-DNA methyltransferase	1	-0.48	-0.31	0.36	0.32	0.11	-1.41	-2.02	-0.02	-0.23	-0.26	-0.87	-2.02	-0.22	0.12	-0.13	-0.59	-0.25	-0.59	0.43	0.03	-0.08	-0.37	-0.89	-1.12	0.06	-0.46	-0.37	-1.37	-1.72	-0.06	-0.89	-0.33	-0.35	-0.19	-0.52
GENE995X	2876	 GPX1 -  Glutathione peroxidase 1	1	-0.19	-0.2	-0.03	0.2	0.22	-2.69	-2.15	-0.26	-0.24	-0.11	-1.09	-2.84	-0.39	-0.25	-0.2	-0.21	-0.23	-1.27	0.21	0.2	-0.27	-0.14	-1.33	-1.23	-0.31	-0.55	-0.7	-1.74	-2.07	-0.83	-0.87	-0.31	-0.58	-0.38	-0.79
GENE1394X	7001	 PRDX2 -  peroxiredoxin 2	1	-0.37	-0.1	-0.06	0.45	0.31	-1.58	-1.01	-0.05	-0.06	-0.1	-0.55	-1.86	-0.16	-0.02	-0.54	-0.47	-0.33	-0.98	0.07	-0.07	0.02	-0.02	-0.63	-0.78	0.03	-0.33	-0.45	-1.2	-1.89	-0.52	-0.6	-0.06	-0.32	-0.41	-0.37
GENE684X	1801	 DPH1 -  DPH1 homolog (S. cerevisiae)	1	-0.43	-0.21	0.21	0.25	0.07	-1.26	-1.17	-0.15	-0.21	-0.11	-0.71	-1.97	-0.32	-0.32	-0.27	-0.11	0.06	-0.51	0.28	-0.02	-0.37	0.11	-0.69	-1.01	-0.12	-0.15	-0.56	-0.75	-1.8	-0.11	-0.3	0.09	-0.4	-0.42	-0.82
GENE319X	10280	 SIGMAR1 -  Sigma non-opioid intracellular receptor 1	1	-0.29	-0.1	0.34	0.01	0.06	-1.81	-1.06	-0.22	-0.33	-0.69	-1.21	-1.77	-0.37	0.08	-0.3	-0.33	-0.32	-0.66	0.05	-0.22	-0.09	0.26	-0.9	-1.81		0.1	-0.21	-1.11	-2.02	-0.45	-1.12	0.15	-0.12	-0.31	-0.65
GENE662X	6894	 TARBP1 -  TAR (HIV-1) RNA binding protein 1	1	0	-0.22	0.32	-0.17	0.06	-1.74	-1.77	0.51	-0.26	-0.08	-1.51	-2.47	-0.54	0.24	0.06	-0.11	-0.8	-0.46	0.4	-0.73	0.07	0.27	-1.36	-1.63	-0.1	-0.29	-0.74	-1.15	-2.21	-0.34	-0.61	0.32	0.16	-0.47	-0.99
GENE462X	23208	 SYT11 -  Synaptotagmin XI	1	-0.37	-0.08	0.29	0.19	-0.05	-2.39	-1.62	0.3	-0.27	-0.04	-1.67	-2.82	-0.13	-0.13	0.06	-0.23	-0.4	-0.89	0.51	-0.56	-0.14	0.17	-1.25	-2.29	-0.19	-0.26	-1.05	-1.71	-3.1	-0.73	-1.52	0.09	-0.22	-1.05	-1.27
GENE1193X	27068	 PPA2 -  pyrophosphatase (inorganic) 2	1	-0.22	-0.3	0.22	0.17	0.15	-1.61	-1.19	0.07	-0.16	-0.21	-1.69	-2.1	-0.51	0	0.37	-0.16	-0.37	-1.16	0.14	0.06	-0.23	0.04	-0.56	-1.63	0.02	0	-0.43	-1.26	-1.75	-0.32	-1.53	-0.11	-0.31	-0.39	-0.94
GENE291X	113246	 C12orf57 -  Chromosome 12 open reading frame 57	1	-0.22		0.19	0.16	-0.12	-1.47	-1.14	0.12	-0.35	-0.05	-1.42	-2.88	-0.65	0.08	0.1	-0.28	-0.65	-0.28	0.11	0.03	-0.45	0.32	-0.58	-1.55	0.1	-0.08	-0.43	-1.01	-1.99	-0.21	-1.49	-0.22	-0.32	-0.52	-0.65
GENE596X	79718	 TBL1XR1  -  transducin (beta)-like 1 X-linked receptor 1	1	-0.06	0.25	-0.01	0.16	-0.35	-2.69	-1.88	-0.26	-0.9	-0.16	-1.51	-2.91	-0.86	-0.51	-0.15	-0.36	-0.29	-0.28	0.51	-0.21	-0.47	0.17	-1.39	-1.75	0.01	-0.22	-0.81	-1.41	-1.85	-1.03	-1.9	0.02	-0.35	-0.59	-0.98
GENE1642X	84317	 CCDC115 -  Coiled-coil domain containing 115	1	0.05	-0.22	0.02	0.06	0.1	-2.17	-1.55	-0.01	-0.1	-0.28	-1.3	-1.61	0.15	-0.12	0.21	-0.01	-0.13	0.08	0.41	-0.14	-0.14	-0.14	-1.88	-1.58	0.01	-0.06	-0.77	-1.77	-2.19	-0.67	-1.09	0.31	-0.03	-0.41	-0.67
GENE460X	5476	 CTSA -  cathepsin A	1	-0.27	-0.18	0.03	0.3	0.12	-2.02	-1.95	-0.06	0.08	-0.35	-0.58	-2.59	0.02	-0.41	-0.25	-0.1	0.33	-0.23	0.67	0.23	-0.14	-0.75	-1.89	-1.39	0.38	-0.39	-0.88	-1.04	-2.34	0.07	-0.55	0.16		-0.05	-0.55
GENE1148X	57136	 C20orf3 -  Chromosome 20 open reading frame 3	1	-0.11	-0.07	-0.11	0.05	0.22	-1.53	-1.3	0.24	0.15	-0.29	-1.34	-2.27	0.21	0	-0.08	0.54	0.08	0	0.47	-0.15	0.21	-0.52	-1.37	-1.5	-0.09	-0.77	-0.72	-0.62	-2.31	-0.09	-1.23	0.38	0.28	-0.1	0.58
GENE6X	5338	 PLD2 -  Phospholipase D2	1	0.09	0.14	-0.27	0.05	0.01	-2.43	-2.65	-0.35	-0.14	-0.65		-2.57	0.19	-0.68	-0.28	0.75	0.09	-1.45	0.3	-0.95	0.59	0.07	-1.21	-1.36	-0.24	-0.44	-0.91		-2.75	-1.13	-1.88	0.01	-0.28	0.43	-1.05
GENE624X	9459	 ARHGEF6 -  Rac/Cdc42 guanine nucleotide exchange factor (GEF) 6	1	0.08	-0.1	0.12	-0.12	0.02	-3	-2.26	0.13	-0.09	-0.85	-2.16	-3.25	-0.41	-0.28	-0.12	0.29	-0.45	-1.3	0.41	-1.43	0.85	0.17	-1.59	-0.12	-0.16	-0.73	-1.35	-1.59	-3.08	-1.43	-1.75	0.09	-0.58	0.03	-0.87
GENE1298X	112487	 C14orf126 -  Chromosome 14 open reading frame 126	1	0.03	0.02	-0.02	-0.16	0.12	-1.81	-0.76	0.34	0.15	-0.4	-1.36	-2.24	0.01	-0.16	-0.16	0.07	-0.09	-1.06	-0.2	-0.56	0.84	-0.08	-0.61	0.02	0.27	-0.23	-0.78	-1.28	-2.3	-1.44	-1.65	0.25	0.34	-0.03	-0.82
GENE953X	23228	" PLCL2 -  Transcribed locus, strongly similar to NP_001137854.1 inactive phospholipase C-like protein 2 isoform 1 [Homo sapiens]"	1	-0.4	-0.1	-0.02	0.38	0.09	-1.71	-1.63	-0.18	-0.09	0.15	-1.3	-2.08	-0.1	-0.13	0.15	-0.17	0.22	-0.81	0.12	-0.38	0.13	0.13	-1.45	-0.97	-0.02	-0.1	-0.5	-1.55	-1.5	-0.56	0.18	-0.46	-0.34	-0.05	-1.22
GENE9X	5037	 PEBP1 -  Phosphatidylethanolamine binding protein 1	1	-0.61	-0.09	0.5	0.26	-0.06	-1.25	-1.13	0.25	-0.14	0.11	-0.7	-1.9	0.18	0.39	0.12	-0.15	0.12	0.18	-0.16	-0.28		0.44		-0.71	1.21	0.26	0.06	-0.23	-2.03	0.26	-0.16	0.48	0.35	-0.03	-0.28
GENE181X	2934	" GSN -  Gelsolin (amyloidosis, Finnish type)"	1	-0.39	-0.07	0.26	0.29	-0.08	-0.85	-1.23	-0.22	-0.16	0.14	-1.24	-2.88	0.19	0.25	-0.18	-0.28	0.25	-0.51	-0.04	-0.1	-0.15	0.28	-0.67	-3.03		0.31	-0.14	-0.56	-2.77	0.31	-0.91	0.14	-0.27	-0.41	-0.49
GENE239X	81035	 COLEC12 -  Collectin sub-family member 12	1	0.07	-0.1	0.22	-0.04	-0.14	-1.79	-2.21	0.32	-0.02	0.5	-0.96	-2.23	-0.19	0.76	0.14	0.08	0.84	-0.2	-0.48	-0.27	0.38	0.36	-1.42	-3.61	-0.12	-0.16	-0.52	-0.79	-3.39	-0.09	-1.14	0.26	0.12	-0.65	0.79
GENE858X	285362	 SUMF1 -  sulfatase modifying factor 1	1	-0.22	-0.28	0.11	0.1	0.27	-0.95	-0.09	0.01	-0.11	-0.19	-1.03	-1.33	0.21	0.44	0.12	0.01	-0.02	0.45	0.55	-0.14	-0.38	-0.03	-0.62	-1.54	0.08	0	-0.34	-0.81	-2.21	-0.41	-1.61	0.19	0.1	-0.34	-0.56
GENE178X	79026	 AHNAK -  AHNAK nucleoprotein	1	-0.19	-0.33	0.31	0.28	-0.08	-0.2	-0.04	0.1	-0.21	-0.12	-1.06	-2.51	0.43	0.52	-0.13	0.11	0.05	-0.44	-0.02	-0.4	0.03	0.4	-0.84	-2.7	-0.04	0.05	-0.27	-1.07	-3.41	0.17	-2.11	0.27	0.13	-0.7	-1.52
GENE436X	5591	" PRKDC -  Protein kinase, DNA-activated, catalytic polypeptide"	1	-0.04	0.1	0.07	0.01	-0.08	-0.26	-0.6	0.13	-0.13	-0.41	-0.8	-1.44	-0.2	-0.12	0.1	-0.16	-0.1	-0.51	0.05	-0.28	-0.19	0.41	-0.67	-1.6	-0.09	0.1	-0.66	-0.7	-1.99	-0.52	-1.95	-0.04	-0.21	-0.08	-1.18
GENE1424X	23076	 RRP1B -  ribosomal RNA processing 1 homolog B (S. cerevisiae)	1	0.08	-0.13	-0.07	0.01	0.1	-0.46	-0.49	-0.02	-0.11	-0.46	-0.99	-1.39	0.46	0.13	-0.01	-0.11	0.1	-0.67	0.08	-0.31	0.29	-0.05	-0.91	-0.63	0.08	-0.05	-0.52	-0.73	-2.25	-1.19	-2.17	0.06	0.34	0.43	-0.71
GENE201X	5048	" PAFAH1B1 -  Platelet-activating factor acetylhydrolase 1b, regulatory subunit 1 (45kDa)"	1	-0.32	-0.11	-0.2	0.42	0.2	-0.81	-0.95	0.01	-0.13	-0.72	-1.4	-2.94	0	0.26	0.17	-0.28	0.31	-0.87	0.17	-0.6	0.03	0.4	-0.09	-0.6	0.31	0.43	-0.34	-0.98	-3.08	-1.09	-2.71	0.46	0.34	0.03	-1.75
GENE335X	6418	 SET -  SET nuclear oncogene	1	-0.12	-0.23	0.08	0.12	0.14	-0.2	-0.91	0.03	-0.01	-0.13	-1.07	-2.09	-0.21	-0.13	0	-0.03	0.04	-0.47	0.29	-0.19	0.04	-0.05	0.13	-0.4	0.09	0.06	-0.11	-0.39	-1.75	-0.41	-2.07	0.03	0.12	-0.1	-0.49
GENE1153X	6059	" ABCE1 -  ATP-binding cassette, sub-family E (OABP), member 1"	1	-0.16	-0.12	-0.12	0.31	0.07	-0.17	-0.35	-0.01	0.3	-0.09	-0.73	-1.19	-0.27	-0.22	0.22	-0.07	0.08	-1.31	0.3	0.37	-0.14	-0.52	-0.69	-1.11	-0.34	-0.03	-0.61	-0.71	-2.47	-1.19	-1.79	-0.05	-0.31	0.34	-1.23
GENE857X	9240	 PNMA1 -  Paraneoplastic antigen MA1	1	0.14	-0.04	-0.15	0.05	-0.01	-0.13	-0.27	0.19	0.25	0.3	-0.82	-2.03	-0.12	-0.47	-0.19	0.32	0.16	-1.44	0.44	-0.09	0.08	-0.41	-1.71	-0.98	-0.12	-0.19	-0.69	-1.52	-2.88	-0.75	-1.98	0.34	-0.61	-0.28	-2.37
GENE1048X	5339	 PLEC -  Plectin	1	-0.09	0.11	-0.45	0.41	0.03	-0.07	-0.37	-0.08	-0.22	-0.06	-1	-2.31	-0.6	-0.66	-0.38	0.21	0.43	-1.31	0.06		-0.27	0.22	-2.37	-1.95	0.43	-0.4	-0.81	-2.28	-2.34	-1.14	-2.84	-0.63	-0.64	-0.33	-1.64
GENE660X	3166	 HMX1 -  H6 family homeobox 1	1	0.13	-0.13	-0.28	0.04	0.22	-1.31	-0.56	0.61	0.1	0.01	-0.99	-1.38	-0.2	-0.45	0.04	0.38	-0.32	-0.59	0.32	-0.81	0.61	-0.12	-1.75	-0.71	-0.25	-0.77	-1.18	-1.03	-2.31	-1.39	-1.41	0.08	-0.09	-0.44	-1.11
GENE275X	51071	 DERA -  2-deoxyribose-5-phosphate aldolase homolog (C. elegans)	1	0.27	0.24	-0.77	0.26	0.01	-1.8	-0.58	0.05	-0.13	-0.23	-1.48	-1.16	0.25	-0.19	-0.01	0.34	0.08	-0.59	0.8	-1.48	0.73	-0.04	-1.7	-1.34	-0.3	-0.88	-1.49	-1.02	-3.15	-1.57	-1.34	0.32	-1.21	0.27	-0.97
GENE1519X	6117	" RPA1 -  Replication protein A1, 70kDa"	1	0.07	-0.07	-0.05	0.2	-0.14	-1.52	-1.03	0.21	-0.03	-0.44	-1.8	-1.71	-0.02	-0.29	0.04	0.03	-0.34	-0.32	0.12	-1	0.46	0.41	-1.36	-1.15	-0.24	-0.73	-1.26	-1.42	-2.39	-1.3	-1	-0.26	-1.07	-0.57	-1.17
GENE1359X	1020	 CDK5 -  cyclin-dependent kinase 5	1	-0.01	-0.02	-0.45	0.34	0.13	-2.02	-1.15	-0.08	-0.28	-0.41	-1.49	-1.5	0.28	0.11	-0.44	-0.14	-0.3	-0.31	0.21	-0.49	0.47	-0.2	-1.32	-0.6	-0.19	0.13	-0.91	-0.97	-1.73	-1.23	-0.83	-0.17	-0.82	-0.26	-0.18
GENE669X	1891	" ECH1 -  Enoyl Coenzyme A hydratase 1, peroxisomal"	1	-0.01	-0.37	-0.12	0.28	0.21	-2	-1.18	-0.33	-0.28	-0.62	-1.19	-1.64	-0.2	-0.08	-0.69	-0.57	-0.61	-0.23	0.4	-0.42	0.73	-0.5	-1.78	-0.87	0.06	-0.75	-1.2	-1.62	-2.32	-0.73	-1.73	-0.4	-0.23	-0.62	-0.64
GENE1288X	4713	" NDUFB7 -  NADH dehydrogenase (ubiquinone) 1 beta subcomplex, 7, 18kDa"	1	-0.17	0.07	-0.47	0.51	0.07	-1.54	-1.06	-0.2	-0.13	-0.13	-1.09	-1.97	-0.11	-0.22	-0.73	-0.37	-0.22	-1.58	0.35	0.1	0.21	-0.65	-1.06	-1.12	-0.28	-0.48	-0.78	-1.62	-1.65	-0.82	-0.79	-0.13	0.38	-0.62	-0.68
GENE1402X	4704	" NDUFA9 -  NADH dehydrogenase (ubiquinone) 1 alpha subcomplex, 9, 39kDa"	1	-0.04	0.34	-0.71	0.27	0.15	-0.86	-0.81	-0.51	0.3	0.1	-1.25	-1.12	0.11	-0.01	-0.24	0.28	-0.05	-1.46	0.19	-0.98	0.85	-0.07	-0.83	-0.81	0.25	-0.79	-1.29	-1.83	-2.81	0.59	0.02	0.22	-0.16	0.2	0.76
GENE565X	402	 ARL2 -  ADP-ribosylation factor-like 2	1	-0.17	0.43	-0.54	0.3	-0.04	-2.14	-1.57	-0.25	-0.08	-0.78	-2.07	-1.28	0.1	-0.17	-0.39	-0.46	-0.18	-0.53	-0.21	-0.67	0.6	0.27	-1.01	-0.47	0.3	-0.5	-1.41	-1.9	-2.72	-0.52	-0.8	0.16	0.01	0.75	0.27
GENE825X	26509	 MYOF -  myoferlin	1	0.27	0.37	-0.79	0.31	-0.15	-0.97	-1.41	0.33	-0.11	-0.26	-1.39	-1.71	0.54	0.38	-0.16	0.24	-0.09	-0.77	0.04	-1.16	0.79	0.34	-1.03	-0.77	0.29	-0.17	-1.07	-0.79	-2.15	-0.08	-0.82	0.4	0.34	0.23	-0.09
GENE2X	8933	" FAM127A -  Family with sequence similarity 127, member A"	1	0.55	0.16	-1.2	0.24	0.24	-1	-0.92	0.01	-0.16	0.01	-1.35	-2.8	0.23	0.26	0.09	-0.08	0.17	-1.28	-0.8	-0.49	0.5	0.79	-0.49		0.4	0.06	-0.42	-2.03	-3.74	0.06	-1.16	0.41	0.38	-0.08	0.24
GENE856X	128977	 C22orf39 -  chromosome 22 open reading frame 39	1	-0.23	0.22	-0.89	0.56	0.33	-0.61	-0.81	0.41	0.32	0.34	-0.97	-2.15	0.22	0	0.45		0.34	-0.9	0	-0.86	0.5	0.35	-0.28	-0.58	-0.22	-0.4	-0.56	-1.09	-2.9	-0.29	-1	0.17	0.04	-0.47	1.48
GENE1141X	375346	 TMEM110 -  transmembrane protein 110	1	-0.6	0.26	-0.02	0.3	0.06	-1.39	-0.95	-0.54	-0.28	-0.29	-0.52	-2.01	0.44	0.39	-0.03	-0.14	-0.06	-0.71	-0.5	0.17	-0.43	0.75	-0.69	-1.44	-0.22	-0.33	-1.01	-1.55	-1.94	0.35	-0.91	-0.4	-0.53	-0.28	-0.95
GENE1271X	401494	 PTPLAD2 -  protein tyrosine phosphatase-like A domain containing 2	1	-0.02	-0.16	0.03	-0.04	0.17	-1.35	-0.81	-0.03	-0.16	-0.61	-1	-1.84	0.15	0.03	0.03	0.31	-0.76	-0.22	0.21	-0.91	0.29	0.1	-1.01	-1.59	0.49	-0.21	-0.73	-1.88	-1.53	-0.17	-0.05	0.25	0.08	-0.26	-0.32
GENE413X	27315	 PGAP2 -  Post-GPI attachment to proteins 2	1	0.1	-0.61	-0.01	0.76	-0.23	-1.67	-1.08	-0.39	-0.37	-0.66	-1	-2	-0.11	-0.1	-0.63	0.09	-0.53	-0.05	0.83	-1.08	0.69	-0.44	-2.09	-1.71		-0.85	-1.08	-1.35	-2.56	0.39	-0.53	0.35	0.32	-0.4	-0.23
GENE265X	641371	 ACOT1 -  Acyl-CoA thioesterase 1	1	-0.17	0.14	-0.77	0.53	0.25	-0.82	-0.9	0.03	0.39	0.53	-1.07	-2.83	0.03	0.57	0.16	0.29	1.19	0.38	-0.15	-0.27	0.15	0.28	-0.97	-0.85	0.29	0.55	-0.2	-1.41	-3.15	-0.02	0.05	-0.48	0.15	0.26	-1.03
GENE1621X	115286	" SLC25A26 -  Solute carrier family 25, member 26"	1	-0.28	-0.24	0.08	0.22	0.24	-0.73	-0.78	-0.27	0.24	0.11	-0.76	-1.31	-0.24	-0.28	-0.07	0.02	0.62	-0.26	0.1	0.58	-0.4	-0.27	-0.11	-0.98	-0.15	-0.06	-0.27	-1.96	-2.52	-1.07	-0.82	0.12	-0.11	0.07	0.29
GENE606X	10645	" CAMKK2 -  Calcium/calmodulin-dependent protein kinase kinase 2, beta"	1	-0.26	0.1	-0.11	0.18	0.09	-1.53	-1.54	-0.04	-0.14	-0.38	-0.87	-1.64	0.15	-1	-0.85	-0.44	-0.52	-0.18	-0.02	0.26	-0.4	0.17	-0.63	-0.93	-0.3	-0.86	-0.64	-1.96	-3.29	-0.08	-0.69	-0.75	-0.61	-0.29	-0.47
GENE1348X	5245	 PHB -  Prohibitin	1	-0.35	-0.57	-0.18	0.56	0.53	-1.07	-0.92	-0.2	-0.06	-0.31	-0.97	-1.7	-0.12	-0.15	-0.74	-0.67	-0.53	-0.93	0.48	0.26	-0.04	-0.7	-1.83	-1.45	-0.4	-1.02	-0.52	-1.91	-2.19	-0.79	-1.27	-0.89	-0.77	-0.03	-0.81
GENE1083X	2109	" ETFB -  Electron-transfer-flavoprotein, beta polypeptide"	1	-0.64	0.1	-0.09	0.47	0.17	-1.76	-0.79	-0.23	-0.06	-0.23	-0.92	-1.54	-0.37	-0.28	-0.68	-0.46	-0.26	-0.64	0.09	0.53	-0.09	-0.49	-1.54	-0.7	0.07	-0.42	-0.45	-1.69	-1.49	-1.09	-0.75	-1.05	-0.33	-0.11	-0.49
GENE540X	2232	 FDXR -  Ferredoxin reductase	1	-0.17	-0.28	-0.14	0.42	0.15	-2.1	-1.34	0.04	-0.13	-0.66	-1.47	-1.91	-0.1	-0.77	-1.15	-1.21	-1.54	-1.26	-0.49	0.51	0.14	-0.16	-2.33	-1.31	-0.19	-1.04	-1.07	-2.2	-1.78	-2.1	-1.81	-1.1	-0.79	-0.84	-0.71
GENE1233X	4669	" NAGLU -  N-acetylglucosaminidase, alpha-"	1	0.07	0.53	-0.28	-0.01	-0.31	-1.63	-1.63	-1.65	-0.33	-0.85	-1.71	-2.09	0.01	-0.41	-0.61	-0.89	0.26	-0.32	-0.24	0.52	0.23	-0.5	-0.77	-0.63	-0.2	-1.07	-1.28	-2.11	-1.96	-1.52	-1.19	-0.66	-1.03	-0.59	-0.85
GENE1157X	79699	 ZYG11B -  Zyg-11 homolog B (C. elegans)	1	-0.31	-0.31	0.34	0.35	-0.08	-1.99	-1.3	-0.16	-0.23	-0.35	-1.15	-2.36	0.5	0.67	0.47	0	0.14	0.62	0.16	0.4	0.03	-0.59	-0.55	-0.28	-0.46	-0.38	-1.14	-1.97	-1.95	-1.51	-1.68	-0.06	-0.53	0.03	-0.54
GENE1377X	8165	 AKAP1 -  A kinase (PRKA) anchor protein 1	1	-0.05	0.12	-0.26	0.19	-0.01	-1.13	-0.88	-0.03	-0.09	-1.05	-0.97	-1.84	0.17	0.27	-0.03	-0.11	0.2	-0.2	-0.3	0.32	0.04	-0.06	-1.04	-0.9	-0.64	-0.28	-0.71	-2.18	-1.34	-1.18	-0.75	-0.78	-0.51	-0.71	-0.32
GENE463X	79178	 THTPA -  thiamine triphosphatase	1	-0.2	-0.36	0.18	0.05	0.32	-2.09	-0.63	-0.34	-0.34	-0.62	-1.25	-1.59	0.35	0	-0.12	-0.3	0.26	-0.44	-0.28	0.05	0.23	0	-0.81	-0.09	0.1	-0.56	-1.08	-2.04	-1.19	-0.77	-0.38	-0.32	-0.6	-0.34	-0.62
GENE453X	8934	" RAB7L1 -  RAB7, member RAS oncogene family-like 1"	1	0.5	-0.68	-0.07	0.08	0.18	-1.69	-1.23	-0.44	-0.4	-0.8	-1.14	-1.67	0.43	0.23	-0.19	-0.66	-0.22	-0.04	-0.88	0.81	0.3	-0.24	-0.94	-0.22	-0.47	-0.17	-0.48	-2.08	-1.14	-0.84	-0.46	0.17	-0.03	-0.13	-0.36
GENE690X	4668	" NAGA -  N-acetylgalactosaminidase, alpha-"	1	0.16	-0.57	0.12	0.13	0.17	-2.35	-2.51	-0.57	-0.26	-0.17	-1.22	-2.06	-0.09	-0.66	-0.46	-0.3	0.07	-0.74	0.18	0.61	-0.21	-0.59	-0.68	-1.01	-0.79	-0.7	-0.41	-2.41	-1.74	-1	-0.4	-0.39	-0.88	-0.21	-0.52
GENE443X	29103	" DNAJC15 -  DnaJ (Hsp40) homolog, subfamily C, member 15"	1	0.08	-0.08	-0.17	0.02	0.15	-1.27	-1.33	0.4	-0.04	-0.33	-1.02	-2.32	-0.25	-0.45	0.11	0.36	-0.15	-1.83	0.5	-0.09	0.41	-0.82	-1.61	-0.92	-0.22	-0.85	-0.47	-0.96	0.05	0.16	-1.28	0.14	0.28	-0.22	-0.37
GENE226X	2170	" FABP3 -  fatty acid binding protein 3, muscle and heart (mammary-derived growth inhibitor)"	1	-0.26	-0.22	-0.16	0.56	0.07	-0.58	-1.68	-0.29	-0.3	0.11	-0.75	-2.47	0.48	0.98	-0.01	-0.03	0.05	-1	0.38	-0.09	-0.02	-0.27	-1.78	-1.72	0.09	-0.14	-0.55	-1.38	-0.98	-0.54	-2.24	-0.26	-0.38	-0.5	-0.69
GENE1235X	55187	 VPS13D -  Vacuolar protein sorting 13 homolog D (S. cerevisiae)	1	-0.3		0	0.32	-0.02	-0.87	-1.26	-0.22	-0.08	-0.72	-1.88	-2.42	0.06	0.55	-0.06	0.35	-0.18	-1.23		-0.45	0.01	0.45	-1.75	-0.73		-0.32	-0.86	-1.85	-1.67	-1.37	-1.97	0.07	-0.15	-0.16	-2.18
GENE780X	1643	" DDB2 -  damage-specific DNA binding protein 2, 48kDa"	1	-0.14	-0.06	0.1	0.22	-0.12	-1.59	-1.3	-0.26	-0.41	-0.64	-1.85	-1.99	-0.15	-0.4	-0.25	-0.36	-0.14	0.03	0.18	-0.12	0.11	-0.18	-2.47	-1.69	0.33	-0.37	-0.94	-1.64	-0.97	-1.11	-2.56	-0.04	-0.43	-0.56	-0.99
GENE1327X	23307	" FKBP15 -  FK506 binding protein 15, 133kDa"	1	0.6	-0.21	-0.28	-0.1	-0.03	-1.1	-0.88	0.03	-0.08	-0.67	-1.65	-1.86	0.06	-0.15	-0.21	-0.02	-0.42	-0.17	0.32	0.04	0.25	-0.62	-1.52	-1.31	0.06	-0.68	-0.56	-0.54	-1.2	-0.5	-1.82	0.31	-0.25	0	-0.75
GENE1101X	57486	 NLN -  Neurolysin (metallopeptidase M3 family)	1	0.42	-0.16	-0.41	0.12	0.05	-2.09	-1.76	0.2	-0.32	-0.95	-1.63	-2.79	0.33	0.06	-0.29	0.01	-0.35	-0.87	0.6	-0.01	0.24	-0.82	-1.42	-1.34	0.25	-0.66	-0.72	-1.33	-1.32	-1.1	-2.39	0.11	-0.05	-0.07	-1.32
GENE1269X	224	" ALDH3A2 -  Aldehyde dehydrogenase 3 family, member A2"	1	0.09	-0.15	-0.07	0.14	-0.01	-1.89	-1.89	-0.76	-0.45	-1.27	-1.76	-2.76	0.15	0.18	-0.03	-0.09	-0.36	-0.77	0.51	0.01	-0.03	-0.49	-2.55	-2.01	-0.24	-0.37	-0.82	-1.47	-1.09	-0.89	-1.33	-0.11	-0.75	-0.6	-1.78
GENE1660X	847	 CAT -  Catalase	1	-0.06	0.03	0	0.07	-0.03	-2.24	-1.66	-0.54	-0.07	-0.69	-1.66	-1.64	0.14	0.04	-0.27	0.1	-0.15	-0.15	0.13	-0.27	0.15	-0.01	-1.11	-1.25	-0.27	-0.56	-0.9	-0.85	-1.17	-0.73	-1.53	0.31	-0.62	-0.2	-0.65
GENE1060X	84912	" SLC35B4 -  Solute carrier family 35, member B4"	1	-0.02	-0.06	-0.06	0.02	0.11	-1.9	-1.23	-0.32	-0.61	-0.95	-1.99	-2.52	-0.21	0.02	-0.27	-0.44	-0.31	-1.51	0.22	0.11	-0.05	-0.28	-1.5	-1.07	-0.07	-0.12	-0.69	-1.03	-1.02	0.24	-1	-0.12	-0.44	-0.37	-0.73
GENE438X	2218	 FKTN -  Fukutin	1	0.14	-0.15	-0.29	0.01	0.28	-1.24	-0.54	-0.04	-0.33	-1.08	-1.55	-2.12	0	-0.02	0.09	-0.34	-0.02	-1.98	0.68	0.08	-0.04	-0.72	-2.39	-1	0.65	-0.47	-0.9	-1.21	-0.09	-0.69	-2.03	0.2	-0.47	-0.32	-1.63
GENE209X	127018	 LYPLAL1 -  lysophospholipase-like 1	1	0.11	-0.25	-0.1	0	0.24	-2.18	-0.72	-0.1	-0.35	-0.69	-1.49	-2.03	-0.28	-0.12	-0.07	-0.25	-0.24	-1.29	0.74	0.37	-0.15	-0.95	-2.36	0.64	0.56	-0.39	-0.65	-0.84	-0.84	-0.55	-1.58	0.32	0.16	-0.02	-0.96
GENE253X	10476	" ATP5H -  ATP synthase, H+ transporting, mitochondrial F0 complex, subunit d"	1	0.24	-0.31	-0.13	-0.02	0.22	-1.09	-0.66	-0.13	-0.32	-0.42	-0.86	-3.14	-0.18	-0.51	-0.33	0.11	-0.41	-1.17	0.75	0.16	0	-0.89	-1.73	-1.35	0.25	-0.31	-0.51	-0.47	-1.59	-0.05	-0.68	-0.05	-0.34	-0.01	-0.58
GENE279X	55070	 DET1 -  de-etiolated homolog 1 (Arabidopsis)	1	0.37	-0.27	-0.15	0	0.03	-0.77	-0.26	-0.28	-0.58	-0.97	-0.49	-2.38	-0.12	-0.42	-0.42	0.04	-0.16	-0.62	0.65	0.13	0.1	-0.87	-1.97	-1.24	0.1	-0.42	-0.67	-0.53	-0.38	-0.16	-0.65	0.11	-0.33	0.28	-1.65
GENE322X	4082	 MARCKS -  Myristoylated alanine-rich protein kinase C substrate	1	-0.06	0.08	-0.05	0.02	0	-0.38	-0.8	0.38	0.4	0.21	-0.26	-2.49	0.88	-0.34	0.14	0.51	0.7	-0.69	0.43	0.19	0.01	-0.63	-3.12	-1.28	0.26	-0.1	-0.87	-2.17	-3.04	0.21	-0.05	-0.26	-0.31	-0.22	-1.85
GENE806X	114876	 OSBPL1A -  Oxysterol binding protein-like 1A	1	0.2	0.38	-1.09	0.64	-0.11	-1.5	-1.2	0.27	-0.01	-0.27	-1.55	-2.03	0.63	0.7	0.71	-0.34	-0.2	0.75	0	-0.12	0.22	-0.09	-1.96	-1.98	-0.12	-0.73	-1.01	-1.29	-2.34	-0.19	-1.07	-0.05	-0.29	-0.63	0.99
GENE450X	83694	 RPS6KL1 -  Ribosomal protein S6 kinase-like 1	1	0.16	-0.24	-0.06	0	0.16	-0.42	-0.27	-0.4	-0.39	-0.52	-1	-1.87	0.01	-0.03	-0.96	0.12	0.08		-0.13	0.12	-0.37	0.38	-1.56	-2.77	-1	0.14	0.68	-2.4	-3.5	-0.83	-2.98	-1.01	-1.07	-0.67	-1.11
GENE1073X	150465	 TTL -  Tubulin tyrosine ligase	1	-0.3	0.06	0	0.21	0.01	-1.4	-0.95	-0.86	-0.39	-0.92	-1.37	-1.97	0.36	0.13	-0.47	-0.15	0.24	0.18	-0.74	0.5	-0.05	0.3	0.05	-0.63	-0.03	0.52	-0.23	-2.15	-1.58	-0.86	-0.65	-0.5	0.04	0.31	-0.32
GENE861X	54680	" ZNHIT6 -  Zinc finger, HIT type 6"	1	-0.11	0.05	-0.05	0.05	0.07	-1.51	-0.88	-0.09	-0.04	-0.42	-0.9	-1.59	0.07	0.16	-0.11	-0.35	0.17	-0.47	-1.31	0.82	0.13	0.37	0.44	-0.48	0.7	0.27	0.17	-1.63	-1.89	-1	-0.93	0.31	0.17	0.46	-0.88
GENE721X	91875	 TTC5  -  Tetratricopeptide repeat domain 5	1	-0.15	-0.16	-0.16	0.32	0.13	-1.25	-0.35	-0.49	-0.33	-0.23	-1.2	-1.61	0.22	0.35	-0.03	-0.28	-0.06	-0.45	-1.26	0.74	0.15	0.36	0.15	-0.26	0.37	0.29	-0.07	-1.78	-1.85	-0.33	-0.24	0.83	0.18	0.27	-0.3
GENE1264X	134145	" FAM173B -  Family with sequence similarity 173, member B"	1	-0.21	-0.11	0.28	0.07	-0.03	-0.87	-0.56	0.01	-0.22	-0.58	-0.68	-1.5	-0.05	-0.27	-0.03	-0.33	-0.55	-0.71	-0.73	0.51	-0.05	0.28	-0.28	-0.54	0.07	-0.01	-0.48	-2.01	-1.75	-0.21	-0.44	-0.01	-0.07	-0.05	-0.19
GENE781X	79068	 FTO -  Fat mass and obesity associated	1	-0.25	-0.51	0.3	0.2	0.26	-0.49	-0.16	-0.18	0.09	-0.39	-0.37	-0.79	0.42	0.4	0.27	-0.27	-0.14	-0.22	-1.75	1.07	0.37	0.32	0.29	0.21	0.58	0.57	0.13	-1.65	-1.3	-1.15	-0.27	0.72	0.5	0.53	0.44
GENE402X	10577	" NPC2 -  Niemann-Pick disease, type C2"	1	-0.12	-0.46	-0.07	0.33	0.3	-0.41	-0.44	0.05	0.26	0.48	0.31	-0.8	0.39	0.16	0.02	0	0.4	-0.36	-1.52	1.31	0.25	-0.05	0.05	-0.93	-0.09	0.12	0.09	-2.02	-1.91	-0.75	-0.23	0.35	0.08	0.12	0.47
GENE16X	1176	" AP3S1 -  Adaptor-related protein complex 3, sigma 1 subunit"	1	-0.14	-0.49	0.17	0.2	0.25	-0.66	-0.63	-0.06	0.08	0.33	-0.47		0.31	0.02	-0.23	0.34	0.55	-0.34	-1.01	1.07	0.46	-0.51	-0.09	0.03	-0.29	0.03	0.16	-1.62	-2.02	-0.37	0.38	0.5	0.06	0.54	0.17
GENE986X	27089	" UQCRQ -  Ubiquinol-cytochrome c reductase, complex III subunit VII, 9.5kDa"	1	-0.37	-0.22	0.09	0.4	0.1	-1.06	-0.23	-0.18	-0.18	0.36	-0.46	-1.2	-0.26	-0.12	-0.44	-0.38	-0.1	-1.35	-1.27	1.12	-0.07	0.22	-0.5	-0.72	0.26	-0.13	-0.19	-1.77	-2.05	-0.41	-0.44	-0.86	-0.35		-0.52
GENE698X	4696	" NDUFA3 -  NADH dehydrogenase (ubiquinone) 1 alpha subcomplex, 3, 9kDa"	1	-0.47	-0.28	0.06	0.43	0.27	-1.25	-0.8	0.07	-0.27	0.2	-0.8	-2	-0.12	-0.05	-0.69	-0.43	-0.13	-1.68	-0.37	0.25	0.1	0.01	-0.67	-0.8	0	-0.2	-0.34	-2.34	-1.57	-0.84	-0.12	-0.46	-0.3	-0.27	0.04
GENE391X	136	 ADORA2B -  Adenosine A2b receptor	1	-0.22	0	0.05	0.3	-0.14	0.54	-0.55	-0.26	-0.3	-0.04	-0.13	-0.83	-0.05	0.63	-0.09	-0.04	0.2	0.06	0.09	-0.2	-0.12	0.24	-2.61	-0.74	0.03	0.25	-0.41	-1.59	-1.39	-1.59	-1.65	-0.1	-0.08	-0.18	-0.69
GENE71X	51523	 CXXC5 -  CXXC finger 5	1	-0.2	0.22	-0.43	0.16	0.27	-0.45	-0.33	0.74	0.53	0.35	-1.52	-2.02	-0.03	-0.01	0.04	0.43	0.49	-0.36	-0.17	-0.93	0.75	0.35	-3.92	-2.06	0.32	0.61	-0.46		-3.1	-2.73	-3.63	0.23	0.6	0.87	-0.79
GENE1766X	55893	 ZNF395  -  zinc finger protein 395	1	-0.02	0.14	-0.49	0.32	0.05	-0.32	-0.51	-0.11	0.04	0.19	-0.69	-0.97	0.24	0.46	0.04	0.06	0.3	0.55	-0.6	-0.32	0.2	0.71	-1.12	-1.06	0.31	0.42	-0.47	-1.8	-1.6	-1.05	-0.56	0.28	0.47	-0.14	-0.14
GENE976X	55852	 TEX2 -  Testis expressed 2	1	-0.25	-0.06	-0.15	0.18	0.28	-0.85	-0.14	-0.16	-0.35	-0.5	0.07	-0.45	0.64	0.88	-0.15	-0.46	-0.12	1.02	-0.81	0.29	-0.03	0.55	-0.1	-0.6	0.5	0.03	-0.38	-1.59	-1.69	-1.12	-1.4	-0.22	-0.22	-0.06	-0.19
GENE542X	9054	 NFS1 -  NFS1 nitrogen fixation 1 homolog (S. cerevisiae)	1	-0.28	-0.13	-0.27	0.52	0.17	-0.21	0.19	-0.02	-0.23	-0.34	-0.32	-0.23	0.49	0.86	-0.39	-0.06	-0.12	0.86	-0.31	-0.53	0.35	0.48	-1.42	-0.33	0.5	-0.02	-0.36	-2.14	-1.39	-1.59	-0.87	-0.49	-0.14	0.04	-0.15
GENE1423X	57410	 SCYL1 -  SCY1-like 1 (S. cerevisiae)	1	-0.35	0.55	-0.52	0.21	0.1	0.07	0.02	0.24	-0.27	0.04	-0.27	-0.49	0.03	0.26	-0.29	-0.17	-0.41	0.1	-0.35	-0.63	0.2	0.77	-0.65	-0.78	0.24	-0.2	-0.63	-1.91	-1.26	-1.64	-1.66	-1.01	-0.42	-0.43	-0.89
GENE70X	127281	 C1orf93 -  Chromosome 1 open reading frame 93	1	-0.62	0.47	-0.81	0.56	0.38	-0.53		0.07	0.28	0.38	-0.77	-0.01	1.01	0.47	0.26	0.14	0.59	1.99	0.81	0	-0.47	-0.34	-1.54	-1.47	-0.44	-1	-1.23	-1.82	-3.29	-1.5	-2.1	-0.57	-0.81	-1.02	-1.68
GENE869X	113791	 PIK3IP1 -  Phosphoinositide-3-kinase interacting protein 1	1	-0.27	-0.09	0.29	0.06	0	-1.61	-0.98	0.12	0.71	0.31	-0.34	-0.48	0.3	0.18	-0.07	0.94	-0.04	2.26	0.3	-0.34	-0.24	0.29	-1.66	-2.94	-0.16	-0.47	-1.34	-1.36	-2.68	-1.44	-0.65	-0.03	-0.14	-0.42	-0.6
GENE1575X	2030	" SLC29A1 -  Solute carrier family 29 (nucleoside transporters), member 1"	1	-0.1	-0.12	0	0.06	0.15	-1.25	-0.83	0.04	0.26	0.05	0.96	0.14	0.56	0.55	-0.16	0.15	0.17	2.29	-0.53	-0.32	0.41	0.44	-1.76	-1.62	-0.14	-0.68	-0.65	-1.7	-1.39	-1.35	-1.36	-0.36	-0.07	-0.21	-0.12
GENE801X	5264	 PHYH -  Phytanoyl-CoA 2-hydroxylase	1	-0.18	0.02	-0.37	0.28	0.26	-1.48	-0.64	0.16	0.25	-0.17	-0.53	0.22	0.62	0.67	0.15	0.16	0.08	1.59	0.11	-0.11	0.23	-0.23	-1.19	-0.27	0.02	-0.58	-0.84	-1.02	-1.23	-1.06	-2.19	0.14	-0.24	-0.26	-0.16
GENE1404X	51161	 C3orf18 -  Chromosome 3 open reading frame 18	1	-0.11	-0.14	0.16	0.13	-0.02	-1.19	-0.81	-0.22	-0.7	-0.93	-0.69	-0.47	0.03	0.34	-0.57	-0.9	-0.56	0.77	0.01	-0.26	0.09	0.17	-2.11	-0.91	0.44	0	-0.98	-1.56	-1.92	-1.42	-2.25	0.01	-0.38	-0.46	-0.98
GENE1516X	5933	 RBL1 -  Retinoblastoma-like 1 (p107)	1	0.36	0.16	-0.24	-0.04	-0.22	-1.88	-0.97	-0.44	-0.73	-1.51	-2.15	-1.66	0.21	0.08	-0.37	-0.61	-0.55	0.26	0.31	0.14	0.19	-0.63	-3.25	-2.77	-0.45	-1.03	-1.16	-1.69	-0.75	-0.78	-0.8	-0.45	-1.09	-1.19	-1.02
GENE313X	9203	" ZMYM3 -  Zinc finger, MYM-type 3"	1	-0.24	0.13	-0.26	0.17	0.2	-2.36	-1.52	0.2	-0.5	-0.86	-1.87	-2.29	0.02	0.48	0.03	-0.31	-0.06	0.45	0.09	-0.03	-0.09	0.04	-3.37	-1.67	0.28	-0.63	-1.89	-2.52	-0.23	-1.69	-1.62	-0.6	-0.77	-1.05	-1.35
GENE72X	26586	 CKAP2 -  Cytoskeleton associated protein 2	1	0.02	0.02	-0.31	0.45	-0.2	-1.26	-0.75	0.28	-0.1	-0.25	-0.63	-0.64	0	0.32	0.22	0.33	0.26	0.57	-0.13	-0.38	0.38	0.12	-1.76	-1.52	-0.11	-0.86	-1.56	-1.8		-0.63	-1.13	0.03	-0.58	-1.1	-1.02
GENE1581X	3613	 IMPA2 -  Transcribed locus	1	-0.07	-0.18	0.07	0.1	0.08	-1.94	-1.78	-0.24	-0.29	-0.72	-0.48	-0.84	0.34	0.99	-0.08	-0.18	-0.36	0.7	0.06	-0.09	0.01	0.02	-2.51	-1.81	0.12	-0.29	-1.12	-1.88	-1.42	-1.28	-0.33	0.37	-0.45	-0.57	-0.74
GENE1217X	1429	" CRYZ -  Crystallin, zeta (quinone reductase)"	1	-0.46		0.23	0.23	0.01	-1.24	-0.96	-0.13	-0.09	-0.65	-0.03	-1.12	1.13	1.42	0.27	-0.17	0.02	1.33	0.04	-0.21	0.01	0.17	-2.47	-2.66	0.27	0.09	-0.65	-2.3	-1.68	-1.18	-1.54	-0.16	-0.19	-0.41	-0.69
GENE1506X	29901	 SAC3D1 -  SAC3 domain containing 1	1	0.16	-0.21	0.03	-0.04	0.06	-0.99	-0.8	-0.25	-0.72	-1.11	-0.77	-1.33	0.41	0.62	-0.55	-0.48	-0.63	-0.45	0.14	-0.38	0.28	-0.04	-2.35	-1.39	-0.28	-1.1	-1.41	-1.56	-1.48	-1.34	-1.77	0.09	-0.22	-0.88	-1.57
GENE73X	4035	 LRP1 -  Low density lipoprotein receptor-related protein 1	1	-0.5	0.25	0.06		0.18		-1.6	-0.41	-0.44	-0.48	-0.5	-1.54	0.43	0.3	-0.41	-0.4	0.14	0.3	-0.34		-0.11	0.46		-2.08	-0.77	-1.35	-1.79	-1.64	-1.09	-0.86	-1.52	-0.96	-1.35	-1.55	-1.53
GENE1364X	2771	" GNAI2 -  Guanine nucleotide binding protein (G protein), alpha inhibiting activity polypeptide 2"	1	0.36	0.08	-0.31	0.16	-0.29	-1.32	-0.98	-0.73	-0.7	-0.73	-0.86	-1.4	-0.17	-0.72	-1.12	-0.74	-0.26	-0.81	-0.32	0.19	-0.38	0.34	-0.81	-1.23	-0.69	-0.61	-0.82	-1.8	-1.75	-0.5	-0.9	-0.63	-0.83	-0.81	-0.44
GENE1607X	3077	 HFE -  Hemochromatosis	1	0.21	0.25	-0.34	-0.04	0.04	-0.97	-1.11	0.35	0	-0.48	-0.46	-1.11	-0.64	-0.77	-0.05	-0.18	-0.29	-1.07	0.37	-0.87	0.35	0.15	-0.98	-1.9	-0.38	-0.54	-0.98	-1.83	-1.13	-0.51	-0.55	-0.47	-0.54	-0.42	0.01
GENE293X	5445	 PON2  -  paraoxonase 2	1	0.46	-0.14	-0.15	-0.3	0.13	-1.92	-1.68	-0.21	-0.2	-0.82	-0.95	-2.14	-0.55	0.07	-0.43	0.17	-0.46	-1.28	0.46	-0.16	0.34	-0.65	-1.7	-2.57	-0.13	-0.59	-0.67	-0.83	-1.88	0.35	-0.27	0.5	0.43	-0.21	0.64
GENE791X	4828	 NMB -  Neuromedin B	1	0.23	-0.55	0.21	0.11	-0.02	-1.04	-1.96	-0.64	-0.56	0.04	-1.11	-2.26	-1.46	-1.39	-0.63	-0.32	-0.36	-1.92	0.23	-1	0.75	0.03	-1.28	-2	-0.34	-0.56	-0.75	-1.05	-1.61	0.49	0.12	0.03	0.14	-0.61	-0.38
GENE263X	10980	 COPS6 -  COP9 constitutive photomorphogenic homolog subunit 6 (Arabidopsis)	1	0.07	-0.2	-0.34	0.18	0.3	-1.2	-0.4	-0.08	-0.05	-0.66	-1.09	-1.1	-0.13	-0.46	-0.29	0.04	-0.4	-1.11		0.54	0.17	-0.72	-1.77	-0.88	0.72	0.08	-0.12	-0.54	-1.8	0.29	-0.94	0.15	-0.16	0.34	-0.11
GENE246X	5937	" RBMS1 -  RNA binding motif, single stranded interacting protein 1"	1	-0.04	-0.12	-0.14	0.25	0.05	-0.15	-0.2	0.17	-0.1	-0.04	-0.37	-1.71	-0.25	0.02	0.11	0.14	0.21	-0.84	0.44	-0.34	0.06	-0.16	0.15	-0.4	0.27	0.13	-0.01	0.1	-2.04	0.29	-0.58	-0.02	0.3	0.37	-0.12
GENE364X	7334	" UBE2N -  Ubiquitin-conjugating enzyme E2N (UBC13 homolog, yeast)"	1	-0.22	-0.27	0.19	-0.02	0.31	0.04	-0.26	0.13	-0.02	-0.02	-0.02	-1.71	-0.29	-0.13	0.27	0.11	0.1	-1.77	0.22	-0.04	0.08	-0.25	-0.64	-1.03	0.19	0.4	0.41	-0.44	-1.88	0.63	-0.69	0.69	0.61	0.34	-1.07
GENE406X	91734	 IDI2 -  isopentenyl-diphosphate delta isomerase 2	1	-0.33	-0.09	0.09	0.09	0.24	-0.44	-1.19	-0.04	-0.37	-0.17	-0.69	-1.54	-0.61	-0.1	-0.06	-0.3	-0.01	-2.15	0.18	-0.21	-0.22	0.25	0.18	-0.92	0.2	0.65	0.76	-0.64	-1.37	0.02	-0.54	0.45	0.77	0.37	-1.7
GENE502X	28991	 COMMD5 -  COMM domain containing 5	1	-0.3	-0.08	0.03	0.38	-0.04	0.46	-0.18	-0.61	-0.77	-0.72	-0.08	-1.65	-0.19	-0.24	-0.28	-0.36	-0.12	-1.17	0.33	-0.4	-0.15	0.21	1.19	0.55	0.25	0.24	-0.11	0.02	-1.44	0.36	-0.07	0.29	0.32	0.21	-1.73
GENE351X	11070	 TMEM115 -  Transmembrane protein 115	1	-0.33	-0.13	0.24	0.34	-0.12	0.69	0.94	0.06	-0.22	-0.14	-0.14	-1.63	0.14	-0.02	-0.08	-0.21	0.2	-1.1	0.05	-0.44	0.07	0.32	1.1	0.02	0.15	0.47	0.21	-0.37	-2.43	0.01	0.09	0.4	0.38	0.24	-2.13
GENE1413X	29978	 UBQLN2 -  Ubiquilin 2	1	-0.1	0.13	-0.23	0	0.27	0.13	-0.02	0.04	-0.35	-0.49	-1.16	-1.51	0.34	0.29	0.14	-0.12	-0.06	-1.53	-0.23	0.2	-0.19	0.22	-0.46	-1.06	0.23	0.09	-0.55	-2.38	-3.12	-0.06	-0.31	-0.62	-0.23	-0.17	-2.64
GENE271X	205327	 C2orf69 -  Chromosome 2 open reading frame 69	1	-0.25	-0.19	0.1	0.13	0.21	0.45	0.08	0.24	0.19	0.1	-0.61	-2.19	-0.24	0.08	0.38	0.08	-0.02	-0.93	0.32	-0.44	-0.19	0.31	0.72	-0.21	0.03	0.45	0.01	-0.39	-1.95	0.16	-0.74	0.22	0.3	0.38	-1.32
GENE481X	7386	" UQCRFS1 -  Transcribed locus, moderately similar to XP_001374701.1 PREDICTED"	1	-0.3		0.12	0.23	-0.05	0.06	-0.02	-0.28	-0.13	-0.04	-0.89	-2.52	-0.27	0.04	0.04	-0.4	0.01		-0.14	-0.1	0	0.25	0.14	0.09	0.06	0.25	0	-0.47	-2.21	-0.31	-0.58	0.12	0.19	0.09	-1.6
GENE484X	3188	 HNRNPH2 -  Heterogeneous nuclear ribonucleoprotein H2 (H')	1	-0.04	-0.25	0.02	0.04	0.23	0.1	-0.24	0.14	0.17	-0.2	-0.44	-1.89	0.14	0.15	0.02	0.04	0.19	-1.05	0.14	0.1	-0.17	-0.08	-0.28	-0.46	-0.06	0.32	-0.14	-0.58	-2.15	0.25	-0.38	0.44	-0.29	-0.14	-1.66
GENE1278X	3189	 HNRNPH3 -  Heterogeneous nuclear ribonucleoprotein H3 (2H9)	1	-0.5	-0.22	0.25	0.27	0.19	0.29	0.2	0.24	0.07	0.04	-0.4	-1.75	0.3	0.53	0.41	0.06	0.37	-1	0.1	-0.2	0.03	0.07	-0.12	-0.55	0.05	0.18	-0.48	-0.87	-1.95	0.1	-0.29	0.31	0.02	-0.16	-1.44
GENE729X	401505	 TOMM5 -  Translocase of outer mitochondrial membrane 5 homolog (yeast)	1	0.1	-0.08	-0.97	0.38	0.56	0.35	0.44	0.46	0.01	0.09	-0.72	-2.68	0.16	0.4	0.44	-0.2	0.1	-1.9	-0.42	0.01	0.18	0.23	0.09	-0.37	0.01	-0.07	-0.28	-0.92	-3.46	-0.1	0.15	0.61	-0.07	-0.15	-1.41
GENE546X	5279	" PIGC -  Phosphatidylinositol glycan anchor biosynthesis, class C"	1	-0.14	-0.04	-0.37	0.38	0.16	-0.45	-0.08	0.21	0.18	-0.28	-1.63	-3.18	0.16	0.23	0.28	0.37	0.18	-1.48	-0.11	-0.84	0.62	0.33	-0.63	-1.24	0.05	-0.13	-0.69	-1.62	-3.81	-0.92	-1.86	0.41	0.17	-0.39	-2.11
GENE1131X	55958	 KLHL9 -  kelch-like 9 (Drosophila)	1	-0.05	0	0	0.04	0.02	-0.5	-1.16	-0.1	-0.59	-1.37	-1.88	-2.85	-0.01	0.08	-0.07	-0.37	-0.43	-1.57	0.29	-0.05	-0.04	-0.21	-0.25	-1.3	0	-0.05	-0.85	-1.55	-2.75	-0.34	-1.59	0.25	0	-0.41	-3.47
GENE820X	94107	 TMEM203  -  Transmembrane protein 203	1	-0.12	-0.41	0.44	0.32	-0.24	-0.91	-0.8	-0.06	-0.48	-1.09	-2.34	-3.62	-0.5	0.02	-0.29	-0.27	-0.39	-1.93	0.63	-1.01	0.21	0.16	-1.45	-1.5	-0.56	-0.81	-1.54	-2.4	-2.86	-0.18	-1.25	-0.23	-0.31	-0.94	-3.71
GENE1025X	8263	 F8A1 -  Coagulation factor VIII-associated (intronic transcript) 1	1	0.19	-0.31	0.12	-0.08	0.06	-1.39	-0.94	0.15	-0.11	-0.14	-1.24	-3.42	-0.14	0.08	-0.27	0.02	-0.08	-1.46	-0.02	-0.1	0.07	0.05	-0.66	-0.63	0.01	-0.35	-0.61	-1.08	-1.82	-0.43	-0.63	0.12	-0.19	-0.65	-2.42
GENE461X	64110	" MAGEF1 -  Melanoma antigen family F, 1"	1	0.04	-0.11	0.38	-0.15	-0.18	-0.93	0.39	0.16	-0.04	-0.57	-1.01	-1.74	0.02	0.64	0.11	-0.22	0.04	-0.32	0.03	-0.14	-0.03	0.14	1.01	0.37	0.19	0.25	-0.14	-0.61	-2.5	-0.1	-0.22	0.63	0.23	-0.06	-2.54
GENE1149X	58486	" ZBED5 -  zinc finger, BED-type containing 5"	1	-0.12	-0.12	0.32	0.04	-0.12	-0.2	0.32	-0.28	-0.23	-0.57	-1.47	-1.87	0.19	0.32	0.01	-0.24	0.29	-0.15	-0.22	-0.49	0.17	0.54	-0.2	-0.1	-0.05	0.12	-0.95	-0.77	-1.98	-0.37	-0.55	0.5	0.12	-0.67	-2.88
GENE404X	84247	" LDOC1L -  leucine zipper, down-regulated in cancer 1-like"	1	-0.46	0.05	0.26	0.24	-0.1	0.08	0.58	0.1	-0.45	-0.61	-0.88	-1.88	0.14	0.41	0.03	-0.7	-0.07	-0.5	-0.13	-0.77	0.45	0.46	-0.1	-0.01	-0.07	0.13	-0.74	-0.63	-1.6	-0.64	-1.12	0.4	0.53	-0.48	-2.24
GENE966X	23020	 SNRNP200 -  Small nuclear ribonucleoprotein 200kDa (U5)	1	-0.23	0.3	-0.06	0.21	-0.22	-0.64	-0.71	-0.15	-0.21	-0.13	-1.29	-2.02	-0.17	-0.42	-0.03	-0.19	-0.27	-0.62	0.59	-0.58	0.21	-0.11	-0.15	-0.79	-0.37	-0.51	-0.91	-0.57	-1.63	-0.48	-1.02	-0.01	-0.31	-0.45	-1.41
GENE648X	55970	" GNG12 -  Guanine nucleotide binding protein (G protein), gamma 12"	1	-0.41	0.13	0.22	0.12	-0.05	-0.42	-0.82	-0.32	-0.5	-0.84	-1.32	-1.8	-0.22	0.22	0.21	-0.36	0.22	-0.59	0.05	-0.08	-0.32	0.36	0.18	-0.97	-0.3	0.14	-0.39	-0.5	-2.05	0.42	-0.29	0.27	-0.04	-0.22	-0.47
GENE1311X	283377	 SPRYD4 -  SPRY domain containing 4	1	0.02	-0.16	0.06	0.08	0.01	-0.89	-0.32	-0.04	-0.26	-0.45	-1.16	-2.57	-0.38	-0.04	-0.07	-0.42	0.09	-0.93	-0.04	-0.6	0.05	0.6	0.01	-0.68	0.05	0.13	0.35	-0.3	-1.73	0.69	0.38	0.6	0.31	-0.16	-1.65
GENE962X	1350	 COX7C -  Cytochrome c oxidase subunit VIIc	1	-0.01	-0.23	0.22	0.02	0.01	-0.58	-0.45	-0.06	-0.4	0.27	-0.87	-1.64	-0.25	0.12	-0.13	-0.55	-0.05	-1.06	-0.14	-0.13	0.04	0.22	0.35	-0.07	0.38	0.11	0.1	-0.07	-1.69	0.42	0.24	0.58	0.44	-0.04	-0.44
GENE1033X	4257	 MGST1 -  Microsomal glutathione S-transferase 1	1	-0.03	-0.2	0.23	-0.04	0.06	-0.26	0.24	0	-0.23	-0.17	-1.02	-2.06	0	0.31	-0.08	-0.28	-0.3	-0.98	0.28	-0.01	-0.23	-0.03	-0.59	-0.35	-0.17	-0.02	-0.42	-0.73	-1.84	0.27	0.74	0.42	-0.13	-0.43	-0.52
GENE839X	7259	 DSE -  Dermatan sulfate epimerase	1	-0.22	-0.16	0.22	0.1	0.06	0.46	0.44	-0.67	0.13	-0.33	-0.56	-0.96	0.6	0.77	0.18	-0.06	0.49	0.29	-0.4	-0.31	0.05	0.69	0.61	-0.13	0.27	0.69	0.14	-0.7	-2.4	0.17	0.44	0.7	0.24	0.53	-1.66
GENE1320X	10430	 TMEM147 -  Transmembrane protein 147	1	-0.42	0.08	-0.37	0.16	0.55	-1.32	-0.72	-0.28	0.03	0.12	-1.35	-1.21	-0.19	-0.17	-0.28	-0.28	0.09	-0.79	0.19	-1.02	0.51	0.33	0.18	0.11	0.55	0.01	-0.79	-1.59	-1.74	-0.1	-0.67	0.64	0.4	0.46	-0.26
GENE625X	8195	 MKKS -  McKusick-Kaufman syndrome	1	0.38	0.28	-0.98	0.22	0.11	-1.26	0.19	0.18	0.02	0.14	-0.7	-0.7	-0.3	-0.01	-0.18	0.09	0.27	-1.52	-0.81	-0.81	1	0.62	-1.75	0.06	0.55	-0.14	-1.42	-2	-2.21	-0.77	-0.89	0.62	0.37	0.19	-0.08
GENE305X	59	" ACTA2 -  Actin, alpha 2, smooth muscle, aorta"	1	0.45	0.25	-1.07	0.41	-0.02	0.11	-0.03	0.05	0.05	0.31	-0.25	-0.87	0.62	0.72	0.08	-0.03	0.38	-0.07	-0.7	-0.28	0.56	0.44	-0.67	-1.71	0.47	0.22	-0.12	-0.69	-2.73	0.14	-1.01	0.47	0.38	0.28	0.6
GENE224X	7078	 TIMP3 -  TIMP metallopeptidase inhibitor 3	1	-0.23	0.24	-0.37	0.26	0.1	-0.04	0.15	0.47	-0.04	0.89	0.04	-1.25	1.6	2.42	0.01	-0.02	0.97	-0.11	-0.42	-0.32	0.32	0.41	0.47	-1.93	0.25	0.13	0.25	-1.41	-2.98	-0.04	-0.78	-0.19	0.26	0.69	0.97
GENE1287X	2907	" GRINA -  Glutamate receptor, ionotropic, N-methyl D-aspartate-associated protein 1 (glutamate binding)"	1	-0.55	-0.17	0.34	0.05	0.32	-2.01	-1.7	0.53	-0.12	0.45	-0.55	-1.9	0.29	-0.25	-0.31	-0.34	-0.17	-0.39	-0.05	0.04	-0.35	0.36	-0.68	-0.74	-0.01	-0.41	-0.55	-1.64	-1.5	0.79	0.34	-0.56	-0.89	-0.31	-0.5
GENE197X	2252	 FGF7 -  Fibroblast growth factor 7 (keratinocyte growth factor)	1	0.46	0.06	0.13	-0.27	-0.38	0.15	0.45	0.23	-0.32	-0.5	0.1	0.4	-0.31	-0.21	0	0.3	-0.26	-0.08	0.49	-1.61	0.94	0.17	-1.15	-2.55		-0.75	-0.12	-1.11	-4.24	-0.29	0.98	0	-1.14	1.24	-0.29
GENE568X	8613	 PPAP2B -  Phosphatidic acid phosphatase type 2B	1	0.12	0.37	-0.56	0.55	-0.47	-1.45	-1.38	-0.1	-1.25	-0.55	-0.17	-0.85	-0.38	-0.5	-0.37	-0.82	-0.32	1.55	-0.18	-0.34	0.31	0.22	-1.73	-3.42	0.16	-0.31	-0.65	-1.82	-3.86	-0.06	-0.65	0.23	-0.15	-0.04	0.09
GENE356X	51280	 GOLM1 -  Golgi membrane protein 1	1	-0.61	-0.19	0.51	0.3	0	0.22	0.45	0.6	0.03	0.47	0.42	0.1	0.3	0.62	0.68	0.14	-0.13	0.46	-0.04	-0.66	0.22	0.48	-1.06	-1.72	0.43	0.06	-0.11	-0.78	-1.42	0.67	2.23	-1.13	0.15	1.09	0.03
GENE222X	4232	 MEST -  Mesoderm specific transcript homolog (mouse)	1	0.19	0.16	-0.06	-0.15	-0.13	0.78	1.99	0.27	-0.16	1.14	0.56	-1.02	-0.1	1	0.21	-0.6	1.3	1.11	-0.05	-0.8	0.44	0.41	-1.69	-2.92	-0.5	-0.16	-0.12	-1.92	-1.01	1.12	0.98	0.01	-0.01	-0.44	0.77
GENE1343X	4008	 LMO7 -  LIM domain 7	1	0.04	0.42	-0.08	0.04	-0.21	0.3	0.74	0.42	-0.11	0.35	0.39	0.13	0.24	0.57	0.58	-0.39	0.95	1.18	-0.71	-0.44	0.39	0.77	-1.92	-2.56	0.43	0.77	0.02	-1.34	-0.73	1.24	2.04	0.42	0.29	0.08	-0.77
GENE805X	1528	 CYB5A -  Cytochrome b5 type A (microsomal)	1	-0.56	-0.32	0.33	0.28	0.27	-1.81	-1.74	0.27	-0.28	-0.39	-1.01	-1.99	1.61	1.9	0.26	-0.01	-0.06	2.32	0.13	-0.36	-0.18	0.4	-0.93	-2.85	-0.03	0.02	-0.04	-1.21	-2.3	0.65	1.71	0.17	0.16	-0.2	0.2
GENE76X	23338	 PHF15 -  PHD finger protein 15	1	-0.44	-0.09	0.19		0.34	-1.35	-0.83	0.28	-0.25	-0.17	-0.17	-1.52	0.62	0.77	0.16	-0.12	0.1	1.1	-0.15		-0.04	0.19		-2.2	-0.08	-0.1	-0.71	-1.9	-1.85	0.98	0.86	0.07	-0.33		-0.51
GENE1247X	3140	" MR1 -  Major histocompatibility complex, class I-related"	1	-0.22	-0.2	0.21	0.28	-0.07	-0.63	-0.2	-0.56	0.03	0.16	-0.59	-0.33	0.33	0.39	-0.15	-0.19	0.15	1.53	0.09	-0.19	-0.44	0.54	-0.62	-1.68	0.03	-0.23	-0.25	-1.11	-1.96	0.75	1.18	-0.23	-0.41	-0.54	0.19
GENE447X	2628	 GATM -  Glycine amidinotransferase (L-arginine	1	-0.15	-0.41	-0.22	0.44	0.35	-0.42	-1.14	0.27	0.1	0.13	-0.3	-1.2	1.08	0.57	-1.07	-0.58	0.06	0.35	-0.13	0.68	-0.29	-0.26	-1.95	-2.16	-0.42	-0.52	-1.08	-1.89	-2.83	-0.46	0.4	-1.27	-0.56	-1.26	-1.05
GENE1239X	4047	" LSS -  lanosterol synthase (2,3-oxidosqualene-lanosterol cyclase)"	1	-0.12	-0.1	0.26	-0.05	-0.03	-0.58	-1.2	-0.17	-0.28	0.12	-0.31	-1.07	0.76	0.36	-0.5	-0.22	0.02	0.35	-0.07	-0.08	-0.07	0.21	-1.31	-1.89	-0.21	-0.28	-0.38	-2.15	-1.73	-0.59	0.44	-0.39	-0.43	-0.66	-0.54
GENE1209X	994	 CDC25B -  Cell division cycle 25 homolog B (S. pombe)	1	-0.3	-0.41	0.28	0.17	0.26	-1.09	-0.72	0.01	-0.01	-0.43	-0.87	-1.08	0.2	0.13	-0.09	-0.03	0.06	0	-0.37	0.27	-0.02	0.12	-2.23	-1.33	-0.01	-0.36	-1.16	-2.57	-2	0.2	-0.06	-0.3	-0.28	-0.7	-0.03
GENE1505X	29929	" ALG6 -  Asparagine-linked glycosylation 6, alpha-1,3-glucosyltransferase homolog (S. cerevisiae)"	1	-0.24	-0.14	0.13	0.07	0.18	-0.99	0.1	-0.1	-0.34	-0.81	-1.37	-1.31	0.27	0.36	0.18	-0.23	-0.46		0.22	0.14	-0.24	-0.13	-2.63	-2.1	-0.07	-0.31	-0.94	-1.92	-2.47	0.04	0.02	0	-0.37	-0.83	-0.79
GENE1406X	140691	 TRIM69 -  Tripartite motif-containing 69	1	-0.8	-0.2	0.28	0.27	0.44	-1	-0.75	0.07	-0.2	-0.63	-1.04	-2.11	0.69	0.25	-0.5	-0.85	-0.68	-0.9	-0.18	0.24	-0.36	0.31	-1.34	-1.5	0.28	-1.01	-0.86	-2.58	-2.73	0.78	1	-0.9	-0.59	-0.93	-0.52
GENE1330X	2650	" GCNT1 -  Glucosaminyl (N-acetyl) transferase 1, core 2"	1	0.02	-0.11	0.13	0.07	-0.1	-1.06	-1.1	0.2	0.06	-0.33	-0.89	-0.78	-0.68	0.06	0.08	0.25	-0.57	-0.99	0.58	-0.81	0.19	0.04	-2.32	-1.53	-0.33	-0.4	-1.42	-1.89	-3.16	0.86	1.18	0.02	-0.31	-0.84	-1.9
GENE1310X	4211	 MEIS1 -  Meis homeobox 1	1	-0.17	0.39	0.09	-0.25	-0.06	0.01	0.46	0.17	-0.56	-0.06	-0.32	-0.56	-0.42	0.37	-0.37	-0.1	0.03	-1.32	0.4	-0.65	0.41	-0.16	-2.21	-1.22	0.41	-0.77	-0.62	-1.41	-1.95	1.04	1.14	0.41	-0.46	0.06	-1.29
GENE1544X	3667	 IRS1 -  Insulin receptor substrate 1	1	-0.22	-0.21	0.69	-0.04	-0.24	-0.3	-0.07	-0.37	-0.37	-0.19	-0.12	-0.09	-0.15	-0.19	-0.47	-0.5	0.18	0.15	0.45	-0.14	-0.05	-0.25	-3.18	-1.39	0.06	-0.17	-0.79	-1.55	-2.14	0.62	0.63	-0.39	-0.4	-0.39	-1.46
GENE1517X	133	 ADM -  Adrenomedullin	1	-0.21	0.04	0.18	0.05	-0.06	0.49	0.07	0	-0.04	1.01	1.01	0.28	-0.04	-0.5	-0.28	-0.27	-0.1	0.5	-0.12	-0.05	0.28	-0.16	-2.64	-2.19	0.09	-0.16	-0.88	-2.23	-3.02	1.23	1.06	-0.03	-0.23	-0.08	-0.32
GENE468X	874	 CBR3 -  Carbonyl reductase 3	1	-0.34		0.17	0.24	-0.07	-1.32	-0.36	-0.27	-0.17	0.46	0.6	-0.93	-0.02	0.15	-0.12	-0.14	0.68	0.23	-0.08	-0.06	-0.04	0.18	-2.2	-1.86	-0.03	0.29	-0.17	-1.84	-3.1	1.09	0.4	-0.23	0.28	0.21	-1.16
GENE1315X	5939	" RBMS2 -  RNA binding motif, single stranded interacting protein 2"	1	-0.13	0.33	-0.06	-0.29	0.15	-0.44	-0.16	0.17	0.15	0.08	-0.32	-0.61	0.09	-0.18	0.09	-0.08	0.05	-0.32	-0.33	0.23	0.02	0.16	-1.26	-1.13	0.18	-0.06	-0.98	-1.74	-2.55	1.16	1.34	-0.27	-0.21	-0.1	-0.12
GENE1708X	2040	 STOM -  Stomatin	1	-0.14	-0.11	0.08	0.12	0.05	-0.65	-0.51	-0.02	-0.01	-0.22	-0.38	-0.96	-0.22	-0.37	0.18	0.16	0.09	-0.31	0.2	-0.15	-0.09	0.04	-1.39	-1.85	0.29	0	-0.5	-0.38	-1.88	0.81	0.75	0.05	-0.39	-0.18	-0.08
GENE307X	1123	 CHN1 -  chimerin (chimaerin) 1	1	0	-0.03	-0.02	0	0.06	0.14	0.01	-0.2	-0.21	-0.21	0.13	0.3	0.16	-0.54	-0.15	0.2	0.23	-0.55	0.58	-0.7	0.25	-0.14	-2.61	-3.58	0.02	0.24	-0.17	-0.78	-3.65	1.21	0.52	-0.06	-0.6	0.87	0.75
GENE1300X	6324	" SCN1B -  Sodium channel, voltage-gated, type I, beta"	1	-0.35	-0.04	0.65	-0.26	0.01	-0.09	-0.42	0.02	-0.09	0.22	0.25	0.32	0.07	0.77	0.11	-0.03	-0.3	0	-0.05	-0.17	-0.19	0.4	-0.44	-1.73	0.23	-0.05	-0.25	-1.25	-1.62	0.25	0.62	-0.12	0.03	-0.23	0
GENE177X	4982	" TNFRSF11B -  Tumor necrosis factor receptor superfamily, member 11b"	1	-0.13	0.15	0.83	-0.55	-0.3	0.11	0.95	0.44	-0.07	0.68	0.73	-0.58	-0.08	0.34	0.25	-0.7	0.06	-0.47	-0.23	-0.46	0.5	0.19	-0.78	-3.58	0.31	-0.01	-0.13	-1.04	-2.94	1.62	2.3	0.32	-0.04	-0.36	-0.35
GENE75X	4060	 LUM -  Lumican	1	-0.76		0.75	0.01	0	0.81	0.68	-0.09	-0.14	0.14	0.52	-0.17	0	0.62	-0.29	-0.68	0.34	-0.22	0.12	-0.16	-0.14	0.19		-2.55	-0.07	0.07	-0.4	-1.21	-3.23	0.85	1.74	-0.17	0.12	-0.36	0.07
GENE842X	10410	 IFITM3 -  Interferon induced transmembrane protein 3 (1-8U)	1	0.04	-0.03	0.04	0.11	-0.14	-0.12	-0.01	0.28	-0.35	0.25	-0.13	-0.88	0.1	0.92	0.05	-0.44	0.16	-0.51	0.22	-0.37	-0.17	0.31	-0.19	-1.79	-0.2	0.29	-0.06	-0.85	-2.1	0.22	0.68	0.23	-0.25	-0.31	-0.55
GENE459X	9582	" APOBEC3B -  Apolipoprotein B mRNA editing enzyme, catalytic polypeptide-like 3B"	1	0.05	-0.5	-0.21	1.33	-0.68	-0.89	-0.28	-0.73	-0.48	-0.07	-0.21	-1.28	-0.62	-0.13	-0.91	0.04	-1.02	-0.96	0.14	-0.26	0.3	-0.18	-2.19	-3.39	-0.11	-0.3	-0.78	-1.73	-2.78	0.57	0.74	0.32	0.24	-0.54	-0.92
GENE601X	966	" CD59 -  CD59 molecule, complement regulatory protein"	1	-0.22	-0.03	-0.09	0.24	0.11	0.98	0.74	-0.01	-0.17	-0.3	0.37	-0.8	0.11	0.02	-0.4	-0.21	-0.22	-0.85	0.23	-0.25	0.31	-0.3	-1.05	-2.07	-0.16	-0.45	-0.55	-1.24	-2.51	0.68	-0.01	-0.14	-0.07	-0.26	-0.54
GENE1481X	4061	" LY6E -  Lymphocyte antigen 6 complex, locus E"	1	0.35	-0.11	0.05	-0.28	-0.01	-0.47	-0.47	-0.34	-0.13	-0.16	-0.17	-0.81	0.23	0.33	-0.22	-0.16	0.3	-0.87	-0.18	-0.02	-0.21	0.41	-1.37	-2.31	-0.04	-0.51	-0.81	-1.65	-1.05	0.57	0.64	-0.73	-0.81	-0.4	-0.65
GENE74X	10721	" POLQ -  Polymerase (DNA directed), theta"	1	-0.32	-0.61	1.26	-0.26	-0.08	-0.39	-0.24	-0.31	-0.55	0.42	-0.18	-0.72	0.37	0.99	-0.63	-0.51	-0.12	0.61	0.01	0.26	0.03	-0.31	-1.83	-2.31	0	-0.31	-0.14	-1.4		0.41	0.19	-0.23	-0.73	-0.75	-0.92
GENE1786X	24138	 IFIT5 -  Interferon-induced protein with tetratricopeptide repeats 5	1	0.06	-0.23	-0.18	0.28	0.06	-0.52	-0.21	-0.08	-0.05	-0.36	-0.7	-1.26	0.18	0.15	-0.54	-0.22	-0.62	-1.53	0.34	-0.44	0.29	-0.2	-1.81	-1.43	-0.43	-0.46	-1.68	-2.31	-2.15	0.49	0.06	-1.39	-1.05	-0.66	-1.7
GENE373X	80128	 TRIM46 -  Tripartite motif-containing 46	1	-0.69	0.25	-0.2	0.13	0.53	-0.09	0.15	0.1	-0.18	-0.29	0.11	-0.19	1.17	-0.42	-1.07	-1.26	-0.48	-0.18	0.09	0.38	-0.56	0.09	-1.21	-1.74	0.12	-1.08	-0.93	-2.62	-0.64	2.15	2.32	-0.77	-1.25	-0.51	0.05
GENE1334X	441108	 C5orf56 -  chromosome 5 open reading frame 56	1	-0.83	-0.23	0.27	0.24	0.56	0.26	0	0.34	-0.04	-0.26	0.3	0.29	0.39	-0.28	-0.61	-0.73	-0.55	-0.32	0.16	0.37	-0.7	0.18	-0.97	-0.5	0.12	-1.23	-0.63	-1.61	-1.68	1.42	1.26	-0.92	-0.76	-0.89	0.27
GENE1717X	3601	" IL15RA -  Interleukin 15 receptor, alpha"	1	0.29	0.04	-0.02	-0.15	-0.15	0.35	0.32	-0.03	0.05	0.06	0.58	0.83	0.29	-0.24	-0.27	-0.31	-0.29	-0.19	0.51	-1.01	0.34	0.16	-0.88	-0.76	-0.52	-0.73	-0.93	-1.84	-1.68	1.14	1.41	-0.17	-0.09	-0.38	0.29
GENE1259X	834	" CASP1 -  Caspase 1, apoptosis-related cysteine peptidase (interleukin 1, beta, convertase)"	1	-0.03	-0.11	-0.51	0.32	0.33	1.27	0.96	0.21	0.34	-0.49	0.27	1.03	0.99	0.69	-0.05	-0.04	-0.61	0.69	0.48	-0.37	0.13	-0.12	-0.7	-0.7	0.04	-0.35	-0.94	-0.8	-2.32	1.92	2.24	0.03	-0.31	-0.57	-0.21
GENE403X	2116	 ETV2 -  Ets variant 2	1	-0.47	0.06	-0.04	0.15	0.3	0.47	0.35	-0.24	-0.02	-0.35	0.98	1.17	0	-0.25	-0.53	-0.39	-0.18	0	0.42	0.31	-0.07	-0.65	-1.97	-1.58	0	-0.45	-0.42	-0.47	-3.05	1.71	1.44	0.55	-0.68	-0.4	-0.4
GENE1128X	843	" CASP10 -  Caspase 10, apoptosis-related cysteine peptidase"	1	0.1	-0.14	-0.04	0.23	-0.14	0.27	0.28	-0.28	-0.36	0.01	0.15	0.31	0.47	-0.17	0.01	-0.23	-0.1	-0.04	0.3	-0.11	0.23	-0.63	-0.13	-0.08	0.1	-0.58	0.21	-0.42	-1.92	1.5	1.71	0.12	-0.18	0.5	0.74
GENE1540X	9536	 PTGES -  Prostaglandin E synthase	1	0.02	0.14	0.25	-0.25	-0.14	-0.02	-0.39	0.06	-0.06	-0.05	-0.19	-0.5	0.19	0.15	0.04	0.17	0.01	-0.15	-0.19	-0.86	0.45	0.39	0.17	0.01	0.37	0.38	-0.24	-0.83	-1.76	1.09	1.81	0.44	0.41	0.7	0.31
GENE573X	11277	 TREX1 -  three prime repair exonuclease 1	1	-0.07	-0.06	-0.67	0.65	0.14	-0.47	-0.65	-0.38	-0.08	-0.01	-1.2	-2.43	-0.19	-0.44	-0.45	-0.31	0.25	-2.46	-0.18	-0.81	0.13	0.85	-0.24	-0.97	0.3	0.24	0.01	-0.56	-1.74	2.09	2.38	0.05	0.17	0.07	-1.11
GENE414X	401152	 C4orf3  -  chromosome 4 open reading frame 3	1	0	0.03	0.2	-0.51	0.27	-0.39	0.03	0.44	0.19	-0.08	-1.02	-2.28	-0.04	-0.44	0.24	0.52	-0.07	-2.35	0.13	-0.35	0.76	-0.53	-2.1	-1.82	0.5	-0.09	-0.69	-1.55	-2.58	1.36	1.36	0.9	0.8	0.22	-0.65
GENE763X	9935	 MAFB -  v-maf musculoaponeurotic fibrosarcoma oncogene homolog B (avian)	1	-0.61	-0.05	0.18	0.37	0.11	0.57	-0.14	0.32	-0.14	0.69	-0.57	-1.6	-0.07	-0.59	0.4	0.28	-0.19	-0.96	0.27	-0.54		0.27	-0.97	-1.39	0.49	0.85	0.58	-0.7	-2.01	0.24	1.57	0.67	0.79	0.27	-0.59
GENE437X	23052	 ENDOD1 -  Endonuclease domain containing 1	1	-0.07	-0.52	0.35	0.07	0.18	0.54	1.59	0	0.19	0.17	0.39	-0.97	0.18	0.5	-0.02	-0.11	0.39	-1.19	-0.85	0.7	-0.09	0.16	-0.64	-1.45	-0.23	-0.44	-0.79	-1.93	-0.6	0.46	0.57	-0.64	-0.4	0.06	-0.52
GENE973X	1906	 EDN1 -  Endothelin 1	1	0.18	0.16	0.43	-0.42	-0.34	3.24	1.87	0.31	0.08	1.58	1.67	0.07	-0.42	0.38	0.07	-0.02	-0.28	-0.51	0.19	-0.2	0.1	-0.1	-2.19	-2.7	0.95	0.15	-1.12	-2	-1.84	2.03	2.37	1.04	0.97	0.31	-1.92
GENE1865X	10758	 TRAF3IP2  -  TRAF3 interacting protein 2	1	-0.06	0.08	-0.1	-0.04	0.11	1.56	2.14	0.04	0.27	0.18	0.48	0.54	-0.35	-0.21	-0.26	0.76	0.09	-1.81	0.39	-0.16	0.41	-0.63	-1.99	-2.03	0.04	-0.89	-0.22	-0.85	-1.1	0.48	0.34	0.51	0.34	-0.06	-0.34
GENE1513X	85439	 STON2 -  Stonin 2	1	-0.37	-0.02	-0.02	0.04	0.37	0.25	0.56	0.06	0.01	-0.62	0.38	0.07	-0.16	-0.4	-0.9	-0.54	-0.11	-0.74	0.33	0.09	-0.01	-0.41	-2.91	-1.87	0.02	-0.6	-1.25	-1.95	-0.24	-0.3	-0.64	-0.7	-0.82	-1.13	-2.05
GENE551X	115572	" FAM46B -  Family with sequence similarity 46, member B"	1	0.01	-0.2	0.91	-0.49	-0.25	0.38	0.17	-0.03	-0.22	0.22	0.94	0.42	-0.24	0.22	-0.43	-0.03	0.56		-0.2	-0.17	-0.08	0.45	-0.93	-1.97	0.44	0.2	-0.49	-1.47	-0.36	-0.82	0.23	-0.09	-0.09	-1.02	-1.77
GENE585X	924	 CD7 -  CD7 molecule	1	0.2	0.31	-0.3	-0.74	0.53	-0.5	-0.19	-0.16	-0.03	0.13	0.49	-0.02	0.15	-0.26	-0.24	0.68	0.43	-0.65	0.25	-1.16	0.59	0.33	-2.53	-1.38	0.46	-0.52	-1.19	0.2	-2.92	-1.45	-1.46	0.32	-0.11	0.11	0.04
GENE797X	8399	" PLA2G10 -  phospholipase A2, group X"	1	-0.09	-0.04	0.29	0.11	-0.26	0.31	0.86	0.4	-0.12	-0.05	-0.26	-0.08	0.59	0.35	0.09	0.87	0.53	0.64	-0.33	-0.59	1	-0.09	-0.98	0.06	0.08	0.27	0.91	-1.74	-2.96	1.13	0.31	0.48	0.14	0.43	-1.56
GENE254X	1601	" DAB2 -  Disabled homolog 2, mitogen-responsive phosphoprotein (Drosophila)"	1	0.07	0	-0.2	0.15	-0.01	0.68	0.16	-0.31	-0.26	-0.57	0.18	-0.45	0.29	0.06	-0.16	0.17	0.12	0.35	0.19		-0.08	-0.14	-1.69	-0.44	0.51	-0.1	-0.47	-0.51	-1.19	0.46	-1.44	-0.24	-0.32	0.14	-1.69
GENE186X	4017	 LOXL2 -  Lysyl oxidase-like 2	1	0.21	-0.07	0.5	-0.6	-0.04	0.17	0.32	0.09	0.23	0.19	1.16	0.78	0.03	1.57	0.2	-1.09	-0.6	1.11	-0.05	-0.64	0.05	0.65	0.1	-2.17	0.11	0.23	0.07	-0.53	-3.45	0.56	-0.36	0.32	0.95	-0.09	-0.38
GENE244X	6695	" SPOCK1  -  sparc/osteonectin, cwcv and kazal-like domains proteoglycan (testican) 1"	1	0.63	0.04		-0.5	-0.17	0.85	0.56	0.74	0.47	0.44	0.95	0.23	-0.23	1.77	0.65	-0.73	-0.16	1.1	-0.09	-0.51	0.22	0.38	0.16	-0.81	0.25	0.03	-0.23	-0.25	-2.44	0.68	0.14	0.47	0.31	-0.14	-0.19
GENE228X	8406	" SRPX -  Sushi-repeat-containing protein, X-linked"	1	-0.54	-0.16	1.2	-0.59	0.07	0.83	-0.17	0.05	0.67	0.9	0.75	0.16	0.63	1.89	-0.43	-0.51	0.07	0.51	-0.67	0	-0.06	0.72	0.74	-0.37	0.18	0.12	-0.34	-0.23	-1.98	-0.09	-0.66	0.31	-0.03	-0.22	-0.14
GENE591X	1041	 CDSN -  Corneodesmosin	1	-0.91	0.06	0.22	-0.44	1.05	0.39	0.31	-0.21	0.82		0.28	-0.17	-0.37	0.09	-1.19	-1.13	-0.33	-1.82	-0.35	1.21	-0.56	-0.3	-0.33	0.18	-0.42	-0.63	0.04	-0.74	-2.04	-0.3	0.21	0.14	0.62	-0.3	-0.02
GENE1268X	10406	 WFDC2 -  WAP four-disulfide core domain 2	1	-1.85	-0.07	1.04	-0.38	1.25	0.12	0.48	-0.17		0.01	0.58	0.17	0.57	0.19	-1.18	-1.01	-0.12	-1.69	-0.08	1.62	-0.79	-0.76	-0.37	-0.13	0.05	-0.55	0.29	-0.67	-0.68	-0.07	0.07	-0.73	-0.44	-0.85	0.94
GENE637X	10551	 AGR2 -  Anterior gradient homolog 2 (Xenopus laevis)	1	-0.8	0.17	1.4	-0.23	-0.56	0.53	1.37	1.16	-0.2	0.73	1.2	-0.43	-0.32	-0.03	-0.31	-0.31	-0.26	-1.2	-0.35	-0.34	0.5	0.2	-0.25	0.88	0.4	0.81	0.5	0.86	0.41	0.85	0.54	1.94	1.73	0.71	0.62
GENE1017X	96626	 LIMS3 -  LIM and senescent cell antigen-like domains 3	1	1.16	0.46	0.5	-2.58	0.48	0.66	0.73	0.75	0.76	0.91	0.02	0.23	-0.92	-0.87	0.84	1.31	0.64	-0.68	0.23	-0.43	0.58	-0.38	0.72	0.23	0.7	1.16	1.68	1.19	1.38	0.58	-0.46	1.01	2	2.41	0.01
GENE957X	10276	 NET1 -  Neuroepithelial cell transforming 1	1	0.86	0.27	-0.18	-0.57	-0.37	-0.48	0.3	0.43	0.71	0.4	0.13	0.25	-0.86	-0.39	1.09	0.49	0.62	-0.29	-0.5	-0.62	0.6	0.51	-0.67	-0.92	0	2.61	1.49	-0.88	-1.97	0.6	0.02	0.54	1.73	1.23	0.14
GENE513X	1880	 GPR183 -  G protein-coupled receptor 183	1	0.3	-0.17	-0.75	0.52	0.2	-0.28	-1.48	0.67	1.06	1.87	0.52	-1.13	-0.21	-0.84	1.11	1.69	0.28	-0.31	0.37	-0.44	0.29	-0.23	-0.17	-0.87	0.25	1.36	2.22	-0.39	-0.67	0.35	-0.13	-0.05	0.75	1.62	-0.3
GENE1008X	8553	" BHLHE40 -  Basic helix-loop-helix family, member e40"	1	-0.09	-0.41	0.34	0.17	0	1.59	1.02	0.19	0.4	1.96	-0.2	0.98	-0.07	0.34	0.65	0.36	-0.14	1.26	0.5	-1	0.23	0.28	-0.88	-0.14	0.47	1.85	1.17	-0.09	-0.38	-0.09	-0.61	0.69	1.94	0.25	0.05
GENE326X	5553	" PRG2 -  Proteoglycan 2, bone marrow (natural killer cell activator, eosinophil granule major basic protein)"	1	0.25	0.55	-0.45	-0.22	-0.15	1.9	1.01	0.31	0.69	1.63	0.34	1.46	-0.07	-1.07	0.21	0.2	0.99	-0.31	-0.57	-0.56	0.75	0.39	1.06	1.08	0.91	0.21	0.14	-0.93	-0.26	-0.05	0.27	1.21	1.06	1.25	2.75
GENE1649X	6446	 SGK1 -  Serum/glucocorticoid regulated kinase 1	1	-0.33	-0.36	0.59	0.03	0.07	1.07	0.64	-0.24	-0.44	0.45	1.02	0.68	-0.16	0.49	-0.12	-0.31	0.06	0.2	-0.23	-0.1	0.3	-0.02	0.27	-0.04	0.54	0.23	1.85	0.77	-0.16	0.64	1.09	0.46	0.72	-0.72	1.99
GENE795X	7784	 ZP3 -  zona pellucida glycoprotein 3 (sperm receptor)	1	-0.32	-0.05	0.31	0.06	-0.02	0.55	0.61	0.3	0.04	0.34	0.54	0.59	0.03	-0.13	0.11	-0.45	-0.03	0.27	0.14	-1	0.25	0.62	-0.01	-0.67	-0.32	-0.22	-0.41	-0.14	-1.05	0.4	1.64	0.38	0.46	-0.12	1.77
GENE264X	7474	" WNT5A -  wingless-type MMTV integration site family, member 5A"	1	0.22	-0.04	0.28	-0.44	-0.17	0.73	0.8	-0.34	0.11	0.03	0.55	-0.19	-0.53	-0.69	-0.39	-0.34	-0.02	-0.22	0.22	0.02	0.14	-0.33	0.37	-0.75	0.15	0.14	-0.19	-0.03	-1.64	0.47	1.66	0.23	0.15	0.1	0.35
GENE353X	595	 CCND1 -  Cyclin D1	1	0.41	0.43	-0.67	-0.22	0.07	0.41	1.82	-0.14	-0.47	-0.21	0.15	0	0.36	0.6	-0.09	-0.26	-0.18	-0.27	-0.62	-0.12	0.4	0.34	-0.67	-1.48	0.48	1.2	0.73	-0.29	-2.36	1.46	0.2	0.31	0.58	0.52	0.47
GENE376X	5420	 PODXL -  podocalyxin-like	1	-0.56	-0.02	0.92	-0.23	-0.12	1.61	1.68	-0.54	-0.23	0.45	0.79	0.57	-0.64	0.21	-0.33	-0.68	-0.55	-0.23	0.17	-0.37	-0.28	0.47	-0.31	-1.45	-0.58	1.42	1.73	-0.31	-1.98	2.02	0.83	0.09	0.9	1.34	1.52
GENE1251X	26585	" GREM1 -  Gremlin 1, cysteine knot superfamily, homolog (Xenopus laevis)"	1	0.3	0.05	-0.2	-0.21	0.06	1.81	1.74	-0.14	-0.22	0.03	0.71	0.35	0.06	0.28	0	-0.17	0.02	-0.47	0.16	-0.14	0.19	-0.2	-0.67	0.01	0.31	0.17	0.07	0.71	-0.74	0.91	-0.24	-0.39	0.54	0.83	0.89
GENE330X	80149	 ZC3H12A -  zinc finger CCCH-type containing 12A	1	-0.6	0.1	-0.08	0.06	0.52	0.92	0.38	0.83	0.71	1.5	1.51	1.17	0.2	-0.91	-0.54	-0.01	-0.18	-0.02	0.1	0.27	-0.37	0.01	-1.41	-1.36	0.59	0.95	-0.14	-1.72	-0.37	2.15	2.7	0.19	1.96	0.9	0.19
GENE1137X	7124	" TNF -  Tumor necrosis factor (TNF superfamily, member 2)"	1	-0.31	-0.1	-0.19	0.41	0.18	2.03	0.47	-0.63	0.26	1.4	1.05	0.35	-0.16	-0.77	-0.26	0.28	0.46	-1.26	0.07	0.07	0.03	-0.16	-0.46	-0.51	-0.17	-0.25	-0.37	-0.46	1.21	2	1.45	-0.26	-0.28	1.63	0.14
GENE786X	114614	 MIR155HG -  MIR155 host gene (non-protein coding)	1	0.26	0.26	-0.34	-0.38	0.19	3.19	2.32	0.69	0.58	1.51	2.17	1.59	0.35	0.16	0.41	0.39	0.39	-1.46	0.35	-0.68	0.36	-0.04	-1.11	-0.68	0.41	-0.24	0.07	0.44	1.77	2.87	2.04	-0.12	0.05	2.43	-0.05
GENE1004X	80176	 SPSB1 -  SplA/ryanodine receptor domain and SOCS box containing 1	1	-0.1	-0.14	-0.16	0.09	0.3	1.78	1.18	0.37	0.25	1.36	1.52	0.25	0.71	0.42	-0.03	0.8	0.55	1.14	0.17	0.49	-0.05	-0.61	0.48	0.58	0.32	1.26	1.41	1.17	1.77	2.08	0.76	-0.33	0.5	1.34	-0.56
GENE132X	51330	" TNFRSF12A -  Tumor necrosis factor receptor superfamily, member 12A"	1	0.17	0.38	-0.85	0.32	-0.04	2.21	2.99	-0.31	0.17	1.42	1.21	1.66	-0.9	-0.58	-0.47	1.31	-0.07	0.68	0.29	-0.86	0.86	-0.29	1.31	1.12	0.49	0.98	1.26		-0.11	0.78	0.22	0.61	1.36	1.49	-0.49
GENE788X	2117	 ETV3 -  ets variant 3	1	-0.07	0.1	-0.12	0.13	-0.04	0.79	0.7	0.06	0.41	1.98	0.75	0.26	-0.27	-0.28	0.5	-0.02	-0.17	-0.08	-0.04	-0.59	0.05	0.58	1.63	-0.33	0.75	0.95	0.73	0.71	-0.55	0.26	0.36	0.36	1.58	0.85	-0.23
GENE219X	5054	" SERPINE1 -  Serpin peptidase inhibitor, clade E (nexin, plasminogen activator inhibitor type 1), member 1"	1	-0.14	0.04	-0.08	0.3	-0.11	1.95	1.99	-0.4	0.06	1.57	0.95	1.26	0.28	-0.16	-0.06	0.15	0.25	0.31	-0.35	-0.2	0.11	0.44	1.8	-0.65	0.54	1.32	2.29	1.7	-0.66	0.75	0.39	0.79	1.44	1.43	1.04
GENE278X	84691	" FAM71F1 -  Family with sequence similarity 71, member F1"	1	0.23	0.35	-1.11	0.35	0.18	2.58	2.52	1.21	0.66	3.3	1.01	3.42	-0.65	-0.44	1.09	0.92	0.02	-0.6	-0.01	-0.99	0.89	0.12	1.79	0.79	1.83	1.55	2.53	1.85	0.12	1.31	0.75	1.56	2.44	-0.01	0.95
GENE1504X	64651	 CSRNP1 -  Cysteine-serine-rich nuclear protein 1	1	-0.09	-0.16	0.12	0	0.12	3.3	3.04	0.99	0.6	3.36	2.66	3.07	-1.1	-1.23	0.62	0.52	-0.22	-0.82	0.23	-1.01	0.69	0.09	1.39	0.23	1.56	1.43	1.81	1.44	0.23	1.64	1.36	2	2.81		1.79
GENE154X	57578	 KIAA1409 -  KIAA1409	1	-0.28	0.04	0.25	0.2	-0.19	1.64	0.93	0.62	-0.67	3.29	2.08		-1.9	-1.68	0.38	-1.11	-1.49	0.33	0.09	-0.27	-0.18	0.35	0.74	-0.68	1.48	-0.21	2.23	1.07	-0.48	0.5	-0.62		0.66	-1.07	1.73
GENE196X	6887	 TAL2 -  T-cell acute lymphocytic leukemia 2	1	-0.13	-0.32	0.32	0.49	-0.34	3.13	0.9	-0.57	-0.7	2.55	2.4	-0.14	-0.85	0.11	0.29	-0.42	0	-1.41	0.09	-0.08	-0.21	0.17	0.49	0.08	0.04	-0.1	0.55	0.36	-0.14	0.74	0.25	-0.05	-0.31	-0.42	-0.06
GENE1061X	22822	" PHLDA1 -  pleckstrin homology-like domain, family A, member 1"	1	-0.12	0.14	-0.07	0.16	-0.07	1.71	1.58	0.42	0.09	1.44	0.68	-0.72	-0.48	-0.24	0.39	-0.04	-0.18	-1.86	0.27	-0.57	-0.05	0.21	1.62	0.95	0.07	-0.09	0.55	0.25	-0.69	0.27	-0.51	0.34	0	-0.39	-0.69
GENE207X	2167	" FABP4 -  Fatty acid binding protein 4, adipocyte"	1	-0.27	-0.12	-0.28	0.22	0.47	2.89	1.99	0.43	-0.96	0.29	1.71	0.2	0.97	1.22	0.23	-0.36	0.14	-1.27	-0.41	0.5	-0.5	0.43	1.03	-1.02	-0.89	-0.85	-0.12	-1.17	0.22	-0.65	0.14	-1.19	-0.96	-0.64	0.12
GENE448X	51710	 ZNF44 -  Zinc finger protein 44	1	-0.26	-0.06	-0.05	0.11	0.27	0.65	2.08	-0.12	0.27	0.94	3.22	1.84	0.28	0.15	-0.86	-0.23	0.58	1.01	-0.28	0.76	-0.44	-0.05	0.98	-0.37	-0.84	0.41	1.23	-0.19	-0.39	-0.47	-0.82	-0.57	-0.53	0.28	1.69
GENE159X	2151	 F2RL2 -  Coagulation factor II (thrombin) receptor-like 2	1	0.07	-0.1	-0.07	0.05	0.04	0.88	1.64	-0.33	-0.17	-0.26	0.75	1.76	0.7	0.3	-0.13	-0.49	-0.25	1.9	0.54	0.28	-0.09	-0.73		-1.52	-0.18	-0.43	-0.68	-0.34	0.41	-0.3	0.03	0.13	-0.73	-0.56	-0.08
GENE160X	26271	 FBXO5 -  F-box protein 5	1	-0.16	-0.15	0.43	0.03	-0.16	0.83	0.59	-0.31	-0.25	-0.5	0.4	2.13	0.43	1.08	-0.04	-0.27	0.31	2.42	0.1	-0.08	-0.1	0.08	-0.1		-0.51	-0.34	-0.28	0.34		0.31	0.32	-0.03	-0.62	-0.69	-0.77
GENE1250X	375444	 C5orf34 -  chromosome 5 open reading frame 34	1	0.11	-0.45	0.21	-0.07	0.21	0.17	1.05	0.1	-0.74	-0.54	0.88	1.94	0.37	0.44	-0.86	-1.01	-0.26	2.08	0.22	-0.28	0.2	-0.02	-0.48	0.33	-1.01	-1.39	-0.9	0.3	0.12	-0.65	0.07	-0.51	-0.5	-1.47	0.57
GENE918X	6788	" STK3 -  Serine/threonine kinase 3 (STE20 homolog, yeast)"	1	-0.22	0.12	-0.16	0.14	0.2	1.62	1.38	0.23	-0.2	-0.25	0.63	1.75	0.71	0.57	0.32	-0.56	-0.1	0.83	-0.17	-0.98	0.6	0.22	-0.22	0.84	0.32	0.08	-0.36	0.63	0.26	0.52	1	-0.06	0.18	0.02	0.59
GENE247X	84307	 ZNF397 -  Zinc finger protein 397	1	-0.12	-0.14	-0.3	0.46	0.1	1.63	2.09	-0.15	-0.48	-0.2	1.93	2.79	1.54	0.84	-0.37	-0.7	-0.61	2.1	-0.62	0.5	0.19	-0.08	0.16	1.69	0.14	-0.47	-1.29	0.12	1.38	-0.51	-0.67	0.14	-0.69	0.09	0.77
GENE1435X	1104	 RCC1 -  Regulator of chromosome condensation 1	1	0	-0.12	-0.02	0.05	0.09	1.83	1.79	0.01	-0.28	-0.29	1.03	1.98	0.82	0.62	-0.08	-0.2	-0.21	0.89	0.18	0.08	0.03	-0.29	-0.96	-0.34	0.06	-0.25	-0.35	0.19	-0.43	-0.26	-0.36	-0.01	-0.38	-0.56	-0.04
GENE1776X	2744	 GLS -  Glutaminase	1	0.03	-0.08	0.14	-0.01	-0.08	1.75	1.8	-0.41	-0.11	-0.15	1.74	2.18	0.59	0.7	-0.02	0.3	0.02	0.49	0.4	-0.59	0.29	-0.17	-0.9	-0.32	0.09	-0.34	-0.53	0.21	0.69	0.36	0.12	0.03	0.1	-0.13	0.22
GENE1057X	3312	 HSPA8  -  heat shock 70kDa protein 8	1	0.2	-0.04	-0.31	0.06	0.08	2.06	1.29	-0.19	-0.35	0.26	2.77	3.62	1.83	1.17	-0.35	0.08	0.03	0.69	0.35	-0.89	0.63	-0.09	-0.1	-0.76	-0.36	-0.52	-0.31	0.19	-0.2	0.67	-0.02	0.16	-0.58	-0.14	1.11
GENE1586X	6715	" SRD5A1 -  Steroid-5-alpha-reductase, alpha polypeptide 1 (3-oxo-5 alpha-steroid delta 4-dehydrogenase alpha 1)"	1	0.06	-0.21	0.03	0.23	-0.11	1.19	1.3	-0.7	-0.62	-0.47	1.53	2.21	1.29	0.67	-0.28	-0.69	-0.04	2.16	0.39	-0.26	-0.02	-0.1	-0.87	-0.57	0.25	0.03	-0.23	-0.28	0.71	0.23	-0.06	0.17	-0.09	0.05	1.44
GENE164X	3320	" HSP90AA1 -  Heat shock protein 90kDa alpha (cytosolic), class A member 1"	1	-0.15	-0.16	0.12	0.18	0	1.85	1.65	0	-0.47	-0.54	2.54	3.67	2.02	1.53	-0.2	-0.18	-0.52	2.65	0.87	-1.46	0.55	0.05	-0.08		0.49	-0.5	-0.67	0.77	-0.17	0.95	0.88	0.4	0.34	-0.28	2.29
GENE1799X	3301	" DNAJA1 -  DnaJ (Hsp40) homolog, subfamily A, member 1"	1	-0.26	-0.03	-0.04	0.27	0.08	1.58	1.59	-0.01	-0.35	0.52	2.63	2.79	1.19	0.92	0.28	-0.2	0.45	2.38	0.4	-0.32	-0.05	-0.03	-0.72	0.16	0.24	0.28	0.25	0.76	0.11	1.49	1.32	-0.15	0.05	0.07	1.62
GENE1299X	3305	 HSPA1L -  heat shock 70kDa protein 1-like	1	-0.02	0.25	-0.48	0.67	-0.4	2.36	2.48	-1.07	-0.82	-0.27	4.71	5.13	3.15	1.92	-0.21	-0.77	-0.12	4.69	-0.31	-0.08	0.11	0.28	-0.14	0.52	0.61	1.08	0.39	1	0.36	1.89	1.88	0.73	0.47	0.61	4.18
GENE1857X	3303	 HSPA1A -  heat shock 70kDa protein 1A	1	-0.05	-0.25	-0.08	0.45	-0.08	3.57	3.49	-0.45	-0.95	0.37	5.93	5.91	3.54	2.44	-0.55	-0.38	-0.31	4.86	0.38	0.12	-0.08	-0.42	-0.31	-0.43	-0.09	-0.04	-0.47	-1.04	-0.51	0.75	0.57	-0.49	-0.17	-0.2	2.27
GENE1833X	10808	 HSPH1 -  Heat shock 105kDa/110kDa protein 1	1	-0.47	-0.33	0.07	0.3	0.43	3.29	2.72	-0.39	-0.3	0.13	4.08	4.96	2.68	1.66	-0.61	-1.1	-0.51	3.16	0.23	0.16	0.13	-0.52	0.28	0.61	-0.77	-0.46	-0.05	0.73	0.61	0.5	0.59	-1.33	-0.87	-0.73	2.54
GENE1376X	55466	" DNAJA4 -  DnaJ (Hsp40) homolog, subfamily A, member 4"	1	-0.27	0.08	-0.14	0.04	0.31	3.37	2.67	-0.25	-0.41	-0.47	5.12	4.5	2.92	2.29	-0.2	-0.23	-0.26	2.99	0.64	0.54	-0.39	-0.78	-0.81	1.27	0.46	-0.09	-0.32	1	1.71	0.26	1.07	0.63	-0.25	-0.11	2.08
GENE1712X	8577	 TMEFF1 -  transmembrane protein with EGF-like and two follistatin-like domains 1	1	0.14	0.18	-0.15	-0.16	-0.02	3.1	2.48	-0.1	-0.04	-0.64	2.73	3.78	1.72	1.12	-0.23	-0.5	-0.53	3.01	0.69	-0.16	0.2	-0.74	0.6	0.92	0.26	-0.36	-0.73	1.66	1.27	1.09	0.43	0.14	0.13	0.04	1.88
GENE163X	3337	" DNAJB1 -  DnaJ (Hsp40) homolog, subfamily B, member 1"	1	-0.29	-0.31	0.26	0.34	0.02	2.87	2.43	-0.18	-0.58	0.93	5.17		0.63	0.52	-0.13	-0.15	-0.27	3.67	-0.09	-0.28	0.43	-0.06	0.14	1.34	0.37	0.08	0.54	1.34	1.07	0.6	0.64	0.73	0.57	0.43	3.22
GENE1258X	26973	 CHORDC1 -  Cysteine and histidine-rich domain (CHORD)-containing 1	1	-0.39	-0.04	-0.58	1.31	-0.31	2.24	2.19	-0.29	-0.64	-1.29	3.11	4.46	1.8	1.06	-0.4	-0.62	-0.56	2.61	-0.08	-0.47	0.84	-0.52	1.15	1.57	0.37	0.89	-0.49	1.99	0.85	1.39	1.91	0.43	0.29	-0.03	3.08
GENE162X	147111	 NOTUM -  Notum pectinacetylesterase homolog (Drosophila)	1	-0.19	0	0.31	0.07	-0.17	1.31	1.2	0.22	-0.43	0.13	1.47	1.61	1.32	1.23	0.13	-0.43	-0.11	2.05	-0.08	-0.06	-0.16	0.3	0.65		-0.26	0.18	0.04	0.82	0.06	0.89	1.39	0.37	0.11	-0.51	0.56
GENE908X	26091	 HERC4 -  Hect domain and RLD 4	1	-0.37	-0.08	0.41	0.21	-0.15	2.03	1.69	-0.04	-0.96	-1.32	1.6	2.02	0.99	1.03	-0.15	-0.95	-0.75	1.64	0.43	-0.24	-0.23	0.05	0.78	-0.68	-0.42	-0.08	0.03	0.46	-0.15	0.9	1.16	0.05	-0.39	-0.7	-0.12
GENE161X	730961	 LOC730961 -  Hypothetical protein LOC730961	1	-0.71	-0.17	0.64	-0.03	0.27	1.89	1.33	0.21	0.08	0.23	1.57	1.45	1.13	1.7	0.39	-0.05	0.25	2.03	0.18	-0.47	-0.22	0.5	1.75		0.48	1.21	0.29	0.71	-0.14	0.48	0.04	0.15	0.55	0.26	-0.52
GENE1598X	54585	 LZTFL1 -  Leucine zipper transcription factor-like 1	1	-0.41		0.38	0.08	-0.05	1.96	1.57	-0.07	-0.55	-0.22	1.44	1.49	0.79	1.27	0.21	-0.4	0.38	1.72	0.33	-0.39	-0.14	0.21	1.01	1.05	0.38	0.33	-0.4	0.45	-0.15	-0.05	0.09	-0.27	0.12	-0.13	-0.62
GENE1635X	90488	 C12orf23 -  Chromosome 12 open reading frame 23	1	-0.1	0.03	-0.13	0.05	0.14	1.7	1.44	0.01	-0.34	-0.03	1.16	1.91	1.19	1.23	0.26	-0.34	0.39	1.93	0.39	-0.09	0.03	-0.13	0.98	1.22	0.28	0.37	-0.76	0.1	-0.25	-0.34	0.01	0.77	-0.06	-0.15	-0.57
GENE1673X	23362	 PSD3 -  Pleckstrin and Sec7 domain containing 3	1	-0.39	0.15	0.09	0.13	0.02	2.59	2.7	0.02	0.07	0.18	1.41	1.99	1.12	1.11	0.15	-0.33	0.37	1.58	-0.13	-0.22	0.09	0.27	0.39	0.56	0.27	0.12	-0.5	-0.63	-1.14	-0.92	-0.58	0.24	0.42	0.12	-0.29
GENE1120X	160418	 TMTC3 -  Transmembrane and tetratricopeptide repeat containing 3	1	-0.5	-0.16	0.34	0.16	0.18	0.98	1.97	-0.22	-0.49	-0.17	1.25	1.6	0.67	1.11	-0.09	-0.48	0.24	1.75	-0.08	-0.18	0.04	0.21	0.48	0.03	0.1	0.14	-0.33	0.04	-0.87	-0.04	-0.75	0.13	0.19	0.16	0.08
GENE701X	79888	 LPCAT1 -  Lysophosphatidylcholine acyltransferase 1	1	-0.33	-0.06	0.39	0.11	-0.13	1.69	0.73	-0.09	-0.53	0.54	1.32	1.85	0.72	1.11	0.03	-0.42	-0.1	1.78	-0.38	-0.3	-0.08	0.77	0.42	0.19	0.15	0.49	0.09	-0.06	-1.1	0.25	0.09	0.54	0.18	0.17	-0.26
GENE547X	871	" SERPINH1 -  serpin peptidase inhibitor, clade H (heat shock protein 47), member 1, (collagen binding protein 1)"	1	-0.02	0.09	-0.37	0.31	-0.02	0.84	1.4	0.21	-0.43	-0.93	3.22	3.02	1.75	1.56	0.16	-0.88	-0.66	2.81	-0.88	-0.31	0.52	0.68	0.93	0.38	0.32	0.17	-0.2	-0.47	-1.94	0.17	-0.38	0.5	0.4	-0.22	-0.06
GENE1538X	9474	 ATG5 -  ATG5 autophagy related 5 homolog (S. cerevisiae)	1	-0.14	-0.21	-0.34	0.45	0.23	0.66	1.56	-0.02	0.07	0.36	1.19	2	0.61	0.68	0.43	-0.06	0.4	1.68	-0.26	-0.09	0.05	0.29	1	0.63	0.08	0.23	-0.01	0.65	-0.31	-0.09	0.29	0.07	0.28	-0.1	0.52
GENE552X	4071	 TM4SF1 -  transmembrane 4 L six family member 1	1	-0.22	-0.24	-0.09	0.28	0.26	0.84	1.3	0.17	0.17	0.26	1.42	1.89	0.51	0.53	0.22	0.21	0.29	1.52	0.51	0.11	-0.64	0.02	1.68	0.46	-0.33	-0.34	-0.8	0.77	-0.34	-0.2	-0.48	-0.23	-0.25	-0.85	-0.23
GENE739X	29074	 MRPL18 -  Mitochondrial ribosomal protein L18	1	-0.41		0.06	0.2	0.16	0.83	1.13	-0.14	-0.44	-0.7	2.19	1.9	0.56	0.59	0.2	-0.6	-0.39	0.85	0.19	0.06	-0.33	0.09	-0.15	1.46	-0.02	-0.11	-0.16	-0.54	-1.15	0.01	-0.12	0.12	-0.47	-0.46	-0.32
GENE949X	51700	 CYB5R2 -  Cytochrome b5 reductase 2	1	-0.3	-0.4	-0.23	0.7	0.25	1.34	1.13	0.09	0.11	0.51	2.54	2.25	0.2	-0.01	-0.93	-0.2	-0.22	1.31	0.4	0.52	-0.31	-0.61	-0.91	-0.11	-0.03		-1.26	-1.02	-0.75	-0.63	0.36	-1.17	-0.78	-0.27	1.48
GENE1381X	4191	" MDH2 -  Malate dehydrogenase 2, NAD (mitochondrial)"	1	-0.15	0.08	-0.14	0.03	0.17	1.35	1.55	-0.31	0.31	0.6	1.54	0.64	-0.81	-0.23	-0.27	-0.53	-0.01	-0.89	-0.57	0.51	0.01	0.04	0.15	-0.24	-0.03	0.02	-0.55	-1.79	-1.77	-0.63	-1.11	-0.05	-0.39	-0.21	0.18
GENE1293X	118429	 ANTXR2 -  Transcribed locus	1	0.04	0.13	-0.26	0.13	-0.04	1.64	1.91	-0.02	-0.08	0.07	0.29	1.19	-0.14	-0.6	0.07	0.54	0.21	-1.32	-0.19	-0.35	0.27	0.28	0.21	-0.25	-0.8	-0.94	-0.75	-1.13	-1.19	0.06	-0.35	-0.3	-0.69	-0.25	0.06
GENE1484X	118429	 ANTXR2 -  Anthrax toxin receptor 2	1	0.04	0.13	-0.26	0.13	-0.04	1.64	1.91	-0.02	-0.08	0.07	0.29	1.19	-0.14	-0.6	0.07	0.54	0.21	-1.32	-0.19	-0.35	0.27	0.28	0.21	-0.25	-0.8	-0.94	-0.75	-1.13	-1.19	0.06	-0.35	-0.3	-0.69	-0.25	0.06
GENE165X	116211	 TM4SF19 -  transmembrane 4 L six family member 19	1	0.36	-0.13	-0.99	0.49	0.27	2.14	1.93	-0.22	0.12	0.08		1.43	0.85	0.67	-0.02	0.01	0.24	-0.93	-0.12	-0.34	0.08	0.39	0.73	0.93	-0.38	-0.75	-0.33	-0.15	-0.29	0.11	-0.19	0.78	-0.65	0.44	1.08
GENE296X	57035	 C1orf63 -  Chromosome 1 open reading frame 63	1	-0.11	-0.17	-0.05	0.28	0.06	2.96	2.06	-0.11	-0.19	0.19	2.07	1.19	1.67	1.13	-0.21	0.33	0.46	0.83	0.33	0.35	-0.18	-0.51	0.53	1.48	0.15	0.02	0.83	1.03	-0.73	0.92	0.73	-0.5	-0.5	-0.47	-1.86
GENE1332X	64968	 MRPS6 -  Mitochondrial ribosomal protein S6	1	0.07	-0.08	0.09	-0.06	-0.03	1.69	2.41	-0.21	-0.26	-0.03	1.03	1.01	0.76	0.82	-0.31	-0.15	0.01	0.92	0.27	-0.53	0.32	-0.06	0.95	-0.02	-0.38	-0.1	0.1	0.14	-1	0.83	0.17	-0.17	-0.3	-0.33	-0.33
GENE665X	3141	 HLCS -  Holocarboxylase synthetase (biotin-(proprionyl-Coenzyme A-carboxylase (ATP-hydrolysing)) ligase)	1	-0.22	0.18	-0.36	0.18	0.23	1.06	1.82	0.33	0.38	0.68	1.12	1.66	0.16	1.11	0.37	-0.27	0.4	-0.11	-0.26	0.46	-0.05	-0.14	0.85	0.27	-0.27	0.01	-0.24	0.24	-0.97	-0.48	-0.3	0	-0.16	-0.02	-0.74
GENE1645X	100216546	 LOC100216546 -  Hypothetical LOC100216546	1	-0.23	-0.1	0.45	0.07	-0.18	1.56	1.48	0.04	0.23	1.41	1.75	1.67	0.46	0.55	0.51	0.61	0.49	0.66	0.16	-0.41	0.05	0.22	0.68	0.2	-0.62	0.31	0.67	0.23	-0.31	0.26	0.76	-0.38	-0.43	0.46	-0.25
GENE1007X	29950	 SERTAD1 -  SERTA domain containing 1	1	-0.09	-0.01	-0.42	0.28	0.26	2.57	2.23	-0.54	-0.55	2.12	2.72	2.11	-0.23	-0.57	-0.62	0.21	0.16	-0.63	0.79	-0.59	-0.01	-0.18	-0.36	0.27	0.91	1.23	0.72	0.31	-0.3	-0.45	0.16	0	2.12	0.28	-0.45
GENE1648X	5606	 MAP2K3 -  Mitogen-activated protein kinase kinase 3	1	-0.14	-0.01	-0.16	0.16	0.15	2.3	1.84	0	0.11	1.29	2.01	2.05	-0.15	-0.1	-0.09	0.21	0.36	0.03	-0.09	-0.46	0.3	0.25	0.06	-0.68	0.48	1.18	1.41	0.47	-0.66	0.53	0.49	0.47	1.1	1.39	-0.12
GENE775X	10938	 EHD1 -  EH-domain containing 1	1	0.01	0.08	0	-0.13	0.04	2.37	1.95	-0.27	0.64	1.8	2.4	3.17	0.24	0.12	0.1	0.81	1.32	-1.03	-0.41	0.12	0.02	0.27	0.25	-0.16	0.29	0.7	0.61	-0.22	-0.34	1.38	-0.34	-0.27	0.42	1.04	-0.09
GENE1566X	51363	 CHST15 -  Carbohydrate (N-acetylgalactosamine 4-sulfate 6-O) sulfotransferase 15	1	-0.21	-0.19	0.45	-0.03	-0.01	3.1	2.93	-0.16	-0.47	-0.14	2.52	2.77	0.6	0.5	0.08	-0.61	-0.05	-1.56	-0.53	0.77	-0.05	-0.18	-0.04	-0.02	-0.24	0.53	0.26	-1.49	-1.5	0.56	-0.04	0.38	0.42	1.13	0.04
GENE1452X	5154	 PDGFA -  platelet-derived growth factor alpha polypeptide	1	-0.29	0.09	-0.33	0.17	0.34	3.39	3.47	0.07	-0.06	0.51	1.31	1.5	0.27	1.07	0.14	-0.65	-0.16	-1.1	-0.16	-0.58	0.08	0.67	0.38	-0.54	0.32	1.85	1.32	-0.52	-0.95	0.98	-0.06	0.34	1.52	1.48	-0.96
GENE1756X	2152	" F3 -  Coagulation factor III (thromboplastin, tissue factor)"	1	-0.32		0.25	0.16	-0.08	2.44	2.01	-0.14	-0.59	0.53	1.39	1.7	0.44	0.87	-0.32	-0.28	-0.11	0.03	0.26	-0.34	-0.24	0.32	-0.9	-1.25	0.52	0.31	0.22	-0.64	-0.44	0.13	0.31	0.28	0.39	-0.38	-0.93
GENE1842X	23529	 CLCF1 -  Cardiotrophin-like cytokine factor 1	1	0.12		0.12	-0.29	0.05	2.31	2.25	0.05	0.17	1.5	0.93	0.64	-0.19	-0.37	-0.17	0.34	0.44	-0.47	0	-0.29	-0.11	0.21	-0.02	-0.25	0.25	0.47	0.51	-0.41	0.06	0.18	0.2	-0.24	0.55	-0.32	-1.05
GENE1162X	10620	 ARID3B -  AT rich interactive domain 3B (BRIGHT-like)	1	-0.18	0.04	0.3	-0.16	-0.01	3.39	2.54	0.17	1.06	1.35	2.24	1.72	-0.6	-0.62	0.4	0.8	0.24	-0.47	0.09	0.18	-0.46	0.19	0.41	-0.24	0.16	0.34	0.72	-0.29	0.49	0.73	0.31	0.66	-0.02	-0.45	-0.85
GENE1825X	84159	 ARID5B -  AT rich interactive domain 5B (MRF1-like)	1	-0.25	0.19	0.02	0.06	-0.02	2.48	2.44	0.08	0.31	1.79	1.7	2.4	0.69	0.65	0.38	0.3	0.5	0.07	-0.29	-0.18	0.2	0.26	0.55	-0.18	0.22	0.09	0.55	0.68	0.12	0.29	1.63	0.2	0.21	-0.13	-0.07
GENE170X	1847	 DUSP5 -  Dual specificity phosphatase 5	1	0.12	0.67	-0.93		0.13	5.23	5.49	1.42	0.99	3.67	5.2	6.08	-0.32	0.44	0.76	0.39	0.59	0	-0.39		0.09	0.29		2.3	0.78	1.39	2.34	3.03	1.06	0.44	1.45	0.92	1.08	-0.02	0.88
GENE1031X	23237	 ARC -  Activity-regulated cytoskeleton-associated protein	1	0.21	-0.04	0.3	-0.14	-0.33	6.47	3.48	0.11	-0.24	5.99	5.78	5.39	-0.41	-0.22	0.65	-0.21	-0.41	0.16	-0.28		0.02	0.25	0.22	1.41	0.08	1.33	3.26	2	1.43	-1.35	-0.28	0.23	1.08	-0.13	-0.49
GENE901X	3164	" NR4A1 -  Nuclear receptor subfamily 4, group A, member 1"	1	0.35	0.23	-0.63	0.03	0.03	3.99	2.24	-0.12	0.06	3.53	2.17	4.56	-0.08	0.04	-0.14	0.09	-0.12	-0.37	0.26	-0.37	0.29	-0.17	0.28	-0.31	1.4	1.15	2.11	0.54	-0.19	-0.52	-0.3	1.53	1.35	0.14	0.77
GENE1859X	1844	 DUSP2 -  dual specificity phosphatase 2	1	-0.23	-0.24	0.07	0.17	0.23	3.47	3.19	-0.01	-0.13	3.42	2.13	3.64	0.29	0.49	-0.08	0	0.47	1.08	-0.19	-0.16	0.06	0.28	0.26	-0.47	1.01	0.64	1.59	0.76	0.51	0.05	0.32	0.92	0.96	-0.38	1.01
GENE895X	1958	 EGR1 -  early growth response 1	1	-0.34	0.06	0.28	0.06	-0.05	5.74	4.03	-0.22	-1.1	6.23	4.81	7.05	-0.98	0.12	-0.73	-0.6	-0.39	-1.53	0.26	-0.52	0.12	0.14	0.63	-1.41	0.75	-1.65	0.8	0.88	0.67	-0.6	0.11	0.96	-0.17	-2.62	-1.67
GENE877X	1908	 EDN3 -  Endothelin 3	1	0.06	0.17	0.35	-0.46	-0.1	2.59	1.56	-1.04	-0.8	2.77	2.48	4.6	-0.66	-0.33	-1.56	-0.86	-0.16	-0.78	0.41	-0.36	0.31	-0.37	-1.62	-1.14	1.26	-1.78	-0.02	0.43	1.69	-1	-1.49	0.4	-0.4	-2.04	-1.75
GENE1170X	8793	" TNFRSF10D -  Tumor necrosis factor receptor superfamily, member 10d, decoy with truncated death domain"	1	-0.08	-0.16	0.07	-0.01	0.17	3.15	3.84	0.12	0.19	0.72	2.97	2.74	-0.15	-0.31	-0.06	0.17	0.55	0.21	0.05	0	0.15	-0.2	-0.91	-0.17	0.29	-0.17	-0.31	0.52	1.95	-0.13	-0.49	0.2	-0.36	-0.13	-0.08
GENE1576X	1675	 CFD -  Complement factor D (adipsin)	1	0.02	-0.15	-0.04	0.13	0.04	0.74	1.7	-0.1	-0.28	0.34	1.81	2.08	0.4	0.39	-0.12	-0.27	-0.01	1.04	-0.3	-0.17	0.3	0.17	0.31	0.2	-0.16	-0.07	-0.04	-0.26	-0.08	0.24	0.19	0.25	0.44	-0.08	0.12
GENE1253X	29105	 C16orf80 -  Chromosome 16 open reading frame 80	1	-0.66	-0.01	0.34	0.18	0.14	1.08	1.36	0	-0.5	0.03	1.68	2.04	0.27	0.44	0.03	-0.47	0.26	0.54	-0.18	-0.24	-0.03	0.46	0.51	0.35	0.07	0.29	0.17	0.2	-0.52	-0.24	0.03	0.51	0.3	0.23	-0.07
GENE954X	7314	 UBB -  Ubiquitin B	1	-0.39		0.16	0.34	-0.1	1.52	1.28	-0.04	-0.24	0.11	1.65	1.83	-0.14	0.35	-0.16	-0.1	-0.36	0.54	-0.29	-0.25	0.31	0.22	-0.24	0.26	0.19	0.02	-0.04	-0.19	-1.22	-0.22	0.59	0.38	0.09	0.12	0.23
GENE1692X	386757	" SLC6A10P -  solute carrier family 6 (neurotransmitter transporter, creatine), member 10 (pseudogene)"	1	-0.57	0.02	0.25	0.06	0.24	2.37	1.86	0.25	0.1	0.82	1.74	1.2	0.14	-0.02	-0.19	-0.49	0.01	-0.39	0.45	-0.2	-0.6	0.34	0.03	0.12	-0.31	-0.31	-0.34	-0.77	-0.49	-1.22	-0.81	0.45	-0.81	-0.7	-0.49
GENE1584X	7301	 TYRO3 -  TYRO3 protein tyrosine kinase	1	0.06	0.06	0.35	-0.4	-0.08	1.66	2.36	-0.14	-0.07	0.11	2.05	3.36	0.24	0.34	-0.26	-0.51	0.42	-0.23	-0.29	0.14	0.14	0	-0.54	-0.12	-0.17	0	-0.21	-1.11	-1.48	-1.37	-1.18	-0.93	-0.22	0.04	-0.54
GENE1447X	2059	 EPS8 -  Epidermal growth factor receptor pathway substrate 8	1	-0.24	0.04	-0.1	-0.07	0.38	1.92	2.42	0.41	0.52	0.13	2.87	2.5	-0.35	-0.04	-0.28	-0.29	0.19	-0.36	0.54	-0.09	0	-0.45	-0.82	-0.22	-0.46	-0.95	-0.75	-0.75	-0.93	-1.14	-1.93	-0.37	-0.85	-0.47	-0.24
GENE171X	7064	 THOP1 -  Thimet oligopeptidase 1	1	-0.71	-0.29	0.39	0.19	0.43	2.03	1.9	0.29	0.15	0.08	1.7	1.41	0.15	-0.06	-0.96	-0.83	-0.42	-0.56	0.04	0.64	-0.51	-0.18	-0.41	-0.23	-0.98	-1.12	0.13	-0.61		-1.32	-0.41	-1.27	-0.82	-1.25	-0.5
GENE980X	10643	 IGF2BP3 -  insulin-like growth factor 2 mRNA binding protein 3	1	-0.38	-0.65	-0.42	0.73	0.72	3.37	2.88	0.39	0.63	0.46	2.92	2.4	-0.05	-0.24	-0.76	-0.38	-0.07	-0.87	-0.2	0.34	0.08	-0.21	0.4	1.14	-1.05	-0.74	0.2	0.65	-0.74	-0.83	-0.21	-1.61	-0.41	-1.09	-0.93
GENE1783X	3159	 HMGA1 -  High mobility group AT-hook 1	1	-0.49	-0.41	0.28	-0.08	0.7	2.71	2.66	0.59	0.17	1.12	1.73	1.92	-0.1	-0.3	-0.57	-0.55	0.12	-0.6	-0.38	-0.29	-0.15	0.82	0.87	0.37	-0.82	-0.61	0	-0.25	-0.84	0.21	-0.56	-0.5	-0.38	-0.7	-0.57
GENE971X	25907	 TMEM158 -  Transmembrane protein 158 (gene/pseudogene)	1	0.07	-0.48	0.09	0.02	0.32	4.15	4.5	0.43	0.33	0.85	3.63	2.33	-0.02	0.05	0.32	0.46	0.39	-1.82	0.19	0.46	-0.21	-0.45	2.51	1.46	-0.87	-0.15	0.38	-0.81	-2.03	-0.16	0.46	-0.08	-0.35	-0.14	-0.37
GENE489X	340252	 ZNF680 -  Zinc finger protein 680	1	-0.29	-0.04	-0.05	0.07	0.33	3.49	2.19	0.36	0.41	0.68	2.41	1.64	0.02	0.2	0.19	0.36		-1.51	0.3	0.15	-0.46	0.01	1.29	-0.1	-0.09	0.36	0.33	-0.67	-0.58	-0.51	-0.89	-0.33	-0.09	-0.29	-0.59
GENE1400X	7415	 VCP -  Valosin-containing protein	1	-0.42	-0.14	-0.18	0.52	0.2	2.04	1.76	0.34	0.09	0.34	1.3	1.25	-0.15	0.2	0.24	-0.04	0.14	-0.53	0.09	-0.25	0.05	0.1	1.17	0.83	0.22	0.56	0.31	0.38	-0.68	-0.37	-0.23	0.03	0.05	0.22	-0.76
GENE1571X	5880	" RAC2 -  Ras-related C3 botulinum toxin substrate 2 (rho family, small GTP binding protein Rac2)"	1	-0.53	0.14	-0.32	0.5	0.22	2.01	2.12	0.04	-0.22	0.14	0.78	0.83	-0.08	0.43	-0.31	-0.5	-0.2	-1.23	-0.17	-0.24	0.25	0.17	0.86	0.43	0.17	-0.37	-0.02	0.34	-0.82	-0.71	-0.8	-0.13	-0.31	0.02	-0.29
GENE1043X	57228	 SMAGP -  small cell adhesion glycoprotein	1	0.13	-0.11	0.46	-0.51	0.01	3.45	2.89	0.62	0.09	0.33	1.55	1.51	0.03	0.64	0.33	0.11	-0.01	0.17	-0.17	-0.57	0.25	0.48	0.74	0.68	0.16	-0.08	-0.07	-0.21	-0.7	0.79	-0.48	0.05	-0.03	-0.23	-0.75
GENE1395X	2968	" GTF2H4 -  General transcription factor IIH, polypeptide 4, 52kDa"	1	-0.29	-0.22	0.28	0.1	0.12	2.32	2.44	-0.21	-0.36	-0.13	1.61	1.48	0	0.28	-0.26	-0.35	-0.11	-0.58	0.33	-0.29	-0.19	0.14	0.56	-0.18	0.03	0.08	0.06	-0.07	-1.37	0.66	-0.03	0.12	-0.15	-0.31	-0.59
GENE1624X	389	" RHOC -  Ras homolog gene family, member C"	1	-0.38	-0.13	0.2	0.17	0.08	2.82	2.83	-0.32	-0.44	-0.12	2.04	1.77	-0.04	0.22	-0.24	-0.41	-0.12	-1.06	0.02	-0.17	-0.28	0.43	0.56	-0.09	-0.06	0.12	0.13	-0.49	-1.64	0.62	-0.17	0.01	-0.01	-0.22	-0.49
GENE1864X	4907	" NT5E -  5'-nucleotidase, ecto (CD73)"	1	0.42	0.2	-0.27	-0.19	-0.12	3.49	4	-0.1	-0.17	0.3	2.38	2.11	-0.57	-0.47	-0.85	-0.63	-0.1	-0.8	0.02	0.32	-0.1	-0.23	-0.2	-0.26	0.22	-0.06	-0.2	-0.72	-0.79	0.41	0.44	-0.41	-0.29	0.07	-0.16
GENE1870X	5055	" SERPINB2 -  serpin peptidase inhibitor, clade B (ovalbumin), member 2"	1	-0.18	0.19	0.26	-0.25	-0.01	3.88	3.69	0.21	0.29	1.06	2.4	2.6	-0.98	-0.96	0.28	0.26	-0.14	-0.89	0.45	-0.1	0.13	-0.49	-0.14	-0.16	0.04	-0.3	-0.39	0.4	0.2	0.16	0.15	0.13	-0.22	-0.67	-0.12
GENE1710X	2067	" ERCC1 -  Excision repair cross-complementing rodent repair deficiency, complementation group 1 (includes overlapping antisense sequence)"	1	-0.28	0.12	-0.24	0.21	0.21	3.67	3.45	0.1	0.07	0.13	2.43	2.43	-0.12	-0.15	-0.72	-0.42	-0.47	-1.03	0.41	-0.23	0	-0.18	1.52	1.78	0.2	-0.44	-0.06	0.86	-0.06	-0.43	-0.69	-0.64	-0.54	-0.63	-0.56
GENE1837X	6696	 SPP1 -  Secreted phosphoprotein 1	1	-0.1	-0.18	0.14	0.03	0.13	2.86	2.16	0.15	-0.03	0.22	1.95	1.94	0.55	0.14	-0.06	0.03	0.07	-0.02	0.54	-0.36	0.05	-0.23	0.58	1.18	-0.27	-0.25	0.01	1.12	-0.28	0.67	0.51	0.25	0.22	-0.61	0.25
GENE172X	51083	 GAL -  Galanin prepropeptide	1	0.14	0.07	0.01	-0.21	-0.01	6.58	5.96	0.3	-0.18	1.42	4.97	6.04	-0.29	-0.46	-0.29	0.03	-0.2	-0.56	1.17	-1.49	0.66	-0.33	2.36	1.7	0.27	-0.12	0.71	2.5		0.59	0.63	0.48	0.88	0.34	0.8
GENE1562X	28231	" SLCO4A1 -  Solute carrier organic anion transporter family, member 4A1"	1	0.56	-0.41	0.08	-0.33	0.11	4.95	4.29	-0.38	-0.16	0.21	2.88	3.37	0.65	0.79	-0.32	-0.44	-0.3	-0.04	-0.19	0.38	0.17	-0.36	1.5	0.67	0.22	0.54	0.58	1.48	0.23	1.15	0.72	0.48	0.38		
GENE1795X	8738	 CRADD -  CASP2 and RIPK1 domain containing adaptor with death domain	1	-0.11	-0.03	0.15	-0.35	0.16	4.45	3.93	-0.19	-0.37	0.05	3.17	3.82	0.05	0.39	0.18	-0.45	-0.37	-0.05	0.16	-0.01	0.09	-0.25	0.54	0.31	0.07	0.22	0.27	-0.16	-0.16	0	0.26	-0.13	-0.08	-0.41	-0.53
GENE1385X	6322	 SCML1 -  Sex comb on midleg-like 1 (Drosophila)	1	-0.16	0.03	0.22	-0.09	0.01	3.35	2.75	0.5	0.35	0.87	3.07	3.3	0.27	0.42	0.4	0.21	0.21	0.95	0.32	-0.8	-0.02	0.51	1.06	0.68	-0.01	0.11	0.08	0.84	0.03	0.86	1.07	0.2	0.25	-0.37	-0.49
GENE1098X	10979	 FERMT2 -  Fermitin family homolog 2 (Drosophila)	1	-0.14	0.19	-0.27	0.25	0.06	2.5	2.36	0.29	0.04	0.27	2.18	2.56	0.3	0.66	0.48	0.15	0.5	0.38	-0.17	-0.74	0.55	0.36	0.79	0.36	0.43	0.42	0.19	0.62	-0.41	0.06	-0.09	0.27	0.45	0.19	-0.12
GENE1604X	6611	 SMS  -  spermine synthase	1	-0.26	-0.29	0.2	0.18	0.16	1.9	2.03	0.21	0.35	0.31	1.79	1.49	0.79	0.98	0.24	0.38	0.58	0.68		-0.06	-0.17	0.23	0.32	-0.52	-0.25	0.26	-0.03	-0.1	-0.98	0.03	-0.56	0.27	0.34	-0.23	-0.32
GENE1171X	8853	" ASAP2 -  ArfGAP with SH3 domain, ankyrin repeat and PH domain 2"	1	0.2	0.03	0.12	-0.23	-0.12	2.41	3.61	-0.1	-0.1	0.25	2.08	2.32	0.66	1.04	-0.05	0.02	0.07	0.3	0.02	-0.44	0.06	0.37	-0.24	-0.64	-0.39	0.27	-0.09	-0.59	-1.62	-0.28	-0.5	0.21	-0.19	0.19	-0.63
GENE1658X	84668	" FAM126A -  Family with sequence similarity 126, member A"	1	-0.13	0.06	0.13	-0.15	0.1	2.02	2.25	-0.08	-0.03	-0.06	2.1	2.33	0.32	0.41	-0.13	-0.03	0.22	0.73	0.5	-0.17	0.13	-0.46	-0.5	-0.7	-0.3	-0.47	-0.4	-0.67	-1.19	-0.13	-0.13	-0.05	-0.23	-0.6	-0.28
GENE1736X	1977	 EIF4E -  Eukaryotic translation initiation factor 4E	1	-0.22	0.16	-0.11	0.16	0.13	1.86	1.77	0.04	0.1	0.23	1.31	1.35	-0.13	0.14	0.34	0.14	0.11	0.08	0.34	-0.3	-0.02	-0.01	-0.27	-0.64	0.08	0.15	0.11	0.07	-1.23	-0.27	-0.5	0.11	-0.04	0.09	-0.07
GENE1430X	23175	 LPIN1 -  Lipin 1	1	-0.11	-0.03	0.35	-0.04	-0.17	2.77	2.2	0.27	-0.05	0.44	2.71	2.29	-0.15	0.18	0.15	-0.15	-0.25	0.29	-0.07	-0.33	0.18	0.23	-0.28	-0.96	-0.18	-0.34	-0.89	-0.16	-1.27	-0.45	-1.17	0.2	-0.04	-1.31	-0.19
GENE1703X	10656	" KHDRBS3 -  KH domain containing, RNA binding, signal transduction associated 3"	1	-0.27		0.22	0.19	-0.13	3.11	2.38	0.16	-0.62	-0.06	3.29	3.07	0.07	0.56	0.45	0.09	0.12	1.13	0.03	-0.25	0.1	0.12	-0.09	-0.38	-0.06	0.22	-0.14	-0.08	-0.28	-0.35	-0.82	-0.47	0.32	-0.38	-0.47
GENE1631X	3632	" INPP5A -  Inositol polyphosphate-5-phosphatase, 40kDa"	1	-0.18	-0.14	0.2	0.01	0.1	2.78	2.98	0.07	-0.1	0.21	2	2.85	0.63	0.97	-0.02	0.06	0.01	0.69	-0.04	-0.19	0.17	0.06	-0.28	0.09	0.12	0.12	0.25	-0.38	-0.05	-0.73	-1.2	0.55	-0.16	0.1	-0.56
GENE1843X	7035	 TFPI -  Tissue factor pathway inhibitor (lipoprotein-associated coagulation inhibitor)	1	0.11	0.16	-0.33	-0.02	0.08	2.82	2.35	0.09	0.15	0.88	2.16	2.58	-0.09	-0.32	0.2	-0.04	0.15	0.72	-0.16	-0.16	0.12	0.2	-0.14	0.01	-0.04	-0.1	-0.17	-0.09	-0.5	-0.44	-0.27	-0.31	-0.12	-0.23	0.09
GENE1549X	1164	 CKS2 -  CDC28 protein kinase regulatory subunit 2	1	-0.18	-0.14	0.1	0.23	-0.01	3.63	3.01	-0.16	-0.53	2.19	3.71	3.37	0.72	0.66	-0.12	-0.61	-0.31	1.19	-0.08	-0.21	0.1	0.16	0.33	-0.45	0.11	0.07	0.53	0.6	-0.71	0.08	0.11	0.46	-0.03	-0.1	-0.78
GENE173X	10984	 KCNQ1OT1  -  KCNQ1 overlapping transcript 1 (non-protein coding)	1	-0.28		0.18	0.15	-0.04	2.07	1.76	0.13	-0.33	1.53	3.28	2.28	-0.09	0.1	0	-0.19	-0.07	0.51	0.44	-0.42	-0.24	0.22	0.48		-0.33	-0.04	0.16	-0.36		-0.56	-0.04	-0.74	-0.4	-0.55	-0.94
GENE649X	9134	 CCNE2 -  Cyclin E2	1	-0.2	-0.02	0.4	-0.05	-0.19	2.68	1.2	-0.12	-0.31	0.24	1.94	2.4	0.05	0.32	0.05	-0.18	0.22	1	-0.07	-0.42	0.15	0.34	-0.14	0.28	-0.14	0.07	-0.12	0.19	-0.02	0.13	0.49	0.46	0.07	-0.3	-0.05
GENE1428X	2260	 FGFR1 -  Fibroblast growth factor receptor 1	1	-0.02	0.09	-0.45	0.24	0.07	1.79	1.21	0.3	0.04	0.48	1.58	1.65	0.4	0.53	0.14	0.13	0.18	0.32	-0.44	-0.43	0.31	0.56	0	-0.58	0.22	0.2	-0.43	-0.18	-0.61	0.19	0.14	-0.03	0.25	-0.03	-0.06
GENE174X	53834	 FGFRL1 -  Fibroblast growth factor receptor-like 1	1	0.34	-0.04	-0.76	0.4	0.05	2.57	1.7	0.47	-0.09	0.52	1.09	1.76	0.16	0.28	0.35	0.26	0.07	0.46	-0.01	-0.72	0.44	0.29	0.16	0.06	-0.16	-0.02	-0.23	-0.32		-0.73	-0.22	0.07	0.24	-0.06	-0.41
GENE454X	6535	" SLC6A8 -  Solute carrier family 6 (neurotransmitter transporter, creatine), member 8"	1	-0.22	0.32	-0.32	0.12	0.11	2.74	2.75	0.45	0.14	0.28	1.97	2.1	-0.02	0	-0.29	-0.18	-0.19	0.29	-0.41	-1.07	0.69	0.8	0.99	0.83	0.43	-0.06	0.04	1.33	-0.14	-0.25	-0.94	0.44	0.5	-0.01	0.05
GENE1201X	27161	" EIF2C2 -  Eukaryotic translation initiation factor 2C, 2"	1	-0.18	0.08	0.2	0	-0.06	1.84	1.94	-0.03	-0.12	0.08	0.64	1.19	0.24	0.26	-0.04	0.23	-0.11	0.37	0.15	-0.31	-0.06	0.22	1	0.22	-0.17	0.17	0.25	0.91	0.2	0.05	-0.14	0.08	0.26	0.25	0.01
GENE1561X	23327	" NEDD4L -  Neural precursor cell expressed, developmentally down-regulated 4-like"	1	-0.12	0.31	0.48	-0.41	-0.27	2.38	1.82	-0.02	0.05	0.47	2.36	2.12	-0.11	-0.24	-0.04	-0.04	-0.17	-0.3	-0.05	-0.17	0.03	0.2	0.19	-0.07	0.07	0	0.14	0.84	0.15	0.47	0.48	0.76	0.38	0.5	0.5
GENE1829X	8871	 SYNJ2 -  Synaptojanin 2	1	-0.06	0.11	-0.17	0.2	-0.01	2.65	2.5	0.11	0.26	1.3	1.91	1.64	-0.45	-0.54	-0.12	0.73	0.73	-0.1	0.57	-0.61	0.09	-0.05	0.18	-0.1	0.16	0.75	0.58	-0.32	-0.43	-0.03	-0.8	-0.54	0.45	0.65	0.11
GENE1697X	9792	 SERTAD2 -  SERTA domain containing 2	1	0.12	-0.3	-0.36	0.42	0.33	3.51	2.93	0.02	0.37	2.29	2.92	2.77	0.06	0.07	-0.2	-0.01	-0.12	0.75	0.12	0.02	0.06	-0.19	-1.45	-1.13	0.15	0.47	-0.15	-1	-0.45	-0.23	-0.9	-1.58	0.26	0.37	0.23
GENE1345X	266727	 MDGA1 -  MAM domain containing glycosylphosphatidylinositol anchor 1	1	0.06	-0.22	0.24	-0.35	0.27	3.22	2.53	-0.44	0.03	0.11	1.4	1.1	0.19	0.11	-0.21	0.1	0.21	-0.59	0.48	-0.2	-0.06	-0.22	-0.94	-0.31	-0.23	-0.52	-0.82	-0.57	-1.52	0.02	0	-1.24	-1.03	-0.82	-0.83
GENE641X	23474	 ETHE1 -  Ethylmalonic encephalopathy 1	1	-0.07	-0.16	0.01	0.26	-0.03	2.27	3.03	-0.17	-0.27	-0.29	0.53	1.62	-0.03	0.13	-0.44	-0.1	-0.39	-0.69	0.15	-0.46	0.71	-0.4	-0.26	0.21		-0.53	-0.39	0.55	-0.29	1.14	0.36	0.44	0.34	-0.1	-0.19
GENE1824X	23130	 ATG2A -  ATG2 autophagy related 2 homolog A (S. cerevisiae)	1	-0.04	-0.26	0	0	0.28	2.29	2.19	-0.19	-0.23	0.23	1.27	2.05	0.17	-0.36	-0.16	-0.32	-0.2	-0.03	0.69	0.15	-0.1	-0.73	-0.14	0.45	0.19	-0.35	-0.24	0.79	0.66	0.42	0.28	-0.47	-0.56	0.06	0.01
GENE714X	1437	 CSF2 -  Colony stimulating factor 2 (granulocyte-macrophage)	1	0.25	-0.05	0.12	-0.23	-0.09	5.86	5.25	-0.12	-0.08	1.24	1.89	3.38	-0.36	-0.37	-0.06	-0.2	0.07	-0.67	0.36	0.13	-0.12	-0.33	0.17	-0.19	-0.18	-0.34	0.03	0.45	1.33	2.32	2.44	-0.12	-0.18	0.88	-0.37
GENE1804X	720	 C4A -  Complement component 4A (Rodgers blood group)	1	0.27	-0.07	-0.09	-0.08	-0.02	2.37	2	0.02	-0.11	0.87	0.8	0.94	0.05	-0.02	-0.32	-0.15	-0.01	-0.18	0.4	-0.17	0.33	-0.55	0.09	0.76	0.11	0.2	0.71	0.56	0.97	1.07	1.21	0.51	0.5	-0.04	0.38
GENE1704X	8848	" TSC22D1 -  TSC22 domain family, member 1"	1	-0.2	-0.08	0.06	0.21	-0.01	4.59	3.93	-0.1	-0.08	2.55	1.45	1.86	0.5	0.51	0.29	-0.3	0.46	0.48	0.06	-0.19	-0.01	0.18	1.33	1.45	0.14	0.51	1.65	1.18	1.27	0.53	0.83	0.4	0.48	0.34	0.23
GENE846X	3364	 HUS1 -  HUS1 checkpoint homolog (S. pombe)	1	-0.06	-0.57	0.28	0.29	0.05	2.9	1.71	-0.01	-0.03	0.26	1	1.43	0.39	0.8	0.17	0.17	-0.06	0.02	-0.14	-0.29	0.12	0.3	0.85	0.75	0.14	0.32	0.47	0.96	0.85	0.68	0.89	0.06	0.05	0.23	0.22
GENE1853X	728931	 LOC728931 -  Similar to hCG17429	1	-0.05		-0.01	-0.01	0.09	1.85	1.6	-0.28	-0.25	0.05	1.27	1.08	-0.08	0.19	-0.08	-0.19	0.05	-0.05	0.01	0.15	-0.03	-0.13	0.5	0.58	0.14	0.49	0.71	1.04	0.65	0.3	-0.01	-0.33	0.36	-0.06	0.24
GENE1082X	27040	 LAT -  Linker for activation of T cells	1	-0.29	-0.38	0.2	0.09	0.2	3.2	3.27	0.23	-0.12	0.23	1.73	2.45	0.1	0.24	-0.21	-0.05	0.15	0.21	-0.11	0.16	-0.51	0.46	0.43	0.4	0.15	0.46	0.68	0.35	2.09	0.53	0.73	1.24	0.47	-0.1	0.38
GENE1643X	9214	 IL24 -  Interleukin 24	1	-0.25	0.08	-0.33	0.18	0.33	2.71	2.88	-0.05	0.07	0.11	0.38	1.05	0.41	0.72	0.36	-0.04	0.57	0.1	-0.05	-0.05	-0.08	0.17	1.21	1.07	-0.01	-0.16	0.07	0.3	0.53	0.5	0.74	-0.25	-0.34	-0.38	-0.33
GENE1087X	22880	 MORC2 -  MORC family CW-type zinc finger 2	1	-0.28		0.22	0.23	-0.17	1.98	2.19	-0.29	-0.41	-0.2	1.5	1.06	0.01	0.34	-0.16	-0.55	-0.25	0.23	-0.2	0.47	-0.27		1.29	1.05	-0.04	0.03	0.13	0.3	-0.49	-0.07	0.5	-0.26	-0.38	-0.45	-0.62
GENE1570X	468	 ATF4 -  Activating transcription factor 4 (tax-responsive enhancer element B67)	1	-0.32	0.03	-0.36	0.26	0.28	1.92	2.09	0.06	0.15	0.59	1.42	1.16	-0.18	0.05	-0.06	-0.12	0.18	0.22	-0.21	0.52	0.13	-0.44	1.25	1.43	0.07	-0.23	0.09	0.79	0.05	-0.57	-0.02	0.22	-0.31	-0.28	-0.16
GENE1286X	4864	" NPC1 -  Niemann-Pick disease, type C1"	1	-0.48	-0.65	0.07	0.56	0.5	2.65	2.11	0.31	0.05	0.25	2.11	1.1	0.43	0.18	-0.88	-0.59	0.11	0.27	-0.98	0.97	0.34	-0.34	1.42	1.11	0.8	0.14	0.63	0.66	0.39	0.01	0.06	-0.83	-0.53	-0.33	0.84
GENE696X	57464	" FAM40B -  Family with sequence similarity 40, member B"	1	-0.52	-0.96	0.34	0.5	0.16	2.91	2.24	0.17	0.1	-0.1	2.66	1.94	0.28	0.48	-0.3	-0.82	0.12	0.13	0.09	0.09	0.16	-0.33	0.42	1.44	-0.46	-0.49	1.04	0.22	1.28	-0.11	0.42	-0.21	-0.48	-0.55	0.84
GENE685X	84275	" SLC25A33 -  Solute carrier family 25, member 33"	1	-0.41	-0.4	0.32	0.38	0.1	1.95	1.59	0.57	0.44	1.26	2.19	1.86	-0.35	0.03	-0.46	-0.63	-0.35	0.81	-0.14	0.67	-0.22	-0.31	0.41	1.5	-0.17	-0.5	1.29	0.61	0.46	-0.83	0.34	-0.58	-0.1	0	0.93
GENE1138X	4312	 MMP1 -  Matrix metallopeptidase 1 (interstitial collagenase)	1	-0.08	0.02	0.37	-0.31	-0.01	3.38	3.16	0.14	0.42	0.17	3.66	3.08	-1.63	-1.75	-0.08	-0.49	-0.76	-1.31	-0.09	0.87	-0.66	-0.12	1.37	0.59	-0.63	-0.11	0.01	-0.36	0.81	0.74	0.85	-0.9	-0.67	-0.7	0.73
GENE1826X	11217	 AKAP2 -  A kinase (PRKA) anchor protein 2	1	-0.1	0.19	-0.14	-0.02	0.08	1.85	1.39	0.09	0.12	0.1	1.87	2.52	-0.17	-0.07	-0.18	-0.17	-0.2	-0.86	0.13	-0.18	-0.25	0.3	0.46	0.1	-0.26	-0.29	0.32	0.46	0.88	0.96	0.65	-0.13	0.03	-0.14	0.67
GENE735X	7150	 TOP1 -  topoisomerase (DNA) I	1	0.08	0.02	-0.2	0.29	-0.19	2.33	2.31	0.32	-0.41	0.72	1.54	1.52	-0.5	-0.19	0.02	-0.5	-0.51	-0.19	0.22	-0.13	0.09	-0.18	1.76	-0.52	0.63	-0.21	0.53	1.28	0.03	-0.1	-0.21	-0.47	-0.67	-0.56	-0.89
GENE1601X	6809	 STX3 -  Syntaxin 3	1	-0.17	-0.1	0.09	0.21	-0.03	1.63	1.58	-0.34	-0.21	-0.05	1.04	1.72	0.31	0.8	-0.02	0.06	0.34	0.08	-0.44	-0.06	0.07	0.43	0.87	0.89	-0.03	0.21	-0.04	0.47	-0.02	0.25	-0.3	0.29	0.08	-0.53	0.28
GENE774X	5693	" PSMB5 -  Proteasome (prosome, macropain) subunit, beta type, 5"	1	-0.33	0.06	-0.5	0.64	0.11	0.9	1.81	0.3	-0.22	-0.32	0.52	1.2	0.06	0.53	0.06	-0.43	-0.15	0.27		-0.5	0.38	0.12	-0.57	0.1	0.24	-0.13	-0.22	-0.49	-2.07	-0.67	-1.28	-1.03	-0.22	-0.08	-0.48
GENE974X	4643	 MYO1E -  myosin IE	1	-0.22	-0.02	-0.4	0.41	0.22	1.83	2.45	0.4	0.11	0.22	1.06	1.35	1.08	0.81	-0.02	-0.15	0.18	0.53	-0.53	0.22	0.17	0.21	0.28	0.09	0	-0.02	0.42	0.27	-0.95	0.05	-0.37	-0.09	0.22	0.17	0.13
GENE916X	10910	" SUGT1 -  SGT1, suppressor of G2 allele of SKP1 (S. cerevisiae)"	1	-0.24	-0.08	-0.45	0.52	0.26	1.27	1.62	0.04	-0.06	-0.08	1.46	1.61	0.76	0.22	-1.08	-1.07	-0.87	0.84	0.05	0.55	-0.04	-0.56	-0.25	0.38	-0.47	-0.75	-1	-0.17	-1.17	-0.8	0.08	-1.29	-0.64	-0.85	-0.23
GENE870X	2804	 GOLGB1 -  Golgin B1	1	-0.32	-0.55	-0.35	0.65	0.55	1.25	1.75	0.5	0.63	0.51	1.67	1.76	0.91	0.28	-0.67	-0.09	0.03	1.05	0.09	0.09	0.2	-0.38	0.16	1.29	-0.7	-1.16	-1.03	-0.06	-0.63	-0.93	-0.18	-1.63	-0.77	-1.46	-0.5
GENE1493X	55625	" ZDHHC7 -  Zinc finger, DHHC-type containing 7"	1	-0.53	-0.07	0.04	0.42	0.14	2.2	2.36	0.12	0.04	-0.02	1.98	2.25	0.39	0.36	-0.64	-0.64	-0.09	1.14	-0.01	-0.41	0.8	-0.38	1.36	2.15	-0.16	-0.32	-0.99	0.76	-0.08	-0.48	-0.28	-1.63	-0.78	-0.1	-0.55
GENE1236X	8892	" EIF2B2 -  Eukaryotic translation initiation factor 2B, subunit 2 beta, 39kDa"	1	-0.4	-0.34	0.03	0.58	0.15	1.7	2.1	-0.19	-0.15	-0.33	1.15	2.12	0.13	0.65	0.24	-0.27	-0.15	1	0.41	-0.62	0.17	0.05	0.31	0.69	0.2	-0.16	-0.47	0.37	-0.68	-0.63	-0.31	-0.8	-0.46	-0.05	0.29
GENE168X	6935	 ZEB1 -  Zinc finger E-box binding homeobox 1	1	-0.37	0	0.29		0.08		3.11	0.24	-0.06	0.17	2.51	3.35	-0.06	0.37	0.77	0.26	-0.1	0.3	-0.02		-0.08	0.1		-0.66	-0.35	-0.38	-0.31	-0.07	0.18	-0.65	-1.65	-2.38	-0.5	-0.82	-0.72
GENE1750X	378938	 MALAT1 -  metastasis associated lung adenocarcinoma transcript 1 (non-protein coding)	1	-0.98	0.31	-0.01	0.65	0.18	1.78	1.5	-0.1	-0.32	0.59	1.78	2.14	-0.09	0.42	0.73	0.25	0.05	1.23	0.13	-0.14	0.06	-0.05	-0.28	-0.47	-0.38	-0.36	-0.57	-0.68	-1.53	-1.33	-1.27	-1.3	-0.84	-0.86	-0.87
GENE1734X	56904	 SH3GLB2 -  SH3-domain GRB2-like endophilin B2	1	-0.1	0.1	-0.48	0.7	-0.24	1.59	1.22	0.09	-0.18	0.39	1.19	1.62	-0.41	-0.28		0.13	-0.41	0.61	-0.39	0.01	0.09	0.3	0.06	0.31	0.31	-0.26	-0.56	-0.54	-1.01	-0.92	-0.87	-1.07	-0.54	0.02	-0.64
GENE844X	143686	 SESN3 -  sestrin 3	1	-0.07	-0.47	-0.04	0.12	0.46	1.43	1.23	0.22	0.43	0.8	1.15	1.59	0.08	0.27	-0.23	-0.02	0.06	-0.06	-0.44	0.22	0.32	-0.09	-0.45	0.03	-0.05	-0.46	-1.23	0.77	-1.17	-0.76	-0.79	-1.77	-0.87	-0.24	-0.55
GENE1728X	8653	" DDX3Y -  DEAD (Asp-Glu-Ala-Asp) box polypeptide 3, Y-linked"	1	0	0.04	-0.03	-0.12	0.11	1.72	1.17	-0.12	0.23	0.66	1.33	1.74	0.35	-0.06	0.17	0.17	0.84	0.01	-0.34		0.06	0.2	0.03	-0.47	-0.24	-0.42	-0.09	-0.37	-0.56	-0.11	0.19	-0.1	-0.24	-0.13	0.19
GENE354X	9143	 SYNGR3 -  Synaptogyrin 3	1	-0.19	-0.54	0.39	0.08	0.27	2.89	2.66	-0.08	0.52	0.88	2.29	2.93	0.33	0.2	-0.44	0.22	0.51	0.1	-0.58	0.98	0.05	-0.44	-0.35	-1.43	-0.56	-0.25	0.61	-1.54	-1.86	-0.54	0.56	-0.83	-0.85	-0.09	0.22
GENE427X	11072	 DUSP14 -  Dual specificity phosphatase 14	1	0.37	-0.53	-0.44	0.2	0.4	2.02	3.08	-0.11	0.13	0.81	1.85	2.37	0.12	0.61	-0.38	0.77	0.94	0.03	0.2	-0.32	-0.01	0.14	0.08	0.09	-0.76	-0.09	0.34	0.05	-0.76	-0.28	-1.59	0.17	-0.25	0.73	-1.52
GENE927X	10213	" PSMD14 -  Proteasome (prosome, macropain) 26S subunit, non-ATPase, 14"	1	0.03	-0.07	-0.06	0.17	-0.05	1.02	1.61	-0.28	0.14	-0.17	0.66	1.75	-0.27	-0.22	-0.05	0	-0.11	-0.35	0.01	-0.13	0.18	-0.06	0.32	-0.15	0.16	0.23	-0.02	0.62	-0.6	-0.14	-0.51	0.4	0.05	0.24	-0.06
GENE194X	4942	 OAT -  Ornithine aminotransferase	1	0.19	0.04	-0.31	0.17	-0.09	2.34	1.82	0.11	0.14	0.45	1.88	1.63	0.36	0.78	0.38	0.16	0.4	0.19	-0.86	-0.42	0.69	0.59	1.29	0.03	0.41	0.46	0.44	0.55	-0.91	0.6	-0.37	0.91	0.7	0.09	0.22
GENE517X	90853	 SPOCD1 -  SPOC domain containing 1	1	-0.26	0.06	0.08	0.01	0.11	2.56	1.66	-0.03	-0.09	1.05	0.97	0.72	0.89	1.18	-0.05	-0.02	0.88	-0.26	-0.01	-0.66		0.67	1.27	0.26	0.45	0.52	0.28	-0.02	-0.87	0.43	-0.46	-0.18	0.33	0.08	-0.18
GENE1691X	1026	" CDKN1A -  Cyclin-dependent kinase inhibitor 1A (p21, Cip1)"	1	-0.1	-0.08	-0.01	0.19	-0.01	1.96	2.02	0.05	-0.35	1.04	0.63	0.55	0.3	0.15	0.17	-0.35	-0.26	-0.4	-0.06	-0.82	0.17	0.71	0.37	0.15	0.23	-0.12	0.08	-0.66	-0.55	-0.45	-0.97	0.36	0.24	-0.19	-0.29
GENE1191X	967	 CD63 -  CD63 molecule	1	-0.68	0.07	0.25	0.11	0.24	1.72	1.44	0.04	0.1	0.68	0.7	1.74	0.36	0.77	0.03	-0.25	0.21	0.18	-0.19	-0.02	0.04	0.17	0.25	0.27	0.01	0.53	-0.34	-0.14	0.17	-0.95	-0.69	-0.09	0.79	-0.71	-0.22
GENE1434X	124402	" FAM100A -  Family with sequence similarity 100, member A"	1	-0.4	-0.02	-0.36	0.45	0.31	2.18	2.22	0.01	-0.26		1.14	2.03	0.41	0.81	-0.05	-0.28	0.35	0.79	-0.08	-0.5	0.25	0.34	1.5	0.95		1.07	0.94	1.1	0.04	-0.2	0.33	-0.85	1.02	0.33	0.29
GENE432X	6804	 STX1A -  syntaxin 1A (brain)	1	0.76	0.48	-0.7	-0.31	-0.23	2.24	2.43	-0.03	-0.06	0.65	0.34	2.26	-0.06	0.17	-0.03	-0.31	-0.16	0.22	-0.84	-0.05	0.24	0.65	1.74	0.98	0.15	0.73	0.79	1.05	0.15	-0.04	-0.53	0.25	0.61	0.12	-0.29
GENE674X	8061	 FOSL1 -  FOS-like antigen 1	1	-0.03	-0.11	-0.14	0.43	-0.14	1.05	1.88	0.16	0.22	1.12	1.88	1.6	-0.43	-0.11	0.41	-0.3	-0.08	-0.5	0.01	-0.38	0.09	0.28	-0.13	0.36	0.33	0.47	-0.02	0.32	1.05	0.23	-0.51	-0.05	0.35	-0.27	-0.58
GENE1854X	23099	 ZBTB43 -  zinc finger and BTB domain containing 43	1	0.12	-0.2	0.24	0.23	-0.41	1.8	1.63	0.33	-0.14	1.57	2.06	1.71	-0.76	-0.86	0.17	-0.13	0.13	0.89	0.02	-0.03	0.01	-0.01	0.91	0.63	0.16	0.08	0.87	0.66	0.23	0.42	0.33	0.06	-0.11	-0.42	0.43
GENE1612X	55148	 UBR7 -  ubiquitin protein ligase E3 component n-recognin 7 (putative)	1	0.01	-0.07	-0.62	0.38	0.3	1.62	1.65	0.15	0.4	0.37	1.34	1.83	0	-0.19	-0.17	0.35	0.52	0.93	-0.88	0.45	0.23	0.19	0.9	0.85	0.34	0.03	0.05	0.52	0.08	-0.41	-0.18	-0.2	-0.16	0.15	0.57
GENE570X	124637	 CYB5D1 -  Cytochrome b5 domain containing 1	1	-0.11	-0.23	-0.32	0.51	0.15	4.21	2.3	0.2	0.11	5.58	2	2.42	0.4	0.71	0.41	0.12	0.33	0.11	-0.2		-0.26	0.47	0.28	-0.11	0.1	0.15	0.71	-0.16	-0.53	-0.97	-0.96	-1.24	0.59	-0.52	-1.28
GENE1810X	5996	 RGS1 -  Regulator of G-protein signaling 1	1	0.08	-0.06	-0.47	0.62	-0.17	1.94	1.4	0.07	-0.6	1.81	0.65	1.54	-0.59	-0.2	-0.22	-0.15	-1.12	-0.17	0.28	-0.58	0.07	0.23	-0.44	-0.52	0.28	-0.6	-0.6	-0.31	-0.07	0.09	0.06	-0.18	-0.26	-0.58	-0.54
GENE1313X	3937	 LCP2 -  Lymphocyte cytosolic protein 2 (SH2 domain containing leukocyte protein of 76kDa)	1	-0.02	-0.14	-0.18	0.07	0.23	2.14	1.3	0.48	0.29	1.25	1.47	2.37	0.25	-0.15	-0.22	0.41	-0.12	0.33	-0.18	1.14	-0.55	-0.42	-0.33	0.09	-0.22	-0.05	0.54	-0.19	0.42	0.26	0.94	0.12	-0.18	0.22	0.02
GENE1156X	221692	 PHACTR1 -  Phosphatase and actin regulator 1	1	-0.13	-0.34	-0.25	0.52	0.2	1.88	1.65	0.08	0.45	1.01	1.49	1.84	0.01	-0.73	-0.58	-0.4	-0.22	-0.58	0.2	0.49	-0.35	-0.35	-0.76	-0.73	-0.11	-0.54	-1.42	-0.73	0.2	-0.8	-0.45	-0.01	-1.21	-0.24	-1.2
GENE167X	390940	 LOC390940 -  Similar to R28379_1	1	0.04	-0.03	0.36	-0.28	-0.11	1.91	3.27	0.35	-0.2	0.08		0.33	-0.34	0.01	0.39	-0.36	-0.22	-0.27	-0.25	-0.6	0.47	0.38	0.2		-0.04	-0.16	-0.43	0.3	-0.68	0.07	-0.48	0.22	0.12	-0.43	0.28
GENE457X	6405	" SEMA3F -  Sema domain, immunoglobulin domain (Ig), short basic domain, secreted, (semaphorin) 3F"	1	0.04	-0.47	0.48	-0.07	0.02	2.17	1.54	0.83	-0.31	0.1	1.22	1.61	0.12	-0.17	-0.51	-0.57	-0.56	-0.55	-0.69	0.43	-0.24	0.49	-0.8	-0.23	-0.22	-0.91	0.61	-1.35	0.27	-0.73	0.12	-0.68	-0.23	-0.28	-0.28
GENE1027X	84981	 C17orf91 -  chromosome 17 open reading frame 91	1	-0.07	0	-0.28	0.15	0.22	1.68	2.43	0.47	0.37	1.68	3.24	2.21	-0.84	-1.25	0.23	0.23	0.48	-1.68	0.7	-0.15	0.41	-0.95	0.18	0.33	0.55	-0.28	0.19	0.68	-0.41	0.45	-0.35		0.71	0.52	0.01
GENE378X	5252	 PHF1 -  PHD finger protein 1	1	0.04	0.04	-0.06	-0.11	0.11	2.13	1.56	0.46	0.3	0.56	0.73	2.76	0.64	-0.28	-0.16	0.33	0.04	-0.44	-0.46	-0.46	0.41	0.52	0.15	0.37	-0.01	-0.47	-0.89	-0.49	0.68	-0.52	-1.76	-0.15	-0.67	-0.17	-0.26
GENE166X	5829	 PXN -  Paxillin	1	0.13	-0.08	-0.2	0.05	0.11	1.03	1.84	0.13	-0.1	-0.15	0.82	0.46	-0.14	-0.31	-0.13	-0.02	0.07	-0.75	0.43		0.07	-0.51		-0.53	0	-0.2	-0.33	-0.88	-0.52	-0.2	-1.97	-0.84	-0.76	-0.36	-0.77
GENE821X	9700	 ESPL1 -  Extra spindle pole bodies homolog 1 (S. cerevisiae)	1	-0.26	-0.03	-0.09	0.19	0.05	3.13	2.62	0.25	-0.17	0.38	-0.06	0.23	0.28	-0.05	-0.2	0.02	0.25	-0.99	0.51	-0.38	0.09	-0.22	-1.36	-1.1	-0.16	-0.72	-1.27	-1.13	-0.12	-0.02	-0.88	-0.01	-0.48	-0.58	-1.63
GENE1467X	9755	 TBKBP1 -  TBK1 binding protein 1	1	-0.47	-0.1	0.29	0.16	0.13	2.1	1.66	-0.02	-0.11	0.66	0.49	-0.03	-0.32	0.18	-0.26	-0.27	0.16	-0.72	-0.07	0.01	-0.23	0.29	-0.18	-0.24	0.06	0.34	-0.3	-0.82	0.47	-0.51	-0.25	-0.37	-0.57	-0.16	-0.47
GENE509X	3554	" IL1R1 -  interleukin 1 receptor, type I"	1	-0.1	0.05	-0.1	0.17	0.01	2.77	2.04	0.37	-0.33	-0.06	1.27	1.47	0.04	-0.56	-0.18	0.17	-0.35	0.49	0.32	-0.51	0.29	-0.1	-0.63	-1.82	0.17	0.09	0.28	0.03	-0.84	0.33	0.44	-0.21	0.32	0.2	0.82
GENE1202X	10769	 PLK2 -  Polo-like kinase 2 (Drosophila)	1	-0.11	-0.08	0.06	0.13	-0.02	1.53	1.25	0.28	-0.18	1.28	3.17	1.43	-0.36	-0.07	-0.09	-0.21	0.03	-0.2	-0.1	0.19	-0.19	0.09	-2.42	-1.92	0.8	-0.47	1.23	-1.45	-0.71	0.75	-0.41	0.74	-0.17	1.68	-0.61
GENE1811X	2354	 FOSB -  FBJ murine osteosarcoma viral oncogene homolog B	1	-0.1	0.23	-0.04	-0.04	-0.05	1.51	1.5	0.56	0.47	2.48	1.96	1.49	-0.34	-0.18	0.17	0.47	0.09	-0.14	0.01	-0.61	0.16	0.45	-1.6	-1.83	1.25	0.93	0.88	-1.49	-1.14	-0.5	-0.12	0.17	0.7	0.44	-0.99
GENE1591X	154	" ADRB2 -  Adrenergic, beta-2-, receptor, surface"	1	-0.13	-0.02	-0.18	0	0.33	2	2.72	-0.04	0.2	2.05	1.73	1.64	0.27	0.43	0.2	0.28	0.03	0.21	0	-0.16	0.12	0.03	-1.68	-0.89	0.49	0.34	0.04	-0.69	-1.39	0.41	-0.58	0.31	0.12	-0.82	-0.21
GENE706X	9021	 SOCS3 -  Suppressor of cytokine signaling 3	1	-0.36	-0.23	0.16	0.34	0.1	2.11	0.98	0.03	-0.18	2.37	2.33	2.09	-0.15	-0.44	-0.32	-0.42	-0.17	1.22	0.23	-0.24	0	0.01	-0.75	-2.16	0.13	-0.07	-0.22	-1.77	-2.43	0.2	-0.3	-0.24	0.27	-1	0.4
GENE1855X	29789	 OLA1 -  Obg-like ATPase 1	1	-0.36	0.06	-0.04	0.26	0.07	1.67	1.08	0.11	-0.1	1.29	1.53	1.64	0.01	-0.33	-0.43	-0.39	-0.32	0.62	-0.05	-0.09	-0.2	0.35	-0.26	-1.12	0.17	-0.05	-0.54	-1.33	-1.28	-0.27	-0.73	-0.15	-0.12	-0.89	0.22
GENE1263X	4616	" GADD45B -  Growth arrest and DNA-damage-inducible, beta"	1	-0.21	-0.03	-0.33	0.34	0.23	2.77	1.55	-0.71	0.98	3.32	4.32	3.53	0.08	-0.75	0.34	0.81	0.64	2.3	-0.17	0.02	0.11	0.03	-3.39	-2.19	1.07	0.52	-1.2	-1.46	-1.99	-1.56	-2.68	0.69	0.95	-1.66	0.01
GENE622X	7538	" ZFP36 -  Zinc finger protein 36, C3H type, homolog (mouse)"	1	0.16	0.18	-0.61	0.06	0.21	2.5	1.23	0.66	0.77	3.49	2.68	3.89	0.41	-0.04	0.28	0.91	0.31	1.23	-0.09	-0.52	0.07	0.41	-1.63	-1.76	0.76	-1.19	-0.8	-1.7	-0.82	0.02	-0.65	0.62	-0.61	0.07	-0.69
GENE355X	29116	 MYLIP -  Myosin regulatory light chain interacting protein	1	0.54	-0.21	-0.43	-0.2	0.31	2.47	2.32	0.62	0.58	2.24	4.06	2.83	-0.46	-1.35	0.46	1.02	0.84	0	0.78	0.19	0.09	-1.06	-3.46	-1.64	0.26	-1.42	-0.16	-1.31	-0.41	-1.23	-0.62	-0.13	-1.19	-1.08	-0.84
GENE1039X	3149	 HMGB3 -  High-mobility group box 3	1		-0.09	0.18	-0.21	0.11	1.31	1.88	0.03	0.16	0.12	1.15	2.11	-0.2	0.07	0.11	0.07	0.22	0.26	0.31	0.29	-0.22	-0.38	-1.96	-1.22	0.04	0	-0.41	-0.8	0.31	-0.63	-1.22	0.47	-0.6	-0.44	-0.94
GENE1480X	51514	 DTL -  denticleless homolog (Drosophila)	1	-0.01	-0.02	0.61	-0.39	-0.18	1.54	0.96	-0.12	-0.19	0.46	1.21	1.05	-0.06	0.22	-0.47	-0.43	0.18	-0.1	-0.1	0.12	-0.21	0.14	-1.99	-1.66	0.26	-0.46	-0.48	-1.22	-0.21	-0.39	-0.22	0.15	-0.22	-0.62	-0.53
GENE762X	22800	 RRAS2 -  Related RAS viral (r-ras) oncogene homolog 2	1	-0.42	-0.22	0.93	-0.37	0.09	0.65	1.3	0.12	0.47	0.55	1.88	3.19	-0.12	0.69	-0.16	-0.17	0.14	0.49	-0.35	0.42	-0.09	0.01	-0.41	-0.66	-0.19	0.49	0.22	-0.71	-0.83	-0.42	-0.66	-0.1	0.36	0.29	-0.25
GENE1283X	8744	" TNFSF9 -  tumor necrosis factor (ligand) superfamily, member 9"	1	-0.42	0	0.34	0.11	-0.05	0.99	2.02	0.43	-0.49	1.85	2.21	1.47	-0.72	-0.7	0.1	-0.87	-0.41	0.02	0.19	-0.03	-0.31	0.16	-0.75	0	0.34	0.16	1.43	-0.14	-0.65	-0.17	0.08	0.47	-0.03	0	-1.23
GENE992X	3053	" SERPIND1 -  Serpin peptidase inhibitor, clade D (heparin cofactor), member 1"	1	-0.36	-0.53	0.68	-0.27	0.5	2.3	2.09	-0.19	0.13	0.27	2.64	2.62	1.21	0.39	1.2	0.85	0.09	0.25	-0.77	0.58	-0.63	0.83	0.97	0.31	0.46	1.1	0.63	0.5	0.82	0.44	0.87	1.17	0.73	1.04	-0.6
GENE700X	399	" RHOH -  ras homolog gene family, member H"	1	-0.22	0.09	0.71	-0.14	-0.44	1.97	1.94	-0.12	0.44	-0.1	1.77	1.32	0.62	0.22	-0.2	-0.4	-0.29	-0.78	0.13	-0.81	-0.11	0.78	-0.09	0.37	0.85	0.34	0.14	0.47	-0.6	0.6	1.25	0.91	-0.14	1.27	0.73
GENE545X	4321	 MMP12 -  Matrix metallopeptidase 12 (macrophage elastase)	1	-0.29	-0.24	0.72	0.21	-0.4	0.79	2.03	0.53	-0.43	0.36	0.57	1.44	0.18	0.62	-0.22	-0.75	-0.34	-0.24	-0.46	-0.03	0.2	0.3	0.81	0.4	0.34	0.13	0	0.72	-0.58	0.11	2.01	-0.75	-0.03	0.26	-0.04
GENE1374X	9542	 NRG2 -  neuregulin 2	1	0	0.46	-1	0.39	0.14	1.82	2.23	0.39	-0.09	-0.01	0.97	1.18	0.76	1.2	0.46	-0.19	0.64	0.86	-0.7	-0.85	0.83	0.71	1.81	0.81	0.22	0.37	0.93	0.85	-0.27	1.4	2.17	0.71	0.58	-0.16	0.31
GENE1053X	10447	" FAM3C -  Family with sequence similarity 3, member C"	1	-0.15	-0.11	0.28	0.01	-0.04	1.15	1.43	-0.02	0.19	0.01	0.35	1.66	0.77	0.76	0.28	0.13	-0.01	1.01	0.18	-0.64	-0.17	0.62	1.68	1.04	0.2	0.54	-0.04	1.26	0.54	1.31	1.09	0.67	0.72	-0.02	0.34
GENE640X	283635	" FAM177A1 -  Family with sequence similarity 177, member A1"	1	-0.26	-0.07	0.06	0.25	0.02	0.98	1.69	0.13	-0.45	-0.13	0.6	1.46	0.53	0.87	0.09	-0.46	0.11	0.91	-0.06	-0.73	0.38	0.4	1.31	1.12	0.28	0.31	0.02	0.57	-0.19	1.67	1.5	-0.17	0.72	0.1	0.4
GENE1256X	65264	 UBE2Z -  Ubiquitin-conjugating enzyme E2Z	1	-0.26	0.03	0.12	0.08	0.03	0.88	0.9	0.08	-0.12	-0.29	0.47	1.27	0.49	0.25	-0.12	-0.05	0.1	0.82	-0.1	-0.13	-0.12	0.35	0.83	1.08	-0.05	0.02	0.12	0.93	-0.11	1.72	1.6	-0.26	-0.23	-0.06	0.67
GENE804X	25862	 USP49 -  ubiquitin specific peptidase 49	1	-0.09	0.02	-0.79	0.58	0.3	1.44	1.48	-0.03	-0.1	-0.34	1.26	2.28	1.27	1.21	0.58	-0.38	0.15	2	0.02	-0.16	-0.1	0.23	0.56	0.06	-0.08	0.05	0.62	0.22	0.11	1.63	2.4	-0.35	0.17	1	0.91
GENE904X	115123	 MARCH3 -  Membrane-associated ring finger (C3HC4) 3	1	-0.15	-0.2	0.72	0.02	-0.41	0.81	0.74	0	-0.25	0.12	1.75	1.5	0.01	0.07	-0.15	0.03	-0.01	0.45	0.09	-0.13	-0.41	0.46	0.41	-0.05	-0.19	0.45	0.95	1.05	-0.32	1.74	3.17	0.55	0.16	0.46	1.19
GENE156X	220906	 LOC220906 -  Hypothetical protein LOC220906	1	0.04	-0.25	-0.18	-0.03	0.42	2.82	3.01	0.32	-0.2	-0.49	2.47	2.55	-0.28	-0.44	0.43	0.79		0.22	0.47	0.23	-0.23	-0.47	-0.85	0.37	0.52	-0.62	-0.23	0.62		3.63	3.37	0.17	-0.26	-0.2	0.46
GENE157X	5970	 RELA -  V-rel reticuloendotheliosis viral oncogene homolog A (avian)	1	-0.23	-0.15	0.18	-0.01	0.22	0.51	0.53	0.54	-0.09	0.03	0.47	0.86	0.16	-0.21	-0.31	0.03	0	-0.2	0.12	-0.42	0.12	0.19	0.35	0.1	-0.09	-0.39	-0.13	0.32		1.69	1.91	-0.05	0.17	-0.2	0.09
GENE1741X	91351	 DDX60L -  DEAD (Asp-Glu-Ala-Asp) box polypeptide 60-like	1	-0.14	0.15	-0.62	0.38	0.22	2.02	2.54	0.26	-0.07	-0.36	0.77	1.38	0.17	0.09	0.24	0	-0.23	-0.93	-0.32	-0.65	0.42	0.55	0.29	0.5	0.48	0.2	-0.07	-0.44	-0.48	4.25	4.22	0.53	0.46	0.07	1.41
GENE579X	24145	 PANX1 -  Pannexin 1	1	-0.16		0.05	0.04	0.08	1.94	2.81	0.28	-0.09	-0.4	1.79	1.98	0.5	0.5	0.22	-0.25	-0.06	1.31	0.34	-0.53	-0.08	0.27	0.85	-0.43	0.68	0.72	0.9	0.58	-0.83	2.86	3.07	0.62	0.87	0.46	0.87
GENE1357X	51251	" NT5C3 -  5'-nucleotidase, cytosolic III"	1	-0.41	-0.06	0.25	0.1	0.11	0.44	1.25	0.06	0.01	0.14	1.02	1.42	-0.1	-0.01	0.05	-0.12	0.13	1	-0.36	0.24	-0.08	0.2	0.59	-0.04	0.22	0.4	0.27	-0.41	-0.62	1.74	2.61	0.32	0.04	0.26	0.44
GENE1384X	9628	 RGS6 -  Regulator of G-protein signaling 6	1	-0.24	-0.38	0.36	-0.03	0.29	1.77	2.26	-0.16	0.11	0.24	1.98	2.19	0.51	0.22	-0.25	-0.16	-0.05	0.19	-0.43	0.44	-0.01	-0.01	1.29	0.91	-0.1	0.46	0.55	0.51	0.46	1.81	2.75	0.36	0.05	0.43	1.52
GENE398X	4502	 MT2A -  metallothionein 2A	1	-0.21	-0.26	0.11	0.3	0.06	1.83	2.17	-0.06	-0.27	0.2	1.52	2.93	0.89	0.38	0.02	-0.09	0.51	0.1	0.02	-0.41	0.35	0.04	1.62	1.09	0.27	0.51	0.58	0.09	-1.29	1	2.32	0.6	0.2	0.56	0.25
GENE1001X	4490	 MT1B -  metallothionein 1B	1	-0.18	0.06	0.05	0.14	-0.07	0.73	1.28	-0.46	-0.25	-0.12	0.8	2.76	0.24	0.38	-0.27	-0.34	0.33	-0.12	0.21	-0.29	0.11	-0.17	1.56	0.47	0.33	0.39	0.74	0.03	-0.26	1.69	2.19	-0.27	-0.04	0.06	-0.12
GENE1302X	4504	 MT3 -  Metallothionein 3	1	-1.2	-0.22	0.6	0.05	0.78	1.36	1.71	-0.15	0.21	0.35	1.4	3.47	0.1	0.43	-0.15	-0.25	0.07	-0.34	0.41	-0.17	-0.34	0.12	0.85	0.14	-0.08	0.47	0.8	-0.14	-0.46	1.79	2.29	0.2	-0.22	-0.31	0.04
GENE703X	4495	 MT1G -  Metallothionein 1G	1	-0.49	-0.26	0.28	0.21	0.27	1.62	2.32	-0.06	-0.15	0.28	1.88	5.41	0.31	0.08	0.72	0	-0.37	-0.51	0.55	-0.28	-0.24	-0.02	1.47	-0.23	-0.04	0.63	1.04	0.27	-0.34	2.36	3.39	0.13		-0.04	0.03
GENE388X	4496	 MT1H -  Metallothionein 1H	1	-0.64	1.4	-0.41	-0.03	-0.31	1.27	1.94	-0.42	-0.74	-0.38	1.52	5.26	-0.13	-0.52	-0.16	-0.14	-0.37	-1.13	0.38	0.42	-0.36	-0.44	0.68	-0.17	0.1	0.38	1.13	0.06	-1.23	2.67	3.6	0.14	-0.2	0.1	0.15
GENE1103X	4494	 MT1F -  Metallothionein 1F	1	-0.24	-0.02	-0.1	0.42	-0.06	1.5	2.19	-0.15	-0.43	0.31	1.72	4.65	0.4	0.07	-0.32	-0.02	0.53	-0.84	0.3	0.53	-0.23	-0.6	0.25	0.18	0.4	0.36	0.89	0.09	-0.96	2.41	3.23	0.17	0.3	0.18	0.13
GENE600X	4501	 MT1X -  Metallothionein 1X	1	-0.11	0.18	-0.17		0.11	1.61	2.97	-0.26	-0.3	0.11	2.28	5.12	0.42	-0.09	0.15	0.12	0.16	-0.72	0.6	0.33	-0.04	-0.88	-0.11	-0.09	0.23	0.15	0.93	0.18	-2.01	2.43	3.05	-0.26	-0.25	0.17	0.02
GENE689X	4500	 MT1L -  metallothionein 1L (gene/pseudogene)	1	-0.02	-0.05	-0.31	0.3	0.08	1.58	2.49	-0.38	-0.48	0	2.06	4.65	0.44	-0.15	-0.28	-0.08	0.04	-0.52	0.84	0.47	-0.07	-1.23	-0.51	0.08	0.41	0.06	0.55	-0.61	-1.34	2.22	2.75	-0.44	-0.53	0	-0.27
GENE1282X	189	 AGXT -  Alanine-glyoxylate aminotransferase	1	-0.26	-0.09	0.16	0.17	0.01	1.76	2.54	-0.2	-0.17	0.37	2.12	5.03	0.36	0.27	0.21	-0.19	0.03	-0.39	0.33	0.07	0.12	-0.52	1.17	0.43	0.54	0.25	0.64	0.75	-1.41	1.88	1.98	0.93	0.42	0.36	0.27
GENE334X	4493	 MT1E -  Metallothionein 1E	1			0.07		-0.07	1.95	2.69	-0.18	-0.33	0.21	2.29	5.51	0.47	-0.01	-0.38	0.5	0.06	-0.38	0.16		1.8	-1.96	-1.16	-0.86	0.04	-0.18	0.25	-0.92	-2.85	1.39	3.1	-0.64	-0.88	-0.15	-0.59
GENE155X	1646	" AKR1C2 -  aldo-keto reductase family 1, member C2 (dihydrodiol dehydrogenase 2; bile acid binding protein; 3-alpha hydroxysteroid dehydrogenase, type III)"	1	0.46	-0.29	0.21	-0.16	-0.2	1.58	2.39	-0.3	-0.34	-0.04	1.9	2.14	-0.39	-1.04	-0.39	-0.11	-0.49	-0.59	0.49	-1.09	0.6		-0.05	-0.7		-0.33			-1.81	0.65	1.61		0.24	-0.36	0.72
GENE348X	1645	" AKR1C1 -  Aldo-keto reductase family 1, member C1 (dihydrodiol dehydrogenase 1; 20-alpha (3-alpha)-hydroxysteroid dehydrogenase)"	1	-0.42	0.1	0.36	-0.02	-0.03	1.8	2.7	-0.11	-0.09	0.45	2.32	2.1	0.2	-0.69	0.06	-0.44	-0.16	-0.53	0.04	-0.47	0.03	0.41	0.82	-0.3	0.18	0.24	0.24	0.37	-1.61	0.29	1.89	0.63	0.11	-0.09	1.08
GENE543X	26872	 STEAP1 -  Six transmembrane epithelial antigen of the prostate 1	1	0.55	-0.09	0.56	-0.85	-0.18	2.05	2.34	-0.17	-0.1	-0.76	0.82	0.12	-0.22	0.14	-0.18	-0.83	-0.89	-0.29	0.26	-0.01	0.17	-0.41	0.55	0.09	-0.08	-0.4	-0.56	0.38	-1.07	1.66	2.08	0.23	0.06	-0.31	-0.95
GENE1173X	2791	" GNG11 -  Guanine nucleotide binding protein (G protein), gamma 11"	1	0.55	-0.23	0.04	-0.37	-0.11	2.41	2.76	-0.28	-0.25	-0.32	-0.39	0.51	-0.63	-0.41	-0.53	-0.71	-0.73	-1.05	-0.03	0.5	0.12	-0.61	0.17	0.26	0.19	-0.37	0.09	-0.6	-1.22	1.4	2.31	-0.22	-0.93	-0.38	-0.38
GENE1326X	100137047	 JMJD7 -  Jumonji domain containing 7	1	-0.13	0.06	0.3	-0.3	0.07	2.1	2.19	-0.25	-0.15	-0.31	-0.28	-1.06	0.42	-0.76	-0.46	-0.56	-0.31	-1.23	0.79	0.12	-0.49	-0.41	-0.07	0.29	-0.25	-0.41	0.14	-0.89	-1.46	1.26	1.35	-0.38	-0.81	-0.07	-0.6
GENE383X	3553	" IL1B -  Interleukin 1, beta"	1	0.01	0.11	-0.75	0.56	0.06	4.04	3.42	0.1	0.78	2.17	1.37	1.92	-0.15	-1.17	0.62	0.51	0.47	-2.25	0.06	0.08	0.12	-0.26	2.78	0.97	-0.03	-0.15	0.59	0.22	0.59	3.45	5.1	-0.29	0.02	1.23	0.08
GENE1841X	22990	 PCNX -  Pecanex homolog (Drosophila)	1	-0.15	-0.29	0.15	0.3	-0.02	1.6	1.54	0.29	0.03	0.14	0.9	0.77	-0.2	0.04	-0.27	-0.12	-0.71	-0.35	0.14	-0.4	0.59	-0.33	-0.4	0.57	0.06	-0.87	-0.13	-0.27	0.04	1.33	1.62	-1.32	-0.48	-0.66	0.62
GENE1468X	8651	 SOCS1 -  Suppressor of cytokine signaling 1	1	-0.1	0.05	0.16	0.09	-0.19	0.63	1.34	-0.09	-0.25	0.69	1.56	1.84	0	0	-0.28	-0.25	0.08	1.11	0.02	-0.3	0.1	0.12	-0.7	-0.8	-0.16	-0.28	0.35	-0.5	0.37	1.17	2.09	0.11	-0.04	-0.24	0.66
GENE158X	4189	" DNAJB9 -  DnaJ (Hsp40) homolog, subfamily B, member 9"	1	-0.03	0.06	-0.14	0.1	0	2.85	2.98	0.21	0	1.1	2.98	3.52	0.71	0.56	0.25	0.25	0.94	2.51	-0.07	-0.4	-0.03	0.51			0.2	0.1	2.09		3.59	2.24	4.44	0.43	0.23	-0.09	1.78
GENE1777X	257000	 PLAC2 -  Placenta-specific 2 (non-protein coding)	1	0.07	0.11	0.03	0.06	-0.26	1.42	1.73	1.24	-0.22	1.21	1.82	1.9	0.17	0.39	0.23	0.07	-0.1	0.7	-0.26	0.06	-0.03	0.22	0.3	0.19	-0.32	0.04	-0.41	0.8	1.76	0.38	0.79	1.02	0.98	-0.03	-0.37
GENE711X	5138	" PDE2A -  Phosphodiesterase 2A, cGMP-stimulated"	1	0	-0.32	0.85	-0.27	-0.28	2.67	1.39	0.95	-0.26	0.4	2.07	2.86	-0.73	-0.12	0.22	-0.2	-0.77	0.48	-0.22	-0.66	0.47	0.41	0.43	0.29	-0.53	0.2	-0.24	1.1	1.56	0.52	1.01	1.6	1.73	-0.17	-0.76
GENE544X	525	" ATP6V1B1 -  ATPase, H+ transporting, lysosomal 56/58kDa, V1 subunit B1"	1	0.22	-0.43	-0.17	0.84	-0.46	1.41	0.71	-0.21	-0.91	0.35	2.11	1.79	-0.13	-0.39	-0.55	-0.16	-0.26	0.26	1.47	-0.99	0.31	-0.8	-1.31	-0.53		-0.46	-0.06	-0.3	1.18	0.32	0.08	0.29	0.19	-0.14	-0.04
GENE923X	348938	 NIPAL4 -  NIPA-like domain containing 4	1	0.31		-0.22	-0.27	0.17	1.71	0.25	0.34	0.28	0.45	2.05	1.92	-0.89	-0.95	0.1	0.16	-0.37	2.28	0.28	-0.38	-0.24	0.34	0.31	1	0.1	0.91	0.21	1.33	2.51	0.51	0.28	0.31	0.63	0.47	0.32
GENE1415X	23429	 RYBP -  RING1 and YY1 binding protein	1	0.2	-0.1	0.05	0.01	-0.17	1.74	1.47	-0.07	0.09	1.03	1.57	2.92	-0.34	-0.33	-0.12	0.29	0.09	1.54	0.14	-0.31	0.08	0.09	0.94	-0.21	-0.43	0.55	0.31	1.39	1.25	-0.29	-0.45	-0.02	-0.17	0.3	1.33
GENE1714X	6515	" SLC2A3 -  Solute carrier family 2 (facilitated glucose transporter), member 3"	1	0.29	0.02	0.18	-0.56	0.07	2.64	2.29	0.08	-0.09	0.2	1.75	2.5	0.15	0.12	-0.17	0.18	-0.45	0.23	0.53	-0.8	0.67	-0.4	0.88	0.29	0.34	-0.13	0.55	1.59	0.85	0.23	-0.12	0.6	0.8	-0.33	1.01
GENE1136X	9052	" GPRC5A -  G protein-coupled receptor, family C, group 5, member A"	1	0.47	-0.05	-0.25	-0.52	0.37	2.97	2.11	-0.08	0.3	0.38	3.76	4.5	-0.32	-0.36	-0.4	0.05	-0.94	0.14	0.38	-0.06	0.32	-0.64	-0.28	0.41	0.26	-0.04	2.65	3.24	2.53	0.48	0.79	0.61	0.7	0.37	3.03
GENE424X	8412	 BCAR3 -  Breast cancer anti-estrogen resistance 3	1	0.05	-0.05	0.09		-0.08	1.52	1.66	0.09	0.08	0.12	2.12	3.17	0.31	-0.29	-0.23	0.56	0.12	0.38	0.31	-0.36	0.86	-0.81	-1.03	0.4	0.33	0.41	0.23	1.35	1.35	1.54	-0.75	0.7	1.34	0.13	1.62
GENE1003X	4956	 ODF1 -  Outer dense fiber of sperm tails 1	1	-0.01	0.19	0.04	-0.46	0.23	1.8	1.52	-0.65	0.23	-0.3	1.35	1.78	0.32	0.53	0.77	-0.04	0.15	0.46	0.64	0.17		-0.8	-0.07	0.57	-0.11	-0.22	0.64	2.2	2.69	1.76	1.01	0.48	0.35	0.46	0.73
GENE1010X	51765	 MST4 -  Serine/threonine protein kinase MST4	1	-0.29	-0.22	0.06	-0.01	0.46	1.74	2.06	0.27	0.47	0.4	2.46	1.66	-0.17	-0.14	0.17	0.71	0.66	-0.04	0.16	0.8	0.22	-1.18	-0.43	0.65	0	-0.29	0.19	0.87	0.87	0.94	1.4	-0.25	-0.19	0.38	0.22
GENE859X	7159	" TP53BP2 -  Tumor protein p53 binding protein, 2"	1	0.02	-0.22	-0.42	0.21	0.41	1.7	1.3	0.25	0.39	0.21	1.59	2.08	0.14	-0.44	0.05	0.52	0.45	0.43	0.77	0.27	0.27	-1.3	-0.12	1.32	0.29	-0.52	-0.12	1.58	1.59	0.62	0.83	-0.64	-0.57	-0.46	0.42
GENE390X	23261	 CAMTA1 -  Calmodulin binding transcription activator 1	1	0.22	-0.16	0.2	-0.34	0.08	0.22	0.6	0.23	-0.32	0.08	2.3	2.3	-0.51	-0.48	-0.32	-0.45	-0.28	-0.09	0.2	0.06	-0.07	-0.19	-0.2	1.82	0.04	-0.15	0.08	0.76	2.53	0.65	0.59	0.05	-0.18	-0.22	-0.21
GENE1076X	6504	 SLAMF1 -  Signaling lymphocytic activation molecule family member 1	1	0.2	-0.13	0.32	-0.32	-0.06	0.54	0.63	-0.07	-0.15	0.1	2.12	1.59	-0.18	-0.16	0.06	-0.18	0.26	0.55	0.23	-0.19	-0.12	0.07	-0.41	0.22	0.18	-0.5	-0.11	-0.24	1.61	0.04	-0.13	0.17	-0.19	-0.11	-0.28
GENE1686X	375743	 PTAR1  -  protein prenyltransferase alpha subunit repeat containing 1	1	0.05	-0.11	0.22	-0.2	0.03	1.54	1.11	0.06	-0.02	0.89	2.42	2.44	-0.27	-0.31	0.03	0.03	0.54	1.12	0.35	-0.35	-0.02	-0.22	-0.57	0.35	0.13	-0.5	-0.15	0.53	1.33	0.11	0.26	0.07	-0.19	-0.35	0.18
GENE631X	148281	 SYT6 -  Synaptotagmin VI	1	0.97	0.21	-0.33	-0.57	-0.26	2.13	1.17	-0.53	-0.43	-0.35	1.94	2.55	-0.37	-0.5	-0.35	-0.2		-1.15	0.72	0.28	-0.52	-0.49	-0.94	-0.13	0	-0.64	-0.04	-0.12	2.29	0.43	0.29		-0.77	0.18	-0.08
GENE563X	635	 BHMT -  Betaine-homocysteine methyltransferase	1	0.05	0.07	-0.18	-0.02	0.09	1.28	0.84	0.36	-0.19	0.71	1.57	1.93	-0.78	-1.07	0.47	0.08		-1.85	0.36	-0.01	0.07	-0.41	-0.42	-0.41	-0.31	-0.76	-0.31	0.04	3.79	-0.17	0.33	0.18	-0.78	0.02	-0.25
GENE1205X	9592	 IER2 -  Immediate early response 2	1	0.16	-0.14	-0.11	0.2	-0.11	1.74	1.4	-0.15	-0.01	1.66	1.83	1.7	-0.37	-0.48	-0.35	0.08	-0.06	-0.92	1.04	0.1	0.02	-0.78	-0.57	-0.55	0.75	-0.34	-0.15	0.71	1.97	0.51	-0.14	0.39	-0.14	-0.69	-0.36
GENE539X	94039	 ZNF101 -  zinc finger protein 101	1	0.68	-0.43	-0.21		-0.05	0.13	0.7	-0.05	-0.26	-0.41	1.05	2.18	-0.75	-0.76	-0.16	-0.22	-0.48	0.15	0.13	-0.21	0.71	-0.62	-0.61	0.35	0.09	-0.52	-0.53	0.97	2.24	0.59	0.47	0.58	0.2	-0.25	1.65
GENE371X	7855	 FZD5 -  frizzled homolog 5 (Drosophila)	1	-0.1	0.01	-0.39	0.39	0.11	0.7	0.57	-0.17	-0.1	0.24	1.18	1.93	0.07	0	0.2	0.18	-0.08	0.64	-0.3	0.08	-0.26	0.49	-0.6	0.82	-0.26	0.13	0.03	0.13	3.48	-0.28	0.95	-0.02	0.3	-0.1	0.35
GENE238X	4610	" MYCL1 -  V-myc myelocytomatosis viral oncogene homolog 1, lung carcinoma derived (avian)"	1	0.15	0.06	-0.59	0.27	0.12	-0.42	1.55	-0.06	-0.12	-0.45	0.52	2.52	1.05	0.3	-0.25	0.15	0.33	2.06	0.01	0.38	-0.03	-0.35	-0.16	1.65	-0.07	-0.13	0.36	1.18	3.41	0.76	0.58	0	0.16	0.59	2.03
GENE225X	1071	" CETP -  Cholesteryl ester transfer protein, plasma"	1	-0.08	0.44	-0.03	-0.41	0.09	-0.05	0.31	-0.53	-0.13	0.33	0.46	2.3	-0.17	-0.44	-0.89	-0.78		-0.07	0.69	0.14	-0.18	-0.66	-0.86	0.66	-0.2	-1.05	-0.83	0.71	3.97	-0.21	-0.04	-0.09	-0.46	0	0.19
GENE223X	284391	 ZNF844 -  zinc finger protein 844	1	0.29	-0.24	-0.06	0.16	-0.14	0.16	0.46	0.06	-0.09	-0.38	0.38	2.4	-0.07	-0.18	0.03	0.05		0.79	0.31	-0.18	0.28	-0.4	-0.07	0.98	0.24	0.05	-1.1	0.74	2.95	-0.58	0.64	-0.28	-0.7	-0.14	1.26
GENE1167X	29766	 TMOD3 -  Tropomodulin 3 (ubiquitous)	1	0.08	-0.07	-0.16	0.07	0.08	0.96	1.49	-0.35	-0.06	-0.59	0.92	1.85	0.54	-0.06	-0.27	-0.02	0.23	0.83	0.22	0.12	0.19	-0.55	-0.6	-0.1	0.37	-0.35	-0.85	0.9	2.1	0.8	0.54	-0.44	-0.57	0.22	0.94
GENE365X	253143	 C22orf30 -  Chromosome 22 open reading frame 30	1	-0.03		0.16	-0.27	0.14	0.45	0.92	0.18	-0.04	-0.29	1.23	3.28	-0.16	0.11		-0.24		1.33	0.11		0.12	-0.23	-0.77	-0.09	-0.42	-0.54	-0.38	0.37	2.85	0.04	0.55	-0.19	-0.59	-0.64	1.43
GENE1072X	80198	 MUS81 -  MUS81 endonuclease homolog (S. cerevisiae)	1	0.17	0.28	-0.05	-0.47	0.07	1	0.96	-0.28	0.1	0.02	1.83	2.22	0.86	0.3	-0.55	-0.36		2.07	0.11	0.25	-0.11	-0.24	-0.28	0.01	-0.32	-0.92	-0.16	0.12	2.04	0.26	0.27	-0.46	-0.92	-0.32	0.89
GENE175X	80194	 TMEM134 -  Transmembrane protein 134	1	-0.07	0.02	0.07	-0.12	0.11	0.78	1.33	0.46	0.53	1.22	0.81	1.7	-0.26	-0.56	0.5	0.71	0.39	0.43	0.28	-0.16	0.12	-0.24	0.53	0.8	-0.01	-0.18	-0.34	1.5	2.81		0.5	-0.44	-0.84	-0.25	0.3
GENE1828X	221037	 JMJD1C -  Jumonji domain containing 1C	1	-0.19	0	-0.13	0.22	0.1	0.93	0.92	0.05	0.58	1.19	1.89	1.9	-0.05	-0.04	0.43	0.6	0.01	-0.29	0.15	0.04	0.04	-0.22	0.93	0.16	0.06	-0.03	0.03	1.93	1.2	-0.26	-0.08	-0.34	-0.09	-0.53	0.53
GENE176X	8521	 GCM1 -  Glial cells missing homolog 1 (Drosophila)	1	0.54	0.08	0.12	-1.23	0.49	0.44	-0.5	0.26	0.19	0.44	2.89	4.3	0.55	0.86	0.41	1.03		1.04	-0.12	0.26	-0.66	0.51	0.47	0.44	-0.26	0.25	0.29	0.25	2.65	0.13	0.42	0.46	0.08	0.25	1.08
GENE1709X	26511	 CHIC2 -  Cysteine-rich hydrophobic domain 2	1	-0.17	0.13	-0.12	-0.13	0.27	0.71	0.7	0.31	-0.03	0.48	-0.43	2.04	-0.23	-0.48	0.33	0.81	0.09	-0.42	0.31	-0.17	0.22	-0.36	1.7	1.12	-0.65	-0.14	1.24	0.17	-0.32	-0.11	-0.41	0.11	0.12	1.01	0.09
GENE664X	10527	 IPO7  -  importin 7	1	-0.19	-0.16	0.27	0.17	-0.07	1.63	0.83	-0.3	-0.44	-0.15	0.6	0.5	0.42	0.64	-0.22	-0.43	-0.15	0.9	-0.01	-0.3	-0.17	0.49	1.65	0.31	0.09	0.81	0.61	0.79	-0.57	0.13	-0.4	0.47	0.81	0.23	-0.21
GENE150X	6581	" SLC22A3 -  Solute carrier family 22 (extraneuronal monoamine transporter), member 3"	1	0.46	0.23	-0.92	0.27	-0.06	1.61	1.76	0.2	-0.35	0.12	0.84	0.78	0.65	0.64	0.25	-0.07	0.15	-0.13	-0.55	-0.85	0.88	0.53		1.39	0.47	0.26	0.47	1.22	-0.9	0.25	0	0.68	0.55	-0.02	0.63
GENE267X	10019	 SH2B3 -  SH2B adaptor protein 3	1	-0.12	-0.09	-0.21	0.23	0.19	0.64	0.58	0.31	0.41	0.3	0.69	1.54	-0.03	-0.02	0.17	0.5	0.02	0.66	0.48	-1.01	0.36	0.18	1.78	1.53	-0.24	0.33	0.59	2.1	-1.09	1.42	0.69	-0.3	0.77	0.91	0.79
GENE692X	838	" CASP5 -  Caspase 5, apoptosis-related cysteine peptidase"	1	0.13	0.18	-0.32	0.13	-0.14	1.57	2.23	-0.19	-0.13	0.64	2	2.64	0.62	0.31	0.15	-0.39	0.12	0.46	-0.19	-0.53	0.46	0.27	1.66	1.67	0.48	-0.13	0.76	1.64	-0.49	2.88	2.69	0.71	-0.29	2.54	2.35
GENE1350X	5366	 PMAIP1 -  Phorbol-12-myristate-13-acetate-induced protein 1	1	-0.1	-0.22	0.12	0.06	0.14	1.25	2.25	0.4	0.08	1.49	2.81	1.85	-0.12	0.19	-0.02	-0.2	0.31	0.16	-0.05	-0.21	0.24	0.02	0.83	1.76	0.11	-0.52	0.76	1.58	0.62	2.84	2.73	0.17	-0.23	2.93	2.32
GENE1065X	10748	" KLRA1 -  killer cell lectin-like receptor subfamily A, member 1, pseudogene"	1	-0.08	-0.23	0.09	-0.09	0.29	1.26	2.06	0.19	0.26	0.96	2.97	2.23	-0.05	0.32	0.04	0.12	-0.08	0.05		0.03	0.43	-0.45	1.38	1.4	-0.1	-0.88	1.2	2.53	0.54	3.78	2.89	0.67	-0.12	3.22	3.55
GENE1732X	57162	 PELI1 -  Pellino homolog 1 (Drosophila)	1	0.01	-0.13	0.12	-0.05	0.05	1.52	0.77	-0.47	0.98	0.98	1.75	2.18	0.79	0.14	0.6	0.99	0.97	1.6	0.05	-0.17	-0.08	0.2	1.27	0.87	-0.16	0.31	1.88	1.51	1.05	1.49	2.24	0.17	0.38	1.33	2.44
GENE1721X	57600	 FNIP2 -  folliculin interacting protein 2	1	-0.26	0	-0.17	0.56	-0.13	0.98	1.21	-0.03	-0.66	0.23	1.47	1.52	0.03	0.08	0.18	-0.3	0.45	1.71	-0.34	-0.38	0.03	0.69	0.67	0.46	0.16	0.23	0.58	1.44	0.86	0.82	0.94	0.41	-0.25	0.1	1.94
GENE779X	57609	 DIP2B -  DIP2 disco-interacting protein 2 homolog B (Drosophila)	1	-0.34	-0.09	0.37	0.25	-0.2	0.9	1.52	-0.16	-0.3	-0.45	0.82	1.65	0.5	0.17	0.31	-0.64	-0.45	0.32	-0.3	-0.84	0.17	0.98	1.07	0.78	0.2	0.88	0.73	1.42	1.61	1.58	2.01	1.11	0.88	0.41	2.34
GENE1294X	2005	" ELK4 -  ELK4, ETS-domain protein (SRF accessory protein 1)"	1	0.03	-0.08	-0.04	0.04	0.05	1.94	1.4	-0.17	0.06	0.47	0.59	1.56	-0.34	-0.27	0.11	-0.04	0.11	0.04	-0.05	-0.47	0.38	0.15	0.77	-0.22	0.27	0.57	0.64	1.18	1.03	1.23	0.81	0.97	1.12	0.62	1.98
GENE750X	7185	 TRAF1 -  TNF receptor-associated factor 1	1	0.32	0.06	0.13	-0.4	-0.08	0.46	1.11	-0.22	-0.13	0.63	0.6	1.7	-0.01	-1.03	-0.27	0.39	1.41	-0.36	-0.11	-0.27	0.16	0.22	0.55	0.51	0.06	0.27	0.28	1.04	1.33	2.24	1.83	0.39	0.39	0.67	1.18
GENE1620X	8351	" HIST1H3D -  Histone cluster 1, H3d"	1	-0.43	0.17	0.16	0.3	-0.21	0.28	0.09	-0.16	-0.41	0.21	0.55	0.58	-0.58	-1.03	-0.07	-0.29	-0.59	-0.7	0.22	0.01	-0.17	-0.05	-0.09	0.83	0.56	0.32	0.41	1.69	1.79	1.02	1.14	0.49	-0.38	0.34	0.12
GENE593X	2920	 CXCL2 -  chemokine (C-X-C motif) ligand 2	1	0	-0.35	-0.15	0.22	0.28	1.64	0.94	0.33	-0.12	1.32	1.81	1.14	-0.42	-0.7	-0.07	0.12	-0.16	0.26	0.71	-0.14	0.08	-0.64	0.18	0.97	0.71	0.11	0.94	1.18	1.75	2.17	2.42	0.27	0.21	1.29	1.44
GENE1116X	2919	" CXCL1 -  Chemokine (C-X-C motif) ligand 1 (melanoma growth stimulating activity, alpha)"	1	-0.11	-0.18	0.05	0.14	0.1	2.03	0.4	0.87	0.26	1.94	1.49	0.88	-0.83	-0.95	0.81	0.21	0.72	0.62	0.41	-0.32	0.03	-0.13	0.65	0.11	1.38	2	2.78	2.44	2.1	3.77	4.11	1.3	2	3.39	1.95
GENE153X	2921	 CXCL3 -  Chemokine (C-X-C motif) ligand 3	1	-0.08	0.73	-0.97		0.32	2.49	0.82	1.06	0.7	3.25	1.49	1.11	-1.32	-2.13	1.08	0.73	-0.76	0.51	-0.85		0.3	0.55		3.31	1.55	1.24	3.68	6.77	5.41	6.59	6.62	2.03	1.82	6.06	4.94
GENE1869X	8013	" NR4A3 -  Nuclear receptor subfamily 4, group A, member 3"	1	0.04	-0.07	-0.07	0.12	0.02	0.97	-0.05	0.1	-0.09	1.46	0.24	-0.45	-0.32	-0.23	-0.11	0.03	-0.31	-1.09	0.21	-0.23	0.21	-0.27	0.94	0.02	0.76	1.16	1.24	1.63	1.84	1.46	1.46	0.62	1.23	1.17	0.47
GENE257X	9120	" SLC16A6 -  Solute carrier family 16, member 6 (monocarboxylic acid transporter 7)"	1	0.59	0.64	0.01	-1.16	-0.1	2.68	2.41	0.2	1.19	2.1	0.99	1.62	0.46	-0.81	0.57	1.41	0.71	2.58	0.32	-0.03	0.7	-0.98	1.33	1.36	0.48	1.64	2.49	1.67	3.66	2.73	1.67	0.91	2.35	2.16	3.94
GENE1678X	10560	" SLC19A2 -  Solute carrier family 19 (thiamine transporter), member 2"	1	0.35	-0.11	0.09	-0.25	-0.1	1.21	0.62	-0.58	0.54	0.82	1.43	1.62	0.27	0.09	0.04	0.73	-0.01	2.08	0.62	-0.16	0.27	-0.73	0.94	1	0.34	0.84	1.67	2.2	3.5	0.09	0.61	0.77	0.99	0.35	2.47
GENE1583X	150094	 SIK1 -  Salt-inducible kinase 1	1	-0.08	-0.1	0.22	-0.08	0.02	1.76	1.02	0.51	0.37	3.47	2.62	3.31	-0.71	-0.09	0.19	0.16	-0.56	1.36	-0.12	0.09	0.09	-0.08	1.61	1.75	1.21	2.75	3.06	2.4	3.02	1.39	1.54	1.93	3.59	1.11	4.58
[truncated: 77,786 more chars]
