# Supplementary material for: Stunned Silence: Gene Expression Programs in Human Cells Infected with Monkeypox or Vaccinia Virus
Source: PubMed Central journal article supplement (PMC3022624; doi:10.1371/journal.pone.0015615), 2011-01-18
Supplement: pone.0015615.s007.pdf [file pone.0015615.s007.pdf]

| Cells                     | Source       | Virus      | Stimulation | Timepoints                          |
|---------------------------|--------------|------------|-------------|-------------------------------------|
| Primary Human Macrophages | NIH, Donor 1 | Mock       |             | 0, 2, 4, 12, 24                     |
| Primary Human Macrophages | NIH, Donor 1 | Killed MPX |             | 0, 2, 4, 8, 12, 24                  |
| Primary Human Macrophages | NIH, Donor 1 | VAC-WR     |             | 0, 2, 4, 8, 12, 24                  |
| Primary Human Macrophages | NIH, Donor 1 | MPX        |             | 0, 2, 4, 8, 12, 24                  |
| Primary Human Macrophages | NIH, Donor 1 | EBOV       |             | 0, 2, 4, 8, 12, 24                  |
| Primary Human Macrophages | NIH, Donor 2 | Mock       |             | 0, 0.5, 1, 1.5, 2, 4, 9, 12, 24, 48 |
| Primary Human Macrophages | NIH, Donor 2 | Killed MPX |             | 0, 0.5, 1, 1.5, 2, 4, 9, 12, 24, 48 |
| Primary Human Macrophages | NIH, Donor 2 | VAC-NY     |             | 0, 0.5, 1, 1.5, 2, 4, 9, 12, 24, 48 |
| Primary Human Macrophages | NIH, Donor 2 | VAC-WR     |             | 0, 0.5, 1, 1.5, 2, 9, 12, 24        |
| Primary Human Macrophages | NIH, Donor 2 | MPX        |             | 0, 0.5, 1, 1.5, 2, 4, 9, 12, 24, 48 |
| Primary Human Macrophages | Clonetics    | Mock       |             | 0, 1, 2, 6, 12, 24                  |
| Primary Human Macrophages | Clonetics    | Killed MPX |             | 0, 1, 2, 6, 12, 24                  |
| Primary Human Macrophages | Clonetics    | VAC-WR     |             | 0, 1, 2, 6, 12, 24                  |
| Primary Human Macrophages | Clonetics    | MPX        |             | 0, 1, 2, 6, 12, 24                  |
| Primary Human Macrophages | Clonetics    | Mock       | I+P         | 0, 12, 24                           |
| Primary Human Macrophages | Clonetics    | MPX        | I+P         | 0, 1, 2, 6, 12, 24                  |
| Primary Human Macrophages | Clonetics    | Mock       | Poly [I.C]  | 0, 12, 24                           |
| Primary Human Macrophages | Clonetics    | MPX        | Poly [I.C]  | 0, 1, 2, 6, 12, 24                  |
| Primary Human Fibroblasts | Skin Biopsy  | Mock       |             | 0, 1, 2, 4, 8, 12, 24               |
| Primary Human Fibroblasts | Skin Biopsy  | Killed MPX |             | 0, 1, 2, 4, 8, 12, 24               |
| Primary Human Fibroblasts | Skin Biopsy  | VAC-WR     |             | 0, 1, 2, 4, 8, 24                   |
| Primary Human Fibroblasts | Skin Biopsy  | MPX        |             | 0, 1, 2, 4, 8, 12, 24               |
| Primary Human Fibroblasts | Skin Biopsy  | EBOV       |             | 0, 1, 2, 4, 8, 12, 24               |
| Primary Human Fibroblasts | Clonetics    | Mock       |             | 0, 1, 2, 6, 12, 24                  |
| Primary Human Fibroblasts | Clonetics    | Killed MPX |             | 0, 1, 2, 6, 12, 24                  |
| Primary Human Fibroblasts | Clonetics    | VAC-WR     |             | 0, 1, 2, 6, 12, 24                  |
| Primary Human Fibroblasts | Clonetics    | MPX        |             | 0, 1, 2, 6, 12, 24                  |
| Primary Human Fibroblasts | Clonetics    | Mock       | I+P         | 0, 12, 24                           |
| Primary Human Fibroblasts | Clonetics    | MPX        | I+P         | 0, 1, 2, 6, 12, 24                  |
| Primary Human Fibroblasts | Clonetics    | Mock       | Poly [I.C]  | 0, 12, 24                           |
| Primary Human Fibroblasts | Clonetics    | MPX        | Poly [I.C]  | 0, 1, 2, 6, 12                      |
| HeLa cells                | ATCC         | Mock       |             | 0, 1, 2, 12                         |
| HeLa cells                | ATCC         | Killed MPX |             | 0, 1, 2, 6, 12, 24                  |
| HeLa cells                | ATCC         | MPX        |             | 0, 2, 6, 12, 24                     |
